# Supplementary material for: High resolution Fourier transform spectroscopy of CH2D2in the region 2350–2650 cm−1: the bands ν5+ ν7, 2ν9, ν3+ ν4, ν3+ ν7and ν5+ ν9
Source: Royal Society of Chemistry journal article supplement (doi:10.1039/b414879g), 2005-01-01
Supplement: b414879g-e1.pdf [file b414879g-e1.pdf]

## Appendix A:

**Tables of Energy Levels for the  $(v_3 = v_4 = 1)$ ,  $(v_5 = v_9 = 1)$ ,  
and  $(v_9 = 2)$ ,  $(v_5 = v_7 = 1)$  Vibrational States, and List of Transitions Belonging to  
the  $\nu_3 + \nu_7$  Band of  $\text{CH}_2\text{D}_2$ .**

Electronic supplementary materials to:

**High Resolution Fourier Transform Spectroscopy of  $\text{CH}_2\text{D}_2$  in the Region 2350 -  
2650  $\text{cm}^{-1}$ : The Bands  $\nu_5 + \nu_7$ ,  $2\nu_9$ ,  $\nu_3 + \nu_4$ ,  $\nu_3 + \nu_7$ , and  $\nu_5 + \nu_9$**

O. N. Ulenikov, E. S. Bekhtereva, S. V. Grebneva

Laboratory of Molecular Spectroscopy, Physics Department,  
Tomsk State University, Tomsk, 634050, Russia,  
and Institute of Atmospheric Optics SB RAN, Tomsk, 634055, Russia

H. Hollenstein, M. Quack

Physical Chemistry, ETH-Zürich,  
CH-8093 Zürich, Switzerland

Table 1A. Experimental Rovibrational Term Values for the  $(v_3 = v_4 = 1)$  and  $(v_5 = v_9 = 1)$  Vibrational States of the  $\text{CH}_2\text{D}_2$  Molecule (in  $\text{cm}^{-1}$ ).

Table 2A. Experimental Rovibrational Term Values for the  $(v_9 = 2)$  and  $(v_5 = v_7 = 1)$  Vibrational States of the  $\text{CH}_2\text{D}_2$  Molecule (in  $\text{cm}^{-1}$ ).

Table 3A. List of Transitions Belonging to the  $\nu_3 + \nu_7$  Band of  $\text{CH}_2\text{D}_2$ .

Table 1A. Experimental Rovibrational Term Values for the ( $v_3 = v_4 = 1$ ) and ( $v_5 = v_9 = 1$ )  
Vibrational States of the CH<sub>2</sub>D<sub>2</sub> Molecule (in cm<sup>-1</sup>)<sup>a</sup>

| $J$ | $(v_3 = v_4 = 1)$ |       |                        |          |          | $(v_5 = v_9 = 1)$      |          |          |
|-----|-------------------|-------|------------------------|----------|----------|------------------------|----------|----------|
|     | $K_a$             | $K_c$ | $E/hc, \text{cm}^{-1}$ | $\Delta$ | $\delta$ | $E/hc, \text{cm}^{-1}$ | $\Delta$ | $\delta$ |
|     | 1                 |       | 2                      | 3        | 4        | 5                      | 6        | 7        |
| 0   | 0                 | 0     | 2469.2023              |          | -3       | 2560.5489              |          | 35       |
| 1   | 0                 | 1     | 2475.8352              | 1        | 1        | 2567.0382              | 1        | 15       |
| 1   | 1                 | 1     | 2476.1267              | 5        | 7        | 2567.8357              | 2        | 14       |
| 1   | 1                 | 0     | 2476.6836              | 4        | 11       | 2568.3656              | 1        | 20       |
| 2   | 0                 | 2     | 2488.7681              | 1        | 1        | 2579.8289              | 9        | -6       |
| 2   | 1                 | 2     | 2488.8475              | 9        | 13       | 2580.2875              | 3        | 1        |
| 2   | 1                 | 1     | 2490.4958              | 1        | 4        | 2581.8759              | 5        | 14       |
| 2   | 2                 | 1     | 2491.4568              | 5        | 10       | 2584.2688              | 4        | 17       |
| 2   | 2                 | 0     | 2491.8091              | 6        | 8        | 2584.4586              | 4        | 19       |
| 3   | 0                 | 3     | 2507.7939              | 2        | -2       | 2598.6636              | 10       | -15      |
| 3   | 1                 | 3     | 2507.8036              | 2        | 8        | 2598.8629              | 8        | -18      |
| 3   | 1                 | 2     | 2510.8843              | 3        | -6       | 2601.9901              | 5        | 2        |
| 3   | 2                 | 2     | 2511.3183              | 5        | 10       | 2603.7394              | 5        | 10       |
| 3   | 2                 | 1     | 2512.6148              | 2        | 16       | 2604.5683              | 4        | 21       |
| 3   | 3                 | 1     | 2514.7732              | 2        | -1       | 2609.1517              | 5        | 8        |
| 3   | 3                 | 0     | 2514.9353              | 2        | 1        | 2609.1981              | 3        | 13       |
| 4   | 0                 | 4     | 2532.9832              | 7        | 0        | 2623.4187              | 12       | -38      |
| 4   | 1                 | 4     | 2532.9593              | 5        | 44       | 2623.4908              | 15       | -38      |
| 4   | 1                 | 3     | 2537.4502              | 6        | -17      | 2628.4777              | 7        | -14      |
| 4   | 2                 | 3     | 2537.5544              | 7        | -18      | 2629.5464              | 4        | 2        |
| 4   | 2                 | 2     | 2540.2957              | 5        | 12       | 2631.5749              | 15       | 26       |
| 4   | 3                 | 2     | 2541.6075              | 8        | 17       | 2635.3929              | 3        | 25       |
| 4   | 3                 | 1     | 2542.4437              | 6        | 19       | 2635.6869              | 9        | 29       |
| 4   | 4                 | 1     | 2546.4599              | 3        | -13      | 2642.5882              | 8        | -1       |
| 4   | 4                 | 0     | 2546.5153              | 16       | -18      | 2642.5969              | 6        | -6       |
| 5   | 0                 | 5     | 2564.4137              | 15       | 69       | 2654.1042              | 11       | -40      |
| 5   | 1                 | 5     | 2564.4137              | 15       | 26       | 2654.1285              | 5        | -31      |
| 5   | 1                 | 4     | 2570.0678              | 6        | -51      | 2661.0451              | 6        | -34      |
| 5   | 2                 | 4     | 2570.0707              | 9        | -34      | 2661.5770              | 9        | -15      |
| 5   | 2                 | 3     | 2574.4465              | 6        | 5        | 2665.3070              | 4        | 0        |
| 5   | 3                 | 3     | 2574.9962              | 7        | 9        | 2668.1550              | 5        | 26       |
| 5   | 3                 | 2     | 2577.1398              | 9        | 12       | 2669.1416              | 4        | 42       |
| 5   | 4                 | 2     | 2580.0635              | 3        | 13       | 2675.4562              | 6        | 30       |
| 5   | 4                 | 1     | 2580.4720              | 11       | 15       | 2675.5344              | 4        | 37       |
| 5   | 5                 | 1     | 2586.8993              | 10       | -12      | 2684.6091              | 2        | -36      |
| 5   | 5                 | 0     | 2586.9154              | 7        | -11      | 2684.6113              | 2        | -30      |
| 6   | 0                 | 6     | 2602.1337              | 20       | 52       | 2690.7470              | 3        | -25      |
| 6   | 1                 | 6     | 2602.1337              | 20       | 49       | 2690.7544              | 8        | -31      |
| 6   | 1                 | 5     | 2608.8479              | 4        | 4        | 2699.5066              | 12       | -48      |
| 6   | 2                 | 5     | 2608.8466              | 9        | -35      | 2699.7293              | 5        | -27      |
| 6   | 2                 | 4     | 2614.6708              | 5        | 10       | 2705.4969              | 4        | -30      |
| 6   | 3                 | 4     | 2614.7877              | 4        | -3       | 2707.3402              | 6        | 13       |
| 6   | 3                 | 3     | 2618.6385              | 7        | -67      | 2709.6109              | 5        | 30       |
| 6   | 4                 | 3     | 2620.3922              | 4        | 27       | 2714.9539              | 4        | 52       |
| 6   | 4                 | 2     | 2621.7892              | 7        | 21       | 2715.3003              | 5        | 62       |
| 6   | 5                 | 2     | 2627.1050              | 7        | -2       | 2724.0515              | 7        | 22       |
| 6   | 5                 | 1     | 2627.2575              | 8        | 3        | 2724.0687              | 4        | 21       |
| 6   | 6                 | 1     | 2636.2365              | 9        | -2       | 2735.2175              | 18       | -62      |
| 6   | 6                 | 0     | 2636.2365              | 9        | -42      | 2735.2175              | 18       | -65      |
| 7   | 0                 | 7     | 2646.1435              | 15       | 67       | 2733.3650              | 4        | -4       |
| 7   | 1                 | 7     | 2646.1435              | 15       | 66       | 2733.3650              | 4        | -8       |
| 7   | 1                 | 6     | 2653.9064              | 5        | -44      | 2743.8491              | 6        | -40      |
| 7   | 2                 | 6     | 2653.9070              | 15       | -32      | 2743.9304              | 8        | -22      |
| 7   | 2                 | 5     | 2660.8759              | 5        | 8        | 2751.8250              | 3        | -45      |
| 7   | 3                 | 5     | 2660.8900              | 2        | -7       | 2752.8272              | 4        | -6       |
| 7   | 3                 | 4     | 2666.4959              | 7        | -43      | 2756.9301              | 4        | 7        |
| 7   | 4                 | 4     | 2667.2879              | 14       | 27       | 2761.0340              | 11       | 39       |
| 7   | 4                 | 3     | 2670.3385              | 20       | 13       | 2762.0810              | 3        | 71       |

Table 1A (cont.)

| $J$ | $(v_3 = v_4 = 1)$ |       |                        |          |          | $(v_5 = v_9 = 1)$      |          |          |
|-----|-------------------|-------|------------------------|----------|----------|------------------------|----------|----------|
|     | $K_a$             | $K_c$ | $E/hc, \text{cm}^{-1}$ | $\Delta$ | $\delta$ | $E/hc, \text{cm}^{-1}$ | $\Delta$ | $\delta$ |
|     | 1                 |       | 2                      | 3        | 4        | 5                      | 6        | 7        |
| 7   | 5                 | 3     | 2674.1448              | 15       | 14       | 2770.1627              | 6        | 46       |
| 7   | 5                 | 2     | 2674.8466              | 3        | -8       | 2770.2583              | 5        | 55       |
| 7   | 6                 | 2     | 2682.9809              | 7        | 17       | 2781.2208              | 2        | -3       |
| 7   | 6                 | 1     | 2683.0275              | 15       | 11       | 2781.2243              | 2        | -2       |
| 7   | 7                 | 1     | 2694.3782              | 5        | 21       | 2794.4057              | 13       | -37      |
| 7   | 7                 | 0     | 2694.3782              | 5        | 11       | 2794.4057              | 13       | -37      |
| 8   | 0                 | 8     | 2696.4289              | 22       | 70       | 2781.9796              |          | 21       |
| 8   | 1                 | 8     | 2696.4289              | 22       | 72       | 2781.9717              | 2        | 22       |
| 8   | 1                 | 7     | 2705.2622              | 4        | -64      | 2794.1238              | 6        | -22      |
| 8   | 2                 | 7     | 2705.2664              | 8        | -49      | 2794.1396              | 3        | -18      |
| 8   | 2                 | 6     | 2713.3013              | 3        | 20       | 2804.1050              | 8        | -49      |
| 8   | 3                 | 6     | 2713.2917              | 8        | -1       | 2804.4978              | 4        | -24      |
| 8   | 3                 | 5     | 2720.4117              | 7        | 12       | 2810.8028              | 3        | -27      |
| 8   | 4                 | 5     | 2720.5991              | 4        | 7        | 2813.6079              | 3        | -18      |
| 8   | 4                 | 4     | 2725.6865              | 6        | 20       | 2815.9640              | 3        | 53       |
| 8   | 5                 | 4     | 2727.9076              | 2        | 11       | 2822.9547              | 2        | 39       |
| 8   | 5                 | 3     | 2729.9046              | 7        | -33      | 2823.3135              | 2        | 65       |
| 8   | 6                 | 3     | 2736.5845              | 9        | 0        | 2833.8654              | 3        | 27       |
| 8   | 6                 | 2     | 2736.8587              | 7        | -12      | 2833.8876              | 3        | 25       |
| 8   | 7                 | 2     | 2747.6545              | 7        | 11       | 2846.9683              | 6        | -23      |
| 8   | 7                 | 1     | 2747.6667              | 10       | 0        | 2846.9683              | 6        | -30      |
| 8   | 8                 | 1     | 2761.1831              | 4        | 5        | 2862.1563              | 7        | 5        |
| 8   | 8                 | 0     | 2761.1831              | 4        | 3        | 2862.1563              | 7        | 5        |
| 9   | 0                 | 9     | 2752.9677              | 20       | 70       | 2836.5714              | 12       | 47       |
| 9   | 1                 | 9     | 2752.9677              | 20       | 84       | 2836.5869              | 17       | 23       |
| 9   | 1                 | 8     | 2762.9131              | 14       | -39      | 2850.6342              | 4        | -19      |
| 9   | 2                 | 8     | 2762.9202              | 9        | -39      | 2850.3510              | 5        | 7        |
| 9   | 2                 | 7     | 2772.0150              | 10       | 26       | 2861.9561              | 4        | -67      |
| 9   | 3                 | 7     | 2772.0127              | 7        | 18       | 2862.2616              | 8        | -39      |
| 9   | 3                 | 6     | 2780.2591              | 7        | 38       | 2870.8736              | 5        | -55      |
| 9   | 4                 | 6     | 2780.2520              | 15       | -13      | 2872.5549              | 4        | -26      |
| 9   | 4                 | 5     | 2787.2690              | 24       | 62       | 2876.8140              | 11       | 15       |
| 9   | 5                 | 5     | 2788.2286              | 4        | 11       | 2882.4071              | 6        | -1       |
| 9   | 5                 | 4     | 2792.2283              | 22       | -11      | 2883.4131              | 5        | 65       |
| 9   | 6                 | 4     | 2797.0130              | 12       | -6       | 2893.1763              | 4        | 26       |
| 9   | 6                 | 3     | 2798.0330              | 13       | -61      | 2893.2782              | 3        | 41       |
| 9   | 7                 | 3     | 2807.7697              | 3        | -2       | 2906.1717              | 9        | -11      |
| 9   | 7                 | 2     | 2807.8604              | 6        | -7       | 2906.1767              | 12       | -9       |
| 9   | 8                 | 2     | 2820.9917              | 10       | 78       | 2921.2838              | 10       | -31      |
| 9   | 8                 | 1     | 2820.9917              | 10       | 41       | 2921.2838              | 10       | -32      |
| 9   | 9                 | 1     | 2836.5517              | 29       | -62      | 2938.4588              | 6        | 64       |
| 9   | 9                 | 0     | 2836.5517              | 29       | -63      | 2938.4588              | 6        | 64       |
| 10  | 0                 | 10    | 2815.7285              | 21       | -35      | 2897.2466              | 3        | 18       |
| 10  | 1                 | 10    | 2815.7285              | 21       | 52       | 2897.2745              |          | -20      |
| 10  | 1                 | 9     | 2826.8277              | 9        | -20      | 2912.5026              | 9        | 45       |
| 10  | 2                 | 9     | 2826.8369              | 7        | -48      | 2912.5866              | 11       | 27       |
| 10  | 2                 | 8     | 2837.0418              | 19       | 24       | 2925.8890              | 2        | -19      |
| 10  | 3                 | 8     | 2837.0474              | 5        | 13       | 2926.0788              | 22       | -12      |
| 10  | 3                 | 7     | 2846.3007              | 7        | 51       | 2936.8355              | 6        | -70      |
| 10  | 4                 | 7     | 2846.2247              | 14       | -69      | 2937.7637              | 6        | -58      |
| 10  | 4                 | 6     | 2854.7211              | 8        | -16      | 2944.3326              | 4        | -4       |
| 10  | 5                 | 6     | 2854.9713              | 7        | -24      | 2948.4855              | 6        | -48      |
| 10  | 5                 | 5     | 2861.2917              | 5        | 122      | 2950.6676              | 6        | 56       |
| 10  | 6                 | 5     | 2864.1349              | 9        | 18       | 2959.1535              | 7        | -9       |
| 10  | 6                 | 4     | 2866.7482              | 20       | -83      | 2959.5048              | 16       | 47       |
| 10  | 7                 | 4     | 2874.7427              | 10       | 9        | 2972.0379              | 6        | -15      |
| 10  | 7                 | 3     | 2875.1571              | 13       | -19      | 2972.0641              | 10       | 0        |

Table 1A (cont.)

| <i>J</i> | $(v_3 = v_4 = 1)$    |                      |                              |          |          | $(v_5 = v_9 = 1)$            |          |          |
|----------|----------------------|----------------------|------------------------------|----------|----------|------------------------------|----------|----------|
|          | <i>K<sub>a</sub></i> | <i>K<sub>c</sub></i> | <i>E/hc, cm<sup>-1</sup></i> | $\Delta$ | $\delta$ | <i>E/hc, cm<sup>-1</sup></i> | $\Delta$ | $\delta$ |
|          | 1                    |                      | 2                            | 3        | 4        | 5                            | 6        | 7        |
| 10       | 8                    | 3                    | 2887.5985                    | 2        | 9        | 2987.0397                    | 6        | -38      |
| 10       | 8                    | 2                    | 2887.6253                    | 7        | -6       | 2987.0397                    | 6        | -47      |
| 10       | 9                    | 2                    | 2902.8835                    | 13       | -14      | 3004.1558                    | 5        | -16      |
| 10       | 9                    | 1                    | 2902.8835                    | 13       | -19      | 3004.1558                    | 5        | -16      |
| 10       | 10                   | 1                    | 2920.4268                    | 5        | -12      | 3023.2983                    | 6        | 46       |
| 10       | 10                   | 0                    | 2920.4268                    | 5        | -13      | 3023.2983                    | 6        | 46       |
| 11       | 0                    | 11                   | 2884.6817                    |          | 117      | 2963.6819                    | 7        | 19       |
| 11       | 1                    | 11                   | 2884.6817                    |          | -63      | 2963.7089                    | 6        | 37       |
| 11       | 1                    | 10                   | 2896.9771                    | 4        | 18       | 2980.8083                    | 31       | 91       |
| 11       | 2                    | 10                   | 2896.9873                    | 8        | -44      | 2981.0467                    | 5        | -34      |
| 11       | 2                    | 9                    | 2908.3575                    | 5        | 53       | 2995.7452                    | 3        | 13       |
| 11       | 3                    | 9                    | 2908.3678                    | 11       | 7        | 2995.9818                    | 8        | -1       |
| 11       | 3                    | 8                    | 2918.6633                    | 12       | 48       | 3008.5757                    | 9        | -50      |
| 11       | 4                    | 8                    | 2918.8676                    | 12       | 38       | 3009.1777                    | 6        | -59      |
| 11       | 4                    | 7                    | 2928.1104                    | 21       | -70      | 3018.1453                    | 7        | -14      |
| 11       | 5                    | 7                    | 2928.1099                    | 2        | -91      | 3021.2120                    | 8        | -68      |
| 11       | 5                    | 6                    | 2936.5713                    | 5        | -47      | 3024.9882                    | 15       | 41       |
| 11       | 6                    | 6                    | 2937.7950                    | 5        | 81       | 3031.7632                    | 3        | -41      |
| 11       | 6                    | 5                    | 2942.7494                    | 8        | 9        | 3032.7213                    | 7        | 34       |
| 11       | 7                    | 5                    | 2948.5159                    | 9        | 110      | 3044.5844                    | 8        | -18      |
| 11       | 7                    | 4                    | 2949.8624                    | 5        | -37      | 3044.6850                    | 11       | -1       |
| 11       | 8                    | 4                    |                              |          |          | 3059.4429                    | 27       | -25      |
| 11       | 8                    | 3                    | 2961.2140                    | 4        | 96       | 3059.4429                    | 27       | -80      |
| 11       | 9                    | 3                    | 2975.9792                    | 19       | -92      | 3076.4694                    | 11       | -26      |
| 11       | 9                    | 2                    | 2975.9792                    | 19       | -93      | 3076.4694                    | 11       | -28      |
| 11       | 10                   | 2                    | 2993.2589                    | 13       | 41       | 3095.5738                    | 6        | 11       |
| 11       | 10                   | 1                    | 2993.2589                    | 13       | 39       | 3095.5738                    | 6        | 11       |
| 11       | 11                   | 1                    | 3012.7540                    | 10       | 18       | 3116.6614                    | 16       | -73      |
| 11       | 11                   | 0                    | 3012.7540                    | 10       | 18       | 3116.6614                    | 16       | -73      |
| 12       | 0                    | 12                   | 2959.8212                    |          | 18       | 3036.5178                    | 7        | 9        |
| 12       | 1                    | 12                   | 2959.8212                    |          | -79      | 3036.5178                    | 7        | -16      |
| 12       | 1                    | 11                   | 2973.3284                    |          | 51       | 3054.3470                    | 4        | 78       |
| 12       | 2                    | 11                   | 2973.3376                    | 6        | -52      | 3054.6034                    | 5        | 47       |
| 12       | 2                    | 10                   | 2985.9167                    | 11       | 61       | 3071.6435                    | 25       | 109      |
| 12       | 3                    | 10                   | 2985.9338                    | 25       | 5        | 3072.5186                    | 3        | 83       |
| 12       | 3                    | 9                    | 2997.3418                    | 25       | 30       | 3086.1502                    | 10       | -9       |
| 12       | 4                    | 9                    | 2997.4197                    | 7        | -66      | 3086.9708                    | 8        | 8        |
| 12       | 4                    | 8                    | 3007.7367                    | 44       | -13      | 3097.9029                    | 6        | -31      |
| 12       | 5                    | 8                    | 3007.6822                    | 6        | -137     | 3100.7590                    | 2        | 2        |
| 12       | 5                    | 7                    | 3017.4974                    | 2        | -11      | 3106.1032                    | 16       | 49       |
| 12       | 6                    | 7                    | 3017.8261                    | 2        | 55       | 3110.9257                    | 7        | -60      |
| 12       | 6                    | 6                    | 3025.4263                    |          | 76       | 3113.0537                    | 8        | 39       |
| 12       | 7                    | 6                    |                              |          |          | 3123.8103                    | 5        | -13      |
| 12       | 7                    | 5                    | 3032.1551                    | 11       | 40       | 3124.1340                    | 4        | 11       |
| 12       | 8                    | 5                    | 3041.3480                    | 9        | 23       | 3138.5110                    | 10       | 3        |
| 12       | 8                    | 4                    |                              |          |          | 3138.5359                    | 3        | 4        |
| 12       | 9                    | 4                    | 3055.8567                    | 9        | -13      | 3155.4137                    | 7        | 4        |
| 12       | 9                    | 3                    | 3055.9079                    | 8        | -32      | 3155.4137                    | 7        | -8       |
| 12       | 10                   | 3                    | 3072.8091                    | 2        | 17       | 3174.4558                    | 6        | 30       |
| 12       | 10                   | 2                    | 3072.8091                    | 2        | 17       | 3174.4558                    | 6        | 29       |
| 12       | 11                   | 2                    | 3092.0703                    | 3        | -9       | 3195.5317                    | 20       | 45       |
| 12       | 11                   | 1                    | 3092.0703                    | 3        | -9       | 3195.5317                    | 20       | 45       |
| 12       | 12                   | 1                    | 3113.8883                    | 18       | 18       | 3218.5465                    | 13       | 8        |
| 12       | 12                   | 0                    | 3113.8883                    | 18       | 19       | 3218.5465                    | 13       | 8        |

Table 1A (cont.)

| <i>J</i> | $(v_3 = v_4 = 1)$    |                      |                                |          |          | $(v_5 = v_9 = 1)$              |          |          |
|----------|----------------------|----------------------|--------------------------------|----------|----------|--------------------------------|----------|----------|
|          | <i>K<sub>a</sub></i> | <i>K<sub>c</sub></i> | <i>E/hc</i> , cm <sup>-1</sup> | $\Delta$ | $\delta$ | <i>E/hc</i> , cm <sup>-1</sup> | $\Delta$ | $\delta$ |
|          | 1                    |                      | 2                              | 3        | 4        | 5                              | 6        | 7        |
| 13       | 0                    | 13                   |                                |          |          | 3115.3795                      | 8        | -46      |
| 13       | 1                    | 13                   |                                |          |          | 3115.3795                      | 8        | -48      |
| 13       | 1                    | 12                   | 3055.8494                      |          | 47       | 3135.0328                      | 19       | 61       |
| 13       | 2                    | 12                   | 3055.8610                      | 11       | -53      | 3135.0530                      | 12       | 64       |
| 13       | 2                    | 11                   | 3069.6849                      | 13       | 82       | 3154.1291                      | 12       | -115     |
| 13       | 3                    | 11                   | 3069.7008                      | 14       | -33      | 3152.7998                      | 4        | -38      |
| 13       | 3                    | 10                   | 3082.2834                      | 10       | 68       | 3169.6952                      | 12       | 98       |
| 13       | 4                    | 10                   | 3082.3413                      | 10       | -16      | 3168.4473                      | 6        | 59       |
| 13       | 4                    | 9                    | 3093.7194                      | 10       | 114      | 3183.4347                      | 8        | 41       |
| 13       | 5                    | 9                    | 3093.6645                      | 2        | -54      | 3183.0466                      | 6        | 4        |
| 13       | 5                    | 8                    |                                |          |          | 3193.6424                      | 4        | 0        |
| 13       | 6                    | 8                    | 3104.3133                      | 8        | -32      | 3196.5306                      | 9        | -44      |
| 13       | 6                    | 7                    |                                |          |          | 3200.4162                      | 14       | 23       |
| 13       | 7                    | 7                    |                                |          |          | 3209.6836                      | 11       | 1        |
| 13       | 7                    | 6                    |                                |          |          | 3210.5567                      | 3        | 40       |
| 13       | 8                    | 6                    | 3128.3316                      | 5        | 4        | 3224.2563                      | 15       | 30       |
| 13       | 8                    | 5                    | 3130.0742                      | 7        | -67      | 3224.3485                      | 5        | 38       |
| 13       | 9                    | 5                    |                                |          |          | 3241.0022                      | 19       | 12       |
| 13       | 9                    | 4                    |                                |          |          | 3241.0070                      | 31       | 2        |
| 13       | 10                   | 4                    | 3159.1166                      | 4        | 27       | 3259.9556                      | 8        | 5        |
| 13       | 10                   | 3                    | 3159.1273                      | 2        | 17       | 3259.9556                      | 8        | 3        |
| 13       | 11                   | 3                    | 3178.0563                      | 4        | 26       | 3281.0047                      | 4        | -28      |
| 13       | 11                   | 2                    | 3178.0563                      | 4        | 22       | 3281.0047                      | 4        | -28      |
| 13       | 12                   | 2                    |                                |          |          | 3304.0466                      | 7        | -4       |
| 13       | 12                   | 1                    |                                |          |          | 3304.0466                      | 7        | -4       |
| 13       | 13                   | 1                    |                                |          |          | 3328.9794                      | 7        | -8       |
| 13       | 13                   | 0                    |                                |          |          | 3328.9794                      | 7        | -8       |
| 14       | 0                    | 14                   |                                |          |          | 3200.4129                      |          | -4       |
| 14       | 1                    | 14                   |                                |          |          | 3200.4129                      |          | -7       |
| 14       | 1                    | 13                   | 3144.5133                      | 2        | 23       | 3221.5077                      | 5        | 49       |
| 14       | 2                    | 13                   | 3144.5286                      | 2        | -82      | 3221.5077                      | 5        | 14       |
| 14       | 2                    | 12                   | 3159.6201                      | 7        | 31       | 3240.7164                      | 6        | -40      |
| 14       | 3                    | 12                   | 3159.6401                      | 2        | -23      |                                |          |          |
| 14       | 4                    | 11                   |                                |          |          | 3258.2753                      | 4        | -72      |
| 14       | 4                    | 10                   | 3185.9591                      | 3        | -48      | 3274.8077                      | 6        | 129      |
| 14       | 5                    | 10                   |                                |          |          | 3274.0293                      | 5        | 17       |
| 14       | 5                    | 9                    |                                |          |          | 3287.2518                      | 18       | -86      |
| 14       | 6                    | 9                    | 3197.3752                      | 7        | 58       | 3288.4552                      | 15       | 7        |
| 14       | 7                    | 8                    |                                |          |          | 3302.1380                      | 18       | -14      |
| 14       | 7                    | 7                    | 3217.8427                      | 1        | 22       |                                |          |          |
| 14       | 8                    | 7                    |                                |          |          | 3316.6831                      | 2        | 26       |
| 14       | 8                    | 6                    |                                |          |          | 3316.9638                      | 4        | -25      |
| 14       | 9                    | 6                    |                                |          |          | 3333.2535                      | 13       | -21      |
| 14       | 11                   | 4                    | 3270.7539                      | 2        | 39       |                                |          |          |
| 14       | 11                   | 3                    | 3270.7539                      | 2        | 11       |                                |          |          |
| 15       | 0                    | 15                   |                                |          |          | 3291.6903                      | 6        | -38      |
| 15       | 1                    | 15                   |                                |          |          | 3291.6903                      | 6        | -44      |
| 15       | 1                    | 14                   | 3239.2888                      | 8        | 41       | 3314.1653                      | 6        | -52      |
| 15       | 2                    | 14                   | 3239.2339                      |          | -33      | 3314.1653                      | 6        | -70      |
| 15       | 2                    | 13                   | 3255.6955                      | 5        | -43      |                                |          |          |
| 15       | 4                    | 13                   | 3255.7187                      | 10       | 69       |                                |          |          |
| 16       | 0                    | 16                   |                                |          |          | 3389.3422                      |          | -24      |
| 16       | 1                    | 16                   |                                |          |          | 3389.3422                      |          | 10       |
| 16       | 2                    | 14                   | 3357.8714                      | 10       | -34      |                                |          |          |

<sup>a)</sup> In Table 1A,  $\Delta = \{\sum_{i=1}^n (E_i - E)^2 / (n - 1)\}^{1/2} / hc$  is the experimental uncertainty of the term value, equal to one standard deviation in units of  $10^{-4}$  cm<sup>-1</sup>;  $\delta$  is the difference  $(E^{exp.} - E^{calc.}) / hc$ , also in units of  $10^{-4}$  cm<sup>-1</sup>;  $\Delta$  is not quoted when the energy value was obtained from only one transition.

Table 2A. Experimental Rovibrational Term Values for the ( $v_9 = 2$ ) and ( $v_5 = v_7 = 1$ )  
Vibrational States of the CH<sub>2</sub>D<sub>2</sub> Molecule (in cm<sup>-1</sup>)<sup>a</sup>

| <i>J</i> | $(v_3 = v_4 = 1)$    |                      |                                |          |          | $(v_5 = v_9 = 1)$              |          |          |
|----------|----------------------|----------------------|--------------------------------|----------|----------|--------------------------------|----------|----------|
|          | <i>K<sub>a</sub></i> | <i>K<sub>c</sub></i> | <i>E/hc</i> , cm <sup>-1</sup> | $\Delta$ | $\delta$ | <i>E/hc</i> , cm <sup>-1</sup> | $\Delta$ | $\delta$ |
|          | 1                    |                      | 2                              | 3        | 4        | 5                              | 6        | 7        |
| 0        | 0                    | 0                    | 2458.7952                      |          | -4       | 2422.0270                      |          | -6       |
| 1        | 0                    | 1                    | 2465.3685                      | 1        | -8       | 2428.4689                      | 2        | -6       |
| 1        | 1                    | 1                    | 2465.9160                      | 1        | -1       | 2429.8372                      |          | -17      |
| 1        | 1                    | 0                    | 2466.5905                      | 1        | -8       | 2430.1678                      | 1        | 0        |
| 2        | 0                    | 2                    | 2478.1499                      | 3        | -1       | 2441.2997                      |          | -4       |
| 2        | 1                    | 2                    | 2478.3770                      | 7        | 7        | 2442.3925                      |          | -6       |
| 2        | 1                    | 1                    | 2480.4175                      | 3        | -13      | 2443.3790                      | 20       | -16      |
| 2        | 2                    | 1                    | 2482.0287                      | 7        | -2       | 2447.4537                      | 2        | 8        |
| 2        | 2                    | 0                    | 2482.3738                      | 6        | 17       | 2447.5064                      | 6        | 3        |
| 3        | 0                    | 3                    | 2496.7646                      | 7        | 3        | 2460.4211                      | 2        | 0        |
| 3        | 1                    | 3                    | 2496.8298                      | 15       | 0        | 2461.1904                      | 3        | -15      |
| 3        | 1                    | 2                    | 2500.8337                      | 3        | -8       | 2463.1638                      | 14       | 8        |
| 3        | 2                    | 2                    | 2501.7764                      | 2        | 5        | 2466.7765                      | 7        | 0        |
| 3        | 2                    | 1                    | 2503.1371                      | 3        | -11      | 2467.0345                      | 9        | 1        |
| 3        | 3                    | 1                    | 2506.1880                      | 5        | 4        | 2474.3161                      | 11       | 27       |
| 3        | 3                    | 0                    | 2506.3121                      | 2        | -4       | 2474.3208                      |          | 18       |
| 4        | 0                    | 4                    | 2521.1064                      | 8        | 16       | 2485.7201                      | 1        | -4       |
| 4        | 1                    | 4                    | 2521.1217                      | 6        | 13       | 2486.2012                      | 2        | -15      |
| 4        | 1                    | 3                    | 2527.3731                      | 8        | 0        | 2489.4653                      | 12       | 27       |
| 4        | 2                    | 3                    | 2527.7741                      | 3        | 7        | 2492.4961                      | 1        | -3       |
| 4        | 2                    | 2                    | 2530.8573                      | 2        | 0        | 2493.2214                      | 8        | -5       |
| 4        | 3                    | 2                    | 2533.0485                      | 4        | -31      | 2500.1685                      | 3        | 3        |
| 4        | 3                    | 1                    | 2533.7331                      | 6        | 7        | 2500.2076                      | 10       | 3        |
| 4        | 4                    | 1                    | 2538.2735                      | 4        | 16       | 2510.4102                      | 35       | 19       |
| 4        | 4                    | 0                    | 2538.3054                      | 8        | -3       | 2510.4102                      | 35       | 13       |
| 5        | 0                    | 5                    | 2551.1428                      | 4        | 15       | 2517.1179                      | 7        | -11      |
| 5        | 1                    | 5                    | 2551.1462                      | 8        | 15       | 2517.3898                      |          | -26      |
| 5        | 1                    | 4                    | 2559.6630                      | 8        | 8        | 2522.1981                      | 7        | 19       |
| 5        | 2                    | 4                    | 2559.7928                      | 9        | 10       | 2524.5743                      | 13       | -4       |
| 5        | 2                    | 3                    | 2565.1312                      | 16       | -66      | 2526.1066                      | 9        | 2        |
| 5        | 3                    | 3                    | 2566.3722                      | 4        | -3       | 2532.4978                      | 18       | -29      |
| 5        | 3                    | 2                    | 2568.3847                      | 6        | 22       | 2532.6511                      | 6        | -16      |
| 5        | 4                    | 2                    | 2572.0811                      | 6        | 30       | 2542.7260                      | 3        | 10       |
| 5        | 4                    | 1                    |                                |          |          | 2542.7307                      | 7        | 11       |
| 5        | 5                    | 1                    | 2578.1103                      | 5        | -3       | 2555.6318                      | 13       | 45       |
| 5        | 5                    | 0                    | 2578.1204                      | 4        | -9       | 2555.6318                      | 13       | 46       |
| 6        | 0                    | 6                    | 2586.8489                      | 9        | 3        | 2554.5839                      | 11       | -27      |
| 6        | 1                    | 6                    | 2586.8496                      | 9        | 2        | 2554.7287                      | 7        | -24      |
| 6        | 1                    | 5                    | 2597.6035                      | 5        | 6        | 2561.2522                      | 5        | 41       |
| 6        | 2                    | 5                    | 2597.6385                      | 6        | -2       | 2562.9623                      |          | -37      |
| 6        | 2                    | 4                    | 2605.4362                      | 11       | -25      | 2565.6608                      | 4        | -1       |
| 6        | 3                    | 4                    | 2605.9812                      | 6        | -7       | 2571.2974                      | 9        | -22      |
| 6        | 3                    | 3                    | 2610.0259                      | 18       | -68      | 2571.7292                      | 4        | -32      |
| 6        | 4                    | 3                    | 2612.5889                      | 17       | 19       | 2581.5243                      |          | -115     |
| 6        | 4                    | 2                    | 2613.6278                      | 2        | 20       | 2581.5584                      | 19       | -3       |
| 6        | 5                    | 2                    | 2618.8253                      | 10       | 21       | 2594.3918                      | 9        | 17       |
| 6        | 5                    | 1                    | 2618.9504                      | 7        | 81       | 2594.3918                      | 9        | 17       |
| 6        | 6                    | 1                    | 2625.7017                      | 10       | -22      | 2609.8489                      | 20       | 65       |
| 6        | 6                    | 0                    | 2625.7017                      | 10       | -48      | 2609.8489                      | 20       | -75      |
| 7        | 0                    | 7                    | 2628.2191                      | 7        | 6        | 2598.1197                      | 17       | -21      |
| 7        | 1                    | 7                    | 2628.2191                      | 7        | -5       | 2598.1911                      | 4        | -38      |
| 7        | 1                    | 6                    | 2641.1820                      | 7        | 1        | 2606.4898                      | 10       | 41       |
| 7        | 2                    | 6                    | 2641.1907                      | 15       | -31      | 2607.6208                      | 4        | 3        |
| 7        | 2                    | 5                    | 2651.4062                      | 12       | -35      | 2611.8098                      | 4        | 11       |
| 7        | 3                    | 5                    | 2651.5958                      | 17       | -3       | 2616.5354                      | 7        | -32      |
| 7        | 3                    | 4                    | 2658.1376                      | 3        | -11      | 2617.5269                      | 10       | -30      |
| 7        | 4                    | 4                    | 2659.6136                      | 12       | 33       | 2626.8474                      |          | -21      |
| 7        | 4                    | 3                    | 2662.2059                      | 3        | 45       | 2626.9300                      | 11       | -7       |

Table 2A (cont.)

| $J$ | $(v_3 = v_4 = 1)$ |       |                        |          |          | $(v_5 = v_9 = 1)$      |          |          |
|-----|-------------------|-------|------------------------|----------|----------|------------------------|----------|----------|
|     | $K_a$             | $K_c$ | $E/hc, \text{cm}^{-1}$ | $\Delta$ | $\delta$ | $E/hc, \text{cm}^{-1}$ | $\Delta$ | $\delta$ |
|     | 1                 |       | 2                      | 3        | 4        | 5                      | 6        | 7        |
| 7   | 5                 | 3     | 2666.3556              | 11       | 66       | 2639.6453              | 4        | 10       |
| 7   | 5                 | 2     | 2666.8526              | 6        | 84       | 2639.6483              | 6        | 40       |
| 7   | 6                 | 2     |                        |          |          | 2655.0564              | 10       | 10       |
| 7   | 6                 | 1     |                        |          |          | 2655.0564              | 10       | -34      |
| 7   | 7                 | 1     | 2681.2269              |          | -38      | 2672.8211              |          | -99      |
| 7   | 7                 | 0     | 2681.2269              |          | -45      | 2672.8211              |          | 6        |
| 8   | 0                 | 8     | 2675.2591              | 23       | -4       | 2647.7259              | 3        | -35      |
| 8   | 1                 | 8     | 2675.2591              | 23       | 5        | 2647.7597              | 10       | -56      |
| 8   | 1                 | 7     | 2690.3914              | 5        | -23      | 2657.8026              | 18       | 32       |
| 8   | 2                 | 7     | 2690.3932              | 8        | 68       | 2658.4893              | 5        | 8        |
| 8   | 2                 | 6     | 2702.9400              | 5        | -69      | 2664.4397              | 10       | 15       |
| 8   | 3                 | 6     | 2702.9953              | 8        | -17      | 2668.1758              | 15       | -15      |
| 8   | 3                 | 5     | 2712.2154              | 5        | -25      | 2670.0920              | 18       | -24      |
| 8   | 4                 | 5     | 2712.8844              | 5        | 7        | 2678.6667              | 11       | -2       |
| 8   | 4                 | 4     | 2717.7031              | 1        | 39       | 2678.9012              | 20       | -32      |
| 8   | 5                 | 4     |                        |          |          | 2691.4043              | 5        | 23       |
| 8   | 5                 | 3     |                        |          |          | 2691.4185              | 20       | -73      |
| 9   | 0                 | 9     | 2727.9897              | 18       | 0        | 2703.4070              | 16       | -38      |
| 9   | 1                 | 9     | 2727.9897              | 18       | 22       | 2703.4239              | 19       | -42      |
| 9   | 1                 | 8     | 2745.2447              | 8        | -27      | 2715.1380              | 6        | 46       |
| 9   | 2                 | 8     | 2745.2442              | 2        | 5        | 2715.5253              | 6        | 11       |
| 9   | 2                 | 7     | 2760.0389              | 28       | 90       | 2723.4099              | 10       | 24       |
| 9   | 3                 | 7     | 2760.0544              | 6        | 5        | 2726.1581              | 4        | -43      |
| 9   | 3                 | 6     |                        |          |          | 2729.4045              | 24       | -4       |
| 9   | 4                 | 6     | 2772.1141              | 16       | 1        | 2736.9752              | 5        | -7       |
| 9   | 4                 | 5     | 2779.6594              | 5        | 2        | 2737.5510              | 5        | -21      |
| 9   | 5                 | 5     |                        |          |          | 2749.6786              | 21       | 48       |
| 9   | 5                 | 4     |                        |          |          | 2749.7235              | 12       | 2        |
| 9   | 6                 | 4     |                        |          |          | 2764.9414              | 10       | 25       |
| 9   | 6                 | 3     |                        |          |          | 2764.9340              | 12       | -84      |
| 10  | 0                 | 10    | 2786.4175              | 16       | -33      | 2765.1614              | 3        | -10      |
| 10  | 1                 | 10    | 2786.4175              | 16       | -24      | 2765.1717              |          | 10       |
| 10  | 1                 | 9     | 2805.7603              | 13       | -31      | 2778.4799              | 28       | 18       |
| 10  | 2                 | 9     | 2805.7586              | 12       | -4       | 2778.6909              | 10       | 15       |
| 10  | 2                 | 8     | 2822.7242              | 26       | -76      | 2788.5687              | 8        | 61       |
| 10  | 3                 | 8     | 2822.7242              | 26       | -37      | 2790.4426              | 5        | 3        |
| 10  | 3                 | 7     | 2836.9794              | 7        | -63      | 2795.3694              | 7        | -36      |
| 10  | 4                 | 7     | 2837.0557              | 2        | 6        | 2801.7486              | 8        | 3        |
| 10  | 4                 | 6     | 2847.2287              | 10       | -34      | 2802.9576              | 18       | -81      |
| 10  | 5                 | 6     |                        |          |          | 2814.4697              | 3        | 96       |
| 10  | 5                 | 5     |                        |          |          | 2814.6018              | 10       | 21       |
| 10  | 6                 | 5     |                        |          |          | 2829.6412              | 18       | 5        |
| 10  | 6                 | 4     |                        |          |          | 2829.6383              | 15       | -41      |
| 10  | 7                 | 3     |                        |          |          | 2847.4012              | 3        | 45       |
| 11  | 0                 | 11    | 2850.5846              | 6        | 21       | 2832.9816              | 11       | 58       |
| 11  | 1                 | 11    | 2850.5846              | 6        | 24       | 2832.9816              | 11       | 17       |
| 11  | 1                 | 10    |                        |          |          | 2847.8459              | 10       | 31       |
| 11  | 2                 | 10    | 2871.9597              | 5        | 16       | 2847.9549              | 10       | 13       |
| 11  | 2                 | 9     | 2891.0265              | 12       | -39      | 2859.7608              | 2        | 30       |
| 11  | 3                 | 9     | 2891.0265              | 12       | 13       | 2860.9442              | 3        | -19      |
| 11  | 3                 | 8     | 2907.5618              | 6        | -41      | 2867.8557              | 4        | -62      |
| 11  | 4                 | 8     | 2907.5827              | 3        | 24       | 2872.9677              | 8        | 95       |
| 11  | 4                 | 7     |                        |          |          | 2875.1981              | 15       | -9       |
| 11  | 5                 | 7     |                        |          |          | 2885.8043              | 14       | 2        |
| 11  | 6                 | 6     |                        |          |          | 2900.8630              | 7        | 4        |
| 11  | 6                 | 5     |                        |          |          | 2900.8714              | 11       | -2       |
| 11  | 7                 | 4     |                        |          |          | 2918.2480              | 3        | -1       |



Table 2A (cont.)

| $J$ | $K_a$ | $K_c$ | $(v_3 = v_4 = 1)$      |          |          | $(v_5 = v_9 = 1)$      |          |          |
|-----|-------|-------|------------------------|----------|----------|------------------------|----------|----------|
|     |       |       | $E/hc, \text{cm}^{-1}$ | $\Delta$ | $\delta$ | $E/hc, \text{cm}^{-1}$ | $\Delta$ | $\delta$ |
|     | 1     |       | 2                      | 3        | 4        | 5                      | 6        | 7        |
| 12  | 0     | 12    | 2920.4933              | 13       | 16       |                        |          |          |
| 12  | 1     | 12    | 2920.4933              | 13       | 18       |                        |          |          |
| 12  | 1     | 11    | 2943.8534              | 14       | -53      | 2923.2361              | 3        | -2       |
| 12  | 2     | 11    | 2943.8534              | 14       | -49      | 2923.2922              | 15       | -13      |
| 12  | 2     | 10    | 2964.9859              | 39       | 62       | 2936.9155              | 16       | -17      |
| 12  | 3     | 10    | 2964.9859              | 39       | 114      | 2937.6174              | 17       | -36      |
| 12  | 3     | 9     | 2983.6740              | 15       | 5        | 2946.7096              | 5        | 45       |
| 12  | 4     | 9     | 2983.6783              | 11       | 26       | 2950.5083              | 7        | 35       |
| 12  | 4     | 8     |                        |          |          | 2954.2306              | 8        | -52      |
| 12  | 5     | 8     |                        |          |          | 2963.6109              | 9        | -44      |
| 12  | 5     | 7     |                        |          |          | 2964.3308              | 3        | 49       |
| 12  | 6     | 7     |                        |          |          | 2978.6102              | 5        | -21      |
| 13  | 1     | 12    | 3021.4846              | 9        | -11      | 3004.6578              | 4        | -30      |
| 13  | 2     | 12    | 3021.4846              | 9        | -14      | 3004.6844              | 8        | 31       |
| 13  | 2     | 11    | 3044.6153              | 18       | 69       | 3020.0148              | 5        | -32      |
| 13  | 3     | 11    | 3044.6153              | 18       | 63       | 3020.4086              | 21       | -71      |
| 13  | 3     | 10    |                        |          |          | 3031.7078              | 1        | -17      |
| 13  | 4     | 10    | 3065.3729              | 6        | -70      | 3034.3560              | 17       | 8        |
| 13  | 4     | 9     |                        |          |          | 3039.9584              | 3        | -48      |
| 13  | 5     | 9     |                        |          |          | 3047.9218              | 18       | 93       |
| 13  | 5     | 8     |                        |          |          | 3049.3447              | 9        | 21       |
| 13  | 6     | 8     |                        |          |          | 3062.8849              | 5        | -36      |
| 14  | 1     | 13    | 3104.8567              | 8        | -2       | 3092.1092              |          | -65      |
| 14  | 2     | 13    | 3104.8567              | 8        | 27       |                        |          |          |
| 14  | 2     | 12    | 3129.9885              | 8        | 9        | 3109.0651              | 5        | -37      |
| 14  | 3     | 12    | 3129.9885              | 8        | -12      | 3109.2792              |          | -105     |
| 14  | 3     | 11    |                        |          |          | 3122.7113              | 9        | 7        |
| 14  | 4     | 11    |                        |          |          | 3124.4305              | 9        | 36       |
| 15  | 1     | 14    | 3193.9942              | 15       | 29       |                        |          |          |
| 15  | 2     | 14    | 3193.9942              | 15       | -55      |                        |          |          |
| 15  | 2     | 13    |                        |          |          | 3204.0847              | 16       | 41       |
| 15  | 3     | 13    |                        |          |          | 3204.1980              | 10       | 22       |
| 15  | 3     | 12    |                        |          |          | 3219.6101              | 13       | 139      |
| 15  | 4     | 12    |                        |          |          | 3220.6380              | 10       | -76      |
| 15  | 4     | 11    |                        |          |          | 3230.8887              | 5        | -39      |

<sup>a)</sup> See footnote to Table 1A.

Table 3A. List of Transitions Belonging to the  $\nu_3 + \nu_7$  Band of CH<sub>2</sub>D<sub>2</sub>.

| Upper |        |        | Lower |       |       | Line position, Intensity, |              | $E^{exp.}$ ,        | Mean value E,        | $E^{calc.}$ ,       | $\delta$ ,                 |
|-------|--------|--------|-------|-------|-------|---------------------------|--------------|---------------------|----------------------|---------------------|----------------------------|
| $J'$  | $K'_a$ | $K'_c$ | $J$   | $K_a$ | $K_c$ | in $\text{cm}^{-1}$       | $\ln(I_0/I)$ | in $\text{cm}^{-1}$ | in $\text{cm}^{-1}$  | in $\text{cm}^{-1}$ | in $10^{-4}\text{cm}^{-1}$ |
| 1     |        |        | 2     |       |       | 3                         | 4            | 5                   | 6                    | 7                   | 8                          |
| 8     | 6      | 2      | 7     | 1     | 6     | 2617.9793                 | 0.30         | 2803.3497           |                      |                     |                            |
| 8     | 6      | 2      | 8     | 3     | 6     | 2557.5415                 | 0.51         | 2803.3497           |                      |                     |                            |
| 8     | 6      | 2      | 9     | 3     | 6     | 2491.8575                 | 0.42         | 2803.3491           | 2803.3496            | 2803.3466           | 30                         |
| 8     | 6      | 2      | 8     | 5     | 4     | 2540.2340                 | 0.10         | 2803.3497           | 0.0003 <sup>a)</sup> |                     |                            |
| 8     | 6      | 2      | 9     | 1     | 8     | 2509.8482                 | 0.15         | 2803.3497           |                      |                     |                            |
| 9     | 5      | 4      | 8     | 0     | 8     | 2624.4592                 | 0.40         | 2849.8796           |                      |                     |                            |
| 9     | 5      | 4      | 9     | 2     | 8     | 2556.3625                 | 1.54         | 2849.8802           |                      |                     |                            |
| 9     | 5      | 4      | 10    | 2     | 8     | 2481.1579                 | 0.55         | 2849.8805           | 2849.8802            | 2849.8809           | -7                         |
| 9     | 5      | 4      | 10    | 0     | 10    | 2507.2635                 | 0.14         | 2849.8800           | 0.0004 <sup>a)</sup> |                     |                            |
| 9     | 5      | 4      | 9     | 4     | 6     | 2536.2793                 | 0.13         | 2849.8804           |                      |                     |                            |
| 9     | 5      | 4      | 10    | 4     | 6     | 2465.3790                 | 0.09         | 2849.8807           |                      |                     |                            |
| 12    | 8      | 5      | 11    | 5     | 7     | 2655.3377                 | 0.50         | 3117.2972           |                      |                     |                            |
| 12    | 8      | 5      | 12    | 5     | 7     | 2571.1678                 | 0.26         | 3117.2983           | 3117.2980            | 3117.2982           | -2                         |
| 12    | 8      | 5      | 13    | 7     | 7     | 2466.4631                 | 0.87         | 3117.2972           | 0.0010 <sup>a)</sup> |                     |                            |
| 12    | 8      | 5      | 13    | 5     | 9     | 2490.6276                 | 0.08         | 3117.2994           |                      |                     |                            |
| 12    | 3      | 9      | 11    | 0     | 11    | 2646.4176                 | 0.10         | 3056.7246           |                      |                     |                            |
| 12    | 3      | 9      | 12    | 2     | 11    | 2555.6827                 | 1.08         | 3056.7310           |                      |                     |                            |
| 12    | 3      | 9      | 13    | 2     | 11    | 2457.7470                 | 0.15         | 3056.7250           | 3056.7247            | 3056.7213           | 34                         |
| 12    | 3      | 9      | 11    | 2     | 9     | 2617.2602                 | 0.67         | 3056.7239           | 0.0004 <sup>a)</sup> |                     |                            |
| 12    | 3      | 9      | 13    | 4     | 9     | 2431.1007                 | 0.29         | 3056.7248           |                      |                     |                            |
| 12    | 3      | 9      | 13    | 0     | 13    | 2492.8899                 | 0.11         | 3056.7247           |                      |                     |                            |
| 12    | 7      | 6      | 11    | 4     | 8     | 2646.6162                 | 0.39         | 3097.9843           |                      |                     |                            |
| 12    | 7      | 6      | 12    | 4     | 8     | 2558.7507                 | 0.37         | 3097.9843           |                      |                     |                            |
| 12    | 7      | 6      | 13    | 4     | 10    | 2484.2324                 | 0.27         | 3097.9833           | 3097.9845            | 3097.9912           | -67                        |
| 12    | 7      | 6      | 12    | 6     | 6     | 2544.3400                 | 0.19         | 3097.9848           | 0.0007 <sup>a)</sup> |                     |                            |
| 12    | 7      | 6      | 13    | 8     | 6     | 2433.0552                 | 0.32         | 3097.9855           |                      |                     |                            |
| 12    | 5      | 8      | 11    | 2     | 10    | 2643.9367                 | 0.22         | 3069.7587           |                      |                     |                            |
| 12    | 5      | 8      | 12    | 2     | 10    | 2553.5457                 | 1.95         | 3069.7587           |                      |                     |                            |
| 12    | 5      | 8      | 13    | 4     | 10    | 2456.0080                 | 0.29         | 3069.7589           | 3069.7588            | 3069.7667           | -79                        |
| 12    | 5      | 8      | 13    | 2     | 12    | 2487.4479                 | 0.13         | 3069.7597           | 0.0008 <sup>a)</sup> |                     |                            |
| 12    | 5      | 8      | 11    | 4     | 8     | 2618.3892                 | 0.27         | 3069.7573           |                      |                     |                            |

<sup>a)</sup>  $\Delta = \{\sum_{i=1}^n (E_i - E)^2 / (n - 1)\}^{1/2} / hc$  in units of  $\text{cm}^{-1}$ .
