# Supplementary material for: High resolution Fourier transform spectroscopy of CH2D2in the region 2350–2650 cm−1: the bands ν5+ ν7, 2ν9, ν3+ ν4, ν3+ ν7and ν5+ ν9
Source: Royal Society of Chemistry journal article supplement (doi:10.1039/b414879g), 2005-01-01
Supplement: b414879g-e2.pdf [file b414879g-e2.pdf]

## Appendix B:

### List of Experimental Assigned Transitions.

Electronic supplementary materials to:

High Resolution Fourier Transform Spectroscopy of  
CH<sub>2</sub>D<sub>2</sub> in the Region 2350 - 2650 cm<sup>-1</sup>:

The Bands  $\nu_5 + \nu_7$ ,  $2\nu_9$ ,  $\nu_3 + \nu_4$ ,  $\nu_3 + \nu_7$ , and  $\nu_5 + \nu_9$

O. N. Ulenikov, E. S. Bekhtereva, S. V. Grebneva

Laboratory of Molecular Spectroscopy, Physics Department,  
Tomsk State University, Tomsk, 634050, Russia,  
and Institute of Atmospheric Optics SB RAN, Tomsk, 634055, Russia

H. Hollenstein, M. Quack

Physical Chemistry, ETH-Zürich,  
CH-8093 Zürich, Switzerland

(I) Observed wavenumbers (in cm<sup>-1</sup>).

(II) Intensity (in  $\ln(I_0/I)$ ).

(III)  $\tilde{\nu}_{exp.} - \tilde{\nu}_{calc.}$  (in cm<sup>-1</sup>).

(IV) Band assignment.

(V) Quantum numbers of upper ro-vibrational state,  $J'$ ,  $K'_a$ ,  $K'_c$ .

(VI) Quantum numbers of lower ro-vibrational state,  $J$ ,  $K_a$ ,  $K_c$ .

Observed and Calculated Allowed Transition Wavenumbers in the  $\nu_3 + \nu_4$ ,  $\nu_5 + \nu_9$ ,  $\nu_5 + \nu_7$ , and  $2\nu_9$  Bands of CH<sub>2</sub>D<sub>2</sub>.

| (I)       | (II) | (III)                  | (IV)            | (V)     | (VI)    | (I)       | (II) | (III)                  | (IV)            | (V)     | (VI)    |
|-----------|------|------------------------|-----------------|---------|---------|-----------|------|------------------------|-----------------|---------|---------|
| 2272.1687 | 3.25 | $0.14 \times 10^{-2}$  | $\nu_5 + \nu_7$ | 15 13 2 | 16 15 1 | 2331.7694 | 4.39 | $-0.39 \times 10^{-2}$ | $2\nu_9$        | 15 2 14 | 16 1 15 |
| 2272.1687 | 3.25 | $-0.20 \times 10^{-2}$ | $\nu_5 + \nu_7$ | 15 13 3 | 16 15 2 | 2331.7694 | 4.39 | $0.44 \times 10^{-2}$  | $2\nu_9$        | 15 1 14 | 16 2 15 |
| 2276.4567 | 2.25 | $-0.12 \times 10^{-2}$ | $\nu_5 + \nu_7$ | 15 11 4 | 16 13 3 | 2332.6961 | 2.09 | $0.12 \times 10^{-2}$  | $\nu_5 + \nu_7$ | 10 8 3  | 11 10 2 |
| 2283.0018 | 0.91 | $-0.11 \times 10^{-3}$ | $\nu_5 + \nu_7$ | 15 0 15 | 16 2 14 | 2332.6961 | 2.09 | $0.43 \times 10^{-2}$  | $\nu_5 + \nu_7$ | 10 8 2  | 11 10 1 |
| 2284.3505 | 4.87 | $0.47 \times 10^{-3}$  | $\nu_5 + \nu_7$ | 15 2 13 | 16 4 12 | 2332.8527 | 0.61 | $0.29 \times 10^{-2}$  | $\nu_5 + \nu_7$ | 14 8 6  | 15 8 7  |
| 2285.5386 | 1.59 | $0.24 \times 10^{-2}$  | $\nu_5 + \nu_7$ | 15 4 12 | 16 6 11 | 2333.9625 | 1.54 | $0.37 \times 10^{-2}$  | $\nu_5 + \nu_7$ | 10 9 1  | 11 11 0 |
| 2287.9393 | 6.58 | $0.36 \times 10^{-3}$  | $\nu_5 + \nu_7$ | 15 6 10 | 16 8 9  | 2333.9625 | 1.54 | $0.37 \times 10^{-2}$  | $\nu_5 + \nu_7$ | 10 9 2  | 11 11 1 |
| 2289.2379 | 2.36 | $-0.24 \times 10^{-2}$ | $\nu_5 + \nu_7$ | 12 3 9  | 13 5 8  | 2334.3521 | 3.38 | $0.16 \times 10^{-3}$  | $2\nu_9$        | 11 0 11 | 12 3 10 |
| 2289.3290 | 5.32 | $-0.27 \times 10^{-2}$ | $\nu_5 + \nu_7$ | 15 7 8  | 16 9 7  | 2334.3716 | 0.26 | $0.24 \times 10^{-2}$  | $2\nu_9$        | 11 1 11 | 12 2 10 |
| 2290.5526 | 0.95 | $-0.13 \times 10^{-2}$ | $\nu_5 + \nu_7$ | 15 9 6  | 16 11 5 | 2334.6157 | 0.46 | $0.17 \times 10^{-2}$  | $\nu_3 + \nu_4$ | 11 7 5  | 12 10 2 |
| 2291.4367 | 0.61 | $-0.42 \times 10^{-2}$ | $2\nu_9$        | 15 2 14 | 16 3 13 | 2334.6157 | 0.46 | $0.77 \times 10^{-3}$  | $2\nu_9$        | 9 7 2   | 10 10 1 |
| 2291.8311 | 0.69 | $-0.51 \times 10^{-2}$ | $\nu_5 + \nu_7$ | 14 3 11 | 15 3 12 | 2335.0825 | 0.70 | $0.39 \times 10^{-2}$  | $\nu_5 + \nu_7$ | 13 2 12 | 14 2 13 |
| 2291.8311 | 0.69 | $0.10 \times 10^{-2}$  | $\nu_5 + \nu_7$ | 14 2 13 | 15 4 12 | 2335.4969 | 4.86 | $-0.25 \times 10^{-2}$ | $\nu_5 + \nu_7$ | 14 1 14 | 15 1 15 |
| 2293.2249 | 0.62 | $0.33 \times 10^{-2}$  | $\nu_5 + \nu_7$ | 14 3 12 | 15 5 11 | 2335.9609 | 4.34 | $-0.45 \times 10^{-2}$ | $\nu_5 + \nu_7$ | 11 4 7  | 12 4 8  |
| 2296.6735 | 0.41 | $-0.20 \times 10^{-2}$ | $\nu_5 + \nu_7$ | 14 6 8  | 15 8 7  | 2336.1553 | 2.15 | $-0.46 \times 10^{-2}$ | $\nu_5 + \nu_7$ | 9 2 8   | 10 4 7  |
| 2296.6735 | 0.41 | $-0.63 \times 10^{-3}$ | $\nu_5 + \nu_7$ | 14 6 9  | 15 8 8  | 2336.6807 | 3.56 | $0.24 \times 10^{-2}$  | $\nu_3 + \nu_4$ | 15 2 14 | 16 3 13 |
| 2297.6268 | 3.35 | $0.96 \times 10^{-3}$  | $\nu_5 + \nu_7$ | 13 12 2 | 14 14 1 | 2336.7583 | 0.26 | $0.44 \times 10^{-2}$  | $\nu_5 + \nu_7$ | 12 4 9  | 13 4 10 |
| 2297.9256 | 5.39 | $-0.21 \times 10^{-2}$ | $\nu_5 + \nu_7$ | 14 7 7  | 15 9 6  | 2336.9377 | 0.28 | $-0.58 \times 10^{-2}$ | $\nu_5 + \nu_7$ | 12 5 8  | 13 5 9  |
| 2298.6365 | 0.54 | $0.33 \times 10^{-2}$  | $\nu_5 + \nu_7$ | 12 10 3 | 13 12 2 | 2336.9607 | 3.18 | $0.31 \times 10^{-2}$  | $\nu_5 + \nu_7$ | 9 1 8   | 10 3 7  |
| 2298.9542 | 0.52 | $-0.37 \times 10^{-2}$ | $\nu_5 + \nu_7$ | 13 1 13 | 14 3 12 | 2337.0227 | 0.34 | $-0.43 \times 10^{-2}$ | $\nu_5 + \nu_7$ | 9 3 7   | 10 5 6  |
| 2299.2613 | 0.74 | $-0.18 \times 10^{-2}$ | $\nu_5 + \nu_7$ | 14 8 6  | 15 10 5 | 2337.0594 | 0.62 | $-0.24 \times 10^{-2}$ | $\nu_5 + \nu_7$ | 13 1 13 | 14 1 14 |
| 2301.3538 | 3.90 | $-0.54 \times 10^{-3}$ | $2\nu_9$        | 10 6 4  | 11 7 5  | 2337.2114 | 2.30 | $0.66 \times 10^{-3}$  | $\nu_3 + \nu_4$ | 14 11 4 | 15 12 3 |
| 2305.7726 | 0.49 | $0.52 \times 10^{-2}$  | $\nu_5 + \nu_7$ | 15 5 10 | 16 5 11 | 2337.2114 | 2.30 | $-0.22 \times 10^{-2}$ | $\nu_3 + \nu_4$ | 14 11 3 | 15 12 4 |
| 2306.4973 | 4.63 | $0.33 \times 10^{-2}$  | $\nu_5 + \nu_7$ | 13 7 7  | 14 9 6  | 2337.2114 | 2.30 | $-0.51 \times 10^{-2}$ | $2\nu_9$        | 13 4 10 | 14 5 9  |
| 2306.5610 | 2.57 | $-0.53 \times 10^{-2}$ | $\nu_5 + \nu_7$ | 14 4 10 | 15 4 11 | 2337.4612 | 5.58 | $0.14 \times 10^{-2}$  | $\nu_5 + \nu_7$ | 9 5 5   | 10 7 4  |
| 2307.8115 | 0.93 | $-0.69 \times 10^{-3}$ | $\nu_5 + \nu_7$ | 13 8 5  | 14 10 4 | 2337.5038 | 3.65 | $0.54 \times 10^{-2}$  | $\nu_5 + \nu_7$ | 9 5 4   | 10 7 3  |
| 2309.5431 | 3.30 | $0.49 \times 10^{-3}$  | $\nu_5 + \nu_7$ | 12 2 11 | 13 4 10 | 2338.4290 | 0.31 | $-0.15 \times 10^{-2}$ | $\nu_5 + \nu_7$ | 14 11 3 | 15 11 4 |
| 2309.5963 | 1.60 | $-0.70 \times 10^{-4}$ | $\nu_5 + \nu_7$ | 12 3 9  | 13 3 10 | 2338.4290 | 0.31 | $-0.53 \times 10^{-3}$ | $\nu_5 + \nu_7$ | 14 11 4 | 15 11 5 |
| 2310.4183 | 2.04 | $-0.59 \times 10^{-2}$ | $\nu_5 + \nu_7$ | 15 14 1 | 16 14 2 | 2338.7757 | 1.74 | $0.33 \times 10^{-2}$  | $\nu_5 + \nu_7$ | 9 3 6   | 10 5 5  |
| 2313.0512 | 0.81 | $0.12 \times 10^{-2}$  | $\nu_5 + \nu_7$ | 12 5 7  | 13 7 6  | 2339.2215 | 5.16 | $-0.84 \times 10^{-3}$ | $\nu_5 + \nu_7$ | 9 7 3   | 10 9 2  |
| 2313.6873 | 3.09 | $-0.75 \times 10^{-3}$ | $\nu_5 + \nu_7$ | 12 6 6  | 13 8 5  | 2339.9720 | 3.53 | $-0.51 \times 10^{-2}$ | $\nu_5 + \nu_7$ | 11 5 6  | 12 5 7  |
| 2314.1546 | 1.49 | $0.68 \times 10^{-2}$  | $2\nu_9$        | 14 3 12 | 15 4 11 | 2339.9850 | 2.48 | $-0.68 \times 10^{-2}$ | $\nu_3 + \nu_4$ | 10 7 4  | 11 10 1 |
| 2315.8653 | 1.64 | $0.27 \times 10^{-2}$  | $\nu_5 + \nu_7$ | 15 5 11 | 16 5 12 | 2340.4058 | 0.95 | $-0.33 \times 10^{-2}$ | $\nu_3 + \nu_4$ | 10 7 3  | 11 10 2 |
| 2316.7456 | 0.62 | $-0.38 \times 10^{-2}$ | $\nu_5 + \nu_7$ | 11 1 11 | 12 3 10 | 2340.7590 | 0.65 | $0.22 \times 10^{-2}$  | $\nu_5 + \nu_7$ | 9 8 2   | 10 10 1 |
| 2316.7625 | 4.33 | $-0.37 \times 10^{-3}$ | $\nu_5 + \nu_7$ | 11 0 11 | 12 2 10 | 2340.7590 | 0.65 | $0.26 \times 10^{-2}$  | $\nu_5 + \nu_7$ | 9 8 1   | 10 10 0 |
| 2317.0362 | 1.25 | $-0.10 \times 10^{-2}$ | $\nu_5 + \nu_7$ | 15 3 12 | 16 3 13 | 2340.9280 | 5.02 | $-0.33 \times 10^{-2}$ | $\nu_5 + \nu_7$ | 14 5 9  | 15 3 12 |
| 2317.5065 | 0.83 | $-0.47 \times 10^{-2}$ | $2\nu_9$        | 13 2 12 | 14 3 11 | 2340.9820 | 2.40 | $0.24 \times 10^{-3}$  | $\nu_5 + \nu_7$ | 12 2 11 | 13 2 12 |
| 2317.8621 | 3.80 | $0.24 \times 10^{-2}$  | $\nu_5 + \nu_7$ | 12 8 5  | 13 10 4 | 2341.9452 | 2.77 | $0.24 \times 10^{-2}$  | $2\nu_9$        | 14 2 13 | 15 1 14 |
| 2319.0143 | 4.29 | $-0.88 \times 10^{-3}$ | $\nu_3 + \nu_4$ | 11 9 3  | 12 12 0 | 2341.9452 | 2.77 | $-0.47 \times 10^{-3}$ | $2\nu_9$        | 14 1 13 | 15 2 14 |
| 2319.0143 | 4.29 | $-0.10 \times 10^{-2}$ | $\nu_3 + \nu_4$ | 11 9 2  | 12 12 1 | 2342.0379 | 0.68 | $-0.13 \times 10^{-2}$ | $\nu_5 + \nu_7$ | 13 8 5  | 14 8 6  |
| 2320.6149 | 0.53 | $0.26 \times 10^{-2}$  | $\nu_5 + \nu_7$ | 11 4 8  | 12 6 7  | 2342.1469 | 4.04 | $-0.15 \times 10^{-2}$ | $\nu_5 + \nu_7$ | 13 8 6  | 14 8 7  |
| 2322.8949 | 0.26 | $0.15 \times 10^{-2}$  | $\nu_5 + \nu_7$ | 15 11 4 | 16 11 5 | 2342.4460 | 6.61 | $0.62 \times 10^{-2}$  | $\nu_3 + \nu_4$ | 11 6 6  | 12 9 3  |
| 2323.6885 | 2.15 | $0.26 \times 10^{-2}$  | $\nu_5 + \nu_7$ | 14 6 9  | 15 6 10 | 2342.7001 | 1.15 | $-0.33 \times 10^{-2}$ | $2\nu_9$        | 11 2 10 | 12 3 9  |
| 2324.1310 | 1.88 | $0.28 \times 10^{-2}$  | $\nu_5 + \nu_7$ | 15 1 14 | 16 1 15 | 2342.9079 | 9.07 | $0.31 \times 10^{-2}$  | $2\nu_9$        | 10 6 4  | 10 9 1  |
| 2324.1310 | 1.88 | $0.76 \times 10^{-3}$  | $\nu_5 + \nu_7$ | 14 4 11 | 15 4 12 | 2343.2351 | 4.97 | $-0.10 \times 10^{-2}$ | $2\nu_9$        | 15 3 12 | 16 4 13 |
| 2324.4594 | 9.07 | $-0.19 \times 10^{-2}$ | $2\nu_9$        | 10 6 4  | 11 5 7  | 2343.2729 | 1.82 | $0.24 \times 10^{-2}$  | $\nu_3 + \nu_4$ | 13 11 2 | 14 12 3 |
| 2325.6934 | 0.80 | $-0.52 \times 10^{-2}$ | $\nu_5 + \nu_7$ | 10 0 10 | 11 2 9  | 2343.2729 | 1.82 | $0.29 \times 10^{-2}$  | $\nu_3 + \nu_4$ | 13 11 3 | 14 12 2 |
| 2326.4379 | 2.10 | $-0.56 \times 10^{-2}$ | $\nu_5 + \nu_7$ | 15 13 2 | 16 13 3 | 2343.4364 | 5.82 | $-0.24 \times 10^{-2}$ | $\nu_5 + \nu_7$ | 11 4 8  | 12 4 9  |
| 2326.7447 | 0.64 | $-0.24 \times 10^{-2}$ | $\nu_5 + \nu_7$ | 14 3 12 | 15 3 13 | 2343.4816 | 2.54 | $-0.42 \times 10^{-2}$ | $2\nu_9$        | 9 1 9   | 10 4 6  |
| 2326.7822 | 1.84 | $-0.52 \times 10^{-2}$ | $2\nu_9$        | 13 3 11 | 14 4 10 | 2343.5057 | 4.15 | $0.74 \times 10^{-3}$  | $\nu_5 + \nu_7$ | 8 1 8   | 9 3 7   |
| 2326.9725 | 1.23 | $0.28 \times 10^{-2}$  | $\nu_5 + \nu_7$ | 15 0 15 | 16 0 16 | 2344.6242 | 0.46 | $-0.12 \times 10^{-2}$ | $\nu_5 + \nu_7$ | 11 5 7  | 12 5 8  |
| 2327.1315 | 4.87 | $-0.49 \times 10^{-2}$ | $\nu_5 + \nu_7$ | 15 12 4 | 16 12 5 | 2344.8859 | 1.61 | $-0.15 \times 10^{-2}$ | $\nu_5 + \nu_7$ | 8 2 7   | 9 4 6   |
| 2327.3265 | 0.41 | $0.52 \times 10^{-2}$  | $\nu_5 + \nu_7$ | 10 2 9  | 11 4 8  | 2345.6500 | 9.07 | $0.21 \times 10^{-2}$  | $2\nu_9$        | 9 9 0   | 10 10 1 |
| 2327.3265 | 0.41 | $0.29 \times 10^{-3}$  | $\nu_5 + \nu_7$ | 13 6 7  | 14 6 8  | 2346.6446 | 1.70 | $-0.47 \times 10^{-2}$ | $\nu_5 + \nu_7$ | 8 3 5   | 9 5 4   |
| 2328.4030 | 0.88 | $-0.38 \times 10^{-2}$ | $\nu_5 + \nu_7$ | 15 9 6  | 16 9 7  | 2346.7361 | 1.21 | $0.15 \times 10^{-2}$  | $\nu_3 + \nu_4$ | 13 10 4 | 14 11 3 |
| 2328.4818 | 2.26 | $-0.11 \times 10^{-2}$ | $\nu_5 + \nu_7$ | 10 3 8  | 11 5 7  | 2346.7485 | 0.90 | $0.22 \times 10^{-2}$  | $\nu_3 + \nu_4$ | 13 10 3 | 14 11 4 |
| 2328.5085 | 3.48 | $-0.56 \times 10^{-2}$ | $\nu_5 + \nu_7$ | 15 9 7  | 16 9 8  | 2346.7930 | 2.27 | $-0.21 \times 10^{-2}$ | $\nu_5 + \nu_7$ | 11 1 10 | 12 1 11 |
| 2328.6108 | 3.26 | $-0.88 \times 10^{-3}$ | $\nu_5 + \nu_7$ | 12 4 8  | 13 4 9  | 2346.8857 | 0.80 | $0.11 \times 10^{-3}$  | $\nu_3 + \nu_4$ | 12 12 0 | 13 13 1 |
| 2329.4754 | 1.39 | $0.18 \times 10^{-3}$  | $\nu_5 + \nu_7$ | 15 10 5 | 16 10 6 | 2346.8857 | 0.80 | $0.80 \times 10^{-4}$  | $\nu_3 + \nu_4$ | 12 12 1 | 13 13 0 |
| 2329.4893 | 0.92 | $0.14 \times 10^{-2}$  | $\nu_5 + \nu_7$ | 10 5 5  | 11 7 4  | 2346.9075 | 1.04 | $0.22 \times 10^{-2}$  | $\nu_5 + \nu_7$ | 11 2 10 | 12 2 11 |
| 2329.7993 | 0.99 | $0.55 \times 10^{-2}$  | $\nu_5 + \nu_7$ | 10 2 8  | 11 4 7  | 2346.9494 | 0.68 | $-0.68 \times 10^{-2}$ | $2\nu_9$        | 10 1 10 | 11 2 9  |
| 2330.2237 | 9.07 | $0.53 \times 10^{-2}$  | $2\nu_9$        | 12 2 11 | 13 3 10 | 2347.0568 | 0.76 | $-0.26 \times 10^{-2}$ | $\nu_5 + \nu_7$ | 8 7 2   | 9 9 1   |
| 2330.3370 | 3.28 | $0.89 \times 10^{-3}$  | $\nu_5 + \nu_7$ | 13 4 10 | 14 4 11 | 2347.4534 | 3.71 | $0.67 \times 10^{-2}$  | $2\nu_9$        | 14 2 12 | 15 3 13 |
| 2330.4557 | 0.47 | $-0.43 \times 10^{-2}$ | $\nu_5 + \nu_7$ | 10 3 7  | 11 5 6  | 2348.0217 | 1.60 | $0.62 \times 10^{-2}$  | $\nu_3 + \nu_4$ | 10 6 5  | 11 9 2  |
| 2331.7694 | 4.39 | $-0.52 \times 10^{-2}$ | $\nu_5 + \nu_7$ | 13 6 8  | 14 6 9  | 2348.0217 | 1.60 | $0.90 \times 10^{-3}$  | $\nu_5 + \nu_7$ | 13 11 2 | 14 11 3 |

| (I)       | (II) | (III)                  | (IV)            | (V)     | (VI)    | (I)       | (II) | (III)                  | (IV)            | (V)     | (VI)    |
|-----------|------|------------------------|-----------------|---------|---------|-----------|------|------------------------|-----------------|---------|---------|
| 2348.9319 | 2.02 | $0.53 \times 10^{-2}$  | $\nu_5 + \nu_7$ | 11 0 11 | 12 0 12 | 2361.5402 | 9.07 | $-0.68 \times 10^{-2}$ | $2\nu_9$        | 12 1 11 | 13 2 12 |
| 2348.9319 | 2.02 | $0.13 \times 10^{-2}$  | $\nu_5 + \nu_7$ | 11 1 11 | 12 1 12 | 2361.6036 | 0.36 | $-0.48 \times 10^{-2}$ | $\nu_5 + \nu_7$ | 6 3 3   | 7 5 2   |
| 2349.2149 | 5.17 | $0.40 \times 10^{-4}$  | $\nu_3 + \nu_4$ | 11 5 7  | 12 8 4  | 2362.1429 | 0.53 | $-0.12 \times 10^{-2}$ | $\nu_5 + \nu_7$ | 8 4 4   | 9 4 5   |
| 2349.4767 | 1.77 | $-0.73 \times 10^{-3}$ | $\nu_3 + \nu_4$ | 12 11 2 | 13 12 1 | 2362.1640 | 9.07 | $-0.16 \times 10^{-2}$ | $2\nu_9$        | 10 4 6  | 11 7 5  |
| 2349.4767 | 1.77 | $-0.77 \times 10^{-3}$ | $\nu_3 + \nu_4$ | 12 11 1 | 13 12 2 | 2362.2801 | 0.58 | $-0.48 \times 10^{-2}$ | $\nu_5 + \nu_7$ | 10 7 3  | 11 7 4  |
| 2349.6832 | 4.83 | $-0.34 \times 10^{-2}$ | $\nu_5 + \nu_7$ | 10 5 5  | 11 5 6  | 2362.2930 | 0.81 | $0.18 \times 10^{-2}$  | $\nu_5 + \nu_7$ | 6 0 6   | 7 2 5   |
| 2349.6832 | 4.83 | $0.35 \times 10^{-2}$  | $2\nu_9$        | 12 4 9  | 13 5 8  | 2362.5338 | 0.38 | $-0.61 \times 10^{-2}$ | $2\nu_9$        | 9 8 1   | 10 9 2  |
| 2350.1802 | 0.22 | $-0.12 \times 10^{-2}$ | $\nu_5 + \nu_7$ | 14 12 2 | 14 14 1 | 2362.5338 | 0.38 | $-0.30 \times 10^{-2}$ | $2\nu_9$        | 9 8 2   | 10 9 1  |
| 2350.6394 | 1.66 | $0.48 \times 10^{-3}$  | $\nu_3 + \nu_4$ | 10 6 4  | 11 9 3  | 2362.5411 | 0.41 | $0.12 \times 10^{-2}$  | $2\nu_9$        | 9 8 1   | 10 9 2  |
| 2350.8913 | 4.75 | $0.56 \times 10^{-2}$  | $\nu_5 + \nu_7$ | 12 8 4  | 13 8 5  | 2362.5411 | 0.41 | $0.43 \times 10^{-2}$  | $2\nu_9$        | 9 8 2   | 10 9 1  |
| 2351.8828 | 9.07 | $-0.18 \times 10^{-3}$ | $2\nu_9$        | 13 1 12 | 14 2 13 | 2363.5007 | 0.36 | $-0.65 \times 10^{-2}$ | $\nu_3 + \nu_4$ | 11 4 7  | 12 7 6  |
| 2351.8828 | 9.07 | $-0.48 \times 10^{-3}$ | $2\nu_9$        | 13 2 12 | 14 1 13 | 2363.5007 | 0.36 | $-0.13 \times 10^{-2}$ | $\nu_5 + \nu_7$ | 10 4 6  | 11 2 9  |
| 2351.9599 | 2.44 | $-0.27 \times 10^{-2}$ | $\nu_3 + \nu_4$ | 14 6 9  | 15 7 8  | 2363.7926 | 3.37 | $0.33 \times 10^{-2}$  | $\nu_3 + \nu_4$ | 10 3 8  | 11 6 5  |
| 2352.3909 | 0.63 | $0.43 \times 10^{-2}$  | $\nu_5 + \nu_7$ | 7 1 7   | 8 3 6   | 2363.9143 | 0.60 | $-0.27 \times 10^{-2}$ | $\nu_5 + \nu_7$ | 8 3 6   | 9 3 7   |
| 2352.5659 | 1.62 | $-0.22 \times 10^{-2}$ | $\nu_5 + \nu_7$ | 12 8 5  | 13 8 6  | 2363.9580 | 0.63 | $-0.12 \times 10^{-2}$ | $2\nu_9$        | 10 3 8  | 11 4 7  |
| 2352.8702 | 1.78 | $0.28 \times 10^{-2}$  | $\nu_5 + \nu_7$ | 10 2 9  | 11 2 10 | 2364.3034 | 1.08 | $0.55 \times 10^{-2}$  | $\nu_5 + \nu_7$ | 8 1 7   | 9 1 8   |
| 2353.1006 | 2.00 | $0.33 \times 10^{-2}$  | $\nu_5 + \nu_7$ | 7 5 3   | 8 7 2   | 2364.3981 | 0.16 | $0.45 \times 10^{-2}$  | $\nu_5 + \nu_7$ | 12 1 11 | 13 1 12 |
| 2353.1006 | 2.00 | $0.37 \times 10^{-2}$  | $\nu_5 + \nu_7$ | 7 5 2   | 8 7 1   | 2364.4658 | 0.38 | $-0.27 \times 10^{-2}$ | $\nu_5 + \nu_7$ | 6 1 5   | 7 3 4   |
| 2353.1267 | 0.40 | $-0.28 \times 10^{-2}$ | $\nu_5 + \nu_7$ | 7 4 3   | 8 6 2   | 2364.5583 | 4.93 | $0.18 \times 10^{-2}$  | $\nu_5 + \nu_7$ | 11 9 3  | 12 9 4  |
| 2353.4823 | 4.43 | $-0.19 \times 10^{-2}$ | $\nu_5 + \nu_7$ | 11 7 4  | 12 7 5  | 2364.5583 | 4.93 | $0.22 \times 10^{-2}$  | $\nu_5 + \nu_7$ | 11 9 2  | 12 9 3  |
| 2353.4939 | 4.17 | $-0.36 \times 10^{-2}$ | $\nu_3 + \nu_4$ | 9 6 4   | 10 9 1  | 2364.7532 | 4.68 | $0.73 \times 10^{-3}$  | $\nu_5 + \nu_7$ | 13 4 10 | 14 2 13 |
| 2353.6998 | 0.48 | $0.21 \times 10^{-2}$  | $\nu_5 + \nu_7$ | 7 6 2   | 8 8 1   | 2364.8392 | 0.45 | $0.55 \times 10^{-3}$  | $\nu_5 + \nu_7$ | 15 3 13 | 16 1 16 |
| 2353.6998 | 0.48 | $-0.24 \times 10^{-2}$ | $\nu_5 + \nu_7$ | 7 6 1   | 8 8 0   | 2364.9721 | 0.88 | $0.13 \times 10^{-2}$  | $\nu_5 + \nu_7$ | 8 2 7   | 9 2 8   |
| 2353.8393 | 1.69 | $0.22 \times 10^{-3}$  | $\nu_5 + \nu_7$ | 11 7 5  | 12 7 6  | 2365.0591 | 3.24 | $-0.10 \times 10^{-2}$ | $\nu_3 + \nu_4$ | 10 10 1 | 11 11 0 |
| 2354.1030 | 0.26 | $0.31 \times 10^{-2}$  | $\nu_3 + \nu_4$ | 11 4 8  | 12 7 5  | 2365.0591 | 3.24 | $-0.10 \times 10^{-2}$ | $\nu_3 + \nu_4$ | 10 10 0 | 11 11 1 |
| 2354.2075 | 1.46 | $-0.55 \times 10^{-3}$ | $\nu_5 + \nu_7$ | 7 3 4   | 8 5 3   | 2365.4908 | 2.04 | $0.43 \times 10^{-2}$  | $2\nu_9$        | 7 5 2   | 8 8 1   |
| 2354.3928 | 0.40 | $-0.24 \times 10^{-2}$ | $2\nu_9$        | 10 3 7  | 11 4 8  | 2365.7136 | 1.80 | $0.51 \times 10^{-2}$  | $\nu_3 + \nu_4$ | 11 8 4  | 12 9 3  |
| 2354.6083 | 9.07 | $-0.29 \times 10^{-2}$ | $2\nu_9$        | 9 2 8   | 10 5 5  | 2365.8513 | 0.53 | $-0.64 \times 10^{-2}$ | $\nu_3 + \nu_4$ | 11 8 3  | 12 9 4  |
| 2354.6982 | 1.14 | $-0.46 \times 10^{-2}$ | $2\nu_9$        | 9 9 1   | 10 10 0 | 2366.3162 | 0.22 | $0.36 \times 10^{-2}$  | $\nu_3 + \nu_4$ | 11 3 8  | 12 6 7  |
| 2354.8542 | 1.71 | $-0.11 \times 10^{-2}$ | $\nu_5 + \nu_7$ | 10 0 10 | 11 0 11 | 2366.5317 | 9.07 | $-0.12 \times 10^{-2}$ | $2\nu_9$        | 11 1 11 | 12 0 12 |
| 2355.7817 | 2.71 | $0.27 \times 10^{-2}$  | $\nu_3 + \nu_4$ | 11 11 0 | 12 12 1 | 2366.5317 | 9.07 | $-0.15 \times 10^{-2}$ | $2\nu_9$        | 11 0 11 | 12 1 12 |
| 2355.7817 | 2.71 | $0.27 \times 10^{-2}$  | $\nu_3 + \nu_4$ | 11 11 1 | 12 12 0 | 2366.7407 | 2.03 | $-0.34 \times 10^{-2}$ | $\nu_5 + \nu_7$ | 8 0 8   | 9 0 9   |
| 2355.9737 | 3.11 | $0.32 \times 10^{-2}$  | $\nu_5 + \nu_7$ | 7 2 5   | 8 4 4   | 2367.0059 | 0.19 | $-0.17 \times 10^{-3}$ | $\nu_5 + \nu_7$ | 11 10 2 | 12 10 3 |
| 2356.2175 | 1.07 | $-0.17 \times 10^{-2}$ | $\nu_3 + \nu_4$ | 12 9 4  | 13 10 3 | 2367.0059 | 0.19 | $-0.54 \times 10^{-3}$ | $\nu_5 + \nu_7$ | 11 10 1 | 12 10 2 |
| 2356.2727 | 4.37 | $0.31 \times 10^{-3}$  | $\nu_3 + \nu_4$ | 12 9 3  | 13 10 4 | 2367.2246 | 0.55 | $0.39 \times 10^{-2}$  | $\nu_3 + \nu_4$ | 12 7 5  | 13 8 6  |
| 2356.8558 | 4.55 | $0.35 \times 10^{-2}$  | $2\nu_9$        | 13 3 11 | 14 2 12 | 2367.3558 | 9.07 | $-0.14 \times 10^{-2}$ | $2\nu_9$        | 8 8 1   | 9 9 0   |
| 2356.9165 | 0.76 | $-0.17 \times 10^{-2}$ | $\nu_5 + \nu_7$ | 10 6 5  | 11 6 6  | 2367.3558 | 9.07 | $-0.17 \times 10^{-2}$ | $2\nu_9$        | 8 8 0   | 9 9 1   |
| 2357.3172 | 5.23 | $-0.97 \times 10^{-3}$ | $\nu_5 + \nu_7$ | 9 3 7   | 10 3 8  | 2367.4592 | 4.85 | $0.33 \times 10^{-2}$  | $\nu_3 + \nu_4$ | 11 1 10 | 12 4 9  |
| 2357.6108 | 0.62 | $-0.77 \times 10^{-3}$ | $\nu_5 + \nu_7$ | 9 4 6   | 10 4 7  | 2367.5716 | 3.23 | $0.17 \times 10^{-2}$  | $\nu_5 + \nu_7$ | 14 2 12 | 15 0 15 |
| 2357.6774 | 0.35 | $-0.45 \times 10^{-2}$ | $\nu_3 + \nu_4$ | 11 5 6  | 12 8 5  | 2367.7921 | 3.51 | $0.95 \times 10^{-3}$  | $\nu_5 + \nu_7$ | 14 3 12 | 15 1 15 |
| 2358.4934 | 0.83 | $-0.37 \times 10^{-2}$ | $\nu_5 + \nu_7$ | 9 1 8   | 10 1 9  | 2367.9124 | 0.94 | $-0.21 \times 10^{-2}$ | $\nu_5 + \nu_7$ | 10 8 3  | 11 8 4  |
| 2358.4934 | 0.83 | $-0.49 \times 10^{-2}$ | $2\nu_9$        | 8 1 8   | 9 4 5   | 2367.9124 | 0.94 | $0.32 \times 10^{-2}$  | $\nu_5 + \nu_7$ | 10 8 2  | 11 8 3  |
| 2358.5011 | 0.77 | $0.40 \times 10^{-2}$  | $\nu_5 + \nu_7$ | 9 1 8   | 10 1 9  | 2368.0229 | 0.93 | $-0.56 \times 10^{-2}$ | $\nu_3 + \nu_4$ | 9 4 6   | 10 7 3  |
| 2358.5011 | 0.77 | $0.28 \times 10^{-2}$  | $2\nu_9$        | 8 1 8   | 9 4 5   | 2368.1899 | 0.31 | $-0.32 \times 10^{-2}$ | $\nu_5 + \nu_7$ | 12 4 9  | 13 2 12 |
| 2358.7983 | 1.13 | $-0.50 \times 10^{-2}$ | $\nu_3 + \nu_4$ | 11 10 2 | 12 11 1 | 2368.4585 | 0.44 | $0.97 \times 10^{-3}$  | $\nu_3 + \nu_4$ | 9 1 9   | 10 4 6  |
| 2358.7983 | 1.13 | $-0.52 \times 10^{-2}$ | $\nu_3 + \nu_4$ | 11 10 1 | 12 11 2 | 2368.5817 | 0.24 | $0.28 \times 10^{-2}$  | $\nu_5 + \nu_7$ | 8 5 4   | 9 5 5   |
| 2358.8087 | 2.25 | $0.52 \times 10^{-2}$  | $\nu_3 + \nu_4$ | 11 10 1 | 12 11 2 | 2368.7898 | 0.45 | $0.84 \times 10^{-3}$  | $\nu_5 + \nu_7$ | 5 3 3   | 6 5 2   |
| 2358.8087 | 2.25 | $0.54 \times 10^{-2}$  | $\nu_3 + \nu_4$ | 11 10 2 | 12 11 1 | 2369.5741 | 4.11 | $0.51 \times 10^{-3}$  | $\nu_5 + \nu_7$ | 11 5 7  | 12 3 10 |
| 2358.8803 | 3.07 | $-0.21 \times 10^{-2}$ | $\nu_5 + \nu_7$ | 9 2 8   | 10 2 9  | 2369.6549 | 0.28 | $-0.14 \times 10^{-2}$ | $\nu_3 + \nu_4$ | 10 4 6  | 11 7 5  |
| 2359.0481 | 0.78 | $-0.12 \times 10^{-2}$ | $\nu_3 + \nu_4$ | 8 6 3   | 9 9 0   | 2369.7076 | 0.37 | $0.16 \times 10^{-2}$  | $\nu_5 + \nu_7$ | 5 2 4   | 6 4 3   |
| 2359.2588 | 4.18 | $-0.62 \times 10^{-2}$ | $2\nu_9$        | 9 1 9   | 10 2 8  | 2369.8517 | 0.51 | $0.23 \times 10^{-2}$  | $\nu_5 + \nu_7$ | 15 2 14 | 15 4 11 |
| 2359.5126 | 0.74 | $0.42 \times 10^{-2}$  | $\nu_5 + \nu_7$ | 11 8 4  | 12 8 5  | 2369.9216 | 1.51 | $-0.95 \times 10^{-3}$ | $2\nu_9$        | 12 3 9  | 13 4 10 |
| 2359.6400 | 0.42 | $0.37 \times 10^{-2}$  | $2\nu_9$        | 8 5 3   | 9 8 2   | 2370.0398 | 4.65 | $0.41 \times 10^{-2}$  | $2\nu_9$        | 12 4 9  | 13 3 10 |
| 2359.8104 | 4.79 | $-0.28 \times 10^{-2}$ | $2\nu_9$        | 8 5 4   | 9 8 1   | 2370.0747 | 0.77 | $0.50 \times 10^{-2}$  | $\nu_5 + \nu_7$ | 7 1 6   | 8 1 7   |
| 2360.1359 | 1.60 | $0.37 \times 10^{-2}$  | $\nu_3 + \nu_4$ | 12 8 5  | 13 9 4  | 2370.7275 | 0.85 | $-0.28 \times 10^{-2}$ | $\nu_5 + \nu_7$ | 7 3 5   | 8 3 6   |
| 2360.1421 | 1.46 | $-0.21 \times 10^{-2}$ | $2\nu_9$        | 9 3 7   | 10 6 4  | 2370.8933 | 9.07 | $-0.43 \times 10^{-2}$ | $2\nu_9$        | 11 1 10 | 12 2 11 |
| 2360.4747 | 0.56 | $0.22 \times 10^{-2}$  | $\nu_5 + \nu_7$ | 8 2 6   | 9 2 7   | 2370.9685 | 1.09 | $-0.36 \times 10^{-2}$ | $\nu_3 + \nu_4$ | 11 7 4  | 12 8 5  |
| 2360.6769 | 0.68 | $-0.46 \times 10^{-2}$ | $\nu_5 + \nu_7$ | 6 4 3   | 7 6 2   | 2371.0918 | 0.26 | $-0.76 \times 10^{-3}$ | $\nu_5 + \nu_7$ | 7 4 3   | 8 4 4   |
| 2360.7151 | 6.01 | $0.17 \times 10^{-2}$  | $\nu_3 + \nu_4$ | 12 8 4  | 13 9 5  | 2371.1594 | 1.42 | $0.39 \times 10^{-3}$  | $\nu_5 + \nu_7$ | 7 2 6   | 8 2 7   |
| 2360.7910 | 1.59 | $-0.33 \times 10^{-2}$ | $\nu_5 + \nu_7$ | 9 0 9   | 10 0 10 | 2371.2872 | 4.20 | $-0.57 \times 10^{-2}$ | $2\nu_9$        | 8 1 8   | 9 2 7   |
| 2360.8065 | 2.62 | $-0.29 \times 10^{-2}$ | $\nu_3 + \nu_4$ | 14 7 7  | 15 8 8  | 2371.3431 | 0.41 | $-0.15 \times 10^{-3}$ | $\nu_5 + \nu_7$ | 11 6 6  | 12 4 9  |
| 2360.8065 | 2.62 | $-0.50 \times 10^{-2}$ | $\nu_5 + \nu_7$ | 9 1 9   | 10 1 10 | 2371.4808 | 1.90 | $0.79 \times 10^{-3}$  | $\nu_3 + \nu_4$ | 10 8 3  | 11 9 2  |
| 2361.1714 | 3.07 | $0.25 \times 10^{-2}$  | $\nu_5 + \nu_7$ | 6 1 6   | 7 3 5   | 2371.5080 | 2.58 | $-0.41 \times 10^{-3}$ | $\nu_3 + \nu_4$ | 10 8 2  | 11 9 3  |
| 2361.2267 | 0.80 | $-0.12 \times 10^{-2}$ | $\nu_5 + \nu_7$ | 6 3 4   | 7 5 3   | 2371.8832 | 0.15 | $0.23 \times 10^{-2}$  | $\nu_5 + \nu_7$ | 12 10 2 | 12 12 1 |
| 2361.3988 | 1.21 | $-0.40 \times 10^{-3}$ | $\nu_3 + \nu_4$ | 9 5 5   | 10 8 2  | 2372.1408 | 9.07 | $-0.41 \times 10^{-2}$ | $2\nu_9$        | 9 3 6   | 10 6 5  |
| 2361.3988 | 1.21 | $-0.63 \times 10^{-2}$ | $2\nu_9$        | 13 4 10 | 14 3 11 | 2372.1408 | 9.07 | $-0.12 \times 10^{-2}$ | $2\nu_9$        | 10 4 7  | 11 5 6  |
| 2361.5402 | 9.07 | $-0.65 \times 10^{-2}$ | $2\nu_9$        | 12 2 11 | 13 1 12 | 2372.3786 | 0.50 | $0.58 \times 10^{-2}$  | $\nu_3 + \nu_4$ | 15 2 13 | 16 3 14 |

| (I)       | (II) | (III)                  | (IV)            | (V)     | (VI)    | (I)       | (II) | (III)                  | (IV)            | (V)     | (VI)    |
|-----------|------|------------------------|-----------------|---------|---------|-----------|------|------------------------|-----------------|---------|---------|
| 2372.3786 | 0.50 | $-0.28 \times 10^{-2}$ | $2\nu_9$        | 7 1 7   | 8 4 4   | 2381.6232 | 2.68 | $-0.24 \times 10^{-2}$ | $\nu_3 + \nu_4$ | 14 2 13 | 15 1 14 |
| 2372.7282 | 0.31 | $-0.51 \times 10^{-2}$ | $\nu_3 + \nu_4$ | 11 4 8  | 12 5 7  | 2381.6548 | 0.57 | $-0.30 \times 10^{-2}$ | $2\nu_9$        | 8 6 3   | 9 7 2   |
| 2372.7694 | 2.23 | $-0.40 \times 10^{-2}$ | $\nu_5 + \nu_7$ | 7 1 7   | 8 1 8   | 2381.7003 | 2.74 | $0.18 \times 10^{-3}$  | $\nu_5 + \nu_7$ | 15 11 4 | 15 13 3 |
| 2372.7694 | 2.23 | $0.79 \times 10^{-3}$  | $\nu_5 + \nu_7$ | 9 3 6   | 10 1 9  | 2381.7733 | 5.23 | $-0.51 \times 10^{-3}$ | $\nu_5 + \nu_7$ | 7 4 3   | 8 2 6   |
| 2373.0179 | 0.53 | $-0.51 \times 10^{-2}$ | $\nu_3 + \nu_4$ | 11 6 6  | 12 7 5  | 2381.8200 | 0.36 | $-0.63 \times 10^{-2}$ | $\nu_3 + \nu_4$ | 8 2 7   | 9 5 4   |
| 2373.2912 | 0.42 | $0.21 \times 10^{-2}$  | $\nu_5 + \nu_7$ | 8 6 2   | 9 6 3   | 2381.8570 | 0.87 | $0.26 \times 10^{-2}$  | $\nu_5 + \nu_7$ | 5 1 4   | 6 1 5   |
| 2373.3656 | 0.70 | $0.20 \times 10^{-4}$  | $\nu_5 + \nu_7$ | 6 2 4   | 7 2 5   | 2382.2952 | 0.14 | $-0.18 \times 10^{-2}$ | $\nu_5 + \nu_7$ | 9 9 0   | 10 9 1  |
| 2373.3656 | 0.70 | $-0.35 \times 10^{-2}$ | $2\nu_9$        | 10 4 6  | 11 7 5  | 2382.2952 | 0.14 | $-0.18 \times 10^{-2}$ | $\nu_5 + \nu_7$ | 9 9 1   | 10 9 2  |
| 2373.5787 | 0.24 | $0.56 \times 10^{-2}$  | $\nu_3 + \nu_4$ | 10 3 7  | 11 6 6  | 2382.8832 | 0.34 | $0.62 \times 10^{-2}$  | $\nu_3 + \nu_4$ | 9 2 7   | 10 5 6  |
| 2373.7842 | 0.31 | $-0.20 \times 10^{-2}$ | $\nu_5 + \nu_7$ | 12 3 10 | 13 1 13 | 2383.0627 | 0.48 | $0.80 \times 10^{-4}$  | $2\nu_9$        | 7 1 7   | 8 2 6   |
| 2373.7842 | 0.31 | $-0.15 \times 10^{-2}$ | $\nu_5 + \nu_7$ | 14 3 11 | 14 5 10 | 2383.3246 | 3.55 | $0.37 \times 10^{-2}$  | $\nu_5 + \nu_7$ | 5 3 2   | 6 3 3   |
| 2374.1938 | 3.29 | $-0.21 \times 10^{-2}$ | $2\nu_9$        | 10 6 4  | 10 7 3  | 2383.4554 | 0.14 | $0.26 \times 10^{-2}$  | $\nu_5 + \nu_7$ | 8 2 6   | 9 0 9   |
| 2374.3032 | 0.56 | $-0.19 \times 10^{-2}$ | $\nu_5 + \nu_7$ | 14 2 13 | 14 4 10 | 2383.5464 | 5.67 | $-0.63 \times 10^{-2}$ | $\nu_3 + \nu_4$ | 9 1 8   | 10 4 7  |
| 2374.4788 | 0.60 | $0.46 \times 10^{-2}$  | $\nu_3 + \nu_4$ | 11 5 7  | 12 6 6  | 2383.5464 | 5.67 | $-0.16 \times 10^{-2}$ | $\nu_3 + \nu_4$ | 13 8 6  | 14 7 7  |
| 2374.7954 | 9.07 | $-0.44 \times 10^{-2}$ | $2\nu_9$        | 11 2 9  | 12 3 10 | 2383.5464 | 5.67 | $0.54 \times 10^{-3}$  | $\nu_5 + \nu_7$ | 9 3 7   | 10 1 10 |
| 2374.8136 | 2.23 | $0.14 \times 10^{-2}$  | $2\nu_9$        | 11 3 9  | 12 2 10 | 2383.7897 | 3.20 | $-0.50 \times 10^{-3}$ | $\nu_3 + \nu_4$ | 7 4 3   | 8 7 2   |
| 2374.8136 | 2.23 | $-0.91 \times 10^{-3}$ | $2\nu_9$        | 8 7 1   | 9 8 2   | 2383.7897 | 3.20 | $0.33 \times 10^{-2}$  | $\nu_3 + \nu_4$ | 12 4 9  | 13 3 10 |
| 2374.9353 | 0.36 | $-0.34 \times 10^{-2}$ | $\nu_5 + \nu_7$ | 8 4 4   | 9 2 7   | 2383.8304 | 0.28 | $0.58 \times 10^{-2}$  | $\nu_3 + \nu_4$ | 12 6 7  | 13 5 8  |
| 2374.9500 | 0.57 | $-0.29 \times 10^{-2}$ | $\nu_5 + \nu_7$ | 6 3 3   | 7 3 4   | 2383.9342 | 1.19 | $-0.62 \times 10^{-3}$ | $\nu_5 + \nu_7$ | 5 2 4   | 6 2 5   |
| 2374.9500 | 0.57 | $-0.75 \times 10^{-3}$ | $\nu_5 + \nu_7$ | 10 5 6  | 11 3 9  | 2384.2252 | 0.48 | $-0.48 \times 10^{-2}$ | $\nu_3 + \nu_4$ | 11 5 6  | 12 6 7  |
| 2375.0561 | 0.41 | $0.13 \times 10^{-2}$  | $\nu_5 + \nu_7$ | 15 1 15 | 15 3 12 | 2384.3166 | 5.36 | $-0.18 \times 10^{-2}$ | $\nu_5 + \nu_7$ | 6 5 2   | 7 5 3   |
| 2375.2111 | 1.78 | $0.19 \times 10^{-2}$  | $\nu_3 + \nu_4$ | 10 7 4  | 11 8 3  | 2384.3454 | 0.98 | $-0.30 \times 10^{-2}$ | $2\nu_9$        | 7 3 4   | 8 6 3   |
| 2375.5504 | 0.56 | $-0.28 \times 10^{-2}$ | $2\nu_9$        | 9 3 7   | 10 4 6  | 2384.7859 | 2.32 | $-0.28 \times 10^{-2}$ | $\nu_3 + \nu_4$ | 9 6 4   | 10 7 3  |
| 2375.8823 | 1.50 | $0.47 \times 10^{-2}$  | $\nu_5 + \nu_7$ | 6 1 5   | 7 1 6   | 2384.8852 | 2.81 | $0.37 \times 10^{-2}$  | $\nu_5 + \nu_7$ | 5 3 3   | 6 3 4   |
| 2376.0560 | 0.44 | $-0.69 \times 10^{-2}$ | $\nu_3 + \nu_4$ | 10 2 9  | 11 3 8  | 2384.9155 | 3.92 | $0.19 \times 10^{-2}$  | $2\nu_9$        | 6 1 6   | 7 4 3   |
| 2376.1092 | 9.07 | $-0.37 \times 10^{-2}$ | $2\nu_9$        | 10 1 10 | 11 0 11 | 2385.1258 | 0.29 | $-0.16 \times 10^{-3}$ | $2\nu_9$        | 6 3 4   | 7 6 1   |
| 2376.1420 | 5.60 | $0.37 \times 10^{-2}$  | $\nu_5 + \nu_7$ | 4 3 2   | 5 5 1   | 2385.1478 | 0.14 | $-0.14 \times 10^{-2}$ | $\nu_5 + \nu_7$ | 8 4 5   | 9 2 8   |
| 2376.1420 | 5.60 | $0.72 \times 10^{-3}$  | $\nu_5 + \nu_7$ | 9 8 1   | 10 8 2  | 2385.2703 | 6.05 | $-0.23 \times 10^{-2}$ | $\nu_5 + \nu_7$ | 10 7 4  | 11 5 7  |
| 2376.1420 | 5.60 | $-0.80 \times 10^{-4}$ | $\nu_5 + \nu_7$ | 9 8 2   | 10 8 3  | 2385.2703 | 6.05 | $-0.23 \times 10^{-2}$ | $2\nu_9$        | 10 4 6  | 11 5 7  |
| 2376.1587 | 3.58 | $0.56 \times 10^{-2}$  | $\nu_3 + \nu_4$ | 13 6 8  | 14 5 9  | 2385.3712 | 9.07 | $-0.18 \times 10^{-2}$ | $2\nu_9$        | 9 0 9   | 10 1 10 |
| 2376.1822 | 4.32 | $0.57 \times 10^{-2}$  | $\nu_5 + \nu_7$ | 4 3 1   | 5 5 0   | 2385.3712 | 9.07 | $0.15 \times 10^{-3}$  | $2\nu_9$        | 9 1 9   | 10 0 10 |
| 2376.2660 | 0.13 | $0.64 \times 10^{-2}$  | $\nu_3 + \nu_4$ | 10 1 10 | 11 2 9  | 2385.5777 | 0.13 | $0.31 \times 10^{-2}$  | $\nu_5 + \nu_7$ | 9 6 4   | 10 4 7  |
| 2376.3168 | 5.03 | $-0.56 \times 10^{-2}$ | $\nu_5 + \nu_7$ | 7 5 2   | 8 5 3   | 2385.6111 | 1.78 | $-0.65 \times 10^{-2}$ | $2\nu_9$        | 10 3 7  | 11 4 8  |
| 2376.5295 | 0.29 | $0.95 \times 10^{-3}$  | $\nu_5 + \nu_7$ | 7 5 3   | 8 5 4   | 2385.8203 | 3.02 | $-0.49 \times 10^{-2}$ | $\nu_3 + \nu_4$ | 9 6 3   | 10 7 4  |
| 2376.7043 | 0.51 | $0.32 \times 10^{-2}$  | $2\nu_9$        | 9 6 4   | 10 7 3  | 2386.1305 | 1.27 | $0.41 \times 10^{-2}$  | $\nu_5 + \nu_7$ | 3 1 3   | 4 3 2   |
| 2376.7908 | 0.50 | $-0.19 \times 10^{-2}$ | $2\nu_9$        | 8 1 7   | 9 4 6   | 2386.2771 | 2.23 | $0.40 \times 10^{-2}$  | $\nu_5 + \nu_7$ | 7 7 0   | 8 7 1   |
| 2377.0684 | 0.32 | $-0.56 \times 10^{-2}$ | $\nu_3 + \nu_4$ | 14 2 12 | 15 3 13 | 2386.2771 | 2.23 | $0.81 \times 10^{-3}$  | $2\nu_9$        | 10 4 7  | 11 3 8  |
| 2377.3675 | 3.49 | $-0.41 \times 10^{-2}$ | $\nu_5 + \nu_7$ | 4 2 3   | 5 4 2   | 2386.2896 | 1.58 | $0.56 \times 10^{-2}$  | $\nu_5 + \nu_7$ | 7 7 1   | 8 7 2   |
| 2377.4750 | 4.15 | $0.34 \times 10^{-2}$  | $\nu_3 + \nu_4$ | 9 8 1   | 10 9 2  | 2386.3603 | 0.61 | $-0.16 \times 10^{-2}$ | $\nu_5 + \nu_7$ | 6 3 3   | 7 1 6   |
| 2377.4750 | 4.15 | $0.72 \times 10^{-3}$  | $\nu_5 + \nu_7$ | 6 2 5   | 7 2 6   | 2386.3895 | 0.11 | $0.12 \times 10^{-2}$  | $\nu_5 + \nu_7$ | 7 2 5   | 8 0 8   |
| 2377.7339 | 0.51 | $-0.34 \times 10^{-2}$ | $\nu_5 + \nu_7$ | 6 3 4   | 7 3 5   | 2386.8801 | 3.79 | $0.10 \times 10^{-2}$  | $\nu_3 + \nu_4$ | 8 7 2   | 9 8 1   |
| 2377.7937 | 0.21 | $-0.13 \times 10^{-2}$ | $2\nu_9$        | 7 3 5   | 8 6 2   | 2386.8935 | 2.35 | $0.10 \times 10^{-2}$  | $\nu_3 + \nu_4$ | 8 7 1   | 9 8 2   |
| 2377.8673 | 0.18 | $-0.47 \times 10^{-2}$ | $2\nu_9$        | 7 2 6   | 8 5 3   | 2386.9071 | 2.45 | $0.29 \times 10^{-2}$  | $2\nu_9$        | 7 6 2   | 8 7 1   |
| 2378.0431 | 3.26 | $-0.34 \times 10^{-2}$ | $2\nu_9$        | 11 3 8  | 12 4 9  | 2386.9299 | 1.73 | $0.36 \times 10^{-2}$  | $\nu_3 + \nu_4$ | 12 2 10 | 13 3 11 |
| 2378.3281 | 1.44 | $0.25 \times 10^{-2}$  | $2\nu_9$        | 11 4 8  | 12 3 9  | 2387.1180 | 4.20 | $-0.62 \times 10^{-2}$ | $2\nu_9$        | 8 5 4   | 9 6 3   |
| 2378.5589 | 5.44 | $0.27 \times 10^{-2}$  | $\nu_5 + \nu_7$ | 8 7 1   | 9 7 2   | 2388.0845 | 0.11 | $-0.64 \times 10^{-3}$ | $\nu_3 + \nu_4$ | 6 4 2   | 7 7 1   |
| 2378.6571 | 2.09 | $-0.20 \times 10^{-2}$ | $\nu_5 + \nu_7$ | 6 0 6   | 7 0 7   | 2388.1558 | 2.10 | $0.36 \times 10^{-2}$  | $\nu_5 + \nu_7$ | 4 1 3   | 5 1 4   |
| 2378.7985 | 2.31 | $-0.17 \times 10^{-2}$ | $\nu_5 + \nu_7$ | 6 1 6   | 7 1 7   | 2388.1809 | 0.74 | $-0.46 \times 10^{-3}$ | $\nu_5 + \nu_7$ | 4 2 2   | 5 2 3   |
| 2379.0223 | 2.81 | $0.99 \times 10^{-3}$  | $\nu_3 + \nu_4$ | 10 6 5  | 11 7 4  | 2388.2902 | 0.79 | $-0.37 \times 10^{-2}$ | $2\nu_9$        | 7 2 5   | 8 5 4   |
| 2379.2730 | 0.37 | $-0.22 \times 10^{-2}$ | $\nu_5 + \nu_7$ | 11 11 0 | 12 11 1 | 2388.3176 | 0.84 | $0.86 \times 10^{-3}$  | $\nu_3 + \nu_4$ | 9 5 5   | 10 6 4  |
| 2379.2730 | 0.37 | $-0.22 \times 10^{-2}$ | $\nu_5 + \nu_7$ | 11 11 1 | 12 11 2 | 2388.4889 | 0.19 | $-0.19 \times 10^{-2}$ | $2\nu_9$        | 14 2 12 | 15 1 15 |
| 2379.7836 | 1.43 | $0.55 \times 10^{-2}$  | $\nu_3 + \nu_4$ | 14 11 4 | 15 10 5 | 2388.4889 | 0.19 | $0.15 \times 10^{-3}$  | $2\nu_9$        | 14 3 12 | 15 0 15 |
| 2379.8293 | 0.23 | $0.82 \times 10^{-3}$  | $\nu_3 + \nu_4$ | 8 3 6   | 9 6 3   | 2388.6021 | 9.07 | $-0.53 \times 10^{-2}$ | $2\nu_9$        | 9 2 8   | 10 1 9  |
| 2379.9371 | 5.17 | $0.29 \times 10^{-2}$  | $\nu_5 + \nu_7$ | 8 5 3   | 9 3 6   | 2388.6021 | 9.07 | $-0.34 \times 10^{-2}$ | $2\nu_9$        | 9 1 8   | 10 2 9  |
| 2379.9371 | 5.17 | $-0.18 \times 10^{-2}$ | $2\nu_9$        | 10 2 9  | 11 1 10 | 2388.8884 | 1.15 | $0.30 \times 10^{-2}$  | $\nu_3 + \nu_4$ | 11 5 7  | 12 4 8  |
| 2379.9371 | 5.17 | $-0.43 \times 10^{-2}$ | $2\nu_9$        | 10 3 7  | 11 2 10 | 2388.9926 | 0.14 | $0.46 \times 10^{-2}$  | $\nu_5 + \nu_7$ | 6 6 1   | 7 6 2   |
| 2380.3328 | 0.33 | $-0.12 \times 10^{-2}$ | $\nu_5 + \nu_7$ | 9 4 6   | 10 2 9  | 2389.1451 | 0.18 | $0.60 \times 10^{-2}$  | $\nu_3 + \nu_4$ | 11 3 8  | 12 4 9  |
| 2380.5311 | 0.28 | $0.43 \times 10^{-2}$  | $\nu_3 + \nu_4$ | 9 3 6   | 10 6 5  | 2389.1871 | 0.20 | $0.23 \times 10^{-2}$  | $\nu_5 + \nu_7$ | 11 2 10 | 11 4 7  |
| 2380.5311 | 0.28 | $0.43 \times 10^{-2}$  | $2\nu_9$        | 9 5 4   | 10 6 5  | 2389.4390 | 1.57 | $0.30 \times 10^{-3}$  | $2\nu_9$        | 8 4 5   | 9 5 4   |
| 2380.6004 | 0.57 | $-0.24 \times 10^{-3}$ | $\nu_5 + \nu_7$ | 5 2 3   | 6 2 4   | 2389.6145 | 2.92 | $-0.63 \times 10^{-2}$ | $\nu_3 + \nu_4$ | 9 4 6   | 10 5 5  |
| 2380.6668 | 0.14 | $0.39 \times 10^{-2}$  | $\nu_5 + \nu_7$ | 4 1 3   | 5 3 2   | 2389.6145 | 2.92 | $0.53 \times 10^{-2}$  | $\nu_3 + \nu_4$ | 11 4 8  | 12 3 9  |
| 2380.7424 | 0.16 | $0.45 \times 10^{-2}$  | $\nu_3 + \nu_4$ | 7 4 4   | 8 7 1   | 2389.7352 | 0.19 | $0.17 \times 10^{-2}$  | $\nu_5 + \nu_7$ | 6 2 4   | 7 0 7   |
| 2380.8345 | 0.16 | $0.50 \times 10^{-2}$  | $\nu_5 + \nu_7$ | 9 5 5   | 10 3 8  | 2390.0730 | 1.62 | $0.32 \times 10^{-2}$  | $\nu_3 + \nu_4$ | 12 8 5  | 13 7 6  |
| 2380.9417 | 3.29 | $0.15 \times 10^{-3}$  | $\nu_3 + \nu_4$ | 9 7 3   | 10 8 2  | 2390.2625 | 0.51 | $-0.40 \times 10^{-2}$ | $2\nu_9$        | 7 2 6   | 8 3 5   |
| 2381.0318 | 2.25 | $-0.14 \times 10^{-2}$ | $\nu_3 + \nu_4$ | 9 7 2   | 10 8 3  | 2390.2961 | 1.07 | $-0.27 \times 10^{-2}$ | $\nu_3 + \nu_4$ | 7 1 7   | 8 4 4   |
| 2381.0318 | 2.25 | $-0.14 \times 10^{-2}$ | $2\nu_9$        | 9 9 0   | 10 8 3  | 2390.4801 | 0.29 | $0.39 \times 10^{-2}$  | $\nu_3 + \nu_4$ | 8 2 6   | 9 5 5   |
| 2381.4380 | 1.12 | $0.65 \times 10^{-2}$  | $2\nu_9$        | 9 5 5   | 10 6 4  | 2390.5365 | 4.77 | $-0.34 \times 10^{-3}$ | $\nu_3 + \nu_4$ | 8 6 3   | 9 7 2   |

| (I)       | (II) | (III)                  | (IV)            | (V)     | (VI)    | (I)       | (II) | (III)                  | (IV)            | (V)     | (VI)    |
|-----------|------|------------------------|-----------------|---------|---------|-----------|------|------------------------|-----------------|---------|---------|
| 2390.5365 | 4.77 | $-0.14 \times 10^{-2}$ | $\nu_5 + \nu_7$ | 4 2 3   | 5 2 4   | 2397.2029 | 1.57 | $-0.14 \times 10^{-2}$ | $\nu_5 + \nu_7$ | 3 1 3   | 4 1 4   |
| 2390.5513 | 1.65 | $-0.39 \times 10^{-3}$ | $\nu_5 + \nu_7$ | 4 0 4   | 5 0 5   | 2397.2533 | 2.27 | $0.70 \times 10^{-3}$  | $\nu_5 + \nu_7$ | 3 2 2   | 4 2 3   |
| 2390.9994 | 1.50 | $-0.18 \times 10^{-2}$ | $\nu_5 + \nu_7$ | 4 1 4   | 5 1 5   | 2397.5295 | 0.19 | $0.12 \times 10^{-2}$  | $\nu_3 + \nu_4$ | 10 2 8  | 11 3 9  |
| 2391.1145 | 1.79 | $-0.26 \times 10^{-2}$ | $\nu_5 + \nu_7$ | 7 3 5   | 8 1 8   | 2397.5295 | 0.19 | $0.12 \times 10^{-2}$  | $2\nu_9$        | 10 2 8  | 11 3 9  |
| 2391.3307 | 2.71 | $-0.17 \times 10^{-2}$ | $2\nu_9$        | 9 3 7   | 10 2 8  | 2397.5842 | 0.17 | $0.19 \times 10^{-2}$  | $\nu_3 + \nu_4$ | 10 3 8  | 11 2 9  |
| 2391.4090 | 0.60 | $0.14 \times 10^{-2}$  | $\nu_5 + \nu_7$ | 4 3 1   | 5 3 2   | 2397.6118 | 0.68 | $0.13 \times 10^{-2}$  | $\nu_5 + \nu_7$ | 6 5 1   | 7 3 4   |
| 2391.4724 | 2.36 | $-0.58 \times 10^{-2}$ | $\nu_3 + \nu_4$ | 13 1 13 | 14 0 14 | 2397.7641 | 0.64 | $0.48 \times 10^{-2}$  | $\nu_3 + \nu_4$ | 7 2 5   | 8 5 4   |
| 2391.6650 | 0.25 | $-0.26 \times 10^{-2}$ | $\nu_3 + \nu_4$ | 8 1 7   | 9 4 6   | 2397.9106 | 1.04 | $0.23 \times 10^{-2}$  | $\nu_3 + \nu_4$ | 11 10 1 | 12 9 4  |
| 2391.7862 | 0.27 | $0.11 \times 10^{-2}$  | $2\nu_9$        | 5 3 3   | 6 6 0   | 2397.9106 | 1.04 | $0.29 \times 10^{-2}$  | $\nu_3 + \nu_4$ | 11 10 2 | 12 9 3  |
| 2391.9014 | 0.22 | $-0.47 \times 10^{-2}$ | $\nu_5 + \nu_7$ | 5 5 0   | 6 5 1   | 2397.9684 | 1.47 | $0.11 \times 10^{-2}$  | $2\nu_9$        | 6 5 2   | 7 6 1   |
| 2391.9102 | 0.24 | $0.41 \times 10^{-2}$  | $\nu_5 + \nu_7$ | 5 5 0   | 6 5 1   | 2398.0519 | 0.20 | $-0.12 \times 10^{-2}$ | $\nu_5 + \nu_7$ | 4 2 2   | 5 0 5   |
| 2391.9102 | 0.24 | $-0.53 \times 10^{-2}$ | $\nu_5 + \nu_7$ | 5 5 1   | 6 5 2   | 2398.1219 | 0.88 | $-0.55 \times 10^{-2}$ | $\nu_3 + \nu_4$ | 9 4 5   | 10 5 6  |
| 2391.9989 | 3.51 | $-0.56 \times 10^{-2}$ | $2\nu_9$        | 6 6 0   | 7 7 1   | 2398.1342 | 0.79 | $0.68 \times 10^{-2}$  | $\nu_3 + \nu_4$ | 9 4 5   | 10 5 6  |
| 2391.9989 | 3.51 | $-0.30 \times 10^{-2}$ | $2\nu_9$        | 6 6 1   | 7 7 0   | 2398.3002 | 0.14 | $0.67 \times 10^{-2}$  | $2\nu_9$        | 9 6 4   | 10 5 5  |
| 2392.0813 | 0.48 | $-0.10 \times 10^{-4}$ | $\nu_5 + \nu_7$ | 4 3 2   | 5 3 3   | 2398.5098 | 0.17 | $0.13 \times 10^{-2}$  | $\nu_5 + \nu_7$ | 13 5 8  | 13 7 7  |
| 2392.1577 | 1.25 | $-0.39 \times 10^{-2}$ | $\nu_3 + \nu_4$ | 8 0 8   | 9 3 7   | 2398.6139 | 1.56 | $-0.29 \times 10^{-2}$ | $2\nu_9$        | 8 3 5   | 9 4 6   |
| 2392.1577 | 1.25 | $0.35 \times 10^{-2}$  | $\nu_3 + \nu_4$ | 11 3 9  | 12 2 10 | 2398.7207 | 0.65 | $-0.54 \times 10^{-2}$ | $\nu_3 + \nu_4$ | 6 2 5   | 7 5 2   |
| 2392.3088 | 0.26 | $-0.21 \times 10^{-2}$ | $\nu_5 + \nu_7$ | 5 3 2   | 6 1 5   | 2399.0289 | 3.19 | $-0.24 \times 10^{-2}$ | $2\nu_9$        | 8 3 6   | 9 2 7   |
| 2392.4570 | 1.57 | $0.10 \times 10^{-2}$  | $\nu_3 + \nu_4$ | 8 1 8   | 9 2 7   | 2399.0534 | 0.45 | $0.49 \times 10^{-2}$  | $\nu_5 + \nu_7$ | 3 3 0   | 4 3 1   |
| 2392.4984 | 3.93 | $-0.24 \times 10^{-2}$ | $\nu_3 + \nu_4$ | 9 5 4   | 10 6 5  | 2399.0902 | 1.35 | $0.46 \times 10^{-2}$  | $2\nu_9$        | 7 4 3   | 8 5 4   |
| 2392.5135 | 1.11 | $0.44 \times 10^{-2}$  | $2\nu_9$        | 9 3 6   | 10 4 7  | 2399.2273 | 1.02 | $0.57 \times 10^{-2}$  | $\nu_5 + \nu_7$ | 7 6 1   | 8 4 4   |
| 2392.7063 | 0.15 | $-0.37 \times 10^{-2}$ | $\nu_3 + \nu_4$ | 7 3 4   | 8 6 3   | 2399.2519 | 0.64 | $0.40 \times 10^{-2}$  | $\nu_5 + \nu_7$ | 3 3 1   | 4 3 2   |
| 2392.7619 | 0.44 | $-0.14 \times 10^{-2}$ | $\nu_3 + \nu_4$ | 10 4 6  | 11 5 7  | 2399.7265 | 1.46 | $0.57 \times 10^{-2}$  | $\nu_3 + \nu_4$ | 7 1 6   | 8 4 5   |
| 2393.0206 | 5.09 | $0.12 \times 10^{-2}$  | $\nu_3 + \nu_4$ | 7 7 0   | 8 8 1   | 2399.9837 | 0.24 | $0.42 \times 10^{-2}$  | $\nu_5 + \nu_7$ | 5 3 3   | 6 1 6   |
| 2393.0206 | 5.09 | $0.22 \times 10^{-2}$  | $\nu_3 + \nu_4$ | 7 7 1   | 8 8 0   | 2400.1928 | 1.43 | $-0.31 \times 10^{-3}$ | $\nu_3 + \nu_4$ | 6 1 6   | 7 4 3   |
| 2393.2874 | 0.29 | $0.10 \times 10^{-2}$  | $2\nu_9$        | 6 0 6   | 7 3 5   | 2400.3283 | 0.78 | $-0.25 \times 10^{-3}$ | $\nu_3 + \nu_4$ | 7 0 7   | 8 3 6   |
| 2393.5965 | 0.17 | $0.41 \times 10^{-3}$  | $\nu_5 + \nu_7$ | 5 2 3   | 6 0 6   | 2400.3432 | 1.87 | $0.10 \times 10^{-2}$  | $\nu_3 + \nu_4$ | 7 5 3   | 8 6 2   |
| 2393.7643 | 1.84 | $0.50 \times 10^{-4}$  | $\nu_3 + \nu_4$ | 12 12 1 | 13 11 2 | 2400.6424 | 1.37 | $0.36 \times 10^{-2}$  | $\nu_3 + \nu_4$ | 11 1 11 | 12 0 12 |
| 2393.7643 | 1.84 | $0.95 \times 10^{-3}$  | $\nu_5 + \nu_7$ | 2 1 2   | 3 3 1   | 2400.6424 | 1.37 | $-0.47 \times 10^{-2}$ | $\nu_5 + \nu_7$ | 12 7 5  | 12 9 4  |
| 2393.9373 | 1.30 | $0.52 \times 10^{-2}$  | $\nu_3 + \nu_4$ | 6 3 4   | 7 6 1   | 2400.6424 | 1.37 | $-0.21 \times 10^{-2}$ | $\nu_5 + \nu_7$ | 13 9 4  | 13 11 3 |
| 2393.9373 | 1.30 | $-0.97 \times 10^{-3}$ | $2\nu_9$        | 9 4 6   | 10 3 7  | 2400.8251 | 0.11 | $-0.27 \times 10^{-2}$ | $\nu_5 + \nu_7$ | 6 5 2   | 7 3 5   |
| 2394.2713 | 5.35 | $-0.19 \times 10^{-2}$ | $2\nu_9$        | 8 1 8   | 9 0 9   | 2400.8595 | 0.84 | $-0.59 \times 10^{-2}$ | $\nu_5 + \nu_7$ | 7 6 2   | 8 4 5   |
| 2394.2713 | 5.35 | $-0.25 \times 10^{-2}$ | $2\nu_9$        | 8 0 8   | 9 1 9   | 2400.8595 | 0.84 | $0.28 \times 10^{-3}$  | $2\nu_9$        | 6 2 5   | 7 3 4   |
| 2394.4445 | 1.85 | $0.13 \times 10^{-2}$  | $\nu_3 + \nu_4$ | 8 5 4   | 9 6 3   | 2400.8953 | 0.61 | $0.43 \times 10^{-2}$  | $\nu_3 + \nu_4$ | 9 3 6   | 10 4 7  |
| 2394.5551 | 0.34 | $0.11 \times 10^{-2}$  | $2\nu_9$        | 6 1 6   | 7 2 5   | 2400.8953 | 0.61 | $0.43 \times 10^{-2}$  | $2\nu_9$        | 9 5 4   | 10 4 7  |
| 2394.7249 | 0.11 | $0.55 \times 10^{-2}$  | $\nu_5 + \nu_7$ | 2 1 1   | 3 3 0   | 2400.9785 | 0.19 | $-0.15 \times 10^{-2}$ | $\nu_3 + \nu_4$ | 7 1 7   | 8 2 6   |
| 2394.8138 | 0.23 | $0.25 \times 10^{-2}$  | $\nu_5 + \nu_7$ | 15 6 9  | 15 8 8  | 2401.0067 | 0.14 | $-0.10 \times 10^{-2}$ | $\nu_3 + \nu_4$ | 10 1 9  | 11 2 10 |
| 2394.8294 | 0.78 | $0.75 \times 10^{-3}$  | $\nu_5 + \nu_7$ | 3 1 2   | 4 1 3   | 2401.0238 | 0.27 | $0.22 \times 10^{-2}$  | $\nu_3 + \nu_4$ | 10 2 9  | 11 1 10 |
| 2394.8800 | 0.99 | $0.40 \times 10^{-2}$  | $2\nu_9$        | 8 4 4   | 9 5 5   | 2401.0561 | 2.45 | $-0.10 \times 10^{-2}$ | $\nu_3 + \nu_4$ | 7 5 2   | 8 6 3   |
| 2394.9287 | 2.12 | $0.12 \times 10^{-2}$  | $\nu_3 + \nu_4$ | 10 3 7  | 11 4 8  | 2401.1473 | 0.78 | $0.24 \times 10^{-2}$  | $2\nu_9$        | 12 2 10 | 13 1 13 |
| 2395.2402 | 0.31 | $0.37 \times 10^{-2}$  | $\nu_5 + \nu_7$ | 4 4 0   | 5 4 1   | 2401.3934 | 1.56 | $0.13 \times 10^{-2}$  | $2\nu_9$        | 8 4 5   | 9 3 6   |
| 2395.3652 | 0.44 | $-0.34 \times 10^{-2}$ | $\nu_5 + \nu_7$ | 6 3 4   | 7 1 7   | 2401.4802 | 0.23 | $-0.48 \times 10^{-2}$ | $\nu_3 + \nu_4$ | 10 7 4  | 11 6 5  |
| 2395.3652 | 0.44 | $-0.19 \times 10^{-2}$ | $2\nu_9$        | 6 2 4   | 7 5 3   | 2401.5657 | 4.61 | $-0.38 \times 10^{-2}$ | $\nu_3 + \nu_4$ | 11 6 5  | 12 5 8  |
| 2395.4473 | 0.68 | $-0.56 \times 10^{-2}$ | $\nu_3 + \nu_4$ | 10 4 7  | 11 3 8  | 2401.7684 | 1.17 | $-0.36 \times 10^{-2}$ | $\nu_5 + \nu_7$ | 2 1 1   | 3 1 2   |
| 2395.7595 | 1.45 | $0.15 \times 10^{-2}$  | $2\nu_9$        | 7 3 5   | 8 4 4   | 2401.9638 | 1.13 | $0.14 \times 10^{-3}$  | $\nu_5 + \nu_7$ | 12 8 4  | 12 10 3 |
| 2395.7923 | 0.87 | $0.40 \times 10^{-2}$  | $2\nu_9$        | 10 6 4  | 10 5 5  | 2402.0751 | 0.45 | $-0.25 \times 10^{-2}$ | $\nu_3 + \nu_4$ | 9 4 6   | 10 3 7  |
| 2395.8699 | 0.54 | $0.14 \times 10^{-3}$  | $\nu_5 + \nu_7$ | 3 2 1   | 4 2 2   | 2402.1730 | 0.13 | $-0.30 \times 10^{-2}$ | $2\nu_9$        | 8 7 1   | 9 6 4   |
| 2395.9403 | 3.87 | $-0.37 \times 10^{-2}$ | $\nu_3 + \nu_4$ | 11 2 10 | 12 1 11 | 2402.3883 | 0.20 | $0.25 \times 10^{-2}$  | $\nu_5 + \nu_7$ | 10 5 5  | 10 7 4  |
| 2395.9915 | 0.16 | $-0.28 \times 10^{-2}$ | $\nu_3 + \nu_4$ | 12 1 12 | 13 0 13 | 2402.4358 | 1.35 | $-0.76 \times 10^{-3}$ | $\nu_3 + \nu_4$ | 10 7 3  | 11 6 6  |
| 2396.0392 | 5.56 | $-0.49 \times 10^{-2}$ | $\nu_5 + \nu_7$ | 6 4 3   | 7 2 6   | 2402.4669 | 1.62 | $0.39 \times 10^{-2}$  | $2\nu_9$        | 6 4 3   | 7 5 2   |
| 2396.2030 | 0.40 | $-0.19 \times 10^{-2}$ | $\nu_3 + \nu_4$ | 10 5 6  | 11 4 7  | 2402.4909 | 0.35 | $0.51 \times 10^{-2}$  | $\nu_3 + \nu_4$ | 10 8 3  | 11 7 4  |
| 2396.2828 | 1.73 | $-0.56 \times 10^{-2}$ | $2\nu_9$        | 7 4 4   | 8 5 3   | 2402.5626 | 1.51 | $0.31 \times 10^{-2}$  | $\nu_3 + \nu_4$ | 10 8 2  | 11 7 5  |
| 2396.2923 | 2.48 | $0.71 \times 10^{-3}$  | $\nu_3 + \nu_4$ | 11 8 4  | 12 7 5  | 2402.6170 | 3.22 | $0.11 \times 10^{-2}$  | $\nu_5 + \nu_7$ | 12 9 3  | 12 11 2 |
| 2396.2923 | 2.48 | $0.39 \times 10^{-2}$  | $2\nu_9$        | 7 4 4   | 8 5 3   | 2402.6525 | 0.17 | $0.22 \times 10^{-2}$  | $\nu_5 + \nu_7$ | 8 2 7   | 8 4 4   |
| 2396.4337 | 3.43 | $0.18 \times 10^{-2}$  | $\nu_3 + \nu_4$ | 7 6 2   | 8 7 1   | 2402.7129 | 0.40 | $-0.45 \times 10^{-2}$ | $\nu_5 + \nu_7$ | 9 3 7   | 9 5 4   |
| 2396.4711 | 1.42 | $-0.50 \times 10^{-2}$ | $2\nu_9$        | 10 4 6  | 11 5 7  | 2402.7944 | 9.07 | $-0.26 \times 10^{-2}$ | $2\nu_9$        | 7 0 7   | 8 1 8   |
| 2396.4809 | 4.04 | $0.16 \times 10^{-2}$  | $\nu_3 + \nu_4$ | 7 6 1   | 8 7 2   | 2402.7944 | 9.07 | $-0.47 \times 10^{-2}$ | $2\nu_9$        | 7 1 7   | 8 0 8   |
| 2396.4809 | 4.04 | $0.48 \times 10^{-2}$  | $2\nu_9$        | 10 4 6  | 11 5 7  | 2402.8368 | 0.45 | $-0.21 \times 10^{-2}$ | $\nu_5 + \nu_7$ | 14 0 14 | 14 2 13 |
| 2396.4976 | 1.57 | $0.24 \times 10^{-2}$  | $\nu_3 + \nu_4$ | 8 5 3   | 9 6 4   | 2402.8637 | 0.76 | $0.23 \times 10^{-2}$  | $\nu_3 + \nu_4$ | 8 4 4   | 9 5 5   |
| 2396.5260 | 1.19 | $-0.55 \times 10^{-2}$ | $\nu_3 + \nu_4$ | 8 3 6   | 9 4 5   | 2402.9784 | 0.16 | $-0.44 \times 10^{-2}$ | $\nu_3 + \nu_4$ | 7 2 6   | 8 3 5   |
| 2396.5260 | 1.19 | $0.15 \times 10^{-3}$  | $\nu_5 + \nu_7$ | 3 0 3   | 4 0 4   | 2403.1707 | 0.69 | $0.26 \times 10^{-2}$  | $\nu_3 + \nu_4$ | 9 2 7   | 10 3 8  |
| 2396.5902 | 1.98 | $-0.41 \times 10^{-2}$ | $\nu_3 + \nu_4$ | 11 8 3  | 12 7 6  | 2403.2896 | 0.32 | $0.12 \times 10^{-2}$  | $\nu_3 + \nu_4$ | 9 3 7   | 10 2 8  |
| 2396.8334 | 0.18 | $-0.46 \times 10^{-2}$ | $\nu_5 + \nu_7$ | 8 1 8   | 8 3 5   | 2403.3530 | 0.08 | $0.66 \times 10^{-3}$  | $\nu_3 + \nu_4$ | 10 9 2  | 11 8 3  |
| 2396.8478 | 0.50 | $-0.28 \times 10^{-2}$ | $\nu_5 + \nu_7$ | 15 5 10 | 15 7 9  | 2403.3530 | 0.08 | $-0.20 \times 10^{-2}$ | $\nu_3 + \nu_4$ | 10 9 1  | 11 8 4  |
| 2396.8734 | 4.46 | $-0.26 \times 10^{-2}$ | $2\nu_9$        | 8 1 7   | 9 2 8   | 2403.4237 | 0.56 | $0.28 \times 10^{-2}$  | $\nu_3 + \nu_4$ | 14 4 10 | 15 3 13 |
| 2397.1042 | 0.93 | $0.46 \times 10^{-2}$  | $2\nu_9$        | 9 7 2   | 10 6 5  | 2403.4237 | 0.56 | $0.89 \times 10^{-3}$  | $\nu_5 + \nu_7$ | 2 2 0   | 3 2 1   |
| 2397.1546 | 0.86 | $0.13 \times 10^{-2}$  | $\nu_3 + \nu_4$ | 8 4 5   | 9 5 4   | 2403.5234 | 0.74 | $0.13 \times 10^{-2}$  | $2\nu_9$        | 5 0 5   | 6 3 4   |

| (I)       | (II) | (III)                  | (IV)            | (V)     | (VI)    | (I)       | (II) | (III)                  | (IV)            | (V)     | (VI)    |
|-----------|------|------------------------|-----------------|---------|---------|-----------|------|------------------------|-----------------|---------|---------|
| 2403.5234 | 0.74 | $0.14 \times 10^{-3}$  | $2\nu_9$        | 5 5 1   | 6 6 0   | 2408.6391 | 3.33 | $-0.18 \times 10^{-3}$ | $2\nu_9$        | 5 4 1   | 6 5 2   |
| 2403.5328 | 0.55 | $-0.13 \times 10^{-2}$ | $2\nu_9$        | 5 5 0   | 6 6 1   | 2408.6856 | 0.54 | $0.27 \times 10^{-2}$  | $2\nu_9$        | 7 4 4   | 8 3 5   |
| 2403.5563 | 0.91 | $0.22 \times 10^{-2}$  | $2\nu_9$        | 6 4 2   | 7 5 3   | 2408.7303 | 0.47 | $-0.78 \times 10^{-3}$ | $\nu_5 + \nu_7$ | 13 4 10 | 13 4 9  |
| 2403.6766 | 0.16 | $-0.10 \times 10^{-2}$ | $\nu_5 + \nu_7$ | 9 5 4   | 9 7 3   | 2408.7787 | 1.19 | $0.50 \times 10^{-2}$  | $\nu_3 + \nu_4$ | 9 8 1   | 10 7 4  |
| 2403.7270 | 0.35 | $0.12 \times 10^{-2}$  | $\nu_3 + \nu_4$ | 9 5 5   | 10 4 6  | 2408.7930 | 0.47 | $0.10 \times 10^{-4}$  | $\nu_5 + \nu_7$ | 1 1 0   | 2 1 1   |
| 2403.7442 | 0.12 | $0.16 \times 10^{-2}$  | $2\nu_9$        | 4 2 3   | 5 5 0   | 2408.7930 | 0.47 | $0.64 \times 10^{-2}$  | $2\nu_9$        | 6 3 3   | 7 4 4   |
| 2403.8114 | 0.33 | $-0.15 \times 10^{-3}$ | $\nu_5 + \nu_7$ | 15 1 14 | 15 3 13 | 2408.8333 | 0.15 | $0.19 \times 10^{-2}$  | $\nu_5 + \nu_7$ | 2 2 0   | 3 0 3   |
| 2403.9184 | 0.18 | $0.21 \times 10^{-2}$  | $\nu_5 + \nu_7$ | 15 3 13 | 15 3 12 | 2408.9037 | 0.23 | $0.20 \times 10^{-4}$  | $\nu_3 + \nu_4$ | 9 6 3   | 10 5 6  |
| 2403.9473 | 2.09 | $-0.14 \times 10^{-2}$ | $2\nu_9$        | 7 3 4   | 8 4 5   | 2408.9495 | 0.79 | $-0.38 \times 10^{-3}$ | $\nu_5 + \nu_7$ | 1 0 1   | 2 0 2   |
| 2403.9647 | 1.44 | $0.14 \times 10^{-2}$  | $\nu_3 + \nu_4$ | 7 4 4   | 8 5 3   | 2409.0412 | 0.52 | $0.22 \times 10^{-2}$  | $\nu_3 + \nu_4$ | 8 2 6   | 9 3 7   |
| 2404.0254 | 0.48 | $0.99 \times 10^{-3}$  | $\nu_5 + \nu_7$ | 2 2 1   | 3 2 2   | 2409.1075 | 0.64 | $0.74 \times 10^{-3}$  | $\nu_3 + \nu_4$ | 8 4 5   | 9 3 6   |
| 2404.0451 | 1.74 | $-0.11 \times 10^{-2}$ | $2\nu_9$        | 6 3 4   | 7 4 3   | 2409.1961 | 0.26 | $-0.22 \times 10^{-2}$ | $\nu_5 + \nu_7$ | 10 2 8  | 10 4 7  |
| 2404.1352 | 0.27 | $-0.52 \times 10^{-2}$ | $\nu_5 + \nu_7$ | 9 4 5   | 9 6 4   | 2409.2037 | 0.24 | $0.54 \times 10^{-2}$  | $\nu_5 + \nu_7$ | 10 2 8  | 10 4 7  |
| 2404.1642 | 0.15 | $-0.39 \times 10^{-2}$ | $\nu_5 + \nu_7$ | 9 6 3   | 9 8 2   | 2409.2652 | 0.31 | $-0.61 \times 10^{-2}$ | $\nu_3 + \nu_4$ | 11 7 5  | 12 4 8  |
| 2404.2537 | 0.17 | $-0.67 \times 10^{-2}$ | $2\nu_9$        | 8 6 3   | 9 5 4   | 2409.3256 | 1.26 | $0.11 \times 10^{-2}$  | $\nu_3 + \nu_4$ | 5 1 5   | 6 4 2   |
| 2404.3090 | 0.82 | $-0.15 \times 10^{-2}$ | $\nu_3 + \nu_4$ | 10 10 1 | 11 9 2  | 2409.3256 | 1.26 | $-0.49 \times 10^{-3}$ | $\nu_3 + \nu_4$ | 8 3 6   | 9 2 7   |
| 2404.3090 | 0.82 | $-0.15 \times 10^{-2}$ | $\nu_3 + \nu_4$ | 10 10 0 | 11 9 3  | 2409.4024 | 0.13 | $0.50 \times 10^{-4}$  | $\nu_5 + \nu_7$ | 5 2 4   | 5 4 1   |
| 2404.3681 | 0.24 | $-0.19 \times 10^{-2}$ | $\nu_5 + \nu_7$ | 14 2 13 | 14 2 12 | 2409.6329 | 0.75 | $-0.95 \times 10^{-3}$ | $\nu_5 + \nu_7$ | 10 1 9  | 10 3 8  |
| 2404.7191 | 9.07 | $-0.12 \times 10^{-2}$ | $2\nu_9$        | 7 1 6   | 8 2 7   | 2409.7183 | 0.82 | $0.31 \times 10^{-2}$  | $\nu_5 + \nu_7$ | 7 7 1   | 8 5 4   |
| 2404.7731 | 3.76 | $-0.47 \times 10^{-2}$ | $2\nu_9$        | 7 2 6   | 8 1 7   | 2409.8105 | 0.47 | $0.40 \times 10^{-2}$  | $\nu_5 + \nu_7$ | 9 2 7   | 9 4 6   |
| 2404.7942 | 0.55 | $-0.28 \times 10^{-2}$ | $\nu_3 + \nu_4$ | 10 6 4  | 11 5 7  | 2409.8365 | 3.08 | $0.30 \times 10^{-2}$  | $\nu_3 + \nu_4$ | 6 1 6   | 7 2 5   |
| 2404.7942 | 0.55 | $0.69 \times 10^{-3}$  | $2\nu_9$        | 5 1 4   | 6 4 3   | 2409.8365 | 3.08 | $0.54 \times 10^{-2}$  | $\nu_5 + \nu_7$ | 1 1 1   | 2 1 2   |
| 2404.8107 | 0.17 | $0.49 \times 10^{-2}$  | $\nu_5 + \nu_7$ | 15 4 12 | 15 4 11 | 2409.8873 | 0.13 | $-0.57 \times 10^{-2}$ | $\nu_5 + \nu_7$ | 9 0 9   | 9 2 8   |
| 2404.8530 | 0.21 | $-0.24 \times 10^{-2}$ | $\nu_5 + \nu_7$ | 8 3 6   | 8 5 3   | 2409.9082 | 0.17 | $-0.32 \times 10^{-2}$ | $\nu_3 + \nu_4$ | 10 5 5  | 11 4 8  |
| 2404.9669 | 0.11 | $0.26 \times 10^{-3}$  | $\nu_5 + \nu_7$ | 4 3 2   | 5 1 5   | 2409.9236 | 0.14 | $-0.29 \times 10^{-2}$ | $\nu_5 + \nu_7$ | 9 1 9   | 9 1 8   |
| 2405.0560 | 0.81 | $0.35 \times 10^{-2}$  | $\nu_3 + \nu_4$ | 7 3 5   | 8 4 4   | 2409.9614 | 1.00 | $-0.54 \times 10^{-2}$ | $\nu_5 + \nu_7$ | 10 2 9  | 10 2 8  |
| 2405.1105 | 0.30 | $-0.36 \times 10^{-2}$ | $\nu_5 + \nu_7$ | 8 4 4   | 8 6 3   | 2410.1253 | 0.16 | $-0.43 \times 10^{-2}$ | $2\nu_9$        | 7 6 2   | 8 5 3   |
| 2405.2292 | 0.39 | $0.63 \times 10^{-3}$  | $\nu_5 + \nu_7$ | 10 8 2  | 10 10 1 | 2410.2511 | 0.31 | $0.30 \times 10^{-2}$  | $\nu_5 + \nu_7$ | 8 2 6   | 8 4 5   |
| 2405.4120 | 0.23 | $-0.43 \times 10^{-2}$ | $\nu_3 + \nu_4$ | 10 1 10 | 11 0 11 | 2410.2685 | 2.75 | $0.31 \times 10^{-2}$  | $\nu_3 + \nu_4$ | 6 4 3   | 7 5 2   |
| 2405.5967 | 2.75 | $-0.47 \times 10^{-2}$ | $2\nu_9$        | 7 2 5   | 8 3 6   | 2410.3284 | 7.01 | $0.26 \times 10^{-2}$  | $\nu_5 + \nu_7$ | 3 3 1   | 4 1 4   |
| 2405.6407 | 0.30 | $0.18 \times 10^{-2}$  | $2\nu_9$        | 5 1 5   | 6 2 4   | 2410.3531 | 0.70 | $-0.58 \times 10^{-3}$ | $2\nu_9$        | 7 6 1   | 8 5 4   |
| 2405.6733 | 0.13 | $-0.33 \times 10^{-2}$ | $\nu_5 + \nu_7$ | 13 3 10 | 13 3 11 | 2410.4612 | 0.79 | $0.12 \times 10^{-2}$  | $2\nu_9$        | 5 2 4   | 6 3 3   |
| 2405.7008 | 0.33 | $-0.26 \times 10^{-2}$ | $\nu_5 + \nu_7$ | 13 2 12 | 13 2 11 | 2410.5164 | 0.16 | $0.56 \times 10^{-2}$  | $2\nu_9$        | 7 5 3   | 8 4 4   |
| 2405.7917 | 4.03 | $0.20 \times 10^{-2}$  | $\nu_5 + \nu_7$ | 12 1 12 | 12 1 11 | 2410.5667 | 0.55 | $0.41 \times 10^{-2}$  | $\nu_5 + \nu_7$ | 7 2 5   | 7 4 4   |
| 2405.8327 | 0.08 | $-0.38 \times 10^{-2}$ | $\nu_3 + \nu_4$ | 11 8 3  | 11 11 0 | 2410.7368 | 2.35 | $0.25 \times 10^{-2}$  | $\nu_3 + \nu_4$ | 5 2 3   | 6 5 2   |
| 2405.9521 | 1.18 | $0.41 \times 10^{-2}$  | $2\nu_9$        | 4 1 4   | 5 4 1   | 2410.7918 | 0.19 | $-0.42 \times 10^{-3}$ | $\nu_5 + \nu_7$ | 6 2 4   | 6 4 3   |
| 2406.0768 | 0.26 | $0.36 \times 10^{-3}$  | $\nu_5 + \nu_7$ | 7 4 3   | 7 6 2   | 2410.8152 | 0.16 | $0.25 \times 10^{-3}$  | $2\nu_9$        | 9 4 5   | 10 3 8  |
| 2406.0920 | 0.98 | $-0.26 \times 10^{-2}$ | $2\nu_9$        | 13 3 11 | 13 6 8  | 2410.8774 | 0.53 | $0.44 \times 10^{-2}$  | $\nu_5 + \nu_7$ | 9 1 8   | 9 3 7   |
| 2406.2484 | 3.61 | $-0.83 \times 10^{-3}$ | $\nu_3 + \nu_4$ | 6 5 2   | 7 6 1   | 2410.9181 | 9.07 | $-0.38 \times 10^{-2}$ | $2\nu_9$        | 6 1 6   | 7 0 7   |
| 2406.2716 | 1.32 | $-0.36 \times 10^{-2}$ | $\nu_3 + \nu_4$ | 9 1 8   | 10 2 9  | 2410.9181 | 9.07 | $0.40 \times 10^{-3}$  | $2\nu_9$        | 6 0 6   | 7 1 7   |
| 2406.2976 | 3.42 | $0.22 \times 10^{-2}$  | $\nu_5 + \nu_7$ | 5 5 0   | 6 3 3   | 2410.9827 | 0.14 | $0.12 \times 10^{-2}$  | $\nu_5 + \nu_7$ | 5 2 3   | 5 4 2   |
| 2406.3784 | 0.67 | $-0.27 \times 10^{-2}$ | $\nu_3 + \nu_4$ | 9 6 4   | 10 5 5  | 2411.1499 | 0.43 | $0.37 \times 10^{-2}$  | $\nu_3 + \nu_4$ | 8 5 4   | 9 4 5   |
| 2406.4035 | 2.50 | $0.63 \times 10^{-3}$  | $\nu_3 + \nu_4$ | 6 5 1   | 7 6 2   | 2411.1662 | 2.27 | $0.24 \times 10^{-2}$  | $2\nu_9$        | 10 3 7  | 11 2 10 |
| 2406.4373 | 2.14 | $-0.19 \times 10^{-2}$ | $2\nu_9$        | 7 3 5   | 8 2 6   | 2411.2360 | 0.13 | $0.10 \times 10^{-2}$  | $2\nu_9$        | 10 4 7  | 11 1 10 |
| 2406.6099 | 0.68 | $0.46 \times 10^{-2}$  | $\nu_5 + \nu_7$ | 14 4 11 | 14 4 10 | 2411.2857 | 1.35 | $-0.21 \times 10^{-3}$ | $2\nu_9$        | 5 3 3   | 6 4 2   |
| 2406.8109 | 0.66 | $0.14 \times 10^{-2}$  | $\nu_3 + \nu_4$ | 8 3 5   | 9 4 6   | 2411.4520 | 0.15 | $0.28 \times 10^{-2}$  | $2\nu_9$        | 15 1 14 | 15 2 13 |
| 2406.8109 | 0.66 | $0.14 \times 10^{-2}$  | $2\nu_9$        | 8 5 3   | 9 4 6   | 2411.4520 | 0.15 | $-0.47 \times 10^{-2}$ | $2\nu_9$        | 15 2 14 | 15 3 13 |
| 2406.8276 | 0.10 | $0.22 \times 10^{-3}$  | $2\nu_9$        | 4 2 2   | 5 5 1   | 2411.5594 | 0.16 | $0.87 \times 10^{-3}$  | $\nu_5 + \nu_7$ | 9 2 8   | 9 2 7   |
| 2406.9750 | 0.29 | $-0.36 \times 10^{-2}$ | $\nu_5 + \nu_7$ | 8 3 5   | 8 5 4   | 2411.7181 | 1.57 | $0.27 \times 10^{-2}$  | $\nu_3 + \nu_4$ | 6 4 2   | 7 5 3   |
| 2406.9750 | 0.29 | $0.36 \times 10^{-2}$  | $\nu_5 + \nu_7$ | 6 4 2   | 6 6 1   | 2411.7468 | 0.85 | $-0.41 \times 10^{-2}$ | $\nu_3 + \nu_4$ | 8 1 7   | 9 2 8   |
| 2407.0034 | 0.35 | $-0.24 \times 10^{-2}$ | $\nu_5 + \nu_7$ | 12 3 9  | 12 3 10 | 2411.7658 | 0.44 | $-0.40 \times 10^{-2}$ | $\nu_3 + \nu_4$ | 8 2 7   | 9 1 8   |
| 2407.1600 | 0.16 | $0.22 \times 10^{-3}$  | $\nu_5 + \nu_7$ | 11 1 11 | 11 1 10 | 2411.8735 | 2.37 | $-0.30 \times 10^{-2}$ | $2\nu_9$        | 6 2 4   | 7 3 5   |
| 2407.2238 | 1.34 | $0.23 \times 10^{-2}$  | $\nu_3 + \nu_4$ | 7 4 3   | 8 5 4   | 2411.8911 | 0.28 | $0.43 \times 10^{-2}$  | $\nu_3 + \nu_4$ | 11 4 7  | 12 3 10 |
| 2407.3975 | 0.19 | $0.19 \times 10^{-2}$  | $\nu_5 + \nu_7$ | 14 1 14 | 14 1 13 | 2411.9005 | 0.22 | $-0.55 \times 10^{-2}$ | $\nu_3 + \nu_4$ | 11 5 7  | 12 2 10 |
| 2407.3975 | 0.19 | $-0.28 \times 10^{-3}$ | $\nu_5 + \nu_7$ | 12 2 10 | 12 4 9  | 2411.9967 | 0.20 | $0.55 \times 10^{-2}$  | $\nu_5 + \nu_7$ | 8 1 7   | 8 3 6   |
| 2407.4543 | 0.20 | $-0.40 \times 10^{-2}$ | $\nu_5 + \nu_7$ | 7 3 4   | 7 5 3   | 2412.0664 | 0.66 | $-0.42 \times 10^{-2}$ | $\nu_3 + \nu_4$ | 6 2 5   | 7 3 4   |
| 2407.5945 | 3.58 | $-0.69 \times 10^{-2}$ | $\nu_3 + \nu_4$ | 6 1 5   | 7 4 4   | 2412.1113 | 9.07 | $0.11 \times 10^{-3}$  | $2\nu_9$        | 6 1 5   | 7 2 6   |
| 2407.7179 | 1.60 | $-0.32 \times 10^{-2}$ | $2\nu_9$        | 10 4 6  | 11 3 9  | 2412.2499 | 0.34 | $0.16 \times 10^{-2}$  | $2\nu_9$        | 4 1 3   | 5 4 2   |
| 2407.8602 | 0.12 | $0.11 \times 10^{-2}$  | $\nu_3 + \nu_4$ | 9 7 3   | 10 6 4  | 2412.2673 | 9.07 | $-0.96 \times 10^{-3}$ | $2\nu_9$        | 6 2 5   | 7 1 6   |
| 2408.0040 | 1.01 | $-0.40 \times 10^{-2}$ | $\nu_5 + \nu_7$ | 5 5 1   | 6 3 4   | 2412.3116 | 5.08 | $-0.16 \times 10^{-2}$ | $\nu_3 + \nu_4$ | 5 5 1   | 6 6 0   |
| 2408.2484 | 0.25 | $0.33 \times 10^{-2}$  | $2\nu_9$        | 10 6 4  | 10 3 7  | 2412.3116 | 5.08 | $0.13 \times 10^{-2}$  | $\nu_3 + \nu_4$ | 7 3 4   | 8 4 5   |
| 2408.3604 | 1.13 | $0.34 \times 10^{-2}$  | $2\nu_9$        | 5 4 2   | 6 5 1   | 2412.3285 | 3.93 | $-0.75 \times 10^{-3}$ | $\nu_3 + \nu_4$ | 5 5 0   | 6 6 1   |
| 2408.4683 | 0.11 | $-0.16 \times 10^{-2}$ | $\nu_5 + \nu_7$ | 5 3 3   | 5 5 0   | 2412.4216 | 0.10 | $-0.16 \times 10^{-2}$ | $\nu_5 + \nu_7$ | 15 1 15 | 15 1 14 |
| 2408.5199 | 0.74 | $-0.59 \times 10^{-3}$ | $\nu_5 + \nu_7$ | 10 0 10 | 10 2 9  | 2412.4216 | 0.10 | $-0.31 \times 10^{-2}$ | $2\nu_9$        | 10 2 8  | 11 1 11 |
| 2408.5667 | 0.72 | $0.44 \times 10^{-3}$  | $\nu_3 + \nu_4$ | 6 0 6   | 7 3 5   | 2412.4216 | 0.10 | $0.69 \times 10^{-3}$  | $2\nu_9$        | 10 3 8  | 11 0 11 |
| 2408.5987 | 0.17 | $0.59 \times 10^{-2}$  | $\nu_5 + \nu_7$ | 5 1 5   | 5 3 2   | 2412.5333 | 0.10 | $0.48 \times 10^{-2}$  | $\nu_3 + \nu_4$ | 10 7 4  | 10 10 1 |
| 2408.5987 | 0.17 | $0.26 \times 10^{-2}$  | $\nu_5 + \nu_7$ | 6 6 1   | 7 4 4   | 2412.5333 | 0.10 | $0.27 \times 10^{-2}$  | $\nu_5 + \nu_7$ | 3 1 3   | 3 3 0   |

| (I)       | (II) | (III)                  | (IV)            | (V)     | (VI)    | (I)       | (II) | (III)                  | (IV)            | (V)     | (VI)    |
|-----------|------|------------------------|-----------------|---------|---------|-----------|------|------------------------|-----------------|---------|---------|
| 2412.6297 | 0.26 | $-0.42 \times 10^{-3}$ | $\nu_5 + \nu_7$ | 7 0 7   | 7 2 6   | 2420.6610 | 0.49 | $0.36 \times 10^{-2}$  | $\nu_3 + \nu_4$ | 7 5 2   | 8 4 5   |
| 2412.8197 | 3.71 | $-0.47 \times 10^{-2}$ | $\nu_5 + \nu_7$ | 7 1 7   | 7 1 6   | 2420.7231 | 0.97 | $0.66 \times 10^{-2}$  | $\nu_3 + \nu_4$ | 7 1 7   | 8 0 8   |
| 2412.8524 | 0.98 | $0.12 \times 10^{-3}$  | $\nu_3 + \nu_4$ | 6 3 4   | 7 4 3   | 2420.8679 | 2.52 | $0.12 \times 10^{-2}$  | $2\nu_9$        | 5 3 3   | 6 2 4   |
| 2412.9266 | 0.22 | $0.31 \times 10^{-2}$  | $\nu_5 + \nu_7$ | 7 1 6   | 7 3 5   | 2420.8936 | 0.14 | $0.26 \times 10^{-2}$  | $\nu_5 + \nu_7$ | 11 5 7  | 11 5 6  |
| 2413.0203 | 0.33 | $0.24 \times 10^{-2}$  | $2\nu_9$        | 4 0 4   | 5 3 3   | 2421.1088 | 1.06 | $0.13 \times 10^{-2}$  | $\nu_3 + \nu_4$ | 6 2 4   | 7 3 5   |
| 2413.1404 | 0.18 | $0.90 \times 10^{-3}$  | $\nu_3 + \nu_4$ | 8 6 3   | 9 5 4   | 2421.2569 | 0.26 | $-0.47 \times 10^{-2}$ | $2\nu_9$        | 10 3 7  | 10 4 6  |
| 2413.1520 | 0.18 | $-0.24 \times 10^{-2}$ | $\nu_5 + \nu_9$ | 14 7 7  | 15 10 5 | 2421.3315 | 0.28 | $-0.28 \times 10^{-3}$ | $\nu_5 + \nu_7$ | 4 2 3   | 4 2 2   |
| 2413.3344 | 0.10 | $0.29 \times 10^{-2}$  | $\nu_5 + \nu_7$ | 8 2 7   | 8 2 6   | 2421.4238 | 0.09 | $-0.34 \times 10^{-3}$ | $\nu_3 + \nu_4$ | 8 4 4   | 9 3 7   |
| 2413.5165 | 1.53 | $0.27 \times 10^{-2}$  | $2\nu_9$        | 5 3 2   | 6 4 3   | 2421.4446 | 0.12 | $-0.28 \times 10^{-2}$ | $2\nu_9$        | 8 8 1   | 9 5 4   |
| 2413.6330 | 0.18 | $0.41 \times 10^{-2}$  | $\nu_5 + \nu_7$ | 6 1 5   | 6 3 4   | 2421.6633 | 0.15 | $-0.61 \times 10^{-2}$ | $\nu_3 + \nu_4$ | 11 6 6  | 11 9 3  |
| 2413.6854 | 1.87 | $-0.12 \times 10^{-2}$ | $2\nu_9$        | 6 3 4   | 7 2 5   | 2421.6943 | 2.83 | $-0.46 \times 10^{-2}$ | $2\nu_9$        | 3 0 3   | 4 3 2   |
| 2413.9525 | 0.29 | $-0.25 \times 10^{-2}$ | $\nu_5 + \nu_7$ | 15 6 10 | 15 6 9  | 2421.8124 | 0.61 | $0.49 \times 10^{-2}$  | $\nu_5 + \nu_9$ | 16 0 16 | 17 1 16 |
| 2414.0406 | 1.70 | $0.37 \times 10^{-2}$  | $\nu_3 + \nu_4$ | 8 6 2   | 9 5 5   | 2421.9647 | 0.27 | $-0.31 \times 10^{-2}$ | $\nu_5 + \nu_7$ | 6 3 4   | 6 3 3   |
| 2414.1110 | 0.15 | $0.17 \times 10^{-2}$  | $\nu_5 + \nu_7$ | 5 1 4   | 5 3 3   | 2421.9647 | 0.27 | $0.34 \times 10^{-2}$  | $2\nu_9$        | 8 2 6   | 9 1 9   |
| 2414.2428 | 1.10 | $0.17 \times 10^{-2}$  | $2\nu_9$        | 4 4 1   | 5 5 0   | 2422.0083 | 2.99 | $-0.33 \times 10^{-2}$ | $2\nu_9$        | 8 3 6   | 9 0 9   |
| 2414.2747 | 0.88 | $-0.11 \times 10^{-2}$ | $2\nu_9$        | 4 4 0   | 5 5 1   | 2422.0286 | 1.29 | $-0.17 \times 10^{-2}$ | $\nu_5 + \nu_7$ | 1 1 1   | 1 1 0   |
| 2414.3994 | 0.12 | $0.23 \times 10^{-2}$  | $\nu_5 + \nu_7$ | 4 1 3   | 4 3 2   | 2422.2711 | 1.71 | $0.12 \times 10^{-2}$  | $\nu_3 + \nu_4$ | 5 3 2   | 6 4 3   |
| 2414.5284 | 3.97 | $-0.49 \times 10^{-2}$ | $\nu_5 + \nu_7$ | 3 1 2   | 3 3 1   | 2422.3259 | 0.38 | $-0.12 \times 10^{-2}$ | $\nu_3 + \nu_4$ | 4 1 3   | 5 4 2   |
| 2414.7797 | 0.30 | $-0.17 \times 10^{-2}$ | $2\nu_9$        | 3 1 3   | 4 4 0   | 2422.3372 | 0.48 | $-0.64 \times 10^{-2}$ | $\nu_3 + \nu_4$ | 11 9 3  | 12 6 6  |
| 2414.9208 | 0.18 | $-0.42 \times 10^{-2}$ | $\nu_3 + \nu_4$ | 11 8 4  | 12 5 7  | 2422.3484 | 0.31 | $0.48 \times 10^{-2}$  | $\nu_3 + \nu_4$ | 11 9 3  | 12 6 6  |
| 2415.0676 | 1.10 | $0.76 \times 10^{-3}$  | $\nu_3 + \nu_4$ | 7 2 5   | 8 3 6   | 2422.4289 | 6.69 | $-0.15 \times 10^{-2}$ | $\nu_3 + \nu_4$ | 4 4 1   | 5 5 0   |
| 2415.1230 | 1.08 | $0.68 \times 10^{-2}$  | $\nu_3 + \nu_4$ | 11 7 4  | 11 10 1 | 2422.4845 | 3.44 | $-0.27 \times 10^{-2}$ | $\nu_3 + \nu_4$ | 4 4 0   | 5 5 1   |
| 2415.2000 | 0.61 | $-0.42 \times 10^{-2}$ | $\nu_3 + \nu_4$ | 5 1 4   | 6 4 3   | 2422.5093 | 0.21 | $0.15 \times 10^{-2}$  | $2\nu_9$        | 13 1 12 | 13 2 11 |
| 2415.2091 | 0.42 | $0.49 \times 10^{-2}$  | $\nu_3 + \nu_4$ | 5 1 4   | 6 4 3   | 2422.6738 | 0.43 | $0.30 \times 10^{-2}$  | $\nu_5 + \nu_7$ | 13 5 8  | 13 5 9  |
| 2415.2091 | 0.42 | $-0.26 \times 10^{-2}$ | $\nu_3 + \nu_4$ | 10 4 6  | 11 3 9  | 2422.6934 | 0.78 | $0.20 \times 10^{-3}$  | $\nu_5 + \nu_7$ | 3 2 2   | 3 2 1   |
| 2415.4711 | 0.57 | $-0.67 \times 10^{-3}$ | $\nu_5 + \nu_7$ | 0 0 0   | 1 0 1   | 2422.7421 | 0.24 | $-0.42 \times 10^{-2}$ | $2\nu_9$        | 5 4 2   | 6 3 3   |
| 2415.5143 | 0.18 | $0.43 \times 10^{-2}$  | $\nu_3 + \nu_4$ | 10 5 6  | 11 2 9  | 2422.7704 | 1.32 | $0.20 \times 10^{-4}$  | $2\nu_9$        | 4 2 2   | 5 3 3   |
| 2415.5747 | 1.84 | $-0.52 \times 10^{-2}$ | $2\nu_9$        | 6 6 1   | 7 5 2   | 2422.8150 | 0.69 | $-0.70 \times 10^{-4}$ | $\nu_5 + \nu_7$ | 1 1 0   | 1 1 1   |
| 2415.6410 | 0.15 | $0.62 \times 10^{-2}$  | $2\nu_9$        | 6 6 0   | 7 5 3   | 2422.8283 | 0.25 | $-0.38 \times 10^{-3}$ | $\nu_5 + \nu_7$ | 8 4 5   | 8 4 4   |
| 2415.7393 | 1.35 | $0.55 \times 10^{-2}$  | $\nu_3 + \nu_4$ | 7 3 5   | 8 2 6   | 2422.8777 | 0.14 | $-0.31 \times 10^{-2}$ | $\nu_5 + \nu_7$ | 14 5 9  | 14 5 10 |
| 2415.8104 | 0.48 | $0.29 \times 10^{-2}$  | $2\nu_9$        | 6 4 3   | 7 3 4   | 2422.8866 | 0.14 | $0.58 \times 10^{-2}$  | $\nu_5 + \nu_7$ | 14 5 9  | 14 5 10 |
| 2415.9792 | 0.28 | $0.62 \times 10^{-2}$  | $\nu_3 + \nu_4$ | 10 7 4  | 11 4 7  | 2423.1531 | 0.16 | $0.59 \times 10^{-2}$  | $\nu_5 + \nu_7$ | 12 5 7  | 12 5 8  |
| 2416.0874 | 1.09 | $0.54 \times 10^{-2}$  | $\nu_5 + \nu_7$ | 5 1 5   | 5 1 4   | 2423.1988 | 0.35 | $0.46 \times 10^{-2}$  | $2\nu_9$        | 7 4 4   | 8 1 7   |
| 2416.2663 | 0.14 | $0.17 \times 10^{-2}$  | $\nu_3 + \nu_4$ | 4 2 2   | 5 5 1   | 2423.2500 | 0.14 | $-0.26 \times 10^{-2}$ | $2\nu_9$        | 5 5 0   | 6 4 3   |
| 2416.3425 | 2.31 | $0.14 \times 10^{-2}$  | $\nu_3 + \nu_4$ | 5 4 2   | 6 5 1   | 2423.3564 | 0.94 | $0.57 \times 10^{-3}$  | $\nu_3 + \nu_4$ | 6 1 5   | 7 2 6   |
| 2416.3425 | 2.31 | $0.16 \times 10^{-2}$  | $\nu_3 + \nu_4$ | 15 2 13 | 16 1 16 | 2423.3732 | 0.62 | $0.37 \times 10^{-3}$  | $\nu_5 + \nu_7$ | 2 1 1   | 2 1 2   |
| 2416.3608 | 0.47 | $0.29 \times 10^{-2}$  | $\nu_3 + \nu_4$ | 7 4 4   | 8 3 5   | 2423.4758 | 1.26 | $-0.38 \times 10^{-2}$ | $\nu_3 + \nu_4$ | 6 2 5   | 7 1 6   |
| 2416.7603 | 2.98 | $0.16 \times 10^{-2}$  | $\nu_3 + \nu_4$ | 5 4 1   | 6 5 2   | 2423.5421 | 0.98 | $0.11 \times 10^{-2}$  | $\nu_5 + \nu_7$ | 2 2 1   | 2 2 0   |
| 2416.8906 | 0.26 | $0.31 \times 10^{-2}$  | $2\nu_9$        | 6 5 2   | 7 4 3   | 2423.6069 | 1.29 | $-0.30 \times 10^{-2}$ | $\nu_3 + \nu_4$ | 6 4 3   | 7 3 4   |
| 2417.2475 | 0.12 | $-0.25 \times 10^{-2}$ | $\nu_5 + \nu_7$ | 8 3 6   | 8 3 5   | 2423.6069 | 1.29 | $-0.66 \times 10^{-2}$ | $\nu_3 + \nu_4$ | 9 3 6   | 10 2 9  |
| 2417.2475 | 0.12 | $0.95 \times 10^{-3}$  | $\nu_5 + \nu_7$ | 10 4 7  | 10 4 6  | 2423.6069 | 1.29 | $0.10 \times 10^{-2}$  | $\nu_5 + \nu_7$ | 3 2 1   | 3 2 2   |
| 2417.3926 | 0.89 | $-0.65 \times 10^{-2}$ | $\nu_3 + \nu_4$ | 6 3 3   | 7 4 4   | 2423.6069 | 1.29 | $0.55 \times 10^{-2}$  | $\nu_5 + \nu_7$ | 10 4 6  | 10 4 7  |
| 2417.4449 | 0.93 | $-0.44 \times 10^{-2}$ | $\nu_3 + \nu_4$ | 7 1 6   | 8 2 7   | 2423.6983 | 1.29 | $-0.28 \times 10^{-2}$ | $\nu_5 + \nu_7$ | 5 3 3   | 5 3 2   |
| 2417.4793 | 1.26 | $-0.55 \times 10^{-2}$ | $\nu_5 + \nu_7$ | 12 5 8  | 12 5 7  | 2423.6983 | 1.29 | $0.30 \times 10^{-3}$  | $\nu_5 + \nu_7$ | 4 2 2   | 4 2 3   |
| 2417.7886 | 0.43 | $0.61 \times 10^{-2}$  | $\nu_3 + \nu_4$ | 4 1 4   | 5 4 1   | 2423.7417 | 1.34 | $0.70 \times 10^{-3}$  | $\nu_5 + \nu_7$ | 2 2 0   | 2 2 1   |
| 2417.8758 | 1.52 | $-0.34 \times 10^{-2}$ | $2\nu_9$        | 4 3 2   | 5 4 1   | 2423.8292 | 0.22 | $-0.17 \times 10^{-2}$ | $\nu_5 + \nu_7$ | 11 4 7  | 11 4 8  |
| 2418.6077 | 2.11 | $0.14 \times 10^{-3}$  | $2\nu_9$        | 4 3 1   | 5 4 2   | 2423.8292 | 0.22 | $-0.60 \times 10^{-4}$ | $\nu_5 + \nu_7$ | 10 5 6  | 10 5 5  |
| 2418.6214 | 9.07 | $0.13 \times 10^{-2}$  | $2\nu_9$        | 5 0 5   | 6 1 6   | 2423.9655 | 1.73 | $-0.22 \times 10^{-2}$ | $\nu_5 + \nu_7$ | 7 3 4   | 7 3 5   |
| 2418.6351 | 2.90 | $0.74 \times 10^{-3}$  | $2\nu_9$        | 5 1 5   | 6 0 6   | 2424.1400 | 1.37 | $0.84 \times 10^{-3}$  | $2\nu_9$        | 3 3 1   | 4 4 0   |
| 2418.6982 | 0.12 | $-0.20 \times 10^{-2}$ | $2\nu_9$        | 8 3 5   | 9 2 8   | 2424.2581 | 0.53 | $0.23 \times 10^{-2}$  | $\nu_5 + \nu_7$ | 3 1 2   | 3 1 3   |
| 2418.9269 | 1.72 | $0.23 \times 10^{-2}$  | $2\nu_9$        | 10 4 6  | 11 3 9  | 2424.2691 | 1.45 | $-0.18 \times 10^{-3}$ | $2\nu_9$        | 3 3 0   | 4 4 1   |
| 2418.9743 | 1.36 | $0.58 \times 10^{-3}$  | $2\nu_9$        | 4 2 3   | 5 3 2   | 2424.2823 | 0.46 | $-0.37 \times 10^{-2}$ | $\nu_5 + \nu_7$ | 8 3 5   | 8 3 6   |
| 2419.0223 | 4.03 | $-0.10 \times 10^{-4}$ | $2\nu_9$        | 5 1 4   | 6 2 5   | 2424.3004 | 0.10 | $-0.25 \times 10^{-2}$ | $\nu_3 + \nu_4$ | 11 2 9  | 12 1 12 |
| 2419.0480 | 0.64 | $-0.49 \times 10^{-2}$ | $2\nu_9$        | 8 5 3   | 8 8 0   | 2424.3289 | 0.12 | $-0.32 \times 10^{-2}$ | $2\nu_9$        | 8 0 8   | 8 3 5   |
| 2419.4502 | 2.67 | $0.62 \times 10^{-2}$  | $2\nu_9$        | 12 0 12 | 12 1 11 | 2424.5279 | 0.35 | $-0.11 \times 10^{-2}$ | $\nu_3 + \nu_4$ | 7 4 3   | 8 3 6   |
| 2419.4502 | 2.67 | $0.16 \times 10^{-3}$  | $2\nu_9$        | 5 2 4   | 6 1 5   | 2424.5279 | 0.35 | $0.50 \times 10^{-2}$  | $\nu_5 + \nu_7$ | 13 6 7  | 13 6 8  |
| 2419.4832 | 1.01 | $0.49 \times 10^{-2}$  | $\nu_3 + \nu_4$ | 9 6 4   | 9 9 1   | 2424.5638 | 0.62 | $-0.20 \times 10^{-2}$ | $\nu_5 + \nu_7$ | 5 3 2   | 5 3 3   |
| 2419.4832 | 1.01 | $0.21 \times 10^{-2}$  | $2\nu_9$        | 9 5 4   | 9 8 1   | 2424.7096 | 2.21 | $-0.48 \times 10^{-2}$ | $\nu_5 + \nu_7$ | 8 4 4   | 8 4 5   |
| 2419.5340 | 0.19 | $-0.18 \times 10^{-3}$ | $\nu_5 + \nu_7$ | 5 2 4   | 5 2 3   | 2424.7288 | 1.09 | $-0.30 \times 10^{-2}$ | $2\nu_9$        | 5 4 1   | 6 3 4   |
| 2419.5814 | 0.50 | $-0.18 \times 10^{-2}$ | $\nu_5 + \nu_7$ | 3 1 3   | 3 1 2   | 2424.7638 | 0.32 | $0.15 \times 10^{-2}$  | $2\nu_9$        | 11 0 11 | 11 1 10 |
| 2419.6599 | 1.17 | $0.26 \times 10^{-2}$  | $\nu_3 + \nu_4$ | 7 6 2   | 8 5 3   | 2424.7638 | 0.32 | $0.36 \times 10^{-2}$  | $2\nu_9$        | 11 1 11 | 11 2 10 |
| 2419.7560 | 0.24 | $-0.30 \times 10^{-2}$ | $\nu_5 + \nu_7$ | 7 3 5   | 7 3 4   | 2424.9090 | 2.56 | $-0.48 \times 10^{-2}$ | $\nu_5 + \nu_7$ | 7 4 4   | 7 4 3   |
| 2419.9142 | 4.31 | $0.55 \times 10^{-2}$  | $\nu_3 + \nu_4$ | 5 3 3   | 6 4 2   | 2424.9654 | 2.26 | $-0.21 \times 10^{-2}$ | $\nu_5 + \nu_7$ | 12 6 7  | 12 6 6  |
| 2419.9142 | 4.31 | $0.36 \times 10^{-2}$  | $\nu_3 + \nu_4$ | 7 6 1   | 8 5 4   | 2425.0212 | 0.66 | $0.18 \times 10^{-3}$  | $\nu_5 + \nu_7$ | 6 2 4   | 6 2 5   |
| 2420.4110 | 0.14 | $-0.57 \times 10^{-3}$ | $\nu_3 + \nu_4$ | 10 4 7  | 11 1 10 | 2425.0920 | 0.10 | $-0.91 \times 10^{-3}$ | $\nu_3 + \nu_4$ | 8 6 3   | 9 3 6   |
| 2420.5106 | 0.10 | $0.67 \times 10^{-2}$  | $\nu_3 + \nu_4$ | 9 6 3   | 9 9 0   | 2425.1418 | 1.35 | $-0.28 \times 10^{-2}$ | $\nu_5 + \nu_7$ | 9 3 6   | 9 3 7   |
| 2420.5900 | 1.70 | $0.32 \times 10^{-2}$  | $\nu_3 + \nu_4$ | 7 7 0   | 8 6 3   | 2425.1418 | 1.35 | $0.30 \times 10^{-4}$  | $\nu_5 + \nu_7$ | 4 3 1   | 4 3 2   |

| (I)       | (II) | (III)                  | (IV)            | (V)     | (VI)    | (I)       | (II) | (III)                  | (IV)            | (V)     | (VI)    |
|-----------|------|------------------------|-----------------|---------|---------|-----------|------|------------------------|-----------------|---------|---------|
| 2425.1700 | 0.20 | $0.56 \times 10^{-3}$  | $\nu_3 + \nu_4$ | 6 5 2   | 7 4 3   | 2429.4736 | 0.21 | $0.58 \times 10^{-2}$  | $\nu_5 + \nu_9$ | 15 0 15 | 16 1 15 |
| 2425.4145 | 2.24 | $-0.90 \times 10^{-4}$ | $2\nu_9$        | 4 1 3   | 5 2 4   | 2429.4736 | 0.21 | $0.14 \times 10^{-2}$  | $2\nu_9$        | 4 4 1   | 5 3 2   |
| 2425.4657 | 0.93 | $0.14 \times 10^{-2}$  | $\nu_5 + \nu_7$ | 10 5 5  | 10 5 6  | 2429.4911 | 0.63 | $0.15 \times 10^{-2}$  | $\nu_3 + \nu_4$ | 5 3 3   | 6 2 4   |
| 2425.4766 | 0.57 | $0.16 \times 10^{-2}$  | $\nu_5 + \nu_7$ | 4 1 3   | 4 1 4   | 2429.5215 | 0.71 | $0.12 \times 10^{-2}$  | $\nu_5 + \nu_7$ | 7 5 3   | 7 5 2   |
| 2425.6543 | 1.96 | $0.21 \times 10^{-2}$  | $\nu_5 + \nu_7$ | 3 3 1   | 3 3 0   | 2429.5215 | 0.71 | $0.13 \times 10^{-2}$  | $2\nu_9$        | 2 0 2   | 3 3 1   |
| 2425.6910 | 1.08 | $0.18 \times 10^{-2}$  | $\nu_5 + \nu_7$ | 3 3 0   | 3 3 1   | 2429.5772 | 0.50 | $0.46 \times 10^{-2}$  | $\nu_5 + \nu_7$ | 7 5 2   | 7 5 3   |
| 2425.7554 | 0.09 | $0.10 \times 10^{-2}$  | $\nu_3 + \nu_4$ | 3 1 3   | 4 4 0   | 2429.6259 | 0.09 | $-0.23 \times 10^{-2}$ | $\nu_3 + \nu_4$ | 10 9 2  | 11 6 5  |
| 2425.9041 | 6.24 | $-0.42 \times 10^{-2}$ | $2\nu_9$        | 7 4 4   | 7 7 1   | 2429.7298 | 1.38 | $-0.25 \times 10^{-2}$ | $\nu_3 + \nu_4$ | 5 2 4   | 6 1 5   |
| 2425.9041 | 6.24 | $0.92 \times 10^{-3}$  | $2\nu_9$        | 4 0 4   | 5 1 5   | 2429.7298 | 1.38 | $-0.60 \times 10^{-4}$ | $\nu_5 + \nu_7$ | 10 6 5  | 10 6 4  |
| 2425.9523 | 4.23 | $0.71 \times 10^{-3}$  | $2\nu_9$        | 4 1 4   | 5 0 5   | 2429.7747 | 0.37 | $-0.33 \times 10^{-2}$ | $2\nu_9$        | 10 1 10 | 10 2 9  |
| 2425.9868 | 0.13 | $-0.14 \times 10^{-2}$ | $2\nu_9$        | 7 2 5   | 8 1 8   | 2429.8930 | 0.50 | $0.32 \times 10^{-2}$  | $\nu_5 + \nu_7$ | 9 2 7   | 9 2 8   |
| 2426.0137 | 0.13 | $0.27 \times 10^{-2}$  | $\nu_3 + \nu_4$ | 6 5 1   | 7 4 4   | 2429.9087 | 0.26 | $-0.52 \times 10^{-2}$ | $\nu_5 + \nu_7$ | 10 6 4  | 10 6 5  |
| 2426.0137 | 0.13 | $-0.12 \times 10^{-2}$ | $\nu_5 + \nu_7$ | 14 5 10 | 14 3 11 | 2429.9615 | 0.34 | $-0.50 \times 10^{-4}$ | $2\nu_9$        | 15 3 12 | 15 4 11 |
| 2426.0137 | 0.13 | $-0.12 \times 10^{-2}$ | $2\nu_9$        | 14 2 12 | 14 3 11 | 2430.0506 | 0.58 | $-0.38 \times 10^{-2}$ | $2\nu_9$        | 6 3 4   | 7 0 7   |
| 2426.0520 | 0.89 | $-0.32 \times 10^{-2}$ | $\nu_5 + \nu_7$ | 14 7 8  | 14 7 7  | 2430.2182 | 0.10 | $-0.63 \times 10^{-3}$ | $2\nu_9$        | 4 4 0   | 5 3 3   |
| 2426.1114 | 0.17 | $-0.12 \times 10^{-2}$ | $\nu_3 + \nu_4$ | 6 6 1   | 7 5 2   | 2430.4520 | 0.77 | $-0.37 \times 10^{-2}$ | $\nu_5 + \nu_7$ | 6 2 5   | 6 0 6   |
| 2426.1699 | 0.20 | $0.82 \times 10^{-3}$  | $\nu_3 + \nu_4$ | 6 6 0   | 7 5 3   | 2430.5598 | 0.47 | $0.50 \times 10^{-2}$  | $\nu_5 + \nu_7$ | 7 1 6   | 7 1 7   |
| 2426.2054 | 1.71 | $0.40 \times 10^{-2}$  | $\nu_3 + \nu_4$ | 6 1 6   | 7 0 7   | 2430.5924 | 0.14 | $-0.35 \times 10^{-2}$ | $\nu_5 + \nu_7$ | 15 4 11 | 15 4 12 |
| 2426.2328 | 0.30 | $0.41 \times 10^{-2}$  | $\nu_5 + \nu_7$ | 9 5 5   | 9 5 4   | 2430.6709 | 2.07 | $0.20 \times 10^{-2}$  | $\nu_5 + \nu_7$ | 6 5 2   | 6 5 1   |
| 2426.3186 | 0.61 | $0.16 \times 10^{-2}$  | $\nu_5 + \nu_7$ | 7 2 5   | 7 2 6   | 2430.8397 | 0.33 | $-0.58 \times 10^{-2}$ | $\nu_5 + \nu_9$ | 15 1 14 | 16 2 14 |
| 2426.4357 | 3.34 | $0.22 \times 10^{-2}$  | $\nu_3 + \nu_4$ | 4 3 2   | 5 4 1   | 2430.9550 | 0.49 | $-0.28 \times 10^{-2}$ | $\nu_5 + \nu_7$ | 6 3 4   | 6 1 5   |
| 2426.4635 | 2.10 | $0.52 \times 10^{-3}$  | $2\nu_9$        | 4 2 3   | 5 1 4   | 2431.1212 | 0.23 | $-0.10 \times 10^{-2}$ | $2\nu_9$        | 7 2 6   | 7 5 3   |
| 2426.5076 | 1.47 | $0.22 \times 10^{-2}$  | $2\nu_9$        | 3 2 2   | 4 3 1   | 2431.1651 | 0.74 | $-0.30 \times 10^{-2}$ | $\nu_5 + \nu_7$ | 7 3 5   | 7 1 6   |
| 2426.5244 | 1.60 | $-0.44 \times 10^{-2}$ | $\nu_5 + \nu_7$ | 10 3 7  | 10 3 8  | 2431.1891 | 0.54 | $-0.12 \times 10^{-2}$ | $\nu_5 + \nu_7$ | 5 3 3   | 5 1 4   |
| 2426.5244 | 1.60 | $-0.35 \times 10^{-2}$ | $2\nu_9$        | 6 5 2   | 7 2 5   | 2431.3100 | 2.21 | $-0.56 \times 10^{-2}$ | $\nu_5 + \nu_7$ | 12 7 6  | 12 7 5  |
| 2426.6246 | 0.15 | $-0.60 \times 10^{-2}$ | $\nu_3 + \nu_4$ | 11 6 5  | 11 9 2  | 2431.3100 | 2.21 | $-0.64 \times 10^{-3}$ | $2\nu_9$        | 3 1 2   | 4 2 3   |
| 2426.6469 | 0.92 | $0.46 \times 10^{-2}$  | $2\nu_9$        | 9 3 7   | 9 6 4   | 2431.3995 | 0.37 | $0.48 \times 10^{-2}$  | $2\nu_9$        | 6 3 4   | 6 6 1   |
| 2426.6894 | 0.80 | $-0.55 \times 10^{-3}$ | $\nu_5 + \nu_7$ | 6 4 2   | 6 4 3   | 2431.4562 | 0.15 | $0.11 \times 10^{-2}$  | $\nu_3 + \nu_4$ | 9 5 4   | 9 8 1   |
| 2426.8276 | 1.65 | $0.80 \times 10^{-3}$  | $\nu_3 + \nu_4$ | 5 2 3   | 6 3 4   | 2431.4770 | 0.45 | $0.14 \times 10^{-2}$  | $\nu_5 + \nu_7$ | 9 6 4   | 9 6 3   |
| 2426.8971 | 0.38 | $0.43 \times 10^{-2}$  | $\nu_3 + \nu_4$ | 8 3 5   | 9 2 8   | 2431.5346 | 0.13 | $0.49 \times 10^{-2}$  | $\nu_5 + \nu_7$ | 9 6 3   | 9 6 4   |
| 2426.8971 | 0.38 | $-0.31 \times 10^{-2}$ | $\nu_5 + \nu_7$ | 9 5 4   | 9 5 5   | 2431.6024 | 3.12 | $0.51 \times 10^{-2}$  | $\nu_5 + \nu_7$ | 5 5 0   | 5 5 1   |
| 2426.9978 | 0.43 | $0.32 \times 10^{-2}$  | $\nu_5 + \nu_7$ | 5 1 4   | 5 1 5   | 2431.6024 | 3.12 | $0.59 \times 10^{-2}$  | $\nu_5 + \nu_7$ | 5 5 1   | 5 5 0   |
| 2427.1458 | 0.27 | $0.36 \times 10^{-2}$  | $\nu_5 + \nu_7$ | 14 7 7  | 14 7 8  | 2431.6932 | 0.69 | $0.41 \times 10^{-2}$  | $\nu_5 + \nu_7$ | 15 13 3 | 15 13 2 |
| 2427.2205 | 0.09 | $0.40 \times 10^{-2}$  | $2\nu_9$        | 6 4 3   | 7 1 6   | 2431.6932 | 0.69 | $0.13 \times 10^{-3}$  | $\nu_5 + \nu_7$ | 7 2 6   | 7 0 7   |
| 2427.2736 | 0.21 | $0.40 \times 10^{-2}$  | $2\nu_9$        | 8 2 7   | 8 5 4   | 2431.7400 | 0.18 | $0.36 \times 10^{-2}$  | $2\nu_9$        | 5 4 2   | 6 1 5   |
| 2427.3194 | 1.79 | $0.24 \times 10^{-2}$  | $\nu_3 + \nu_4$ | 4 3 1   | 5 4 2   | 2431.7583 | 0.56 | $-0.30 \times 10^{-2}$ | $\nu_5 + \nu_7$ | 8 3 6   | 8 1 7   |
| 2427.5539 | 1.07 | $0.13 \times 10^{-2}$  | $\nu_5 + \nu_7$ | 5 4 2   | 5 4 1   | 2431.7738 | 0.31 | $-0.70 \times 10^{-4}$ | $2\nu_9$        | 4 3 1   | 5 2 4   |
| 2427.6055 | 0.90 | $0.76 \times 10^{-3}$  | $\nu_5 + \nu_7$ | 5 4 1   | 5 4 2   | 2431.8089 | 0.18 | $-0.51 \times 10^{-2}$ | $\nu_3 + \nu_4$ | 5 5 1   | 6 4 2   |
| 2427.6055 | 0.90 | $-0.41 \times 10^{-3}$ | $\nu_5 + \nu_7$ | 11 6 6  | 11 6 5  | 2431.8344 | 0.23 | $0.57 \times 10^{-3}$  | $\nu_5 + \nu_7$ | 4 3 2   | 4 1 3   |
| 2427.6227 | 0.39 | $-0.50 \times 10^{-2}$ | $2\nu_9$        | 12 2 11 | 12 3 10 | 2431.8801 | 0.34 | $-0.56 \times 10^{-2}$ | $\nu_3 + \nu_4$ | 5 0 5   | 6 1 6   |
| 2427.6522 | 1.30 | $0.64 \times 10^{-2}$  | $2\nu_9$        | 12 1 11 | 12 2 10 | 2431.8941 | 1.82 | $-0.67 \times 10^{-2}$ | $\nu_3 + \nu_4$ | 5 1 5   | 6 0 6   |
| 2427.9340 | 0.16 | $0.71 \times 10^{-3}$  | $\nu_5 + \nu_7$ | 2 2 1   | 2 0 2   | 2431.9037 | 1.13 | $0.29 \times 10^{-2}$  | $\nu_3 + \nu_4$ | 5 1 5   | 6 0 6   |
| 2427.9787 | 0.58 | $0.21 \times 10^{-2}$  | $\nu_5 + \nu_7$ | 8 2 6   | 8 2 7   | 2431.9840 | 0.30 | $0.33 \times 10^{-2}$  | $2\nu_9$        | 6 1 6   | 6 4 3   |
| 2428.0065 | 1.06 | $-0.45 \times 10^{-2}$ | $2\nu_9$        | 4 3 2   | 5 2 3   | 2432.0475 | 0.14 | $-0.26 \times 10^{-3}$ | $\nu_3 + \nu_4$ | 5 5 0   | 6 4 3   |
| 2428.0718 | 1.65 | $-0.87 \times 10^{-3}$ | $2\nu_9$        | 3 2 1   | 4 3 2   | 2432.0475 | 0.14 | $-0.44 \times 10^{-2}$ | $\nu_3 + \nu_4$ | 7 6 2   | 8 3 5   |
| 2428.1012 | 0.36 | $-0.64 \times 10^{-3}$ | $\nu_5 + \nu_7$ | 3 2 2   | 3 0 3   | 2432.2085 | 1.50 | $0.91 \times 10^{-3}$  | $\nu_3 + \nu_4$ | 4 2 2   | 5 3 3   |
| 2428.1478 | 0.20 | $0.21 \times 10^{-2}$  | $\nu_3 + \nu_4$ | 10 5 6  | 10 8 3  | 2432.3048 | 0.20 | $-0.16 \times 10^{-2}$ | $\nu_3 + \nu_4$ | 8 3 6   | 9 0 9   |
| 2428.1478 | 0.20 | $-0.13 \times 10^{-2}$ | $\nu_5 + \nu_7$ | 11 6 5  | 11 6 6  | 2432.3799 | 0.95 | $0.20 \times 10^{-2}$  | $\nu_5 + \nu_7$ | 8 1 7   | 8 1 8   |
| 2428.2200 | 0.12 | $-0.49 \times 10^{-2}$ | $\nu_3 + \nu_4$ | 6 4 2   | 7 3 5   | 2432.4492 | 0.23 | $-0.48 \times 10^{-2}$ | $\nu_5 + \nu_7$ | 15 12 4 | 15 12 3 |
| 2428.3207 | 0.31 | $-0.23 \times 10^{-2}$ | $\nu_5 + \nu_7$ | 15 11 4 | 15 11 5 | 2432.4492 | 0.23 | $0.22 \times 10^{-2}$  | $2\nu_9$        | 11 2 10 | 11 3 9  |
| 2428.3450 | 0.35 | $-0.59 \times 10^{-2}$ | $\nu_5 + \nu_7$ | 11 3 8  | 11 3 9  | 2432.5885 | 0.22 | $-0.12 \times 10^{-2}$ | $\nu_5 + \nu_7$ | 14 8 6  | 14 8 7  |
| 2428.3669 | 1.78 | $0.90 \times 10^{-3}$  | $\nu_5 + \nu_7$ | 4 4 0   | 4 4 1   | 2432.6567 | 0.79 | $-0.42 \times 10^{-2}$ | $\nu_5 + \nu_7$ | 9 3 7   | 9 1 8   |
| 2428.4066 | 0.55 | $0.50 \times 10^{-2}$  | $\nu_5 + \nu_7$ | 15 11 5 | 15 11 4 | 2432.7248 | 3.01 | $-0.38 \times 10^{-2}$ | $\nu_3 + \nu_4$ | 3 0 3   | 4 3 2   |
| 2428.4687 | 0.45 | $-0.81 \times 10^{-3}$ | $\nu_5 + \nu_7$ | 1 0 1   | 0 0 0   | 2432.7248 | 3.01 | $-0.14 \times 10^{-3}$ | $\nu_3 + \nu_4$ | 3 3 1   | 4 4 0   |
| 2428.4866 | 0.18 | $-0.42 \times 10^{-2}$ | $\nu_3 + \nu_4$ | 11 10 2 | 12 7 5  | 2432.7248 | 3.01 | $-0.45 \times 10^{-3}$ | $\nu_5 + \nu_7$ | 13 1 12 | 13 3 11 |
| 2428.5122 | 0.53 | $-0.53 \times 10^{-2}$ | $2\nu_9$        | 9 8 2   | 9 9 1   | 2432.7770 | 4.64 | $0.21 \times 10^{-3}$  | $2\nu_9$        | 3 0 3   | 4 1 4   |
| 2428.6008 | 0.41 | $-0.31 \times 10^{-3}$ | $\nu_5 + \nu_7$ | 4 2 3   | 4 0 4   | 2432.8540 | 0.36 | $0.28 \times 10^{-2}$  | $\nu_3 + \nu_4$ | 5 4 1   | 6 3 4   |
| 2428.7554 | 1.33 | $-0.12 \times 10^{-2}$ | $\nu_3 + \nu_4$ | 4 2 3   | 5 3 2   | 2432.8923 | 2.71 | $-0.80 \times 10^{-4}$ | $\nu_3 + \nu_4$ | 3 3 0   | 4 4 1   |
| 2428.8415 | 0.24 | $-0.51 \times 10^{-3}$ | $\nu_3 + \nu_4$ | 3 1 2   | 4 4 1   | 2432.9356 | 2.94 | $0.11 \times 10^{-2}$  | $2\nu_9$        | 3 1 3   | 4 0 4   |
| 2428.9378 | 1.10 | $-0.72 \times 10^{-3}$ | $\nu_5 + \nu_7$ | 13 7 7  | 13 7 6  | 2432.9514 | 0.74 | $0.53 \times 10^{-2}$  | $\nu_5 + \nu_7$ | 8 6 3   | 8 6 2   |
| 2428.9887 | 0.12 | $0.23 \times 10^{-2}$  | $\nu_3 + \nu_4$ | 7 5 3   | 8 2 6   | 2433.0096 | 0.59 | $-0.61 \times 10^{-3}$ | $\nu_5 + \nu_7$ | 9 4 6   | 9 2 7   |
| 2429.2148 | 0.28 | $0.59 \times 10^{-2}$  | $\nu_5 + \nu_7$ | 15 10 6 | 15 10 5 | 2433.0255 | 0.53 | $-0.24 \times 10^{-3}$ | $\nu_5 + \nu_7$ | 10 4 7  | 10 2 8  |
| 2429.4042 | 0.86 | $-0.17 \times 10^{-2}$ | $\nu_5 + \nu_7$ | 5 2 4   | 5 0 5   | 2433.0684 | 0.53 | $0.33 \times 10^{-3}$  | $\nu_5 + \nu_7$ | 8 2 7   | 8 0 8   |
| 2429.4284 | 1.66 | $-0.46 \times 10^{-2}$ | $\nu_3 + \nu_4$ | 5 1 4   | 6 2 5   | 2433.1813 | 0.24 | $-0.34 \times 10^{-3}$ | $\nu_5 + \nu_7$ | 11 7 4  | 11 7 5  |
| 2429.4645 | 0.27 | $-0.33 \times 10^{-2}$ | $\nu_5 + \nu_9$ | 15 0 15 | 16 1 15 | 2433.3187 | 2.44 | $-0.12 \times 10^{-2}$ | $\nu_3 + \nu_4$ | 11 1 11 | 11 4 8  |
| 2429.4645 | 0.27 | $-0.38 \times 10^{-2}$ | $\nu_5 + \nu_9$ | 15 1 15 | 16 2 15 | 2433.3679 | 1.90 | $0.24 \times 10^{-3}$  | $2\nu_9$        | 2 2 1   | 3 3 0   |
| 2429.4736 | 0.21 | $0.53 \times 10^{-2}$  | $\nu_5 + \nu_9$ | 15 1 15 | 16 2 15 | 2433.4419 | 0.85 | $0.38 \times 10^{-3}$  | $2\nu_9$        | 3 2 2   | 4 1 3   |



| (I)       | (II) | (III)                  | (IV)            | (V)     | (VI)    | (I)       | (II) | (III)                  | (IV)            | (V)     | (VI)    |
|-----------|------|------------------------|-----------------|---------|---------|-----------|------|------------------------|-----------------|---------|---------|
| 2433.5052 | 0.58 | $-0.47 \times 10^{-2}$ | $\nu_5 + \nu_7$ | 8 4 5   | 8 2 6   | 2437.5495 | 2.22 | $0.17 \times 10^{-2}$  | $\nu_3 + \nu_4$ | 3 2 1   | 4 3 2   |
| 2433.5881 | 0.22 | $0.49 \times 10^{-2}$  | $\nu_3 + \nu_4$ | 7 4 4   | 7 7 1   | 2437.5495 | 2.22 | $-0.67 \times 10^{-2}$ | $\nu_3 + \nu_4$ | 10 0 10 | 10 3 7  |
| 2433.7435 | 2.08 | $0.12 \times 10^{-2}$  | $2\nu_9$        | 2 2 0   | 3 3 1   | 2437.5608 | 1.74 | $0.46 \times 10^{-2}$  | $\nu_3 + \nu_4$ | 10 0 10 | 10 3 7  |
| 2433.8063 | 0.51 | $0.26 \times 10^{-3}$  | $\nu_5 + \nu_7$ | 10 3 8  | 10 1 9  | 2437.6473 | 0.50 | $0.73 \times 10^{-3}$  | $\nu_5 + \nu_7$ | 11 2 10 | 11 0 11 |
| 2433.9254 | 1.38 | $-0.16 \times 10^{-2}$ | $2\nu_9$        | 6 2 5   | 6 5 2   | 2437.6601 | 0.17 | $-0.14 \times 10^{-2}$ | $\nu_3 + \nu_4$ | 4 4 1   | 5 3 2   |
| 2433.9388 | 0.36 | $0.29 \times 10^{-2}$  | $\nu_5 + \nu_7$ | 11 2 9  | 11 2 10 | 2437.6816 | 0.29 | $-0.28 \times 10^{-2}$ | $\nu_5 + \nu_7$ | 5 4 2   | 5 2 3   |
| 2434.0479 | 4.35 | $-0.34 \times 10^{-2}$ | $\nu_3 + \nu_4$ | 8 4 5   | 8 7 2   | 2437.7019 | 0.40 | $-0.43 \times 10^{-2}$ | $\nu_3 + \nu_4$ | 10 2 9  | 10 5 6  |
| 2434.1530 | 0.42 | $0.53 \times 10^{-2}$  | $\nu_5 + \nu_7$ | 9 1 8   | 9 1 9   | 2437.7019 | 0.40 | $-0.43 \times 10^{-2}$ | $\nu_5 + \nu_7$ | 13 2 11 | 13 2 12 |
| 2434.1995 | 1.04 | $0.60 \times 10^{-4}$  | $\nu_5 + \nu_7$ | 7 6 2   | 7 6 1   | 2437.7423 | 5.69 | $0.48 \times 10^{-2}$  | $\nu_3 + \nu_4$ | 8 8 1   | 9 5 4   |
| 2434.2370 | 0.91 | $0.59 \times 10^{-2}$  | $2\nu_9$        | 8 7 1   | 8 8 0   | 2437.7825 | 2.10 | $0.87 \times 10^{-3}$  | $\nu_3 + \nu_4$ | 4 0 4   | 5 1 5   |
| 2434.2937 | 0.91 | $0.18 \times 10^{-2}$  | $\nu_5 + \nu_7$ | 12 4 9  | 12 2 10 | 2437.7825 | 2.10 | $-0.36 \times 10^{-2}$ | $\nu_3 + \nu_4$ | 4 1 4   | 5 0 5   |
| 2434.2937 | 0.91 | $0.71 \times 10^{-3}$  | $2\nu_9$        | 2 1 2   | 3 2 1   | 2437.7902 | 1.97 | $0.41 \times 10^{-2}$  | $\nu_3 + \nu_4$ | 4 1 4   | 5 0 5   |
| 2434.4524 | 0.13 | $0.13 \times 10^{-2}$  | $\nu_3 + \nu_4$ | 10 5 5  | 10 8 2  | 2437.8801 | 0.58 | $-0.68 \times 10^{-2}$ | $\nu_3 + \nu_4$ | 11 10 2 | 11 11 1 |
| 2434.4694 | 0.34 | $-0.43 \times 10^{-3}$ | $2\nu_9$        | 9 1 9   | 9 2 8   | 2437.8801 | 0.58 | $-0.26 \times 10^{-2}$ | $2\nu_9$        | 4 3 2   | 5 0 5   |
| 2434.4908 | 0.29 | $0.27 \times 10^{-2}$  | $2\nu_9$        | 9 0 9   | 9 1 8   | 2437.8915 | 0.47 | $0.44 \times 10^{-2}$  | $\nu_3 + \nu_4$ | 11 10 1 | 11 11 0 |
| 2434.5409 | 0.66 | $0.20 \times 10^{-2}$  | $\nu_5 + \nu_7$ | 9 2 8   | 9 0 9   | 2437.8915 | 0.47 | $0.46 \times 10^{-2}$  | $\nu_3 + \nu_4$ | 11 10 2 | 11 11 1 |
| 2434.5553 | 1.14 | $0.11 \times 10^{-2}$  | $\nu_5 + \nu_7$ | 7 4 4   | 7 2 5   | 2438.0583 | 0.35 | $0.14 \times 10^{-2}$  | $\nu_5 + \nu_7$ | 8 7 1   | 8 7 2   |
| 2434.5553 | 1.14 | $-0.26 \times 10^{-3}$ | $2\nu_9$        | 8 1 7   | 8 4 4   | 2438.1849 | 0.85 | $0.28 \times 10^{-2}$  | $\nu_5 + \nu_7$ | 9 5 5   | 9 3 6   |
| 2434.7438 | 1.00 | $-0.49 \times 10^{-3}$ | $\nu_5 + \nu_7$ | 2 0 2   | 1 0 1   | 2438.2095 | 0.17 | $0.30 \times 10^{-2}$  | $\nu_3 + \nu_4$ | 11 1 10 | 11 4 7  |
| 2434.8152 | 0.37 | $0.54 \times 10^{-2}$  | $\nu_3 + \nu_4$ | 6 5 2   | 7 2 5   | 2438.3611 | 0.38 | $0.36 \times 10^{-2}$  | $\nu_3 + \nu_4$ | 12 10 2 | 12 11 1 |
| 2434.8828 | 0.13 | $0.35 \times 10^{-2}$  | $\nu_5 + \nu_7$ | 13 8 5  | 13 8 6  | 2438.3611 | 0.38 | $0.53 \times 10^{-2}$  | $\nu_3 + \nu_4$ | 12 10 3 | 12 11 2 |
| 2434.9537 | 1.05 | $0.20 \times 10^{-2}$  | $\nu_5 + \nu_7$ | 14 1 13 | 14 3 12 | 2438.4213 | 0.80 | $0.46 \times 10^{-2}$  | $2\nu_9$        | 8 3 5   | 8 6 2   |
| 2435.0241 | 0.48 | $0.51 \times 10^{-2}$  | $\nu_3 + \nu_4$ | 6 4 3   | 7 1 6   | 2438.4528 | 0.28 | $-0.52 \times 10^{-2}$ | $\nu_5 + \nu_9$ | 14 12 2 | 15 13 2 |
| 2435.0241 | 0.48 | $-0.12 \times 10^{-2}$ | $\nu_5 + \nu_7$ | 11 5 7  | 11 3 8  | 2438.4528 | 0.28 | $-0.52 \times 10^{-2}$ | $\nu_5 + \nu_9$ | 14 12 3 | 15 13 3 |
| 2435.0241 | 0.48 | $0.12 \times 10^{-2}$  | $2\nu_9$        | 3 3 1   | 4 2 2   | 2438.7015 | 0.08 | $-0.66 \times 10^{-2}$ | $2\nu_9$        | 13 4 10 | 13 5 9  |
| 2435.0397 | 0.52 | $0.59 \times 10^{-2}$  | $\nu_5 + \nu_7$ | 14 13 1 | 14 13 2 | 2438.7418 | 0.06 | $0.30 \times 10^{-2}$  | $\nu_3 + \nu_4$ | 6 2 4   | 7 1 7   |
| 2435.0397 | 0.52 | $-0.68 \times 10^{-3}$ | $\nu_5 + \nu_7$ | 2 1 2   | 1 1 1   | 2438.7980 | 0.38 | $0.96 \times 10^{-3}$  | $2\nu_9$        | 8 1 8   | 8 2 7   |
| 2435.0948 | 0.17 | $-0.32 \times 10^{-2}$ | $\nu_3 + \nu_4$ | 12 11 2 | 12 12 1 | 2438.9653 | 0.37 | $0.19 \times 10^{-2}$  | $\nu_5 + \nu_9$ | 14 2 13 | 15 3 13 |
| 2435.0948 | 0.17 | $-0.32 \times 10^{-2}$ | $\nu_3 + \nu_4$ | 12 11 1 | 12 12 0 | 2438.9653 | 0.37 | $0.46 \times 10^{-2}$  | $\nu_5 + \nu_9$ | 14 1 13 | 15 2 13 |
| 2435.1239 | 0.67 | $-0.21 \times 10^{-2}$ | $\nu_5 + \nu_7$ | 11 3 9  | 11 1 10 | 2438.9941 | 0.41 | $0.24 \times 10^{-2}$  | $\nu_3 + \nu_4$ | 13 10 4 | 13 11 3 |
| 2435.1518 | 0.24 | $-0.36 \times 10^{-2}$ | $\nu_5 + \nu_7$ | 15 6 10 | 15 4 11 | 2439.1191 | 0.77 | $0.59 \times 10^{-3}$  | $\nu_5 + \nu_7$ | 7 7 0   | 7 7 1   |
| 2435.1871 | 0.20 | $0.43 \times 10^{-2}$  | $\nu_5 + \nu_7$ | 10 7 3  | 10 7 4  | 2439.1356 | 0.21 | $-0.15 \times 10^{-2}$ | $\nu_3 + \nu_4$ | 8 4 4   | 8 7 1   |
| 2435.2636 | 0.89 | $-0.56 \times 10^{-2}$ | $\nu_5 + \nu_7$ | 6 6 0   | 6 6 1   | 2439.1869 | 0.43 | $-0.11 \times 10^{-3}$ | $\nu_5 + \nu_7$ | 12 3 9  | 12 1 12 |
| 2435.3798 | 0.50 | $0.25 \times 10^{-2}$  | $\nu_5 + \nu_7$ | 13 4 10 | 13 2 11 | 2439.2082 | 0.22 | $-0.30 \times 10^{-2}$ | $\nu_5 + \nu_7$ | 6 3 3   | 6 1 6   |
| 2435.4495 | 0.19 | $-0.41 \times 10^{-2}$ | $\nu_3 + \nu_4$ | 7 2 5   | 8 1 8   | 2439.2424 | 2.02 | $-0.19 \times 10^{-2}$ | $\nu_5 + \nu_7$ | 12 2 11 | 12 0 12 |
| 2435.4495 | 0.19 | $0.41 \times 10^{-2}$  | $2\nu_9$        | 6 3 3   | 6 6 0   | 2439.2424 | 2.02 | $-0.13 \times 10^{-2}$ | $\nu_5 + \nu_7$ | 4 4 1   | 4 2 2   |
| 2435.4495 | 0.19 | $-0.56 \times 10^{-2}$ | $2\nu_9$        | 12 3 10 | 12 4 9  | 2439.2424 | 2.02 | $-0.37 \times 10^{-2}$ | $2\nu_9$        | 7 1 6   | 7 4 3   |
| 2435.4649 | 0.21 | $-0.54 \times 10^{-2}$ | $\nu_3 + \nu_4$ | 7 3 5   | 8 0 8   | 2439.2424 | 2.02 | $-0.36 \times 10^{-3}$ | $2\nu_9$        | 2 0 2   | 3 1 3   |
| 2435.4649 | 0.21 | $0.45 \times 10^{-2}$  | $\nu_3 + \nu_4$ | 13 11 2 | 13 12 1 | 2439.4624 | 0.30 | $0.53 \times 10^{-2}$  | $\nu_3 + \nu_4$ | 6 6 1   | 7 3 4   |
| 2435.4649 | 0.21 | $0.49 \times 10^{-2}$  | $\nu_3 + \nu_4$ | 13 11 3 | 13 12 2 | 2439.4624 | 0.30 | $-0.37 \times 10^{-2}$ | $\nu_5 + \nu_7$ | 14 2 12 | 14 2 13 |
| 2435.4911 | 1.41 | $-0.23 \times 10^{-2}$ | $\nu_3 + \nu_4$ | 4 1 3   | 5 2 4   | 2439.4978 | 0.45 | $-0.37 \times 10^{-2}$ | $\nu_3 + \nu_4$ | 8 3 6   | 8 6 3   |
| 2435.5724 | 0.89 | $0.40 \times 10^{-3}$  | $\nu_5 + \nu_7$ | 2 1 1   | 1 1 0   | 2439.5498 | 0.32 | $-0.54 \times 10^{-2}$ | $\nu_5 + \nu_7$ | 13 9 4  | 13 9 5  |
| 2435.6460 | 0.56 | $0.13 \times 10^{-2}$  | $\nu_3 + \nu_4$ | 11 3 9  | 11 6 6  | 2439.6506 | 1.82 | $0.27 \times 10^{-2}$  | $\nu_5 + \nu_9$ | 14 11 3 | 15 12 3 |
| 2435.7620 | 0.12 | $0.10 \times 10^{-3}$  | $2\nu_9$        | 5 2 4   | 5 5 1   | 2439.6506 | 1.82 | $0.27 \times 10^{-2}$  | $\nu_5 + \nu_9$ | 14 11 4 | 15 12 4 |
| 2435.8662 | 1.16 | $0.47 \times 10^{-2}$  | $\nu_5 + \nu_7$ | 10 1 9  | 10 1 10 | 2439.6506 | 1.82 | $-0.65 \times 10^{-2}$ | $2\nu_9$        | 11 3 9  | 11 4 8  |
| 2435.8662 | 1.16 | $-0.26 \times 10^{-2}$ | $\nu_5 + \nu_7$ | 12 2 10 | 12 2 11 | 2439.7019 | 2.08 | $0.27 \times 10^{-3}$  | $2\nu_9$        | 2 1 2   | 3 0 3   |
| 2436.0034 | 0.20 | $0.20 \times 10^{-2}$  | $2\nu_9$        | 9 7 3   | 9 8 2   | 2439.7489 | 0.13 | $-0.64 \times 10^{-3}$ | $2\nu_9$        | 7 6 2   | 7 7 1   |
| 2436.0300 | 0.28 | $-0.60 \times 10^{-4}$ | $\nu_5 + \nu_7$ | 6 4 3   | 6 2 4   | 2440.0368 | 0.14 | $0.40 \times 10^{-3}$  | $\nu_3 + \nu_4$ | 7 3 5   | 7 6 2   |
| 2436.0481 | 1.38 | $0.13 \times 10^{-2}$  | $\nu_3 + \nu_4$ | 3 2 2   | 4 3 1   | 2440.0980 | 0.14 | $-0.30 \times 10^{-2}$ | $\nu_3 + \nu_4$ | 9 2 8   | 9 5 5   |
| 2436.0481 | 1.38 | $-0.58 \times 10^{-2}$ | $2\nu_9$        | 9 7 2   | 9 8 1   | 2440.1316 | 0.71 | $-0.66 \times 10^{-2}$ | $\nu_3 + \nu_4$ | 2 0 2   | 3 3 1   |
| 2436.0741 | 0.42 | $0.12 \times 10^{-2}$  | $\nu_5 + \nu_7$ | 10 2 9  | 10 0 10 | 2440.2486 | 0.24 | $-0.29 \times 10^{-2}$ | $2\nu_9$        | 11 2 9  | 11 3 8  |
| 2436.2154 | 0.25 | $-0.43 \times 10^{-2}$ | $\nu_5 + \nu_7$ | 4 3 1   | 4 1 4   | 2440.2774 | 0.08 | $-0.53 \times 10^{-3}$ | $\nu_5 + \nu_7$ | 13 11 2 | 13 11 3 |
| 2436.2436 | 1.53 | $-0.22 \times 10^{-2}$ | $\nu_3 + \nu_4$ | 4 2 3   | 5 1 4   | 2440.3701 | 0.09 | $-0.51 \times 10^{-2}$ | $2\nu_9$        | 10 6 4  | 9 7 3   |
| 2436.4960 | 0.15 | $-0.27 \times 10^{-2}$ | $\nu_3 + \nu_4$ | 5 3 2   | 6 2 5   | 2440.4206 | 0.44 | $0.35 \times 10^{-3}$  | $2\nu_9$        | 2 2 1   | 3 1 2   |
| 2436.5680 | 0.80 | $0.27 \times 10^{-2}$  | $\nu_3 + \nu_4$ | 4 3 2   | 5 2 3   | 2440.4367 | 0.33 | $-0.42 \times 10^{-2}$ | $\nu_5 + \nu_9$ | 14 2 12 | 15 3 12 |
| 2436.6391 | 0.35 | $0.97 \times 10^{-3}$  | $\nu_3 + \nu_4$ | 3 1 3   | 4 2 2   | 2440.4582 | 0.28 | $0.57 \times 10^{-2}$  | $\nu_5 + \nu_7$ | 13 12 2 | 13 12 1 |
| 2436.6391 | 0.35 | $0.38 \times 10^{-2}$  | $\nu_3 + \nu_4$ | 7 4 3   | 7 7 0   | 2440.4765 | 0.24 | $-0.68 \times 10^{-2}$ | $\nu_3 + \nu_4$ | 4 3 1   | 5 2 4   |
| 2436.6858 | 0.40 | $-0.48 \times 10^{-2}$ | $\nu_5 + \nu_7$ | 9 7 3   | 9 7 2   | 2440.4765 | 0.24 | $0.18 \times 10^{-2}$  | $\nu_5 + \nu_7$ | 8 5 4   | 8 3 5   |
| 2436.8696 | 0.11 | $-0.40 \times 10^{-4}$ | $\nu_5 + \nu_9$ | 14 14 1 | 15 15 1 | 2440.6178 | 0.27 | $0.13 \times 10^{-2}$  | $\nu_5 + \nu_7$ | 10 8 3  | 10 8 2  |
| 2436.8696 | 0.11 | $-0.40 \times 10^{-4}$ | $\nu_5 + \nu_9$ | 14 14 0 | 15 15 0 | 2440.6178 | 0.27 | $0.39 \times 10^{-2}$  | $\nu_5 + \nu_7$ | 10 8 2  | 10 8 3  |
| 2436.9190 | 0.89 | $0.42 \times 10^{-2}$  | $2\nu_9$        | 10 2 9  | 10 3 8  | 2440.6707 | 0.21 | $-0.98 \times 10^{-3}$ | $\nu_3 + \nu_4$ | 10 9 2  | 10 10 1 |
| 2436.9887 | 1.08 | $-0.16 \times 10^{-2}$ | $2\nu_9$        | 2 1 1   | 3 2 2   | 2440.6707 | 0.21 | $-0.14 \times 10^{-2}$ | $\nu_3 + \nu_4$ | 10 9 1  | 10 10 0 |
| 2437.0243 | 0.27 | $0.18 \times 10^{-2}$  | $\nu_5 + \nu_7$ | 14 9 5  | 14 9 6  | 2440.8488 | 1.08 | $0.23 \times 10^{-2}$  | $\nu_5 + \nu_7$ | 13 2 12 | 13 0 13 |
| 2437.0382 | 0.36 | $-0.52 \times 10^{-2}$ | $\nu_3 + \nu_4$ | 11 5 6  | 11 8 3  | 2440.9013 | 0.93 | $-0.23 \times 10^{-3}$ | $\nu_5 + \nu_7$ | 3 0 3   | 2 0 2   |
| 2437.0382 | 0.36 | $-0.26 \times 10^{-2}$ | $2\nu_9$        | 10 3 7  | 10 2 8  | 2440.9013 | 0.93 | $0.62 \times 10^{-2}$  | $\nu_5 + \nu_9$ | 14 10 4 | 15 11 4 |
| 2437.3225 | 0.29 | $0.50 \times 10^{-2}$  | $\nu_3 + \nu_4$ | 10 3 8  | 10 6 5  | 2440.9183 | 0.25 | $-0.45 \times 10^{-3}$ | $\nu_5 + \nu_7$ | 6 4 2   | 6 2 5   |
| 2437.4501 | 0.19 | $-0.10 \times 10^{-2}$ | $\nu_5 + \nu_7$ | 5 3 2   | 5 1 5   | 2440.9499 | 0.11 | $-0.36 \times 10^{-3}$ | $\nu_5 + \nu_7$ | 2 2 0   | 1 0 1   |

| (I)       | (II) | (III)                  | (IV)            | (V)     | (VI)    | (I)       | (II) | (III)                  | (IV)            | (V)     | (VI)    |
|-----------|------|------------------------|-----------------|---------|---------|-----------|------|------------------------|-----------------|---------|---------|
| 2440.9840 | 0.28 | $0.64 \times 10^{-3}$  | $2\nu_9$        | 9 2 8   | 9 3 7   | 2445.1087 | 0.37 | $0.36 \times 10^{-3}$  | $\nu_5 + \nu_9$ | 14 7 8  | 15 8 8  |
| 2441.1555 | 0.25 | $-0.29 \times 10^{-2}$ | $2\nu_9$        | 8 6 3   | 8 7 2   | 2445.1387 | 0.19 | $0.35 \times 10^{-3}$  | $\nu_3 + \nu_4$ | 6 2 5   | 6 5 2   |
| 2441.1827 | 1.06 | $-0.14 \times 10^{-2}$ | $\nu_5 + \nu_7$ | 3 1 3   | 2 1 2   | 2445.1387 | 0.19 | $-0.23 \times 10^{-3}$ | $\nu_5 + \nu_7$ | 10 6 5  | 10 4 6  |
| 2441.2082 | 0.42 | $-0.69 \times 10^{-2}$ | $\nu_3 + \nu_4$ | 9 4 5   | 9 7 2   | 2445.2348 | 0.34 | $-0.20 \times 10^{-2}$ | $2\nu_9$        | 8 1 7   | 8 2 6   |
| 2441.2797 | 0.52 | $-0.20 \times 10^{-2}$ | $2\nu_9$        | 9 1 8   | 9 2 7   | 2445.3307 | 0.83 | $0.61 \times 10^{-2}$  | $\nu_5 + \nu_9$ | 14 6 9  | 15 7 9  |
| 2441.3603 | 1.96 | $-0.67 \times 10^{-3}$ | $\nu_3 + \nu_4$ | 3 1 2   | 4 2 3   | 2445.3607 | 1.37 | $-0.78 \times 10^{-3}$ | $2\nu_9$        | 1 0 1   | 2 1 2   |
| 2441.4391 | 0.28 | $-0.28 \times 10^{-2}$ | $\nu_5 + \nu_7$ | 13 10 4 | 13 10 3 | 2445.4070 | 0.31 | $-0.43 \times 10^{-2}$ | $\nu_3 + \nu_4$ | 3 3 0   | 4 2 3   |
| 2441.4391 | 0.28 | $0.42 \times 10^{-3}$  | $\nu_5 + \nu_7$ | 13 10 3 | 13 10 4 | 2445.4070 | 0.31 | $0.52 \times 10^{-2}$  | $\nu_3 + \nu_4$ | 11 3 8  | 11 6 5  |
| 2441.4391 | 0.28 | $0.80 \times 10^{-4}$  | $\nu_5 + \nu_7$ | 7 4 3   | 7 2 6   | 2445.4668 | 0.33 | $0.39 \times 10^{-2}$  | $\nu_5 + \nu_7$ | 9 5 4   | 9 3 7   |
| 2441.4476 | 0.33 | $0.57 \times 10^{-2}$  | $\nu_5 + \nu_7$ | 13 10 4 | 13 10 3 | 2445.6407 | 0.58 | $-0.36 \times 10^{-2}$ | $\nu_3 + \nu_4$ | 7 3 4   | 7 6 1   |
| 2441.7160 | 0.08 | $-0.39 \times 10^{-2}$ | $\nu_5 + \nu_7$ | 12 9 4  | 12 9 3  | 2445.7575 | 0.31 | $0.21 \times 10^{-2}$  | $\nu_5 + \nu_7$ | 10 5 5  | 10 3 8  |
| 2441.7160 | 0.08 | $-0.47 \times 10^{-2}$ | $\nu_5 + \nu_7$ | 12 9 3  | 12 9 4  | 2445.7771 | 0.43 | $-0.43 \times 10^{-2}$ | $\nu_5 + \nu_9$ | 13 0 13 | 14 1 13 |
| 2441.7160 | 0.08 | $-0.16 \times 10^{-2}$ | $2\nu_9$        | 6 2 4   | 6 5 1   | 2445.7771 | 0.43 | $-0.45 \times 10^{-2}$ | $\nu_5 + \nu_9$ | 13 1 13 | 14 2 13 |
| 2441.7885 | 1.14 | $0.29 \times 10^{-3}$  | $\nu_5 + \nu_7$ | 3 1 2   | 2 1 1   | 2445.8154 | 0.65 | $0.47 \times 10^{-2}$  | $\nu_5 + \nu_7$ | 10 9 1  | 10 9 2  |
| 2441.9288 | 0.23 | $0.40 \times 10^{-2}$  | $\nu_3 + \nu_4$ | 5 2 3   | 6 1 6   | 2445.8154 | 0.65 | $0.47 \times 10^{-2}$  | $\nu_5 + \nu_7$ | 10 9 2  | 10 9 1  |
| 2442.0042 | 0.70 | $0.30 \times 10^{-4}$  | $2\nu_9$        | 1 1 1   | 2 2 0   | 2445.8350 | 0.16 | $0.76 \times 10^{-3}$  | $2\nu_9$        | 4 0 4   | 4 3 1   |
| 2442.0205 | 1.40 | $0.26 \times 10^{-3}$  | $\nu_3 + \nu_4$ | 12 9 3  | 12 10 2 | 2445.9082 | 0.12 | $-0.17 \times 10^{-3}$ | $\nu_5 + \nu_9$ | 10 1 10 | 11 4 8  |
| 2442.0948 | 0.23 | $0.94 \times 10^{-3}$  | $\nu_5 + \nu_7$ | 11 6 6  | 11 4 7  | 2445.9540 | 0.17 | $-0.33 \times 10^{-3}$ | $\nu_5 + \nu_7$ | 5 0 5   | 4 2 2   |
| 2442.1923 | 0.25 | $-0.31 \times 10^{-2}$ | $\nu_5 + \nu_7$ | 9 8 1   | 9 8 2   | 2446.0004 | 0.26 | $0.14 \times 10^{-2}$  | $\nu_3 + \nu_4$ | 12 8 5  | 12 9 4  |
| 2442.1923 | 0.25 | $-0.35 \times 10^{-2}$ | $\nu_5 + \nu_7$ | 9 8 2   | 9 8 1   | 2446.0403 | 0.12 | $-0.39 \times 10^{-2}$ | $\nu_3 + \nu_4$ | 5 2 4   | 5 5 1   |
| 2442.2071 | 0.22 | $-0.69 \times 10^{-2}$ | $\nu_5 + \nu_9$ | 14 4 11 | 15 5 11 | 2446.0856 | 0.40 | $0.36 \times 10^{-2}$  | $\nu_5 + \nu_7$ | 7 5 2   | 7 3 5   |
| 2442.2370 | 0.23 | $0.53 \times 10^{-2}$  | $\nu_3 + \nu_4$ | 8 1 8   | 8 4 5   | 2446.1526 | 0.20 | $-0.41 \times 10^{-2}$ | $\nu_3 + \nu_4$ | 9 1 8   | 9 4 5   |
| 2442.2828 | 0.20 | $-0.28 \times 10^{-2}$ | $\nu_5 + \nu_9$ | 14 9 6  | 15 10 6 | 2446.1526 | 0.20 | $0.53 \times 10^{-2}$  | $\nu_5 + \nu_7$ | 11 10 1 | 11 10 2 |
| 2442.3029 | 0.25 | $-0.43 \times 10^{-2}$ | $\nu_5 + \nu_9$ | 14 9 5  | 15 10 5 | 2446.1526 | 0.20 | $0.57 \times 10^{-2}$  | $\nu_5 + \nu_7$ | 11 10 2 | 11 10 1 |
| 2442.3379 | 0.49 | $-0.37 \times 10^{-2}$ | $2\nu_9$        | 5 0 5   | 5 3 2   | 2446.1617 | 0.19 | $0.50 \times 10^{-2}$  | $\nu_3 + \nu_4$ | 9 1 8   | 9 4 5   |
| 2442.4446 | 0.75 | $0.17 \times 10^{-2}$  | $\nu_5 + \nu_7$ | 8 4 4   | 8 2 7   | 2446.2088 | 0.71 | $-0.19 \times 10^{-2}$ | $2\nu_9$        | 10 4 6  | 10 7 3  |
| 2442.4623 | 0.45 | $0.12 \times 10^{-2}$  | $\nu_5 + \nu_7$ | 14 3 11 | 14 1 14 | 2446.2088 | 0.71 | $-0.66 \times 10^{-3}$ | $2\nu_9$        | 6 1 6   | 6 2 5   |
| 2442.4740 | 0.95 | $0.19 \times 10^{-2}$  | $\nu_5 + \nu_7$ | 14 2 13 | 14 0 14 | 2446.2210 | 0.49 | $0.26 \times 10^{-2}$  | $\nu_5 + \nu_7$ | 13 7 7  | 13 5 8  |
| 2442.4973 | 0.37 | $-0.56 \times 10^{-3}$ | $\nu_3 + \nu_4$ | 10 4 6  | 10 7 3  | 2446.2210 | 0.49 | $-0.28 \times 10^{-2}$ | $\nu_5 + \nu_9$ | 13 11 3 | 14 12 3 |
| 2442.4973 | 0.37 | $0.32 \times 10^{-3}$  | $2\nu_9$        | 12 4 9  | 12 5 8  | 2446.2210 | 0.49 | $-0.28 \times 10^{-2}$ | $\nu_5 + \nu_9$ | 13 11 2 | 14 12 2 |
| 2442.5184 | 0.16 | $0.21 \times 10^{-2}$  | $2\nu_9$        | 6 1 5   | 6 4 2   | 2446.2962 | 0.43 | $0.49 \times 10^{-3}$  | $\nu_3 + \nu_4$ | 8 7 2   | 8 8 1   |
| 2442.5328 | 0.16 | $0.94 \times 10^{-3}$  | $\nu_5 + \nu_7$ | 5 2 4   | 4 4 1   | 2446.3158 | 1.13 | $0.67 \times 10^{-2}$  | $\nu_3 + \nu_4$ | 8 7 1   | 8 8 0   |
| 2442.7286 | 0.56 | $0.76 \times 10^{-3}$  | $2\nu_9$        | 7 1 7   | 7 2 6   | 2446.3949 | 0.70 | $-0.15 \times 10^{-2}$ | $2\nu_9$        | 1 1 1   | 2 0 2   |
| 2442.7952 | 2.59 | $0.66 \times 10^{-3}$  | $\nu_3 + \nu_4$ | 2 2 1   | 3 3 0   | 2446.4128 | 0.36 | $0.60 \times 10^{-2}$  | $\nu_3 + \nu_4$ | 10 2 8  | 10 5 5  |
| 2442.8253 | 1.11 | $-0.93 \times 10^{-3}$ | $2\nu_9$        | 1 1 0   | 2 2 1   | 2446.4534 | 0.28 | $-0.52 \times 10^{-3}$ | $2\nu_9$        | 9 3 7   | 9 4 6   |
| 2442.8483 | 0.46 | $0.26 \times 10^{-3}$  | $2\nu_9$        | 7 0 7   | 7 1 6   | 2446.4708 | 0.09 | $0.48 \times 10^{-2}$  | $\nu_5 + \nu_9$ | 10 0 10 | 11 3 8  |
| 2442.8692 | 0.43 | $0.44 \times 10^{-2}$  | $\nu_5 + \nu_7$ | 7 5 3   | 7 3 4   | 2446.5062 | 0.54 | $-0.66 \times 10^{-3}$ | $2\nu_9$        | 6 0 6   | 6 1 5   |
| 2442.8851 | 0.29 | $0.47 \times 10^{-2}$  | $2\nu_9$        | 9 6 4   | 9 7 3   | 2446.6105 | 0.34 | $0.12 \times 10^{-2}$  | $\nu_3 + \nu_4$ | 8 3 5   | 8 6 2   |
| 2442.9843 | 0.80 | $0.13 \times 10^{-2}$  | $\nu_3 + \nu_4$ | 3 2 2   | 4 1 3   | 2446.6105 | 0.34 | $0.12 \times 10^{-2}$  | $2\nu_9$        | 8 5 3   | 8 6 2   |
| 2443.0013 | 0.39 | $-0.43 \times 10^{-2}$ | $\nu_3 + \nu_4$ | 11 4 7  | 11 7 4  | 2446.6419 | 0.10 | $-0.23 \times 10^{-2}$ | $\nu_5 + \nu_7$ | 6 1 6   | 5 3 3   |
| 2443.0116 | 0.66 | $0.60 \times 10^{-2}$  | $\nu_3 + \nu_4$ | 11 4 7  | 11 7 4  | 2446.7733 | 0.18 | $0.24 \times 10^{-2}$  | $\nu_5 + \nu_7$ | 6 5 1   | 6 3 4   |
| 2443.0116 | 0.66 | $0.21 \times 10^{-3}$  | $\nu_5 + \nu_7$ | 3 2 2   | 2 2 1   | 2446.7963 | 0.52 | $0.43 \times 10^{-2}$  | $\nu_3 + \nu_4$ | 9 3 6   | 9 6 3   |
| 2443.1226 | 0.59 | $0.80 \times 10^{-4}$  | $\nu_5 + \nu_7$ | 3 2 1   | 2 2 0   | 2446.7963 | 0.52 | $0.43 \times 10^{-2}$  | $2\nu_9$        | 9 5 4   | 9 6 3   |
| 2443.1794 | 1.80 | $0.91 \times 10^{-3}$  | $\nu_3 + \nu_4$ | 2 2 0   | 3 3 1   | 2446.7963 | 0.52 | $-0.92 \times 10^{-3}$ | $2\nu_9$        | 8 5 4   | 8 6 3   |
| 2443.3627 | 0.27 | $-0.91 \times 10^{-3}$ | $2\nu_9$        | 10 3 8  | 10 4 7  | 2446.8315 | 0.12 | $0.39 \times 10^{-2}$  | $\nu_5 + \nu_7$ | 5 5 1   | 5 3 2   |
| 2443.4570 | 0.32 | $0.46 \times 10^{-2}$  | $\nu_3 + \nu_4$ | 9 8 1   | 9 9 0   | 2446.9284 | 0.15 | $0.27 \times 10^{-2}$  | $\nu_5 + \nu_7$ | 5 1 4   | 4 3 1   |
| 2443.5590 | 0.54 | $-0.87 \times 10^{-3}$ | $\nu_5 + \nu_9$ | 13 13 1 | 14 14 1 | 2446.9952 | 0.72 | $-0.46 \times 10^{-3}$ | $\nu_3 + \nu_4$ | 9 7 3   | 9 8 2   |
| 2443.5590 | 0.54 | $-0.88 \times 10^{-3}$ | $\nu_5 + \nu_9$ | 13 13 0 | 14 14 0 | 2447.0454 | 1.38 | $-0.46 \times 10^{-3}$ | $\nu_5 + \nu_7$ | 4 0 4   | 3 0 3   |
| 2443.6100 | 0.33 | $0.13 \times 10^{-2}$  | $\nu_3 + \nu_4$ | 3 3 1   | 4 2 2   | 2447.0674 | 1.38 | $0.50 \times 10^{-3}$  | $\nu_3 + \nu_4$ | 2 1 1   | 3 2 2   |
| 2443.8062 | 2.53 | $-0.37 \times 10^{-3}$ | $\nu_3 + \nu_4$ | 3 0 3   | 4 1 4   | 2447.0860 | 0.47 | $-0.86 \times 10^{-3}$ | $\nu_3 + \nu_4$ | 9 7 2   | 9 8 1   |
| 2443.8344 | 0.41 | $-0.41 \times 10^{-2}$ | $\nu_3 + \nu_4$ | 7 2 6   | 7 5 3   | 2447.0860 | 0.47 | $-0.86 \times 10^{-3}$ | $2\nu_9$        | 9 9 0   | 9 8 1   |
| 2443.9084 | 1.69 | $0.94 \times 10^{-3}$  | $\nu_3 + \nu_4$ | 3 1 3   | 4 0 4   | 2447.2941 | 1.12 | $-0.14 \times 10^{-2}$ | $\nu_5 + \nu_7$ | 4 1 4   | 3 1 3   |
| 2443.9625 | 1.43 | $-0.18 \times 10^{-2}$ | $\nu_5 + \nu_9$ | 9 7 2   | 10 10 0 | 2447.2941 | 1.12 | $0.64 \times 10^{-2}$  | $\nu_5 + \nu_9$ | 13 2 12 | 14 3 12 |
| 2443.9625 | 1.43 | $0.30 \times 10^{-2}$  | $\nu_5 + \nu_9$ | 9 7 3   | 10 10 1 | 2447.5140 | 0.12 | $-0.77 \times 10^{-3}$ | $\nu_5 + \nu_7$ | 3 2 1   | 2 0 2   |
| 2444.0106 | 0.27 | $0.23 \times 10^{-2}$  | $\nu_5 + \nu_9$ | 14 5 10 | 15 6 10 | 2447.5436 | 0.10 | $0.33 \times 10^{-2}$  | $\nu_5 + \nu_7$ | 5 5 0   | 5 3 3   |
| 2444.0505 | 0.35 | $-0.25 \times 10^{-2}$ | $\nu_5 + \nu_9$ | 14 8 6  | 15 9 6  | 2447.5769 | 0.58 | $0.11 \times 10^{-2}$  | $\nu_5 + \nu_9$ | 13 10 4 | 14 11 4 |
| 2444.0836 | 0.61 | $0.20 \times 10^{-2}$  | $\nu_3 + \nu_4$ | 10 8 3  | 10 9 2  | 2447.5769 | 0.58 | $0.89 \times 10^{-3}$  | $\nu_5 + \nu_9$ | 13 10 3 | 14 11 3 |
| 2444.1100 | 0.19 | $0.70 \times 10^{-4}$  | $\nu_3 + \nu_4$ | 10 8 2  | 10 9 1  | 2447.6300 | 0.97 | $-0.16 \times 10^{-2}$ | $2\nu_9$        | 7 2 6   | 7 3 5   |
| 2444.2386 | 0.09 | $0.26 \times 10^{-2}$  | $2\nu_9$        | 6 5 2   | 6 6 1   | 2447.7053 | 0.40 | $0.37 \times 10^{-2}$  | $\nu_5 + \nu_7$ | 6 3 3   | 5 5 0   |
| 2444.4419 | 0.15 | $0.20 \times 10^{-2}$  | $2\nu_9$        | 12 3 9  | 12 4 8  | 2447.8571 | 2.84 | $0.32 \times 10^{-2}$  | $\nu_5 + \nu_7$ | 4 1 3   | 3 1 2   |
| 2444.4910 | 0.13 | $0.12 \times 10^{-2}$  | $2\nu_9$        | 5 1 4   | 5 4 1   | 2447.9158 | 0.63 | $0.20 \times 10^{-2}$  | $\nu_3 + \nu_4$ | 10 7 4  | 10 8 3  |
| 2444.6724 | 0.24 | $-0.44 \times 10^{-3}$ | $\nu_5 + \nu_7$ | 8 3 5   | 8 1 8   | 2447.9158 | 0.63 | $-0.39 \times 10^{-2}$ | $2\nu_9$        | 10 4 7  | 10 5 6  |
| 2444.7642 | 0.88 | $0.13 \times 10^{-2}$  | $\nu_3 + \nu_4$ | 2 1 2   | 3 2 1   | 2448.0489 | 0.12 | $0.67 \times 10^{-3}$  | $2\nu_9$        | 5 4 2   | 5 5 1   |
| 2444.8986 | 0.54 | $-0.71 \times 10^{-3}$ | $\nu_5 + \nu_9$ | 13 12 1 | 14 13 1 | 2448.1006 | 0.25 | $-0.25 \times 10^{-2}$ | $2\nu_9$        | 3 0 3   | 3 3 0   |
| 2444.8986 | 0.54 | $-0.72 \times 10^{-3}$ | $\nu_5 + \nu_9$ | 13 12 2 | 14 13 2 | 2448.3277 | 0.34 | $-0.30 \times 10^{-2}$ | $\nu_3 + \nu_4$ | 10 7 3  | 10 8 2  |
| 2445.0628 | 0.30 | $0.45 \times 10^{-2}$  | $\nu_5 + \nu_7$ | 6 5 2   | 6 3 3   | 2448.5701 | 0.34 | $0.27 \times 10^{-2}$  | $\nu_3 + \nu_4$ | 9 2 7   | 9 5 4   |
| 2445.0985 | 0.34 | $0.56 \times 10^{-2}$  | $\nu_3 + \nu_4$ | 4 2 2   | 5 1 5   | 2448.7810 | 0.44 | $-0.36 \times 10^{-2}$ | $\nu_5 + \nu_9$ | 13 3 11 | 14 4 11 |

| (I)       | (II) | (III)                  | (IV)            | (V)     | (VI)    | (I)       | (II) | (III)                  | (IV)            | (V)     | (VI)    |
|-----------|------|------------------------|-----------------|---------|---------|-----------|------|------------------------|-----------------|---------|---------|
| 2448.8049 | 0.34 | $-0.21 \times 10^{-2}$ | $2\nu_9$        | 8 3 6   | 8 4 5   | 2452.6711 | 0.77 | $0.13 \times 10^{-2}$  | $\nu_3 + \nu_4$ | 6 5 1   | 6 6 0   |
| 2448.8860 | 0.52 | $-0.53 \times 10^{-3}$ | $2\nu_9$        | 7 1 6   | 7 2 5   | 2452.7087 | 0.59 | $0.79 \times 10^{-3}$  | $2\nu_9$        | 4 2 3   | 4 3 2   |
| 2448.9553 | 0.14 | $-0.45 \times 10^{-2}$ | $\nu_5 + \nu_9$ | 10 5 6  | 11 8 4  | 2452.7525 | 0.21 | $-0.40 \times 10^{-2}$ | $\nu_5 + \nu_7$ | 10 3 7  | 10 1 10 |
| 2448.9802 | 0.48 | $0.57 \times 10^{-2}$  | $\nu_3 + \nu_4$ | 11 7 5  | 11 8 4  | 2452.7525 | 0.21 | $0.67 \times 10^{-3}$  | $\nu_5 + \nu_7$ | 7 2 6   | 6 4 3   |
| 2449.0069 | 0.48 | $-0.24 \times 10^{-2}$ | $\nu_5 + \nu_9$ | 13 9 4  | 14 10 4 | 2452.7720 | 0.52 | $0.16 \times 10^{-2}$  | $2\nu_9$        | 4 0 4   | 4 1 3   |
| 2449.0069 | 0.48 | $0.29 \times 10^{-2}$  | $\nu_5 + \nu_9$ | 13 9 5  | 14 10 5 | 2452.7863 | 0.33 | $0.41 \times 10^{-2}$  | $\nu_5 + \nu_9$ | 13 7 6  | 14 8 6  |
| 2449.0675 | 0.84 | $-0.41 \times 10^{-3}$ | $\nu_5 + \nu_7$ | 4 2 3   | 3 2 2   | 2452.8028 | 0.13 | $0.61 \times 10^{-2}$  | $\nu_3 + \nu_4$ | 6 0 6   | 6 3 3   |
| 2449.1381 | 1.54 | $-0.50 \times 10^{-3}$ | $\nu_5 + \nu_7$ | 4 2 2   | 3 2 1   | 2452.8028 | 0.13 | $-0.54 \times 10^{-3}$ | $\nu_5 + \nu_7$ | 14 4 10 | 14 2 13 |
| 2449.1381 | 1.54 | $0.61 \times 10^{-3}$  | $\nu_5 + \nu_7$ | 12 6 6  | 12 4 9  | 2452.8308 | 0.46 | $0.40 \times 10^{-2}$  | $\nu_5 + \nu_7$ | 7 3 5   | 6 5 2   |
| 2449.1879 | 0.45 | $0.18 \times 10^{-2}$  | $2\nu_9$        | 5 1 5   | 5 2 4   | 2452.8308 | 0.46 | $-0.54 \times 10^{-2}$ | $\nu_5 + \nu_9$ | 13 6 8  | 14 7 8  |
| 2449.2790 | 0.56 | $0.18 \times 10^{-2}$  | $\nu_3 + \nu_4$ | 7 6 2   | 7 7 1   | 2452.9181 | 1.92 | $0.74 \times 10^{-3}$  | $\nu_3 + \nu_4$ | 1 1 0   | 2 2 1   |
| 2449.2926 | 0.24 | $0.63 \times 10^{-2}$  | $\nu_3 + \nu_4$ | 5 1 5   | 5 4 2   | 2452.9392 | 0.78 | $-0.50 \times 10^{-2}$ | $\nu_5 + \nu_7$ | 3 3 0   | 2 1 1   |
| 2449.2926 | 0.24 | $0.17 \times 10^{-2}$  | $2\nu_9$        | 9 4 6   | 9 5 5   | 2452.9392 | 0.78 | $0.58 \times 10^{-2}$  | $\nu_5 + \nu_9$ | 12 11 2 | 13 12 2 |
| 2449.3262 | 0.61 | $0.18 \times 10^{-2}$  | $\nu_3 + \nu_4$ | 7 6 1   | 7 7 0   | 2452.9392 | 0.78 | $0.58 \times 10^{-2}$  | $\nu_5 + \nu_9$ | 12 11 1 | 13 12 1 |
| 2449.3776 | 0.26 | $0.55 \times 10^{-3}$  | $\nu_5 + \nu_7$ | 11 4 7  | 11 2 10 | 2453.1199 | 0.11 | $0.25 \times 10^{-3}$  | $\nu_5 + \nu_7$ | 7 6 2   | 7 4 3   |
| 2449.4243 | 0.21 | $-0.62 \times 10^{-2}$ | $\nu_3 + \nu_4$ | 8 1 7   | 8 4 4   | 2453.1469 | 0.26 | $0.78 \times 10^{-3}$  | $2\nu_9$        | 3 2 2   | 3 3 1   |
| 2449.5038 | 0.22 | $0.32 \times 10^{-3}$  | $\nu_5 + \nu_7$ | 11 6 5  | 11 4 8  | 2453.2219 | 1.03 | $-0.18 \times 10^{-2}$ | $\nu_5 + \nu_7$ | 5 0 5   | 4 0 4   |
| 2449.7583 | 0.22 | $0.23 \times 10^{-3}$  | $\nu_5 + \nu_9$ | 9 6 3   | 10 9 1  | 2453.2508 | 0.16 | $0.39 \times 10^{-2}$  | $\nu_3 + \nu_4$ | 12 7 5  | 12 8 4  |
| 2449.7723 | 0.17 | $0.43 \times 10^{-2}$  | $2\nu_9$        | 8 4 5   | 8 5 4   | 2453.2903 | 0.90 | $0.12 \times 10^{-2}$  | $\nu_3 + \nu_4$ | 7 5 3   | 7 6 2   |
| 2449.8328 | 0.57 | $0.19 \times 10^{-2}$  | $2\nu_9$        | 5 0 5   | 5 1 4   | 2453.3597 | 0.16 | $0.22 \times 10^{-2}$  | $\nu_5 + \nu_7$ | 10 3 8  | 11 6 6  |
| 2449.8491 | 0.61 | $0.20 \times 10^{-2}$  | $\nu_3 + \nu_4$ | 2 2 1   | 3 1 2   | 2453.4023 | 1.52 | $-0.26 \times 10^{-2}$ | $\nu_5 + \nu_7$ | 5 1 5   | 4 1 4   |
| 2449.8610 | 1.60 | $0.21 \times 10^{-3}$  | $\nu_3 + \nu_4$ | 2 0 2   | 3 1 3   | 2453.4023 | 1.52 | $0.98 \times 10^{-3}$  | $2\nu_9$        | 3 1 3   | 3 2 2   |
| 2449.9796 | 0.40 | $0.22 \times 10^{-2}$  | $\nu_3 + \nu_4$ | 8 2 6   | 8 5 3   | 2453.4790 | 0.25 | $-0.34 \times 10^{-2}$ | $\nu_3 + \nu_4$ | 13 6 8  | 13 7 7  |
| 2450.0197 | 0.59 | $0.18 \times 10^{-3}$  | $2\nu_9$        | 6 2 5   | 6 3 4   | 2453.5354 | 0.69 | $-0.76 \times 10^{-3}$ | $\nu_5 + \nu_7$ | 11 7 5  | 11 5 6  |
| 2450.0374 | 0.78 | $-0.10 \times 10^{-3}$ | $\nu_3 + \nu_4$ | 8 6 3   | 8 7 2   | 2453.6765 | 0.26 | $0.59 \times 10^{-2}$  | $\nu_3 + \nu_4$ | 14 6 9  | 14 7 8  |
| 2450.1177 | 0.45 | $0.63 \times 10^{-2}$  | $\nu_5 + \nu_9$ | 13 4 10 | 14 5 10 | 2453.7255 | 0.39 | $-0.39 \times 10^{-2}$ | $\nu_5 + \nu_9$ | 10 1 9  | 11 4 7  |
| 2450.1724 | 1.99 | $0.88 \times 10^{-3}$  | $\nu_3 + \nu_4$ | 2 1 2   | 3 0 3   | 2453.7617 | 0.35 | $0.71 \times 10^{-3}$  | $\nu_3 + \nu_4$ | 6 1 5   | 6 4 2   |
| 2450.1724 | 1.99 | $0.55 \times 10^{-2}$  | $\nu_5 + \nu_9$ | 13 2 11 | 14 3 11 | 2453.8069 | 0.25 | $-0.19 \times 10^{-2}$ | $\nu_5 + \nu_7$ | 7 3 4   | 6 5 1   |
| 2450.2731 | 0.27 | $-0.50 \times 10^{-2}$ | $\nu_5 + \nu_7$ | 10 6 4  | 10 4 7  | 2453.8642 | 1.49 | $0.24 \times 10^{-2}$  | $\nu_5 + \nu_7$ | 5 1 4   | 4 1 3   |
| 2450.3118 | 0.71 | $-0.84 \times 10^{-3}$ | $\nu_3 + \nu_4$ | 8 6 2   | 8 7 1   | 2453.9908 | 1.08 | $-0.67 \times 10^{-3}$ | $\nu_3 + \nu_4$ | 7 5 2   | 7 6 1   |
| 2450.3483 | 0.28 | $-0.17 \times 10^{-2}$ | $2\nu_9$        | 7 3 5   | 7 4 4   | 2454.1173 | 1.16 | $0.11 \times 10^{-2}$  | $\nu_3 + \nu_4$ | 8 5 4   | 8 6 3   |
| 2450.4164 | 0.20 | $0.12 \times 10^{-2}$  | $\nu_3 + \nu_4$ | 5 2 3   | 5 5 0   | 2454.2070 | 0.59 | $0.40 \times 10^{-2}$  | $\nu_5 + \nu_7$ | 8 1 8   | 7 3 5   |
| 2450.4848 | 1.11 | $-0.37 \times 10^{-2}$ | $\nu_5 + \nu_7$ | 6 2 4   | 5 4 1   | 2454.2070 | 0.59 | $0.17 \times 10^{-2}$  | $\nu_5 + \nu_9$ | 12 0 12 | 13 1 12 |
| 2450.5371 | 0.40 | $0.42 \times 10^{-2}$  | $\nu_5 + \nu_9$ | 13 8 6  | 14 9 6  | 2454.2070 | 0.59 | $-0.62 \times 10^{-3}$ | $\nu_5 + \nu_9$ | 12 1 12 | 13 2 12 |
| 2450.5721 | 0.14 | $-0.35 \times 10^{-2}$ | $\nu_5 + \nu_7$ | 7 1 7   | 6 3 4   | 2454.3084 | 0.11 | $0.28 \times 10^{-2}$  | $\nu_5 + \nu_7$ | 3 3 1   | 2 1 2   |
| 2450.6204 | 0.29 | $-0.40 \times 10^{-2}$ | $\nu_5 + \nu_9$ | 10 2 9  | 11 5 7  | 2454.3338 | 0.79 | $0.31 \times 10^{-2}$  | $\nu_5 + \nu_9$ | 12 10 2 | 13 11 2 |
| 2450.6204 | 0.29 | $0.49 \times 10^{-2}$  | $\nu_5 + \nu_9$ | 13 8 5  | 14 9 5  | 2454.3338 | 0.79 | $0.32 \times 10^{-2}$  | $\nu_5 + \nu_9$ | 12 10 3 | 13 11 3 |
| 2450.7524 | 0.58 | $0.13 \times 10^{-2}$  | $\nu_3 + \nu_4$ | 7 2 5   | 7 5 2   | 2454.3792 | 0.20 | $-0.37 \times 10^{-2}$ | $\nu_5 + \nu_7$ | 14 8 7  | 14 6 8  |
| 2450.9112 | 0.14 | $-0.83 \times 10^{-3}$ | $\nu_3 + \nu_4$ | 4 1 4   | 4 4 1   | 2454.3792 | 0.20 | $0.19 \times 10^{-2}$  | $2\nu_9$        | 8 4 4   | 8 5 3   |
| 2450.9112 | 0.14 | $0.21 \times 10^{-2}$  | $\nu_5 + \nu_7$ | 8 6 3   | 8 4 4   | 2454.5470 | 0.15 | $-0.24 \times 10^{-3}$ | $\nu_5 + \nu_7$ | 4 2 2   | 3 0 3   |
| 2450.9494 | 0.38 | $0.75 \times 10^{-3}$  | $\nu_3 + \nu_4$ | 6 2 4   | 6 5 1   | 2454.6130 | 0.53 | $0.18 \times 10^{-2}$  | $2\nu_9$        | 2 1 2   | 2 2 1   |
| 2450.9688 | 1.65 | $0.88 \times 10^{-3}$  | $\nu_3 + \nu_4$ | 9 6 4   | 9 7 3   | 2454.6236 | 1.00 | $0.19 \times 10^{-2}$  | $2\nu_9$        | 5 1 4   | 5 2 3   |
| 2451.0059 | 0.20 | $-0.28 \times 10^{-2}$ | $2\nu_9$        | 4 3 2   | 4 4 1   | 2454.6236 | 1.00 | $-0.65 \times 10^{-2}$ | $2\nu_9$        | 7 2 5   | 7 3 4   |
| 2451.1145 | 0.86 | $0.13 \times 10^{-2}$  | $2\nu_9$        | 6 3 4   | 6 4 3   | 2454.8159 | 0.82 | $0.10 \times 10^{-2}$  | $\nu_3 + \nu_4$ | 9 5 5   | 9 6 4   |
| 2451.1309 | 1.78 | $0.15 \times 10^{-2}$  | $\nu_5 + \nu_9$ | 10 5 5  | 11 8 3  | 2454.8961 | 0.52 | $-0.44 \times 10^{-2}$ | $\nu_3 + \nu_4$ | 5 1 4   | 5 4 1   |
| 2451.2477 | 0.21 | $0.70 \times 10^{-4}$  | $2\nu_9$        | 5 3 3   | 5 4 2   | 2454.9411 | 1.61 | $-0.65 \times 10^{-3}$ | $\nu_5 + \nu_7$ | 5 2 3   | 4 2 2   |
| 2451.3394 | 0.43 | $-0.19 \times 10^{-2}$ | $\nu_5 + \nu_7$ | 9 6 3   | 9 4 6   | 2454.9411 | 1.61 | $-0.51 \times 10^{-2}$ | $2\nu_9$        | 6 3 3   | 6 4 2   |
| 2451.4424 | 0.76 | $-0.41 \times 10^{-3}$ | $2\nu_9$        | 0 0 0   | 1 1 1   | 2454.9846 | 0.44 | $-0.31 \times 10^{-2}$ | $\nu_5 + \nu_7$ | 6 6 0   | 6 4 3   |
| 2451.5454 | 1.30 | $-0.36 \times 10^{-3}$ | $\nu_5 + \nu_7$ | 15 6 9  | 15 4 12 | 2455.0499 | 1.25 | $-0.92 \times 10^{-3}$ | $\nu_5 + \nu_7$ | 5 2 4   | 4 2 3   |
| 2451.5454 | 1.30 | $0.49 \times 10^{-3}$  | $\nu_5 + \nu_9$ | 12 12 1 | 13 13 1 | 2455.1084 | 0.17 | $-0.48 \times 10^{-2}$ | $2\nu_9$        | 9 3 6   | 9 4 5   |
| 2451.5454 | 1.30 | $0.49 \times 10^{-3}$  | $\nu_5 + \nu_9$ | 12 12 0 | 13 13 0 | 2455.1553 | 0.84 | $-0.20 \times 10^{-3}$ | $\nu_3 + \nu_4$ | 13 5 9  | 13 6 8  |
| 2451.5982 | 0.63 | $0.17 \times 10^{-2}$  | $2\nu_9$        | 4 1 4   | 4 2 3   | 2455.1553 | 0.84 | $-0.38 \times 10^{-3}$ | $2\nu_9$        | 3 0 3   | 3 1 2   |
| 2451.6847 | 0.15 | $0.70 \times 10^{-3}$  | $2\nu_9$        | 4 3 1   | 4 4 0   | 2455.2025 | 0.54 | $0.31 \times 10^{-2}$  | $2\nu_9$        | 14 2 13 | 14 1 14 |
| 2451.7077 | 0.64 | $0.28 \times 10^{-2}$  | $2\nu_9$        | 5 2 4   | 5 3 3   | 2455.2025 | 0.54 | $0.28 \times 10^{-3}$  | $2\nu_9$        | 14 1 13 | 14 0 14 |
| 2451.9212 | 0.68 | $0.21 \times 10^{-2}$  | $\nu_3 + \nu_4$ | 10 6 5  | 10 7 4  | 2455.2428 | 0.79 | $-0.23 \times 10^{-2}$ | $\nu_3 + \nu_4$ | 10 5 6  | 10 6 5  |
| 2451.9329 | 0.40 | $0.61 \times 10^{-3}$  | $\nu_5 + \nu_9$ | 13 5 9  | 14 6 9  | 2455.2714 | 0.36 | $0.42 \times 10^{-2}$  | $\nu_5 + \nu_9$ | 13 4 9  | 14 5 9  |
| 2452.0384 | 0.40 | $0.15 \times 10^{-3}$  | $\nu_5 + \nu_9$ | 13 7 7  | 14 8 7  | 2455.3116 | 1.06 | $-0.44 \times 10^{-2}$ | $\nu_3 + \nu_4$ | 16 2 14 | 16 3 13 |
| 2452.0836 | 0.17 | $0.63 \times 10^{-2}$  | $2\nu_9$        | 7 4 3   | 7 5 2   | 2455.4011 | 0.25 | $-0.24 \times 10^{-2}$ | $\nu_3 + \nu_4$ | 4 1 3   | 4 4 0   |
| 2452.0979 | 0.40 | $0.74 \times 10^{-3}$  | $2\nu_9$        | 6 1 5   | 6 2 4   | 2455.4011 | 0.25 | $0.46 \times 10^{-2}$  | $\nu_3 + \nu_4$ | 11 5 7  | 11 6 6  |
| 2452.2154 | 1.18 | $0.13 \times 10^{-2}$  | $\nu_3 + \nu_4$ | 1 1 1   | 2 2 0   | 2455.4142 | 0.20 | $-0.44 \times 10^{-2}$ | $\nu_3 + \nu_4$ | 15 2 13 | 15 3 12 |
| 2452.4523 | 0.38 | $0.39 \times 10^{-2}$  | $\nu_5 + \nu_7$ | 6 1 5   | 5 3 2   | 2455.4142 | 0.20 | $-0.12 \times 10^{-2}$ | $\nu_3 + \nu_4$ | 15 3 13 | 15 4 12 |
| 2452.4778 | 0.14 | $-0.62 \times 10^{-2}$ | $2\nu_9$        | 10 3 7  | 10 4 6  | 2455.4291 | 0.28 | $-0.50 \times 10^{-2}$ | $\nu_5 + \nu_7$ | 8 0 8   | 7 2 5   |
| 2452.4961 | 0.27 | $0.36 \times 10^{-2}$  | $2\nu_9$        | 15 1 14 | 15 0 15 | 2455.5850 | 0.52 | $-0.18 \times 10^{-2}$ | $2\nu_9$        | 4 2 2   | 4 3 1   |
| 2452.4961 | 0.27 | $-0.47 \times 10^{-2}$ | $2\nu_9$        | 15 2 14 | 15 1 15 | 2455.6034 | 1.20 | $-0.38 \times 10^{-2}$ | $\nu_3 + \nu_4$ | 5 0 5   | 5 3 2   |
| 2452.5181 | 1.02 | $0.15 \times 10^{-3}$  | $\nu_3 + \nu_4$ | 6 5 2   | 6 6 1   | 2455.6194 | 0.58 | $-0.39 \times 10^{-2}$ | $\nu_3 + \nu_4$ | 14 3 12 | 14 4 11 |
| 2452.5683 | 0.20 | $0.59 \times 10^{-2}$  | $\nu_5 + \nu_7$ | 8 6 2   | 8 4 5   | 2455.6194 | 0.58 | $0.50 \times 10^{-2}$  | $\nu_5 + \nu_9$ | 12 2 11 | 13 3 11 |
| 2452.6123 | 0.18 | $-0.38 \times 10^{-2}$ | $\nu_5 + \nu_7$ | 7 0 7   | 6 2 4   | 2455.6341 | 0.34 | $0.34 \times 10^{-2}$  | $\nu_5 + \nu_9$ | 13 6 7  | 14 7 7  |

| (I)       | (II) | (III)                  | (IV)            | (V)     | (VI)    | (I)       | (II) | (III)                  | (IV)            | (V)     | (VI)    |
|-----------|------|------------------------|-----------------|---------|---------|-----------|------|------------------------|-----------------|---------|---------|
| 2455.6459 | 0.17 | $0.37 \times 10^{-2}$  | $\nu_3 + \nu_4$ | 14 2 12 | 14 3 11 | 2458.8663 | 0.59 | $0.28 \times 10^{-2}$  | $2\nu_9$        | 10 2 8  | 10 3 7  |
| 2455.6702 | 0.21 | $-0.89 \times 10^{-3}$ | $\nu_3 + \nu_4$ | 13 4 10 | 13 5 9  | 2458.8796 | 0.46 | $-0.17 \times 10^{-2}$ | $\nu_5 + \nu_9$ | 12 7 6  | 13 8 6  |
| 2455.7746 | 0.92 | $-0.11 \times 10^{-2}$ | $\nu_5 + \nu_9$ | 12 9 3  | 13 10 3 | 2458.9461 | 0.62 | $-0.52 \times 10^{-2}$ | $\nu_3 + \nu_4$ | 9 1 8   | 9 2 7   |
| 2455.7746 | 0.92 | $-0.20 \times 10^{-4}$ | $\nu_5 + \nu_9$ | 12 9 4  | 13 10 4 | 2459.1011 | 1.42 | $-0.67 \times 10^{-3}$ | $\nu_3 + \nu_4$ | 8 3 6   | 8 4 5   |
| 2455.8275 | 1.83 | $0.30 \times 10^{-3}$  | $\nu_3 + \nu_4$ | 1 0 1   | 2 1 2   | 2459.1011 | 1.42 | $0.55 \times 10^{-2}$  | $\nu_3 + \nu_4$ | 10 0 10 | 10 1 9  |
| 2455.9558 | 1.27 | $0.27 \times 10^{-2}$  | $\nu_3 + \nu_4$ | 13 3 11 | 13 4 10 | 2459.1328 | 0.29 | $-0.70 \times 10^{-4}$ | $\nu_3 + \nu_4$ | 3 0 3   | 3 3 0   |
| 2456.0339 | 0.91 | $0.16 \times 10^{-2}$  | $\nu_3 + \nu_4$ | 5 4 2   | 5 5 1   | 2459.1656 | 1.10 | $0.15 \times 10^{-2}$  | $\nu_5 + \nu_9$ | 12 7 5  | 13 8 5  |
| 2456.0339 | 0.91 | $-0.28 \times 10^{-2}$ | $\nu_3 + \nu_4$ | 13 2 11 | 13 3 10 | 2459.2216 | 0.14 | $0.32 \times 10^{-3}$  | $\nu_5 + \nu_9$ | 10 4 6  | 11 7 4  |
| 2456.1033 | 1.01 | $-0.34 \times 10^{-2}$ | $\nu_3 + \nu_4$ | 8 5 3   | 8 6 2   | 2459.2944 | 0.35 | $0.11 \times 10^{-2}$  | $\nu_5 + \nu_7$ | 9 7 3   | 9 5 4   |
| 2456.1033 | 1.01 | $-0.36 \times 10^{-2}$ | $2\nu_9$        | 6 2 4   | 6 3 3   | 2459.4141 | 1.78 | $-0.36 \times 10^{-2}$ | $\nu_5 + \nu_7$ | 6 0 6   | 5 0 5   |
| 2456.2089 | 0.79 | $0.59 \times 10^{-2}$  | $2\nu_9$        | 7 3 4   | 7 4 3   | 2459.4582 | 1.79 | $-0.49 \times 10^{-2}$ | $\nu_3 + \nu_4$ | 8 2 7   | 8 3 6   |
| 2456.2089 | 0.79 | $-0.53 \times 10^{-2}$ | $2\nu_9$        | 9 4 5   | 9 5 4   | 2459.4582 | 1.79 | $-0.98 \times 10^{-3}$ | $\nu_3 + \nu_4$ | 9 0 9   | 9 1 8   |
| 2456.2089 | 0.79 | $0.42 \times 10^{-3}$  | $2\nu_9$        | 4 1 3   | 4 2 2   | 2459.5265 | 0.79 | $-0.30 \times 10^{-2}$ | $\nu_5 + \nu_7$ | 6 1 6   | 5 1 5   |
| 2456.2408 | 0.26 | $-0.68 \times 10^{-2}$ | $\nu_3 + \nu_4$ | 12 4 9  | 12 5 8  | 2459.5639 | 1.65 | $0.93 \times 10^{-3}$  | $\nu_3 + \nu_4$ | 4 3 2   | 4 4 1   |
| 2456.3302 | 1.01 | $0.28 \times 10^{-2}$  | $\nu_5 + \nu_9$ | 8 6 3   | 9 9 1   | 2459.6439 | 1.07 | $-0.63 \times 10^{-3}$ | $\nu_3 + \nu_4$ | 7 3 5   | 7 4 4   |
| 2456.3774 | 0.19 | $-0.23 \times 10^{-2}$ | $2\nu_9$        | 8 3 5   | 8 4 4   | 2459.6887 | 1.15 | $-0.68 \times 10^{-2}$ | $\nu_5 + \nu_9$ | 11 11 0 | 12 12 0 |
| 2456.4419 | 1.11 | $0.22 \times 10^{-2}$  | $\nu_3 + \nu_4$ | 5 4 1   | 5 5 0   | 2459.6887 | 1.15 | $-0.68 \times 10^{-2}$ | $\nu_5 + \nu_9$ | 11 11 1 | 12 12 1 |
| 2456.5057 | 0.50 | $-0.13 \times 10^{-2}$ | $2\nu_9$        | 2 1 1   | 2 2 0   | 2459.8035 | 0.93 | $-0.55 \times 10^{-2}$ | $2\nu_9$        | 12 2 11 | 12 1 12 |
| 2456.6073 | 0.85 | $0.92 \times 10^{-3}$  | $\nu_3 + \nu_4$ | 1 1 1   | 2 0 2   | 2459.8035 | 0.93 | $-0.60 \times 10^{-2}$ | $2\nu_9$        | 12 1 11 | 12 0 12 |
| 2456.6610 | 0.38 | $0.50 \times 10^{-2}$  | $\nu_3 + \nu_4$ | 12 2 10 | 12 3 9  | 2459.8717 | 1.45 | $0.12 \times 10^{-2}$  | $\nu_3 + \nu_4$ | 5 3 3   | 5 4 2   |
| 2456.6806 | 1.68 | $0.29 \times 10^{-2}$  | $\nu_3 + \nu_4$ | 6 4 3   | 6 5 2   | 2459.8954 | 0.75 | $0.57 \times 10^{-2}$  | $\nu_3 + \nu_4$ | 11 3 8  | 11 4 7  |
| 2456.7236 | 0.24 | $0.14 \times 10^{-2}$  | $\nu_5 + \nu_7$ | 7 2 5   | 6 4 2   | 2459.9193 | 1.96 | 0.00E+00               | $\nu_3 + \nu_4$ | 6 3 4   | 6 4 3   |
| 2456.7502 | 1.06 | $-0.42 \times 10^{-2}$ | $\nu_3 + \nu_4$ | 14 1 13 | 14 2 12 | 2459.9415 | 1.76 | $0.38 \times 10^{-2}$  | $\nu_5 + \nu_7$ | 6 1 5   | 5 1 4   |
| 2456.7502 | 1.06 | $-0.10 \times 10^{-2}$ | $2\nu_9$        | 3 1 2   | 3 2 1   | 2459.9676 | 0.62 | $-0.27 \times 10^{-2}$ | $\nu_5 + \nu_7$ | 8 3 5   | 7 5 2   |
| 2456.7748 | 0.69 | $-0.31 \times 10^{-2}$ | $\nu_3 + \nu_4$ | 14 2 13 | 14 3 12 | 2460.0346 | 1.03 | $-0.89 \times 10^{-3}$ | $2\nu_9$        | 1 1 0   | 1 0 1   |
| 2456.7748 | 0.69 | $-0.35 \times 10^{-3}$ | $2\nu_9$        | 2 0 2   | 2 1 1   | 2460.0911 | 0.67 | $-0.65 \times 10^{-2}$ | $\nu_5 + \nu_9$ | 12 6 7  | 13 7 7  |
| 2456.9094 | 0.17 | $0.50 \times 10^{-2}$  | $\nu_3 + \nu_4$ | 11 4 8  | 11 5 7  | 2460.1057 | 0.57 | $-0.60 \times 10^{-2}$ | $\nu_3 + \nu_4$ | 8 1 7   | 8 2 6   |
| 2456.9997 | 0.35 | $0.65 \times 10^{-3}$  | $\nu_3 + \nu_4$ | 11 3 9  | 11 4 8  | 2460.2157 | 1.27 | $0.25 \times 10^{-2}$  | $\nu_3 + \nu_4$ | 7 4 3   | 7 5 2   |
| 2457.1076 | 0.37 | $-0.27 \times 10^{-2}$ | $\nu_3 + \nu_4$ | 12 1 11 | 12 2 10 | 2460.2988 | 0.41 | $0.62 \times 10^{-3}$  | $\nu_5 + \nu_9$ | 12 4 9  | 13 5 9  |
| 2457.1076 | 0.37 | $-0.47 \times 10^{-2}$ | $\nu_3 + \nu_4$ | 12 2 11 | 12 3 10 | 2460.3439 | 0.85 | $-0.40 \times 10^{-2}$ | $\nu_3 + \nu_4$ | 7 2 6   | 7 3 5   |
| 2457.1591 | 0.36 | $0.52 \times 10^{-2}$  | $\nu_5 + \nu_7$ | 7 1 6   | 6 3 3   | 2460.3439 | 0.85 | $0.34 \times 10^{-3}$  | $\nu_5 + \nu_9$ | 9 4 6   | 10 7 4  |
| 2457.2165 | 1.16 | $0.30 \times 10^{-2}$  | $\nu_3 + \nu_4$ | 7 4 4   | 7 5 3   | 2460.3862 | 1.04 | $0.13 \times 10^{-2}$  | $2\nu_9$        | 14 3 12 | 14 2 13 |
| 2457.2165 | 1.16 | $-0.38 \times 10^{-2}$ | $\nu_5 + \nu_9$ | 9 1 9   | 10 4 7  | 2460.3862 | 1.04 | $-0.81 \times 10^{-3}$ | $2\nu_9$        | 14 2 12 | 14 1 13 |
| 2457.2434 | 0.17 | $0.11 \times 10^{-2}$  | $\nu_5 + \nu_7$ | 8 2 7   | 7 4 4   | 2460.3948 | 1.38 | $0.14 \times 10^{-2}$  | $\nu_3 + \nu_4$ | 4 3 1   | 4 4 0   |
| 2457.3005 | 0.75 | $0.12 \times 10^{-2}$  | $\nu_5 + \nu_9$ | 12 8 5  | 13 9 5  | 2460.5246 | 1.16 | $0.38 \times 10^{-2}$  | $\nu_3 + \nu_4$ | 9 2 7   | 9 3 6   |
| 2457.3227 | 0.58 | $0.66 \times 10^{-3}$  | $\nu_5 + \nu_9$ | 12 8 4  | 13 9 4  | 2460.5246 | 1.16 | $-0.24 \times 10^{-2}$ | $\nu_5 + \nu_9$ | 12 3 9  | 13 4 9  |
| 2457.3806 | 1.02 | $-0.16 \times 10^{-2}$ | $\nu_5 + \nu_7$ | 5 3 2   | 4 3 1   | 2460.6200 | 2.25 | $-0.38 \times 10^{-3}$ | $\nu_5 + \nu_7$ | 6 2 4   | 5 2 3   |
| 2457.4304 | 1.16 | $0.16 \times 10^{-3}$  | $\nu_3 + \nu_4$ | 9 4 6   | 9 5 5   | 2460.6524 | 0.47 | $-0.22 \times 10^{-2}$ | $\nu_3 + \nu_4$ | 12 6 6  | 12 7 5  |
| 2457.4304 | 1.16 | $-0.48 \times 10^{-2}$ | $\nu_5 + \nu_7$ | 5 3 3   | 4 3 2   | 2460.6830 | 0.57 | $0.18 \times 10^{-2}$  | $\nu_5 + \nu_7$ | 5 4 1   | 4 4 0   |
| 2457.4832 | 1.27 | $0.57 \times 10^{-3}$  | $\nu_3 + \nu_4$ | 8 4 5   | 8 5 4   | 2460.6830 | 0.57 | $0.91 \times 10^{-3}$  | $\nu_5 + \nu_7$ | 5 4 2   | 4 4 1   |
| 2457.4832 | 1.27 | $0.25 \times 10^{-2}$  | $\nu_3 + \nu_4$ | 11 2 10 | 11 3 9  | 2460.7731 | 0.89 | $0.68 \times 10^{-2}$  | $\nu_3 + \nu_4$ | 7 0 7   | 7 1 6   |
| 2457.5137 | 0.36 | $0.21 \times 10^{-2}$  | $\nu_3 + \nu_4$ | 11 1 10 | 11 2 9  | 2460.8981 | 0.94 | $-0.11 \times 10^{-2}$ | $2\nu_9$        | 2 1 1   | 2 0 2   |
| 2457.5599 | 0.85 | $-0.75 \times 10^{-3}$ | $2\nu_9$        | 1 0 1   | 1 1 0   | 2460.9758 | 0.19 | $-0.21 \times 10^{-2}$ | $\nu_5 + \nu_9$ | 10 2 8  | 11 5 6  |
| 2457.5789 | 0.38 | $0.55 \times 10^{-2}$  | $\nu_3 + \nu_4$ | 11 2 9  | 11 3 8  | 2460.9996 | 1.35 | $0.23 \times 10^{-2}$  | $2\nu_9$        | 2 2 0   | 2 1 1   |
| 2457.6145 | 0.18 | $-0.53 \times 10^{-2}$ | $\nu_5 + \nu_7$ | 9 1 9   | 8 3 6   | 2461.0252 | 0.44 | $0.53 \times 10^{-2}$  | $\nu_5 + \nu_7$ | 8 1 7   | 7 3 4   |
| 2457.6382 | 0.44 | $0.18 \times 10^{-2}$  | $\nu_3 + \nu_4$ | 11 6 5  | 11 7 4  | 2461.1226 | 1.25 | $0.14 \times 10^{-2}$  | $\nu_5 + \nu_9$ | 11 10 1 | 12 11 1 |
| 2457.6489 | 0.73 | $-0.20 \times 10^{-2}$ | $2\nu_9$        | 13 11 2 | 13 0 13 | 2461.1226 | 1.25 | $0.14 \times 10^{-2}$  | $\nu_5 + \nu_9$ | 11 10 2 | 12 11 2 |
| 2457.6489 | 0.73 | $-0.22 \times 10^{-2}$ | $2\nu_9$        | 13 2 12 | 13 1 13 | 2461.2013 | 0.72 | $0.46 \times 10^{-2}$  | $\nu_5 + \nu_7$ | 10 0 10 | 9 2 7   |
| 2457.6835 | 0.55 | $0.18 \times 10^{-2}$  | $\nu_3 + \nu_4$ | 10 3 8  | 10 4 7  | 2461.2270 | 1.41 | $-0.39 \times 10^{-2}$ | $\nu_3 + \nu_4$ | 6 2 5   | 6 3 4   |
| 2457.7131 | 0.22 | $0.41 \times 10^{-3}$  | $\nu_3 + \nu_4$ | 4 0 4   | 4 3 1   | 2461.2597 | 0.19 | $-0.13 \times 10^{-2}$ | $\nu_5 + \nu_7$ | 4 3 2   | 3 1 3   |
| 2457.9313 | 0.52 | $-0.30 \times 10^{-4}$ | $\nu_5 + \nu_9$ | 13 5 8  | 14 6 8  | 2461.3366 | 0.29 | $0.24 \times 10^{-2}$  | $\nu_5 + \nu_7$ | 9 2 8   | 8 4 5   |
| 2457.9932 | 0.51 | $-0.42 \times 10^{-2}$ | $\nu_3 + \nu_4$ | 10 2 9  | 10 3 8  | 2461.4940 | 0.81 | $0.51 \times 10^{-2}$  | $\nu_3 + \nu_4$ | 6 1 6   | 6 2 5   |
| 2457.9932 | 0.51 | $0.50 \times 10^{-3}$  | $\nu_5 + \nu_9$ | 12 2 10 | 13 3 10 | 2461.5283 | 1.63 | $-0.12 \times 10^{-2}$ | $2\nu_9$        | 3 2 1   | 3 1 2   |
| 2458.0687 | 0.98 | $0.27 \times 10^{-2}$  | $\nu_3 + \nu_4$ | 6 4 2   | 6 5 1   | 2461.6106 | 0.91 | $-0.49 \times 10^{-2}$ | $\nu_3 + \nu_4$ | 7 1 6   | 7 2 5   |
| 2458.1057 | 0.51 | $-0.14 \times 10^{-2}$ | $\nu_3 + \nu_4$ | 10 1 9  | 10 2 8  | 2461.6106 | 0.91 | $0.31 \times 10^{-2}$  | $\nu_3 + \nu_4$ | 12 4 8  | 12 5 7  |
| 2458.1057 | 0.51 | $0.50 \times 10^{-3}$  | $\nu_3 + \nu_4$ | 12 3 9  | 12 4 8  | 2461.6532 | 0.60 | $0.22 \times 10^{-2}$  | $2\nu_9$        | 11 2 10 | 11 1 11 |
| 2458.1057 | 0.51 | $0.50 \times 10^{-4}$  | $\nu_5 + \nu_7$ | 8 3 6   | 7 5 3   | 2461.7776 | 1.13 | $0.37 \times 10^{-2}$  | $\nu_5 + \nu_9$ | 12 6 6  | 13 7 6  |
| 2458.2481 | 0.22 | $-0.57 \times 10^{-2}$ | $\nu_5 + \nu_7$ | 9 0 9   | 8 2 6   | 2461.7936 | 0.63 | $0.69 \times 10^{-2}$  | $\nu_3 + \nu_4$ | 6 0 6   | 6 1 5   |
| 2458.4115 | 0.56 | $0.16 \times 10^{-2}$  | $\nu_3 + \nu_4$ | 9 3 7   | 9 4 6   | 2461.7936 | 0.63 | $-0.22 \times 10^{-3}$ | $\nu_3 + \nu_4$ | 10 3 7  | 10 4 6  |
| 2458.5993 | 0.15 | $0.70 \times 10^{-3}$  | $\nu_5 + \nu_7$ | 4 3 1   | 3 1 2   | 2461.7936 | 0.63 | $0.60 \times 10^{-2}$  | $2\nu_9$        | 8 7 1   | 8 6 2   |
| 2458.6597 | 0.51 | $-0.41 \times 10^{-2}$ | $\nu_3 + \nu_4$ | 9 2 8   | 9 3 7   | 2461.7936 | 0.63 | $0.39 \times 10^{-2}$  | $2\nu_9$        | 8 7 2   | 8 6 3   |
| 2458.7660 | 0.92 | $-0.90 \times 10^{-4}$ | $\nu_3 + \nu_4$ | 9 5 4   | 9 6 3   | 2461.8495 | 1.05 | $0.68 \times 10^{-3}$  | $\nu_3 + \nu_4$ | 0 0 0   | 1 1 1   |
| 2458.7660 | 0.92 | $-0.56 \times 10^{-2}$ | $\nu_3 + \nu_4$ | 12 0 12 | 12 1 11 | 2461.9675 | 1.79 | $0.13 \times 10^{-2}$  | $\nu_3 + \nu_4$ | 5 3 2   | 5 4 1   |
| 2458.7660 | 0.92 | $0.66 \times 10^{-2}$  | $\nu_5 + \nu_9$ | 12 3 10 | 13 4 10 | 2461.9840 | 1.23 | $-0.32 \times 10^{-2}$ | $\nu_3 + \nu_4$ | 5 2 4   | 5 3 3   |
| 2458.7984 | 0.11 | $-0.10 \times 10^{-4}$ | $\nu_3 + \nu_4$ | 13 0 13 | 13 1 12 | 2461.9840 | 1.23 | $-0.13 \times 10^{-2}$ | $2\nu_9$        | 6 6 0   | 6 5 1   |
| 2458.8663 | 0.59 | $0.28 \times 10^{-2}$  | $\nu_3 + \nu_4$ | 10 2 8  | 10 3 7  | 2462.0201 | 0.63 | $-0.10 \times 10^{-2}$ | $2\nu_9$        | 2 2 1   | 2 1 2   |
| 2458.8663 | 0.59 | $0.23 \times 10^{-3}$  | $\nu_3 + \nu_4$ | 11 1 11 | 11 2 10 | 2462.1587 | 1.29 | $-0.12 \times 10^{-2}$ | $2\nu_9$        | 3 1 2   | 3 0 3   |

| (I)       | (II) | (III)                  | (IV)            | (V)     | (VI)    | (I)       | (II) | (III)                  | (IV)            | (V)     | (VI)    |
|-----------|------|------------------------|-----------------|---------|---------|-----------|------|------------------------|-----------------|---------|---------|
| 2462.2118 | 0.13 | $0.72 \times 10^{-3}$  | $\nu_5 + \nu_7$ | 5 2 3   | 4 0 4   | 2464.4942 | 1.44 | $0.82 \times 10^{-3}$  | $2\nu_9$        | 5 1 4   | 5 0 5   |
| 2462.2288 | 0.74 | $-0.40 \times 10^{-4}$ | $2\nu_9$        | 3 3 0   | 3 2 1   | 2464.5602 | 2.11 | $-0.44 \times 10^{-2}$ | $\nu_3 + \nu_4$ | 7 3 4   | 7 4 3   |
| 2462.2448 | 0.24 | $0.43 \times 10^{-3}$  | $\nu_5 + \nu_9$ | 12 5 8  | 13 6 8  | 2464.5738 | 0.73 | $0.15 \times 10^{-2}$  | $\nu_3 + \nu_4$ | 8 3 5   | 8 4 4   |
| 2462.3658 | 0.83 | $-0.62 \times 10^{-2}$ | $\nu_3 + \nu_4$ | 8 2 6   | 8 3 5   | 2464.5738 | 0.73 | $0.15 \times 10^{-2}$  | $2\nu_9$        | 8 5 3   | 8 4 4   |
| 2462.3658 | 0.83 | $0.32 \times 10^{-2}$  | $\nu_3 + \nu_4$ | 8 4 4   | 8 5 3   | 2464.5922 | 1.20 | $0.46 \times 10^{-2}$  | $\nu_5 + \nu_9$ | 9 4 5   | 10 7 3  |
| 2462.3739 | 0.67 | $0.19 \times 10^{-2}$  | $\nu_3 + \nu_4$ | 8 2 6   | 8 3 5   | 2464.5922 | 1.20 | $0.60 \times 10^{-2}$  | $\nu_5 + \nu_9$ | 11 1 10 | 12 2 10 |
| 2462.4561 | 0.82 | $0.35 \times 10^{-2}$  | $\nu_3 + \nu_4$ | 5 1 5   | 5 2 4   | 2464.5922 | 1.20 | $0.20 \times 10^{-2}$  | $2\nu_9$        | 5 2 4   | 5 1 5   |
| 2462.4883 | 1.98 | $-0.25 \times 10^{-2}$ | $\nu_3 + \nu_4$ | 4 2 3   | 4 3 2   | 2464.5922 | 1.20 | $0.25 \times 10^{-2}$  | $2\nu_9$        | 8 6 3   | 8 5 4   |
| 2462.5048 | 0.54 | $0.24 \times 10^{-2}$  | $\nu_5 + \nu_7$ | 8 2 6   | 7 4 3   | 2464.6487 | 0.72 | $-0.12 \times 10^{-3}$ | $\nu_3 + \nu_4$ | 4 0 4   | 4 1 3   |
| 2462.5229 | 1.56 | 0.00E+00               | $2\nu_9$        | 4 2 2   | 4 1 3   | 2464.8165 | 0.59 | $-0.30 \times 10^{-2}$ | $\nu_5 + \nu_9$ | 11 2 10 | 12 3 10 |
| 2462.5356 | 0.77 | $0.29 \times 10^{-2}$  | $\nu_5 + \nu_9$ | 8 5 3   | 9 8 1   | 2464.9458 | 1.21 | $0.66 \times 10^{-2}$  | $\nu_5 + \nu_9$ | 12 5 7  | 13 6 7  |
| 2462.5356 | 0.77 | $-0.13 \times 10^{-2}$ | $\nu_5 + \nu_9$ | 9 3 7   | 10 6 5  | 2464.9712 | 2.89 | $0.34 \times 10^{-2}$  | $2\nu_9$        | 6 4 3   | 6 3 4   |
| 2462.5691 | 1.25 | $0.13 \times 10^{-2}$  | $2\nu_9$        | 4 3 1   | 4 2 2   | 2464.9712 | 2.89 | $-0.21 \times 10^{-2}$ | $2\nu_9$        | 8 1 7   | 8 0 8   |
| 2462.5777 | 1.21 | $-0.35 \times 10^{-2}$ | $\nu_5 + \nu_9$ | 11 9 3  | 12 10 3 | 2465.0257 | 2.48 | $0.17 \times 10^{-2}$  | $\nu_3 + \nu_4$ | 4 2 2   | 4 3 1   |
| 2462.5777 | 1.21 | $-0.36 \times 10^{-2}$ | $\nu_5 + \nu_9$ | 11 9 2  | 12 10 2 | 2465.0257 | 2.48 | $-0.66 \times 10^{-2}$ | $\nu_3 + \nu_4$ | 5 1 4   | 5 2 3   |
| 2462.6347 | 0.40 | $0.24 \times 10^{-2}$  | $\nu_5 + \nu_9$ | 11 0 11 | 12 1 11 | 2465.0835 | 1.42 | $0.24 \times 10^{-2}$  | $\nu_3 + \nu_4$ | 2 1 2   | 2 2 1   |
| 2462.6613 | 0.62 | $0.54 \times 10^{-2}$  | $\nu_5 + \nu_7$ | 12 1 11 | 12 1 12 | 2465.0835 | 1.42 | $-0.48 \times 10^{-2}$ | $\nu_5 + \nu_7$ | 10 2 9  | 9 4 6   |
| 2462.6613 | 0.62 | $0.44 \times 10^{-2}$  | $\nu_5 + \nu_9$ | 11 1 11 | 12 2 11 | 2465.0935 | 2.22 | $0.52 \times 10^{-2}$  | $\nu_5 + \nu_7$ | 10 2 9  | 9 4 6   |
| 2462.6886 | 1.05 | $0.10 \times 10^{-2}$  | $\nu_3 + \nu_4$ | 3 2 2   | 3 3 1   | 2465.0935 | 2.22 | $-0.34 \times 10^{-2}$ | $2\nu_9$        | 6 2 4   | 6 1 5   |
| 2462.7591 | 0.43 | $0.50 \times 10^{-4}$  | $2\nu_9$        | 3 3 1   | 3 2 2   | 2465.0935 | 2.22 | $0.89 \times 10^{-3}$  | $2\nu_9$        | 6 1 5   | 6 0 6   |
| 2462.8692 | 0.64 | $0.52 \times 10^{-3}$  | $2\nu_9$        | 3 2 2   | 3 1 3   | 2465.1174 | 1.35 | $-0.16 \times 10^{-3}$ | $2\nu_9$        | 6 2 5   | 6 1 6   |
| 2462.9292 | 1.34 | $-0.35 \times 10^{-2}$ | $\nu_5 + \nu_7$ | 6 3 3   | 5 3 2   | 2465.2052 | 2.10 | $-0.50 \times 10^{-2}$ | $2\nu_9$        | 11 2 9  | 11 1 10 |
| 2462.9481 | 0.12 | $-0.80 \times 10^{-3}$ | $2\nu_9$        | 5 5 0   | 5 4 1   | 2465.2052 | 2.10 | $0.20 \times 10^{-2}$  | $2\nu_9$        | 11 3 9  | 11 2 10 |
| 2462.9849 | 0.10 | $-0.86 \times 10^{-3}$ | $2\nu_9$        | 5 5 1   | 5 4 2   | 2465.2552 | 1.92 | $0.79 \times 10^{-3}$  | $2\nu_9$        | 7 1 6   | 7 0 7   |
| 2463.0347 | 0.33 | $-0.52 \times 10^{-3}$ | $2\nu_9$        | 4 4 0   | 4 3 1   | 2465.3400 | 2.23 | $0.20 \times 10^{-2}$  | $\nu_3 + \nu_4$ | 6 2 4   | 6 3 3   |
| 2463.1426 | 1.59 | $0.16 \times 10^{-3}$  | $2\nu_9$        | 10 2 9  | 10 1 10 | 2465.3400 | 2.23 | $-0.20 \times 10^{-2}$ | $2\nu_9$        | 6 3 4   | 6 2 5   |
| 2463.2099 | 1.02 | $0.56 \times 10^{-2}$  | $\nu_3 + \nu_4$ | 11 4 7  | 11 5 6  | 2465.4268 | 0.99 | $0.50 \times 10^{-2}$  | $2\nu_9$        | 7 4 3   | 7 3 4   |
| 2463.2099 | 1.02 | $-0.28 \times 10^{-2}$ | $\nu_5 + \nu_7$ | 6 3 4   | 5 3 3   | 2465.6089 | 0.75 | $-0.26 \times 10^{-2}$ | $\nu_5 + \nu_7$ | 7 0 7   | 6 0 6   |
| 2463.2099 | 1.02 | $0.35 \times 10^{-2}$  | $2\nu_9$        | 4 4 1   | 4 3 2   | 2465.6469 | 1.97 | $0.55 \times 10^{-3}$  | $\nu_3 + \nu_4$ | 5 2 3   | 5 3 2   |
| 2463.2202 | 0.79 | $-0.15 \times 10^{-2}$ | $\nu_5 + \nu_7$ | 13 11 3 | 13 9 4  | 2465.6700 | 0.96 | $-0.37 \times 10^{-2}$ | $\nu_5 + \nu_7$ | 7 1 7   | 6 1 6   |
| 2463.2612 | 0.12 | $0.20 \times 10^{-2}$  | $2\nu_9$        | 15 3 12 | 15 2 13 | 2465.6908 | 0.98 | $-0.14 \times 10^{-2}$ | $\nu_5 + \nu_9$ | 11 7 5  | 12 8 5  |
| 2463.3150 | 0.26 | $-0.43 \times 10^{-2}$ | $\nu_3 + \nu_4$ | 11 5 6  | 11 6 5  | 2465.7811 | 0.66 | $0.17 \times 10^{-3}$  | $\nu_5 + \nu_9$ | 11 7 4  | 12 8 4  |
| 2463.3435 | 2.54 | $0.17 \times 10^{-2}$  | $\nu_3 + \nu_4$ | 6 1 5   | 6 2 4   | 2465.8420 | 1.84 | $-0.14 \times 10^{-2}$ | $2\nu_9$        | 7 3 4   | 7 2 5   |
| 2463.3435 | 2.54 | $0.15 \times 10^{-2}$  | $2\nu_9$        | 5 3 2   | 5 2 3   | 2465.9159 | 0.45 | $-0.15 \times 10^{-3}$ | $2\nu_9$        | 1 1 1   | 0 0 0   |
| 2463.3435 | 2.54 | $-0.19 \times 10^{-2}$ | $2\nu_9$        | 7 6 1   | 7 5 2   | 2466.0035 | 0.23 | $-0.25 \times 10^{-2}$ | $\nu_5 + \nu_7$ | 14 9 6  | 14 7 7  |
| 2463.3626 | 0.18 | $-0.23 \times 10^{-2}$ | $2\nu_9$        | 9 7 2   | 9 6 3   | 2466.0345 | 2.28 | $-0.47 \times 10^{-2}$ | $2\nu_9$        | 7 2 5   | 7 1 6   |
| 2463.3626 | 0.18 | $-0.29 \times 10^{-3}$ | $2\nu_9$        | 9 7 3   | 9 6 4   | 2466.0510 | 0.91 | $0.30 \times 10^{-2}$  | $2\nu_9$        | 7 4 4   | 7 3 5   |
| 2463.4357 | 1.91 | $0.47 \times 10^{-2}$  | $\nu_3 + \nu_4$ | 4 1 4   | 4 2 3   | 2466.0510 | 0.91 | $0.37 \times 10^{-2}$  | $2\nu_9$        | 9 6 3   | 9 5 4   |
| 2463.4779 | 1.00 | $0.90 \times 10^{-4}$  | $2\nu_9$        | 4 1 3   | 4 0 4   | 2466.0850 | 2.74 | $0.20 \times 10^{-2}$  | $\nu_5 + \nu_7$ | 9 3 6   | 8 5 3   |
| 2463.4991 | 0.61 | $0.41 \times 10^{-2}$  | $\nu_3 + \nu_4$ | 9 3 6   | 9 4 5   | 2466.0850 | 2.74 | $-0.11 \times 10^{-2}$ | $2\nu_9$        | 10 3 8  | 10 2 9  |
| 2463.4991 | 0.61 | $0.41 \times 10^{-2}$  | $2\nu_9$        | 9 5 4   | 9 4 5   | 2466.1024 | 1.47 | $0.69 \times 10^{-2}$  | $2\nu_9$        | 10 2 8  | 10 1 9  |
| 2463.5246 | 0.22 | $-0.31 \times 10^{-2}$ | $2\nu_9$        | 4 3 2   | 4 2 3   | 2466.1024 | 1.47 | $-0.52 \times 10^{-3}$ | $2\nu_9$        | 9 6 4   | 9 5 5   |
| 2463.5518 | 1.95 | $-0.69 \times 10^{-2}$ | $\nu_3 + \nu_4$ | 6 3 3   | 6 4 2   | 2466.1490 | 1.12 | $0.51 \times 10^{-2}$  | $\nu_5 + \nu_7$ | 7 1 6   | 6 1 5   |
| 2463.5518 | 1.95 | $0.42 \times 10^{-3}$  | $2\nu_9$        | 5 4 1   | 5 3 2   | 2466.1490 | 1.12 | $-0.34 \times 10^{-2}$ | $\nu_5 + \nu_7$ | 15 14 2 | 15 12 3 |
| 2463.7865 | 1.70 | $0.65 \times 10^{-3}$  | $2\nu_9$        | 4 2 3   | 4 1 4   | 2466.1855 | 1.22 | $0.40 \times 10^{-4}$  | $\nu_3 + \nu_4$ | 3 0 3   | 3 1 2   |
| 2463.8216 | 2.22 | $0.38 \times 10^{-2}$  | $\nu_3 + \nu_4$ | 9 4 5   | 9 5 4   | 2466.2851 | 1.47 | $-0.22 \times 10^{-2}$ | $\nu_3 + \nu_4$ | 4 1 3   | 4 2 2   |
| 2463.8216 | 2.22 | $-0.58 \times 10^{-2}$ | $2\nu_9$        | 5 2 3   | 5 1 4   | 2466.3038 | 1.48 | $0.82 \times 10^{-3}$  | $\nu_5 + \nu_7$ | 7 2 5   | 6 2 4   |
| 2463.8529 | 0.12 | $-0.78 \times 10^{-3}$ | $\nu_3 + \nu_4$ | 12 5 7  | 12 6 6  | 2466.3303 | 0.12 | $0.47 \times 10^{-2}$  | $\nu_5 + \nu_7$ | 4 4 0   | 3 2 1   |
| 2463.8529 | 0.12 | $-0.78 \times 10^{-3}$ | $\nu_5 + \nu_7$ | 12 8 5  | 12 6 6  | 2466.3880 | 1.24 | $0.17 \times 10^{-2}$  | $\nu_5 + \nu_7$ | 6 4 2   | 5 4 1   |
| 2463.8529 | 0.12 | $-0.29 \times 10^{-2}$ | $2\nu_9$        | 6 5 1   | 6 4 2   | 2466.3995 | 1.15 | $0.20 \times 10^{-2}$  | $2\nu_9$        | 8 5 4   | 8 4 5   |
| 2463.9071 | 0.84 | $-0.29 \times 10^{-2}$ | $\nu_5 + \nu_9$ | 12 4 8  | 13 5 8  | 2466.3995 | 1.15 | $0.39 \times 10^{-2}$  | $2\nu_9$        | 13 4 10 | 13 3 11 |
| 2463.9370 | 1.79 | $0.50 \times 10^{-2}$  | $2\nu_9$        | 12 2 10 | 12 1 11 | 2466.4631 | 0.86 | $0.53 \times 10^{-3}$  | $\nu_5 + \nu_9$ | 11 3 9  | 12 4 9  |
| 2463.9536 | 1.48 | $0.16 \times 10^{-2}$  | $\nu_3 + \nu_4$ | 3 2 1   | 3 3 0   | 2466.4907 | 0.65 | $0.14 \times 10^{-2}$  | $\nu_5 + \nu_9$ | 11 2 9  | 12 3 9  |
| 2463.9536 | 1.48 | $-0.94 \times 10^{-3}$ | $2\nu_9$        | 6 5 2   | 6 4 3   | 2466.5346 | 3.23 | $0.37 \times 10^{-2}$  | $2\nu_9$        | 8 2 6   | 8 1 7   |
| 2463.9869 | 0.45 | $-0.43 \times 10^{-2}$ | $2\nu_9$        | 5 4 2   | 5 3 3   | 2466.5346 | 3.23 | $-0.85 \times 10^{-3}$ | $2\nu_9$        | 8 3 6   | 8 2 7   |
| 2463.9938 | 0.42 | $0.26 \times 10^{-2}$  | $2\nu_9$        | 5 4 2   | 5 3 3   | 2466.5841 | 1.44 | $0.57 \times 10^{-3}$  | $\nu_3 + \nu_4$ | 2 1 1   | 2 2 0   |
| 2464.0960 | 2.06 | $0.42 \times 10^{-3}$  | $\nu_3 + \nu_4$ | 7 2 5   | 7 3 4   | 2466.7758 | 0.92 | $0.40 \times 10^{-2}$  | $2\nu_9$        | 8 4 4   | 8 3 5   |
| 2464.0960 | 2.06 | $0.58 \times 10^{-2}$  | $\nu_3 + \nu_4$ | 10 4 6  | 10 5 5  | 2466.8006 | 2.46 | $-0.97 \times 10^{-3}$ | $\nu_3 + \nu_4$ | 3 1 2   | 3 2 1   |
| 2464.0960 | 2.06 | $-0.27 \times 10^{-2}$ | $\nu_5 + \nu_9$ | 11 8 4  | 12 9 4  | 2466.9809 | 1.26 | $0.11 \times 10^{-2}$  | $\nu_5 + \nu_7$ | 4 4 1   | 3 2 2   |
| 2464.1384 | 0.13 | $0.28 \times 10^{-2}$  | $\nu_5 + \nu_7$ | 11 1 11 | 10 3 8  | 2466.9809 | 1.26 | $-0.56 \times 10^{-2}$ | $\nu_5 + \nu_7$ | 10 1 9  | 9 3 6   |
| 2464.2113 | 0.32 | $0.53 \times 10^{-2}$  | $\nu_5 + \nu_7$ | 9 1 8   | 8 3 5   | 2466.9809 | 1.26 | $0.27 \times 10^{-3}$  | $\nu_5 + \nu_7$ | 7 2 6   | 6 2 5   |
| 2464.2585 | 1.97 | $-0.36 \times 10^{-2}$ | $2\nu_9$        | 9 1 8   | 9 0 9   | 2467.0581 | 1.43 | $-0.28 \times 10^{-2}$ | $2\nu_9$        | 8 3 5   | 8 2 6   |
| 2464.2585 | 1.97 | $0.48 \times 10^{-3}$  | $2\nu_9$        | 9 2 8   | 9 1 9   | 2467.0758 | 1.42 | $0.33 \times 10^{-3}$  | $2\nu_9$        | 8 4 5   | 8 3 6   |
| 2464.2960 | 0.90 | $0.20 \times 10^{-2}$  | $2\nu_9$        | 6 4 2   | 6 3 3   | 2467.1528 | 0.90 | $-0.43 \times 10^{-2}$ | $\nu_5 + \nu_9$ | 11 6 6  | 12 7 6  |
| 2464.3172 | 0.13 | $-0.11 \times 10^{-2}$ | $\nu_5 + \nu_7$ | 5 3 2   | 4 1 3   | 2467.3241 | 0.13 | $-0.24 \times 10^{-2}$ | $\nu_5 + \nu_7$ | 12 1 12 | 11 3 9  |
| 2464.3764 | 1.99 | $0.21 \times 10^{-2}$  | $\nu_3 + \nu_4$ | 3 1 3   | 3 2 2   | 2467.3932 | 1.41 | $0.20 \times 10^{-4}$  | $\nu_3 + \nu_4$ | 2 0 2   | 2 1 1   |
| 2464.4136 | 0.95 | $-0.34 \times 10^{-3}$ | $2\nu_9$        | 5 3 3   | 5 2 4   | 2467.4468 | 1.27 | $0.17 \times 10^{-2}$  | $2\nu_9$        | 12 4 9  | 12 3 10 |

| (I)       | (II) | (III)                  | (IV)            | (V)     | (VI)    | (I)       | (II) | (III)                  | (IV)            | (V)     | (VI)    |
|-----------|------|------------------------|-----------------|---------|---------|-----------|------|------------------------|-----------------|---------|---------|
| 2467.4600 | 0.89 | $-0.50 \times 10^{-3}$ | $2\nu_9$        | 12 3 9  | 12 2 10 | 2472.2370 | 2.99 | $0.54 \times 10^{-3}$  | $\nu_3 + \nu_4$ | 6 5 2   | 6 4 3   |
| 2467.5719 | 0.51 | $0.25 \times 10^{-2}$  | $\nu_5 + \nu_7$ | 9 2 7   | 8 4 4   | 2472.2538 | 0.87 | $0.33 \times 10^{-2}$  | $\nu_5 + \nu_9$ | 13 6 7  | 14 5 9  |
| 2467.6192 | 0.29 | $-0.50 \times 10^{-4}$ | $\nu_5 + \nu_7$ | 10 3 8  | 9 5 5   | 2472.3887 | 0.45 | $0.26 \times 10^{-2}$  | $\nu_5 + \nu_9$ | 14 6 9  | 15 5 11 |
| 2467.8522 | 1.42 | $-0.15 \times 10^{-2}$ | $2\nu_9$        | 9 4 6   | 9 3 7   | 2472.4117 | 1.35 | $0.16 \times 10^{-2}$  | $\nu_3 + \nu_4$ | 3 2 2   | 3 1 3   |
| 2467.9018 | 2.15 | $-0.60 \times 10^{-2}$ | $2\nu_9$        | 9 3 6   | 9 2 7   | 2472.4338 | 1.43 | $0.49 \times 10^{-2}$  | $\nu_5 + \nu_7$ | 8 1 7   | 7 1 6   |
| 2467.9304 | 1.77 | $0.46 \times 10^{-2}$  | $\nu_5 + \nu_9$ | 10 10 0 | 11 11 0 | 2472.4569 | 4.38 | $0.16 \times 10^{-2}$  | $\nu_3 + \nu_4$ | 6 4 2   | 6 3 3   |
| 2467.9304 | 1.77 | $0.47 \times 10^{-2}$  | $\nu_5 + \nu_9$ | 10 10 1 | 11 11 1 | 2472.4569 | 4.38 | $-0.59 \times 10^{-3}$ | $\nu_5 + \nu_7$ | 12 3 9  | 11 3 8  |
| 2467.9605 | 1.17 | $0.66 \times 10^{-2}$  | $\nu_5 + \nu_9$ | 11 6 5  | 12 7 5  | 2472.5082 | 1.04 | $-0.72 \times 10^{-3}$ | $\nu_5 + \nu_9$ | 10 7 4  | 11 8 4  |
| 2467.9989 | 0.94 | $-0.61 \times 10^{-2}$ | $\nu_5 + \nu_9$ | 11 4 8  | 12 5 8  | 2472.5246 | 2.53 | $-0.31 \times 10^{-3}$ | $\nu_3 + \nu_4$ | 6 6 1   | 6 5 2   |
| 2468.0265 | 2.10 | $0.13 \times 10^{-3}$  | $\nu_3 + \nu_4$ | 1 0 1   | 1 1 0   | 2472.5246 | 2.53 | $0.50 \times 10^{-2}$  | $\nu_3 + \nu_4$ | 6 6 0   | 6 5 1   |
| 2468.0717 | 1.15 | $0.25 \times 10^{-2}$  | $2\nu_9$        | 11 4 8  | 11 3 9  | 2472.5246 | 2.53 | $-0.69 \times 10^{-2}$ | $\nu_5 + \nu_9$ | 10 7 3  | 11 8 3  |
| 2468.0977 | 1.52 | $-0.45 \times 10^{-2}$ | $2\nu_9$        | 11 3 8  | 11 2 9  | 2472.7726 | 3.51 | $0.24 \times 10^{-2}$  | $\nu_3 + \nu_4$ | 6 4 3   | 6 3 4   |
| 2468.1678 | 1.18 | $0.20 \times 10^{-3}$  | $2\nu_9$        | 9 4 5   | 9 3 6   | 2472.9979 | 0.73 | $0.11 \times 10^{-2}$  | $\nu_5 + \nu_7$ | 8 2 7   | 7 2 6   |
| 2468.1941 | 1.27 | $-0.41 \times 10^{-2}$ | $\nu_5 + \nu_7$ | 7 3 4   | 6 3 3   | 2473.0383 | 2.72 | $0.15 \times 10^{-2}$  | $\nu_3 + \nu_4$ | 5 3 3   | 5 2 4   |
| 2468.2114 | 1.59 | $0.58 \times 10^{-3}$  | $2\nu_9$        | 10 4 7  | 10 3 8  | 2473.0383 | 2.72 | $0.39 \times 10^{-2}$  | $\nu_5 + \nu_9$ | 10 1 9  | 11 2 9  |
| 2468.2570 | 1.55 | $-0.62 \times 10^{-2}$ | $2\nu_9$        | 10 3 7  | 10 2 8  | 2473.0578 | 0.24 | $0.18 \times 10^{-2}$  | $\nu_5 + \nu_7$ | 14 1 13 | 14 1 14 |
| 2468.5113 | 0.10 | $-0.19 \times 10^{-2}$ | $\nu_5 + \nu_7$ | 5 3 3   | 4 1 4   | 2473.0766 | 0.71 | $0.37 \times 10^{-2}$  | $\nu_5 + \nu_9$ | 10 2 9  | 11 3 9  |
| 2468.5894 | 0.23 | $0.13 \times 10^{-3}$  | $\nu_5 + \nu_7$ | 11 2 10 | 10 4 7  | 2473.0766 | 0.71 | $-0.41 \times 10^{-2}$ | $2\nu_9$        | 5 5 0   | 5 2 3   |
| 2468.7978 | 0.57 | $-0.27 \times 10^{-2}$ | $\nu_5 + \nu_9$ | 7 5 3   | 8 8 1   | 2473.2055 | 0.22 | $0.44 \times 10^{-2}$  | $\nu_5 + \nu_7$ | 5 4 2   | 4 2 3   |
| 2468.9155 | 1.47 | $-0.39 \times 10^{-2}$ | $\nu_5 + \nu_7$ | 7 3 5   | 6 3 4   | 2473.3107 | 1.77 | $-0.41 \times 10^{-2}$ | $\nu_5 + \nu_7$ | 8 3 5   | 7 3 4   |
| 2469.0525 | 0.41 | $-0.39 \times 10^{-2}$ | $2\nu_9$        | 10 4 6  | 10 3 7  | 2473.4681 | 3.28 | $-0.68 \times 10^{-3}$ | $\nu_3 + \nu_4$ | 8 6 3   | 8 5 4   |
| 2469.3412 | 0.75 | $-0.59 \times 10^{-2}$ | $\nu_5 + \nu_9$ | 11 3 8  | 12 4 8  | 2473.5241 | 2.93 | $0.23 \times 10^{-2}$  | $\nu_3 + \nu_4$ | 7 7 1   | 7 6 2   |
| 2469.4059 | 1.78 | $-0.15 \times 10^{-2}$ | $\nu_5 + \nu_9$ | 10 9 2  | 11 10 2 | 2473.5241 | 2.93 | $0.30 \times 10^{-2}$  | $\nu_3 + \nu_4$ | 7 7 0   | 7 6 1   |
| 2469.4059 | 1.78 | $-0.16 \times 10^{-2}$ | $\nu_5 + \nu_9$ | 10 9 1  | 11 10 1 | 2473.5362 | 2.53 | $-0.19 \times 10^{-2}$ | $\nu_3 + \nu_4$ | 8 6 2   | 8 5 3   |
| 2469.5009 | 1.33 | $-0.58 \times 10^{-2}$ | $\nu_5 + \nu_7$ | 9 8 2   | 9 6 3   | 2473.5569 | 4.94 | $0.31 \times 10^{-3}$  | $\nu_3 + \nu_4$ | 4 1 3   | 4 0 4   |
| 2469.8408 | 0.79 | $0.37 \times 10^{-2}$  | $2\nu_9$        | 4 3 1   | 4 0 4   | 2473.5569 | 4.94 | $-0.82 \times 10^{-3}$ | $\nu_3 + \nu_4$ | 7 4 3   | 7 3 4   |
| 2470.1282 | 2.64 | $0.16 \times 10^{-2}$  | $\nu_3 + \nu_4$ | 1 1 0   | 1 0 1   | 2473.8646 | 2.95 | $-0.93 \times 10^{-3}$ | $\nu_3 + \nu_4$ | 8 7 1   | 8 6 2   |
| 2470.3617 | 0.34 | $0.16 \times 10^{-2}$  | $\nu_5 + \nu_7$ | 6 5 2   | 5 5 1   | 2473.8646 | 2.95 | $0.15 \times 10^{-2}$  | $\nu_3 + \nu_4$ | 8 7 2   | 8 6 3   |
| 2470.3617 | 0.34 | $0.24 \times 10^{-2}$  | $\nu_5 + \nu_7$ | 6 5 1   | 5 5 0   | 2474.0654 | 5.35 | $-0.43 \times 10^{-2}$ | $\nu_3 + \nu_4$ | 8 5 3   | 8 4 4   |
| 2470.4343 | 1.95 | $0.86 \times 10^{-3}$  | $\nu_3 + \nu_4$ | 2 2 0   | 2 1 1   | 2474.0870 | 1.07 | $-0.94 \times 10^{-3}$ | $\nu_5 + \nu_9$ | 10 6 5  | 11 7 5  |
| 2470.4922 | 0.11 | $0.11 \times 10^{-3}$  | $\nu_5 + \nu_7$ | 6 2 4   | 5 0 5   | 2474.1478 | 2.45 | $-0.30 \times 10^{-3}$ | $\nu_3 + \nu_4$ | 6 3 4   | 6 2 5   |
| 2470.5087 | 0.17 | $-0.20 \times 10^{-2}$ | $\nu_5 + \nu_7$ | 13 0 13 | 12 2 10 | 2474.1902 | 3.02 | $-0.26 \times 10^{-3}$ | $\nu_3 + \nu_4$ | 9 6 4   | 9 5 5   |
| 2470.7975 | 0.39 | $0.27 \times 10^{-3}$  | $2\nu_9$        | 2 0 2   | 1 1 1   | 2474.1999 | 2.74 | $-0.50 \times 10^{-2}$ | $\nu_3 + \nu_4$ | 7 3 4   | 7 2 5   |
| 2470.8522 | 2.73 | $0.26 \times 10^{-3}$  | $\nu_3 + \nu_4$ | 3 3 0   | 3 2 1   | 2474.2194 | 0.67 | $-0.90 \times 10^{-3}$ | $2\nu_9$        | 2 2 1   | 1 1 0   |
| 2470.9220 | 1.95 | $-0.39 \times 10^{-2}$ | $\nu_5 + \nu_9$ | 10 8 3  | 11 9 3  | 2474.2794 | 0.10 | $-0.49 \times 10^{-2}$ | $2\nu_9$        | 4 4 1   | 4 1 4   |
| 2470.9220 | 1.95 | $-0.49 \times 10^{-2}$ | $\nu_5 + \nu_9$ | 10 8 2  | 11 9 2  | 2474.3287 | 2.05 | $0.70 \times 10^{-3}$  | $\nu_3 + \nu_4$ | 6 2 4   | 6 1 5   |
| 2470.9762 | 1.95 | $0.42 \times 10^{-3}$  | $\nu_3 + \nu_4$ | 2 1 1   | 2 0 2   | 2474.3569 | 1.65 | $-0.29 \times 10^{-3}$ | $\nu_3 + \nu_4$ | 9 7 3   | 9 6 4   |
| 2471.0051 | 3.69 | $0.51 \times 10^{-3}$  | $\nu_3 + \nu_4$ | 3 2 1   | 3 1 2   | 2474.3946 | 2.81 | $-0.32 \times 10^{-2}$ | $\nu_3 + \nu_4$ | 9 7 2   | 9 6 3   |
| 2471.0860 | 0.10 | $-0.15 \times 10^{-2}$ | $\nu_5 + \nu_9$ | 8 3 6   | 9 6 4   | 2474.3946 | 2.81 | $0.63 \times 10^{-2}$  | $\nu_5 + \nu_9$ | 10 6 4  | 11 7 4  |
| 2471.2459 | 1.80 | $-0.65 \times 10^{-3}$ | $\nu_3 + \nu_4$ | 4 4 0   | 4 3 1   | 2474.3946 | 2.81 | $-0.32 \times 10^{-2}$ | $2\nu_9$        | 9 9 0   | 9 6 3   |
| 2471.2791 | 3.41 | $0.19 \times 10^{-2}$  | $\nu_3 + \nu_4$ | 4 3 1   | 4 2 2   | 2474.4792 | 0.14 | $-0.38 \times 10^{-2}$ | $\nu_5 + \nu_9$ | 7 4 4   | 8 7 2   |
| 2471.3446 | 2.17 | $-0.23 \times 10^{-3}$ | $\nu_3 + \nu_4$ | 3 3 1   | 3 2 2   | 2474.5113 | 0.38 | $-0.39 \times 10^{-2}$ | $\nu_5 + \nu_9$ | 14 4 10 | 15 3 12 |
| 2471.3446 | 2.17 | $0.53 \times 10^{-2}$  | $\nu_5 + \nu_9$ | 11 5 6  | 12 6 6  | 2474.6121 | 0.91 | $-0.30 \times 10^{-2}$ | $\nu_5 + \nu_7$ | 8 3 6   | 7 3 5   |
| 2471.3947 | 2.13 | $-0.10 \times 10^{-2}$ | $\nu_3 + \nu_4$ | 4 4 1   | 4 3 2   | 2474.6277 | 2.48 | $0.12 \times 10^{-2}$  | $\nu_3 + \nu_4$ | 9 5 5   | 9 4 6   |
| 2471.4268 | 0.64 | $0.21 \times 10^{-2}$  | $\nu_5 + \nu_9$ | 10 0 10 | 11 1 10 | 2474.7087 | 1.00 | $-0.32 \times 10^{-2}$ | $\nu_5 + \nu_9$ | 10 3 8  | 11 4 8  |
| 2471.4268 | 0.64 | $0.30 \times 10^{-2}$  | $\nu_5 + \nu_9$ | 14 5 9  | 15 4 11 | 2474.7586 | 4.45 | $0.15 \times 10^{-2}$  | $\nu_3 + \nu_4$ | 8 4 4   | 8 3 5   |
| 2471.4495 | 1.51 | $0.15 \times 10^{-2}$  | $\nu_3 + \nu_4$ | 2 2 1   | 2 1 2   | 2474.7909 | 2.46 | $0.78 \times 10^{-3}$  | $\nu_3 + \nu_4$ | 8 4 5   | 8 3 6   |
| 2471.4495 | 1.51 | $-0.50 \times 10^{-2}$ | $\nu_5 + \nu_9$ | 10 1 10 | 11 2 10 | 2474.7909 | 2.46 | $-0.54 \times 10^{-3}$ | $\nu_5 + \nu_7$ | 11 9 3  | 11 7 4  |
| 2471.5567 | 0.27 | $-0.28 \times 10^{-2}$ | $\nu_5 + \nu_9$ | 14 8 6  | 15 7 8  | 2474.8117 | 1.25 | $-0.16 \times 10^{-2}$ | $\nu_5 + \nu_9$ | 15 1 14 | 16 0 16 |
| 2471.5666 | 0.21 | $0.17 \times 10^{-2}$  | $\nu_5 + \nu_7$ | 5 4 1   | 4 2 2   | 2474.8117 | 1.25 | $-0.34 \times 10^{-2}$ | $\nu_5 + \nu_9$ | 15 2 14 | 16 1 16 |
| 2471.7431 | 2.01 | $-0.99 \times 10^{-3}$ | $\nu_3 + \nu_4$ | 5 5 0   | 5 4 1   | 2474.8455 | 0.25 | $0.39 \times 10^{-2}$  | $\nu_5 + \nu_9$ | 13 7 6  | 14 6 8  |
| 2471.7747 | 1.45 | $-0.10 \times 10^{-2}$ | $\nu_3 + \nu_4$ | 5 5 1   | 5 4 2   | 2474.8693 | 0.91 | $-0.32 \times 10^{-2}$ | $\nu_3 + \nu_4$ | 5 2 4   | 5 1 5   |
| 2471.7983 | 0.85 | $-0.37 \times 10^{-2}$ | $\nu_5 + \nu_7$ | 8 0 8   | 7 0 7   | 2474.8995 | 1.29 | $-0.46 \times 10^{-2}$ | $\nu_3 + \nu_4$ | 5 1 4   | 5 0 5   |
| 2471.7983 | 0.85 | $-0.40 \times 10^{-2}$ | $\nu_5 + \nu_7$ | 10 2 8  | 9 4 5   | 2474.9452 | 2.30 | $0.53 \times 10^{-2}$  | $\nu_3 + \nu_4$ | 9 8 1   | 9 7 2   |
| 2471.8087 | 0.88 | $-0.20 \times 10^{-2}$ | $\nu_5 + \nu_7$ | 11 3 9  | 10 5 6  | 2474.9452 | 2.30 | $0.69 \times 10^{-2}$  | $\nu_3 + \nu_4$ | 9 8 2   | 9 7 3   |
| 2471.8218 | 0.72 | $0.14 \times 10^{-2}$  | $2\nu_9$        | 2 1 2   | 1 0 1   | 2474.9991 | 3.04 | $0.15 \times 10^{-2}$  | $\nu_3 + \nu_4$ | 10 6 5  | 10 5 6  |
| 2471.8424 | 0.65 | $-0.18 \times 10^{-2}$ | $\nu_5 + \nu_7$ | 7 4 3   | 6 4 2   | 2475.0151 | 2.22 | $0.19 \times 10^{-2}$  | $\nu_3 + \nu_4$ | 10 7 4  | 10 6 5  |
| 2471.9241 | 0.55 | $-0.13 \times 10^{-2}$ | $\nu_5 + \nu_7$ | 12 2 11 | 11 4 8  | 2475.0151 | 2.22 | $-0.42 \times 10^{-2}$ | $2\nu_9$        | 2 2 0   | 1 1 1   |
| 2471.9241 | 0.55 | $-0.39 \times 10^{-2}$ | $\nu_5 + \nu_7$ | 10 3 7  | 9 5 4   | 2475.1082 | 1.19 | $-0.39 \times 10^{-2}$ | $\nu_5 + \nu_9$ | 10 2 8  | 11 3 8  |
| 2471.9769 | 2.69 | $0.16 \times 10^{-2}$  | $\nu_3 + \nu_4$ | 5 4 2   | 5 3 3   | 2475.2461 | 2.25 | $-0.21 \times 10^{-2}$ | $\nu_3 + \nu_4$ | 10 7 3  | 10 6 4  |
| 2471.9769 | 2.69 | $-0.39 \times 10^{-2}$ | $\nu_5 + \nu_7$ | 7 4 4   | 6 4 3   | 2475.2541 | 2.16 | $0.51 \times 10^{-3}$  | $\nu_3 + \nu_4$ | 8 3 5   | 8 2 6   |
| 2472.0143 | 0.86 | $-0.19 \times 10^{-2}$ | $\nu_5 + \nu_9$ | 11 4 7  | 12 5 7  | 2475.2541 | 2.16 | $0.59 \times 10^{-2}$  | $\nu_3 + \nu_4$ | 10 7 3  | 10 6 4  |
| 2472.0836 | 3.64 | $0.17 \times 10^{-2}$  | $\nu_3 + \nu_4$ | 4 3 2   | 4 2 3   | 2475.2541 | 2.16 | $-0.20 \times 10^{-2}$ | $\nu_5 + \nu_7$ | 11 2 9  | 10 4 6  |
| 2472.0984 | 4.80 | $0.37 \times 10^{-3}$  | $\nu_3 + \nu_4$ | 5 3 2   | 5 2 3   | 2475.2541 | 2.16 | $0.51 \times 10^{-3}$  | $2\nu_9$        | 8 5 3   | 8 2 6   |
| 2472.1444 | 1.89 | $0.16 \times 10^{-2}$  | $\nu_5 + \nu_7$ | 8 2 6   | 7 2 5   | 2475.3847 | 1.75 | $0.10 \times 10^{-2}$  | $\nu_3 + \nu_4$ | 10 8 3  | 10 7 4  |
| 2472.1710 | 2.37 | $0.39 \times 10^{-3}$  | $\nu_3 + \nu_4$ | 6 5 1   | 6 4 2   | 2475.3996 | 2.21 | $0.62 \times 10^{-3}$  | $\nu_3 + \nu_4$ | 7 3 5   | 7 2 6   |
| 2472.2093 | 2.38 | $-0.91 \times 10^{-3}$ | $\nu_3 + \nu_4$ | 3 1 2   | 3 0 3   | 2475.3996 | 2.21 | $-0.15 \times 10^{-2}$ | $\nu_3 + \nu_4$ | 10 8 2  | 10 7 3  |

| (I)       | (II) | (III)                  | (IV)            | (V)     | (VI)    | (I)       | (II) | (III)                  | (IV)            | (V)     | (VI)    |
|-----------|------|------------------------|-----------------|---------|---------|-----------|------|------------------------|-----------------|---------|---------|
| 2475.4672 | 4.13 | $-0.19 \times 10^{-2}$ | $\nu_3 + \nu_4$ | 9 5 4   | 9 4 5   | 2478.3107 | 0.07 | $-0.12 \times 10^{-2}$ | $\nu_5 + \nu_7$ | 15 13 3 | 15 11 4 |
| 2475.5052 | 1.79 | $0.58 \times 10^{-3}$  | $\nu_3 + \nu_4$ | 7 2 5   | 7 1 6   | 2478.4176 | 0.73 | $0.23 \times 10^{-2}$  | $\nu_3 + \nu_4$ | 13 11 2 | 13 10 3 |
| 2475.5310 | 0.11 | $0.44 \times 10^{-2}$  | $\nu_5 + \nu_9$ | 7 4 3   | 8 7 1   | 2478.4176 | 0.73 | $0.26 \times 10^{-2}$  | $\nu_3 + \nu_4$ | 13 11 3 | 13 10 4 |
| 2475.6069 | 2.21 | $-0.25 \times 10^{-2}$ | $\nu_3 + \nu_4$ | 10 5 6  | 10 4 7  | 2478.4749 | 1.50 | $-0.27 \times 10^{-2}$ | $\nu_5 + \nu_7$ | 9 3 6   | 8 3 5   |
| 2475.7637 | 1.09 | $-0.41 \times 10^{-2}$ | $\nu_5 + \nu_9$ | 10 5 6  | 11 6 6  | 2478.4749 | 1.50 | $-0.92 \times 10^{-3}$ | $\nu_5 + \nu_7$ | 14 3 11 | 13 3 10 |
| 2475.8035 | 1.02 | $-0.65 \times 10^{-2}$ | $\nu_5 + \nu_9$ | 10 4 7  | 11 5 7  | 2478.4970 | 0.66 | $0.38 \times 10^{-2}$  | $\nu_3 + \nu_4$ | 9 3 7   | 9 2 8   |
| 2475.8896 | 0.17 | $-0.43 \times 10^{-2}$ | $\nu_5 + \nu_9$ | 14 9 5  | 15 8 7  | 2478.5092 | 2.71 | $-0.17 \times 10^{-2}$ | $\nu_3 + \nu_4$ | 9 2 7   | 9 1 8   |
| 2475.9320 | 0.50 | $-0.54 \times 10^{-3}$ | $\nu_5 + \nu_7$ | 7 5 3   | 6 5 2   | 2478.5092 | 2.71 | $0.29 \times 10^{-2}$  | $\nu_3 + \nu_4$ | 12 7 5  | 12 6 6  |
| 2475.9903 | 1.22 | $-0.27 \times 10^{-2}$ | $\nu_3 + \nu_4$ | 9 4 6   | 9 3 7   | 2478.5701 | 0.25 | $-0.17 \times 10^{-3}$ | $\nu_5 + \nu_7$ | 15 0 15 | 14 2 12 |
| 2475.9903 | 1.22 | $0.12 \times 10^{-2}$  | $\nu_3 + \nu_4$ | 11 8 4  | 11 7 5  | 2478.5701 | 0.25 | $0.53 \times 10^{-3}$  | $\nu_5 + \nu_9$ | 13 7 7  | 14 6 9  |
| 2476.0552 | 1.58 | $-0.18 \times 10^{-2}$ | $\nu_3 + \nu_4$ | 10 9 2  | 10 8 3  | 2478.7226 | 0.62 | $0.53 \times 10^{-2}$  | $\nu_5 + \nu_7$ | 9 1 8   | 8 1 7   |
| 2476.0552 | 1.58 | $-0.18 \times 10^{-2}$ | $\nu_3 + \nu_4$ | 10 9 1  | 10 8 2  | 2478.7567 | 0.61 | $0.13 \times 10^{-2}$  | $\nu_3 + \nu_4$ | 14 11 3 | 14 10 4 |
| 2476.1027 | 1.84 | $0.47 \times 10^{-2}$  | $\nu_5 + \nu_7$ | 6 3 4   | 5 1 5   | 2478.7567 | 0.61 | $0.37 \times 10^{-2}$  | $\nu_3 + \nu_4$ | 14 11 4 | 14 10 5 |
| 2476.1264 | 1.13 | $0.39 \times 10^{-3}$  | $\nu_3 + \nu_4$ | 1 1 1   | 0 0 0   | 2478.9025 | 0.10 | $0.48 \times 10^{-2}$  | $2\nu_9$        | 9 5 4   | 8 8 1   |
| 2476.1264 | 1.13 | $0.24 \times 10^{-2}$  | $\nu_3 + \nu_4$ | 10 6 4  | 10 5 5  | 2479.0281 | 0.31 | $0.10 \times 10^{-2}$  | $\nu_5 + \nu_9$ | 13 5 9  | 14 4 11 |
| 2476.2221 | 0.18 | $-0.24 \times 10^{-2}$ | $\nu_5 + \nu_9$ | 14 9 6  | 15 8 8  | 2479.0634 | 1.02 | $0.70 \times 10^{-3}$  | $\nu_5 + \nu_7$ | 9 2 8   | 8 2 7   |
| 2476.2461 | 2.45 | $0.69 \times 10^{-2}$  | $\nu_5 + \nu_9$ | 9 9 1   | 10 10 1 | 2479.1632 | 0.19 | $0.31 \times 10^{-2}$  | $\nu_3 + \nu_4$ | 5 4 1   | 5 1 4   |
| 2476.2461 | 2.45 | $0.69 \times 10^{-2}$  | $\nu_5 + \nu_9$ | 9 9 0   | 10 10 0 | 2479.1743 | 0.22 | $-0.10 \times 10^{-2}$ | $\nu_5 + \nu_9$ | 7 1 7   | 8 4 5   |
| 2476.2934 | 1.83 | $0.38 \times 10^{-2}$  | $\nu_3 + \nu_4$ | 9 3 6   | 9 2 7   | 2479.1996 | 0.59 | $0.48 \times 10^{-2}$  | $\nu_3 + \nu_4$ | 11 3 8  | 11 2 9  |
| 2476.2934 | 1.83 | $0.38 \times 10^{-2}$  | $2\nu_9$        | 9 5 4   | 9 2 7   | 2479.1996 | 0.59 | $-0.48 \times 10^{-2}$ | $\nu_5 + \nu_9$ | 14 10 4 | 15 9 6  |
| 2476.3261 | 1.32 | $-0.28 \times 10^{-2}$ | $\nu_3 + \nu_4$ | 6 2 5   | 6 1 6   | 2479.2958 | 1.97 | $-0.26 \times 10^{-2}$ | $\nu_5 + \nu_7$ | 7 2 5   | 6 0 6   |
| 2476.3370 | 0.68 | $-0.25 \times 10^{-3}$ | $\nu_3 + \nu_4$ | 6 1 5   | 6 0 6   | 2479.2958 | 1.97 | $0.70 \times 10^{-4}$  | $2\nu_9$        | 7 7 0   | 7 4 3   |
| 2476.5160 | 0.37 | $-0.21 \times 10^{-2}$ | $\nu_5 + \nu_7$ | 6 4 2   | 5 2 3   | 2479.3444 | 2.38 | $-0.49 \times 10^{-2}$ | $\nu_5 + \nu_9$ | 9 7 2   | 10 8 2  |
| 2476.5451 | 1.86 | $-0.19 \times 10^{-2}$ | $\nu_3 + \nu_4$ | 10 4 6  | 10 3 7  | 2479.3444 | 2.38 | $-0.41 \times 10^{-3}$ | $\nu_5 + \nu_9$ | 9 7 3   | 10 8 3  |
| 2476.6052 | 2.36 | $-0.42 \times 10^{-2}$ | $\nu_3 + \nu_4$ | 11 7 4  | 11 6 5  | 2479.4194 | 1.53 | $-0.55 \times 10^{-3}$ | $\nu_5 + \nu_9$ | 10 4 6  | 11 5 6  |
| 2476.6473 | 1.49 | $0.53 \times 10^{-2}$  | $\nu_3 + \nu_4$ | 12 6 7  | 12 5 8  | 2479.4603 | 0.21 | $0.45 \times 10^{-2}$  | $\nu_5 + \nu_9$ | 13 4 9  | 14 3 11 |
| 2476.6923 | 0.10 | $0.24 \times 10^{-2}$  | $2\nu_9$        | 7 6 1   | 7 3 4   | 2479.7668 | 0.08 | $0.15 \times 10^{-2}$  | $\nu_5 + \nu_7$ | 9 9 1   | 9 7 2   |
| 2476.7378 | 2.14 | $0.22 \times 10^{-2}$  | $\nu_3 + \nu_4$ | 12 8 5  | 12 7 6  | 2479.8452 | 0.79 | $-0.30 \times 10^{-2}$ | $\nu_3 + \nu_4$ | 8 1 7   | 8 0 8   |
| 2476.7576 | 0.75 | $0.67 \times 10^{-2}$  | $\nu_3 + \nu_4$ | 11 5 7  | 11 4 8  | 2479.8452 | 0.79 | $-0.47 \times 10^{-2}$ | $\nu_3 + \nu_4$ | 8 2 7   | 8 1 8   |
| 2476.7576 | 0.75 | $0.10 \times 10^{-2}$  | $2\nu_9$        | 3 0 3   | 2 1 2   | 2479.8889 | 0.10 | $-0.36 \times 10^{-3}$ | $2\nu_9$        | 7 6 2   | 7 3 5   |
| 2476.8309 | 1.28 | $0.64 \times 10^{-3}$  | $\nu_3 + \nu_4$ | 8 3 6   | 8 2 7   | 2479.9135 | 0.29 | $-0.55 \times 10^{-2}$ | $\nu_3 + \nu_4$ | 13 5 9  | 13 4 10 |
| 2476.8309 | 1.28 | $0.20 \times 10^{-4}$  | $2\nu_9$        | 7 4 3   | 7 1 6   | 2479.9357 | 0.88 | $0.53 \times 10^{-2}$  | $\nu_5 + \nu_9$ | 9 0 9   | 10 1 9  |
| 2476.8853 | 0.91 | $0.20 \times 10^{-2}$  | $\nu_3 + \nu_4$ | 8 2 6   | 8 1 7   | 2479.9467 | 0.82 | $0.40 \times 10^{-2}$  | $\nu_5 + \nu_9$ | 9 1 9   | 10 2 9  |
| 2476.9113 | 0.77 | $-0.74 \times 10^{-3}$ | $\nu_3 + \nu_4$ | 10 10 0 | 10 9 1  | 2480.0092 | 0.22 | $0.18 \times 10^{-2}$  | $\nu_5 + \nu_9$ | 14 2 13 | 15 1 15 |
| 2476.9113 | 0.77 | $-0.74 \times 10^{-3}$ | $\nu_3 + \nu_4$ | 10 10 1 | 10 9 2  | 2480.0733 | 0.79 | $0.52 \times 10^{-2}$  | $\nu_3 + \nu_4$ | 13 4 9  | 13 3 10 |
| 2476.9318 | 0.10 | $0.23 \times 10^{-2}$  | $2\nu_9$        | 8 6 2   | 8 3 5   | 2480.3494 | 0.92 | $-0.48 \times 10^{-2}$ | $\nu_5 + \nu_7$ | 9 3 7   | 8 3 6   |
| 2476.9635 | 1.67 | $-0.46 \times 10^{-3}$ | $\nu_3 + \nu_4$ | 12 9 4  | 12 8 5  | 2480.4051 | 1.74 | $0.21 \times 10^{-2}$  | $\nu_3 + \nu_4$ | 10 2 8  | 10 1 9  |
| 2476.9635 | 1.67 | $-0.52 \times 10^{-2}$ | $\nu_5 + \nu_7$ | 8 4 4   | 7 4 3   | 2480.4051 | 1.74 | $0.92 \times 10^{-3}$  | $\nu_3 + \nu_4$ | 10 3 8  | 10 2 9  |
| 2477.0044 | 0.78 | $-0.26 \times 10^{-2}$ | $\nu_3 + \nu_4$ | 12 9 3  | 12 8 4  | 2480.4051 | 1.74 | $0.40 \times 10^{-2}$  | $2\nu_9$        | 3 2 2   | 2 1 1   |
| 2477.0389 | 0.10 | $0.18 \times 10^{-2}$  | $2\nu_9$        | 4 1 4   | 3 2 1   | 2480.4051 | 1.74 | $0.21 \times 10^{-2}$  | $2\nu_9$        | 10 2 8  | 10 1 9  |
| 2477.1846 | 0.12 | $-0.36 \times 10^{-2}$ | $\nu_5 + \nu_7$ | 7 3 4   | 6 1 5   | 2480.4787 | 0.50 | $0.45 \times 10^{-2}$  | $\nu_5 + \nu_9$ | 12 5 7  | 13 4 9  |
| 2477.3117 | 0.56 | $0.15 \times 10^{-2}$  | $2\nu_9$        | 3 1 3   | 2 0 2   | 2480.6030 | 0.07 | $0.37 \times 10^{-2}$  | $2\nu_9$        | 7 0 7   | 6 3 4   |
| 2477.3326 | 1.51 | $-0.60 \times 10^{-2}$ | $\nu_3 + \nu_4$ | 11 4 7  | 11 3 8  | 2480.6608 | 0.13 | $-0.42 \times 10^{-2}$ | $\nu_5 + \nu_9$ | 8 2 6   | 9 5 4   |
| 2477.4112 | 1.38 | $0.59 \times 10^{-2}$  | $\nu_5 + \nu_9$ | 10 5 5  | 11 6 5  | 2480.6852 | 0.21 | $0.26 \times 10^{-2}$  | $\nu_5 + \nu_9$ | 13 4 10 | 14 3 12 |
| 2477.4624 | 1.10 | $0.49 \times 10^{-3}$  | $\nu_3 + \nu_4$ | 12 10 2 | 12 9 3  | 2480.8145 | 0.23 | $-0.23 \times 10^{-2}$ | $\nu_5 + \nu_9$ | 7 2 6   | 8 5 4   |
| 2477.4624 | 1.10 | $0.18 \times 10^{-2}$  | $\nu_3 + \nu_4$ | 12 10 3 | 12 9 4  | 2480.9626 | 1.81 | $0.29 \times 10^{-2}$  | $\nu_5 + \nu_9$ | 9 6 4   | 10 7 4  |
| 2477.4981 | 0.77 | $0.10 \times 10^{-2}$  | $\nu_3 + \nu_4$ | 13 8 6  | 13 7 7  | 2481.0283 | 0.18 | $0.55 \times 10^{-3}$  | $2\nu_9$        | 12 1 12 | 11 2 9  |
| 2477.5783 | 0.79 | $0.53 \times 10^{-2}$  | $\nu_3 + \nu_4$ | 10 3 7  | 10 2 8  | 2481.0537 | 1.33 | $0.45 \times 10^{-2}$  | $\nu_5 + \nu_9$ | 9 6 3   | 10 7 3  |
| 2477.6416 | 0.63 | $-0.31 \times 10^{-2}$ | $\nu_3 + \nu_4$ | 13 6 8  | 13 5 9  | 2481.1284 | 0.32 | $0.26 \times 10^{-2}$  | $\nu_3 + \nu_4$ | 12 3 9  | 12 2 10 |
| 2477.7672 | 2.62 | $-0.37 \times 10^{-2}$ | $\nu_5 + \nu_9$ | 9 8 2   | 10 9 2  | 2481.1894 | 0.46 | $-0.64 \times 10^{-2}$ | $\nu_3 + \nu_4$ | 12 4 9  | 12 3 10 |
| 2477.7672 | 2.62 | $-0.38 \times 10^{-2}$ | $\nu_5 + \nu_9$ | 9 8 1   | 10 9 1  | 2481.3327 | 0.34 | $0.23 \times 10^{-2}$  | $\nu_5 + \nu_7$ | 8 5 4   | 7 5 3   |
| 2477.8025 | 2.39 | $-0.47 \times 10^{-2}$ | $\nu_3 + \nu_4$ | 11 5 6  | 11 4 7  | 2481.3645 | 0.08 | $0.17 \times 10^{-3}$  | $\nu_5 + \nu_7$ | 11 10 2 | 11 8 3  |
| 2477.8352 | 2.63 | $0.90 \times 10^{-4}$  | $\nu_3 + \nu_4$ | 11 6 5  | 11 5 6  | 2481.4155 | 1.29 | $0.24 \times 10^{-3}$  | $\nu_3 + \nu_4$ | 2 0 2   | 1 1 1   |
| 2477.9136 | 0.70 | $0.15 \times 10^{-2}$  | $\nu_3 + \nu_4$ | 13 10 3 | 13 9 4  | 2481.4486 | 0.19 | $0.33 \times 10^{-2}$  | $\nu_3 + \nu_4$ | 6 4 2   | 6 1 5   |
| 2477.9776 | 0.96 | $-0.58 \times 10^{-2}$ | $\nu_3 + \nu_4$ | 7 1 6   | 7 0 7   | 2481.5067 | 1.32 | $0.68 \times 10^{-3}$  | $\nu_5 + \nu_9$ | 9 2 8   | 10 3 8  |
| 2477.9776 | 0.96 | $-0.16 \times 10^{-2}$ | $\nu_3 + \nu_4$ | 7 2 6   | 7 1 7   | 2481.5667 | 0.21 | $-0.41 \times 10^{-2}$ | $2\nu_9$        | 8 8 0   | 8 5 3   |
| 2478.0033 | 0.91 | $0.11 \times 10^{-2}$  | $\nu_3 + \nu_4$ | 11 11 0 | 11 10 1 | 2481.7125 | 0.75 | $-0.24 \times 10^{-2}$ | $\nu_5 + \nu_7$ | 9 4 5   | 8 4 4   |
| 2478.0033 | 0.91 | $0.11 \times 10^{-2}$  | $\nu_3 + \nu_4$ | 11 11 1 | 11 10 2 | 2481.7514 | 0.15 | $-0.20 \times 10^{-4}$ | $\nu_3 + \nu_4$ | 6 5 1   | 6 2 4   |
| 2478.0033 | 0.91 | $-0.33 \times 10^{-2}$ | $\nu_5 + \nu_7$ | 9 1 9   | 8 1 8   | 2481.8938 | 0.12 | $-0.34 \times 10^{-2}$ | $2\nu_9$        | 8 6 3   | 8 3 6   |
| 2478.0033 | 0.91 | $0.26 \times 10^{-2}$  | $2\nu_9$        | 9 6 3   | 9 3 6   | 2481.9116 | 0.60 | $-0.20 \times 10^{-2}$ | $\nu_5 + \nu_9$ | 9 1 8   | 10 2 8  |
| 2478.1487 | 0.48 | $0.31 \times 10^{-3}$  | $\nu_5 + \nu_7$ | 12 2 10 | 11 4 7  | 2481.9291 | 0.32 | $-0.26 \times 10^{-2}$ | $\nu_3 + \nu_4$ | 9 1 8   | 9 0 9   |
| 2478.1795 | 0.68 | $0.29 \times 10^{-2}$  | $\nu_3 + \nu_4$ | 12 5 8  | 12 4 9  | 2481.9291 | 0.32 | $0.42 \times 10^{-3}$  | $\nu_5 + \nu_9$ | 13 3 10 | 14 2 12 |
| 2478.1795 | 0.68 | $-0.82 \times 10^{-3}$ | $\nu_3 + \nu_4$ | 12 11 2 | 12 10 3 | 2481.9379 | 0.36 | $0.62 \times 10^{-2}$  | $\nu_3 + \nu_4$ | 9 1 8   | 9 0 9   |
| 2478.1795 | 0.68 | $-0.38 \times 10^{-2}$ | $2\nu_9$        | 6 5 2   | 6 2 5   | 2481.9379 | 0.36 | $-0.57 \times 10^{-3}$ | $\nu_3 + \nu_4$ | 9 2 8   | 9 1 9   |
| 2478.2000 | 0.26 | $-0.49 \times 10^{-2}$ | $\nu_5 + \nu_9$ | 13 6 8  | 14 5 10 | 2481.9717 | 0.10 | $0.20 \times 10^{-2}$  | $\nu_3 + \nu_4$ | 5 3 2   | 5 0 5   |
| 2478.2530 | 1.12 | $0.24 \times 10^{-2}$  | $\nu_5 + \nu_7$ | 9 2 7   | 8 2 6   | 2482.0108 | 0.41 | $0.15 \times 10^{-2}$  | $\nu_5 + \nu_7$ | 13 4 10 | 12 6 7  |
| 2478.2638 | 1.15 | $-0.11 \times 10^{-2}$ | $\nu_3 + \nu_4$ | 12 5 7  | 12 4 8  | 2482.1317 | 0.94 | $0.23 \times 10^{-2}$  | $\nu_3 + \nu_4$ | 14 7 7  | 14 6 8  |

| (I)       | (II) | (III)                  | (IV)            | (V)     | (VI)    | (I)       | (II) | (III)                  | (IV)            | (V)     | (VI)    |
|-----------|------|------------------------|-----------------|---------|---------|-----------|------|------------------------|-----------------|---------|---------|
| 2482.1992 | 0.63 | $0.17 \times 10^{-2}$  | $2\nu_9$        | 4 0 4   | 3 1 3   | 2487.1556 | 0.87 | $0.18 \times 10^{-2}$  | $2\nu_9$        | 5 0 5   | 4 1 4   |
| 2482.2756 | 0.47 | $-0.80 \times 10^{-4}$ | $2\nu_9$        | 3 3 1   | 2 2 0   | 2487.1718 | 0.45 | $-0.14 \times 10^{-2}$ | $\nu_5 + \nu_9$ | 12 3 9  | 13 2 11 |
| 2482.2910 | 2.12 | $0.67 \times 10^{-3}$  | $\nu_3 + \nu_4$ | 2 1 2   | 1 0 1   | 2487.2517 | 0.69 | $0.24 \times 10^{-2}$  | $2\nu_9$        | 5 1 5   | 4 0 4   |
| 2482.3783 | 0.13 | $-0.14 \times 10^{-2}$ | $\nu_5 + \nu_7$ | 15 1 14 | 14 3 11 | 2487.3877 | 0.09 | $-0.46 \times 10^{-2}$ | $\nu_3 + \nu_4$ | 13 3 11 | 13 2 12 |
| 2482.4476 | 0.83 | $0.18 \times 10^{-2}$  | $2\nu_9$        | 4 1 4   | 3 0 3   | 2487.5795 | 0.09 | $0.40 \times 10^{-2}$  | $\nu_5 + \nu_7$ | 15 1 15 | 14 3 12 |
| 2482.5472 | 0.70 | $-0.49 \times 10^{-2}$ | $\nu_3 + \nu_4$ | 7 5 2   | 7 2 5   | 2487.6765 | 0.22 | $-0.13 \times 10^{-3}$ | $\nu_5 + \nu_9$ | 12 8 5  | 13 7 7  |
| 2482.5472 | 0.70 | $0.20 \times 10^{-2}$  | $\nu_3 + \nu_4$ | 11 3 9  | 11 2 10 | 2487.7859 | 3.46 | $-0.43 \times 10^{-3}$ | $\nu_3 + \nu_4$ | 3 0 3   | 2 1 2   |
| 2482.5472 | 0.70 | $0.17 \times 10^{-3}$  | $2\nu_9$        | 3 3 0   | 2 2 1   | 2487.8199 | 1.61 | $0.29 \times 10^{-2}$  | $\nu_5 + \nu_9$ | 8 6 3   | 9 7 3   |
| 2482.6785 | 1.67 | $-0.13 \times 10^{-3}$ | $\nu_5 + \nu_9$ | 9 5 5   | 10 6 5  | 2487.8199 | 1.61 | $-0.47 \times 10^{-2}$ | $2\nu_9$        | 9 5 5   | 9 2 8   |
| 2482.7852 | 0.72 | $-0.69 \times 10^{-3}$ | $\nu_5 + \nu_7$ | 9 4 6   | 8 4 5   | 2487.8402 | 2.08 | $0.28 \times 10^{-2}$  | $\nu_5 + \nu_9$ | 8 6 2   | 9 7 2   |
| 2482.8976 | 1.65 | $-0.35 \times 10^{-2}$ | $\nu_5 + \nu_9$ | 9 3 7   | 10 4 7  | 2487.8682 | 0.10 | $-0.70 \times 10^{-4}$ | $\nu_3 + \nu_4$ | 6 4 3   | 6 1 6   |
| 2482.9753 | 0.32 | $0.16 \times 10^{-2}$  | $\nu_5 + \nu_9$ | 12 7 5  | 13 6 7  | 2487.9872 | 0.26 | $0.15 \times 10^{-2}$  | $\nu_5 + \nu_9$ | 12 4 9  | 13 3 11 |
| 2483.1291 | 0.26 | $0.89 \times 10^{-3}$  | $\nu_5 + \nu_9$ | 7 3 4   | 8 6 2   | 2488.0113 | 0.13 | $-0.36 \times 10^{-2}$ | $\nu_5 + \nu_9$ | 7 1 6   | 8 4 4   |
| 2483.1291 | 0.26 | $-0.13 \times 10^{-2}$ | $2\nu_9$        | 3 2 1   | 2 1 2   | 2488.0256 | 0.14 | $-0.44 \times 10^{-2}$ | $\nu_3 + \nu_4$ | 5 1 4   | 4 4 1   |
| 2483.1997 | 0.37 | $-0.12 \times 10^{-2}$ | $\nu_5 + \nu_9$ | 13 3 11 | 14 2 13 | 2488.1472 | 0.49 | $-0.40 \times 10^{-4}$ | $\nu_5 + \nu_7$ | 10 4 7  | 9 4 6   |
| 2483.2385 | 0.16 | $0.22 \times 10^{-2}$  | $\nu_5 + \nu_9$ | 13 9 4  | 14 8 6  | 2488.2634 | 0.31 | $-0.30 \times 10^{-3}$ | $\nu_3 + \nu_4$ | 9 5 4   | 9 2 7   |
| 2483.3573 | 0.29 | $-0.13 \times 10^{-2}$ | $\nu_3 + \nu_4$ | 13 4 10 | 13 3 11 | 2488.2840 | 2.12 | $0.86 \times 10^{-3}$  | $\nu_3 + \nu_4$ | 3 1 3   | 2 0 2   |
| 2483.3573 | 0.29 | $0.15 \times 10^{-2}$  | $\nu_5 + \nu_9$ | 13 9 5  | 14 8 7  | 2488.4542 | 0.81 | $0.24 \times 10^{-2}$  | $\nu_5 + \nu_9$ | 8 1 8   | 9 2 8   |
| 2483.4196 | 1.80 | $-0.24 \times 10^{-2}$ | $\nu_5 + \nu_9$ | 9 4 6   | 10 5 6  | 2488.4780 | 1.06 | $0.21 \times 10^{-2}$  | $\nu_5 + \nu_9$ | 8 0 8   | 9 1 8   |
| 2483.5020 | 1.24 | $0.62 \times 10^{-2}$  | $\nu_5 + \nu_9$ | 9 5 4   | 10 6 4  | 2488.5034 | 0.14 | $-0.42 \times 10^{-2}$ | $\nu_5 + \nu_9$ | 7 2 5   | 8 5 3   |
| 2483.5020 | 1.24 | $-0.14 \times 10^{-2}$ | $2\nu_9$        | 9 9 1   | 9 6 4   | 2488.5556 | 0.62 | $-0.65 \times 10^{-3}$ | $2\nu_9$        | 6 4 3   | 5 5 0   |
| 2483.6480 | 2.23 | $0.82 \times 10^{-3}$  | $\nu_3 + \nu_4$ | 2 2 1   | 1 1 0   | 2488.6203 | 0.09 | $0.28 \times 10^{-2}$  | $\nu_3 + \nu_4$ | 6 6 1   | 6 3 4   |
| 2483.7806 | 1.17 | $-0.65 \times 10^{-2}$ | $\nu_5 + \nu_9$ | 9 2 7   | 10 3 7  | 2488.6535 | 0.11 | $0.18 \times 10^{-2}$  | $\nu_3 + \nu_4$ | 7 5 3   | 7 2 6   |
| 2483.8784 | 1.39 | $-0.30 \times 10^{-2}$ | $\nu_5 + \nu_7$ | 10 3 7  | 9 3 6   | 2488.8386 | 0.10 | $-0.48 \times 10^{-3}$ | $2\nu_9$        | 6 2 5   | 5 3 2   |
| 2483.8919 | 0.22 | $0.10 \times 10^{-2}$  | $\nu_3 + \nu_4$ | 3 1 3   | 2 2 0   | 2488.8914 | 0.69 | $-0.36 \times 10^{-2}$ | $\nu_3 + \nu_4$ | 4 2 3   | 3 3 0   |
| 2483.9438 | 0.24 | $-0.81 \times 10^{-3}$ | $2\nu_9$        | 4 1 3   | 3 2 2   | 2488.8914 | 0.69 | $-0.70 \times 10^{-3}$ | $\nu_5 + \nu_9$ | 11 4 7  | 12 3 9  |
| 2484.0148 | 0.11 | $-0.26 \times 10^{-2}$ | $\nu_5 + \nu_7$ | 7 3 5   | 6 1 6   | 2488.9652 | 0.57 | $-0.31 \times 10^{-2}$ | $2\nu_9$        | 4 3 2   | 3 2 1   |
| 2484.1762 | 0.49 | $-0.83 \times 10^{-3}$ | $\nu_5 + \nu_7$ | 10 0 10 | 9 0 9   | 2489.0080 | 0.16 | $-0.20 \times 10^{-2}$ | $\nu_5 + \nu_9$ | 13 11 2 | 14 10 4 |
| 2484.2629 | 0.37 | $0.30 \times 10^{-2}$  | $\nu_5 + \nu_9$ | 12 6 7  | 13 5 9  | 2489.0080 | 0.16 | $-0.24 \times 10^{-2}$ | $\nu_5 + \nu_9$ | 13 11 3 | 14 10 5 |
| 2484.2629 | 0.37 | $-0.32 \times 10^{-2}$ | $\nu_5 + \nu_9$ | 12 4 8  | 13 3 10 | 2489.2198 | 0.07 | $-0.14 \times 10^{-2}$ | $\nu_3 + \nu_4$ | 10 6 4  | 9 9 1   |
| 2484.3526 | 0.13 | $-0.82 \times 10^{-3}$ | $\nu_3 + \nu_4$ | 4 0 4   | 3 3 1   | 2489.2712 | 0.11 | $0.28 \times 10^{-2}$  | $\nu_3 + \nu_4$ | 8 4 4   | 8 1 7   |
| 2484.4565 | 1.08 | $0.99 \times 10^{-3}$  | $\nu_3 + \nu_4$ | 2 2 0   | 1 1 1   | 2489.2712 | 0.11 | $-0.28 \times 10^{-2}$ | $\nu_3 + \nu_4$ | 12 1 11 | 12 0 12 |
| 2484.5266 | 0.27 | $0.53 \times 10^{-2}$  | $2\nu_9$        | 5 2 4   | 4 3 1   | 2489.3348 | 0.29 | $-0.66 \times 10^{-2}$ | $\nu_3 + \nu_4$ | 5 0 5   | 4 3 2   |
| 2484.6215 | 3.21 | $0.97 \times 10^{-3}$  | $\nu_5 + \nu_9$ | 8 8 0   | 9 9 0   | 2489.5421 | 1.71 | $0.40 \times 10^{-2}$  | $\nu_5 + \nu_9$ | 8 5 4   | 9 6 4   |
| 2484.6215 | 3.21 | $0.97 \times 10^{-3}$  | $\nu_5 + \nu_9$ | 8 8 1   | 9 9 1   | 2489.6126 | 0.23 | $0.20 \times 10^{-2}$  | $2\nu_9$        | 4 4 1   | 3 3 0   |
| 2484.6698 | 0.18 | $0.41 \times 10^{-2}$  | $2\nu_9$        | 9 6 4   | 9 3 7   | 2489.6798 | 0.76 | $0.39 \times 10^{-2}$  | $2\nu_9$        | 4 4 0   | 3 3 1   |
| 2484.7214 | 0.14 | $-0.24 \times 10^{-2}$ | $\nu_5 + \nu_7$ | 8 3 5   | 7 1 6   | 2489.8501 | 2.35 | $0.64 \times 10^{-2}$  | $\nu_5 + \nu_9$ | 8 5 3   | 9 6 3   |
| 2484.7472 | 0.26 | $-0.38 \times 10^{-2}$ | $\nu_3 + \nu_4$ | 8 5 3   | 8 2 6   | 2489.8795 | 1.29 | $-0.16 \times 10^{-2}$ | $\nu_5 + \nu_9$ | 8 2 7   | 9 3 7   |
| 2484.8838 | 0.13 | $-0.12 \times 10^{-2}$ | $\nu_3 + \nu_4$ | 12 3 10 | 12 2 11 | 2489.9434 | 1.76 | $0.89 \times 10^{-3}$  | $\nu_3 + \nu_4$ | 3 2 2   | 2 1 1   |
| 2484.9804 | 0.58 | $0.38 \times 10^{-2}$  | $\nu_5 + \nu_7$ | 10 1 9  | 9 1 8   | 2490.0181 | 0.11 | $0.38 \times 10^{-2}$  | $\nu_3 + \nu_4$ | 14 2 12 | 14 1 13 |
| 2485.1732 | 0.45 | $0.15 \times 10^{-2}$  | $\nu_5 + \nu_7$ | 10 2 9  | 9 2 8   | 2490.0378 | 0.11 | $-0.18 \times 10^{-2}$ | $\nu_3 + \nu_4$ | 14 3 12 | 14 2 13 |
| 2485.2959 | 0.25 | $-0.13 \times 10^{-2}$ | $\nu_5 + \nu_9$ | 12 7 6  | 13 6 8  | 2490.0659 | 0.13 | $-0.64 \times 10^{-2}$ | $2\nu_9$        | 5 2 3   | 4 3 2   |
| 2485.5931 | 0.16 | $0.27 \times 10^{-2}$  | $\nu_5 + \nu_7$ | 6 5 1   | 5 3 2   | 2490.1394 | 0.43 | $0.11 \times 10^{-2}$  | $2\nu_9$        | 5 1 4   | 4 2 3   |
| 2485.7552 | 0.54 | $0.47 \times 10^{-2}$  | $\nu_5 + \nu_9$ | 11 5 6  | 12 4 8  | 2490.1582 | 1.74 | $-0.21 \times 10^{-2}$ | $\nu_5 + \nu_9$ | 8 1 7   | 9 2 7   |
| 2485.8689 | 0.22 | $0.31 \times 10^{-2}$  | $\nu_5 + \nu_7$ | 15 3 13 | 14 5 10 | 2490.3045 | 0.20 | $0.61 \times 10^{-3}$  | $2\nu_9$        | 4 3 1   | 3 2 2   |
| 2485.8895 | 0.20 | $-0.35 \times 10^{-2}$ | $\nu_5 + \nu_7$ | 8 6 3   | 7 6 2   | 2490.3164 | 0.11 | $0.39 \times 10^{-2}$  | $\nu_5 + \nu_7$ | 7 5 2   | 6 3 3   |
| 2485.9310 | 0.19 | $-0.17 \times 10^{-2}$ | $\nu_3 + \nu_4$ | 8 6 2   | 8 3 5   | 2490.3651 | 0.37 | $0.58 \times 10^{-2}$  | $\nu_5 + \nu_7$ | 11 0 11 | 10 0 10 |
| 2486.1300 | 0.08 | $-0.49 \times 10^{-2}$ | $\nu_3 + \nu_4$ | 6 3 3   | 6 0 6   | 2490.3651 | 0.37 | $0.18 \times 10^{-2}$  | $\nu_5 + \nu_7$ | 11 1 11 | 10 1 10 |
| 2486.1661 | 0.50 | $0.14 \times 10^{-2}$  | $2\nu_9$        | 4 2 3   | 3 1 2   | 2490.4456 | 0.16 | $-0.10 \times 10^{-3}$ | $\nu_5 + \nu_9$ | 12 9 3  | 13 8 5  |
| 2486.1829 | 2.55 | $0.87 \times 10^{-3}$  | $\nu_5 + \nu_7$ | 10 3 8  | 9 3 7   | 2490.4826 | 0.13 | $-0.41 \times 10^{-3}$ | $\nu_5 + \nu_9$ | 12 9 4  | 13 8 6  |
| 2486.1829 | 2.55 | $0.29 \times 10^{-2}$  | $\nu_5 + \nu_9$ | 9 4 5   | 10 5 5  | 2490.5847 | 0.39 | $-0.39 \times 10^{-2}$ | $\nu_5 + \nu_9$ | 11 6 6  | 12 5 8  |
| 2486.1936 | 3.21 | $-0.28 \times 10^{-2}$ | $\nu_5 + \nu_9$ | 8 7 2   | 9 8 2   | 2490.6545 | 0.21 | $-0.28 \times 10^{-2}$ | $\nu_3 + \nu_4$ | 10 7 3  | 10 4 6  |
| 2486.1936 | 3.21 | $-0.34 \times 10^{-2}$ | $\nu_5 + \nu_9$ | 8 7 1   | 9 8 1   | 2490.6948 | 0.72 | $-0.25 \times 10^{-2}$ | $\nu_5 + \nu_7$ | 11 4 7  | 10 4 6  |
| 2486.2340 | 0.12 | $-0.67 \times 10^{-3}$ | $\nu_5 + \nu_9$ | 13 10 4 | 14 9 6  | 2490.7848 | 1.74 | $0.18 \times 10^{-2}$  | $\nu_5 + \nu_9$ | 8 4 5   | 9 5 5   |
| 2486.2494 | 0.13 | $0.26 \times 10^{-2}$  | $\nu_3 + \nu_4$ | 7 6 1   | 7 3 4   | 2490.8614 | 2.48 | $-0.60 \times 10^{-4}$ | $\nu_3 + \nu_4$ | 3 3 1   | 2 2 0   |
| 2486.3375 | 0.31 | $-0.22 \times 10^{-2}$ | $2\nu_9$        | 5 3 2   | 4 4 1   | 2490.8966 | 1.54 | $0.39 \times 10^{-2}$  | $\nu_5 + \nu_7$ | 8 7 2   | 7 7 1   |
| 2486.3720 | 1.59 | $-0.53 \times 10^{-2}$ | $\nu_5 + \nu_9$ | 9 3 6   | 10 4 6  | 2490.8966 | 1.54 | $-0.54 \times 10^{-2}$ | $\nu_5 + \nu_7$ | 8 7 1   | 7 7 0   |
| 2486.4015 | 1.00 | $0.12 \times 10^{-3}$  | $\nu_5 + \nu_7$ | 9 5 4   | 8 5 3   | 2490.8966 | 1.54 | $-0.25 \times 10^{-2}$ | $\nu_5 + \nu_9$ | 8 3 6   | 9 4 6   |
| 2486.4634 | 0.43 | $-0.19 \times 10^{-2}$ | $\nu_3 + \nu_4$ | 6 5 2   | 6 2 5   | 2491.0385 | 0.66 | $0.32 \times 10^{-2}$  | $\nu_5 + \nu_7$ | 11 2 9  | 10 2 8  |
| 2486.4865 | 0.14 | $0.19 \times 10^{-2}$  | $\nu_5 + \nu_9$ | 6 3 4   | 7 6 2   | 2491.0385 | 0.66 | $-0.18 \times 10^{-2}$ | $\nu_5 + \nu_9$ | 11 7 4  | 12 6 6  |
| 2486.5635 | 0.58 | $0.55 \times 10^{-2}$  | $\nu_5 + \nu_7$ | 9 5 5   | 8 5 4   | 2491.0598 | 0.11 | $0.24 \times 10^{-2}$  | $2\nu_9$        | 9 1 8   | 8 4 5   |
| 2486.5906 | 0.41 | $0.33 \times 10^{-2}$  | $\nu_5 + \nu_9$ | 11 6 5  | 12 5 7  | 2491.0942 | 0.48 | $-0.66 \times 10^{-2}$ | $\nu_3 + \nu_4$ | 9 7 2   | 9 4 5   |
| 2486.6073 | 0.19 | $-0.18 \times 10^{-2}$ | $\nu_5 + \nu_7$ | 8 4 4   | 7 2 5   | 2491.0942 | 0.48 | $-0.32 \times 10^{-2}$ | $\nu_3 + \nu_4$ | 11 7 4  | 11 4 7  |
| 2486.6805 | 0.16 | $-0.42 \times 10^{-2}$ | $\nu_3 + \nu_4$ | 11 2 10 | 11 1 11 | 2491.1330 | 0.19 | $0.46 \times 10^{-2}$  | $2\nu_9$        | 9 4 6   | 9 1 9   |
| 2486.9135 | 0.09 | $0.45 \times 10^{-2}$  | $\nu_3 + \nu_4$ | 6 6 0   | 6 3 3   | 2491.1575 | 0.70 | $0.28 \times 10^{-2}$  | $\nu_5 + \nu_7$ | 10 5 5  | 9 5 4   |
| 2487.0080 | 0.17 | $0.14 \times 10^{-3}$  | $\nu_5 + \nu_9$ | 12 5 8  | 13 4 10 | 2491.1705 | 2.62 | $0.37 \times 10^{-3}$  | $\nu_3 + \nu_4$ | 3 3 0   | 2 2 1   |
| 2487.1193 | 1.11 | $-0.46 \times 10^{-3}$ | $\nu_3 + \nu_4$ | 3 1 2   | 2 2 1   | 2491.2089 | 0.32 | $0.23 \times 10^{-2}$  | $\nu_5 + \nu_7$ | 11 1 10 | 10 1 9  |



| (I)       | (II) | (III)                  | (IV)            | (V)     | (VI)    | (I)       | (II) | (III)                  | (IV)            | (V)                   | (VI)            |       |       |
|-----------|------|------------------------|-----------------|---------|---------|-----------|------|------------------------|-----------------|-----------------------|-----------------|-------|-------|
| 2491.3121 | 0.41 | $0.37 \times 10^{-3}$  | $\nu_5 + \nu_7$ | 11      | 2 10    | 10        | 2 9  | 2495.3774              | 0.23            | $0.15 \times 10^{-2}$ | $\nu_5 + \nu_9$ | 6 2 4 | 7 5 2 |
| 2491.3583 | 0.09 | $0.41 \times 10^{-2}$  | $\nu_3 + \nu_4$ | 7 4 4   | 7 1 7   | 2495.4619 | 0.84 | $-0.51 \times 10^{-2}$ | $\nu_5 + \nu_7$ | 12 4 8                | 11 4 7          |       |       |
| 2491.4481 | 0.29 | $0.31 \times 10^{-2}$  | $\nu_3 + \nu_4$ | 8 5 4   | 8 2 7   | 2495.4799 | 0.40 | $0.48 \times 10^{-2}$  | $\nu_5 + \nu_7$ | 11 5 6                | 10 5 5          |       |       |
| 2491.4587 | 0.32 | $0.13 \times 10^{-2}$  | $2\nu_9$        | 5 2 4   | 4 1 3   | 2495.6451 | 0.36 | $-0.34 \times 10^{-2}$ | $\nu_3 + \nu_4$ | 16 2 14               | 16 1 15         |       |       |
| 2491.6483 | 0.89 | $0.13 \times 10^{-2}$  | $2\nu_9$        | 6 0 6   | 5 1 5   | 2495.6451 | 0.36 | $0.72 \times 10^{-3}$  | $2\nu_9$        | 6 1 5                 | 5 2 4           |       |       |
| 2491.6666 | 0.53 | $0.19 \times 10^{-2}$  | $\nu_3 + \nu_4$ | 4 2 2   | 3 3 1   | 2495.6983 | 0.85 | $0.95 \times 10^{-3}$  | $2\nu_9$        | 7 0 7                 | 6 1 6           |       |       |
| 2491.6666 | 0.53 | $-0.10 \times 10^{-2}$ | $\nu_5 + \nu_9$ | 13 12 1 | 14 11 3 | 2495.7088 | 0.57 | $-0.46 \times 10^{-3}$ | $2\nu_9$        | 7 1 7                 | 6 0 6           |       |       |
| 2491.6666 | 0.53 | $-0.10 \times 10^{-2}$ | $\nu_5 + \nu_9$ | 13 12 2 | 14 11 4 | 2495.8939 | 0.15 | $0.48 \times 10^{-2}$  | $2\nu_9$        | 7 4 4                 | 6 5 1           |       |       |
| 2491.6818 | 0.84 | $0.13 \times 10^{-2}$  | $2\nu_9$        | 6 1 6   | 5 0 5   | 2495.9308 | 0.75 | $0.45 \times 10^{-2}$  | $\nu_5 + \nu_7$ | 12 1 11               | 11 3 8          |       |       |
| 2491.8310 | 0.09 | $0.25 \times 10^{-2}$  | $\nu_3 + \nu_4$ | 8 7 1   | 8 4 4   | 2495.9451 | 2.38 | $-0.25 \times 10^{-2}$ | $\nu_3 + \nu_4$ | 4 2 3                 | 3 1 2           |       |       |
| 2491.8575 | 0.42 | $-0.46 \times 10^{-2}$ | $2\nu_9$        | 7 2 6   | 6 3 3   | 2496.0624 | 0.09 | $0.20 \times 10^{-3}$  | $2\nu_9$        | 5 5 1                 | 4 4 0           |       |       |
| 2491.9496 | 0.13 | $-0.46 \times 10^{-3}$ | $2\nu_9$        | 4 2 2   | 3 1 3   | 2496.0778 | 0.34 | $-0.61 \times 10^{-3}$ | $2\nu_9$        | 5 5 0                 | 4 4 1           |       |       |
| 2491.9705 | 0.35 | $0.11 \times 10^{-2}$  | $\nu_3 + \nu_4$ | 11 6 5  | 11 3 8  | 2496.1735 | 0.32 | $-0.56 \times 10^{-2}$ | $\nu_5 + \nu_7$ | 10 6 4                | 9 6 3           |       |       |
| 2492.0257 | 0.20 | $0.61 \times 10^{-3}$  | $\nu_5 + \nu_7$ | 7 5 3   | 6 3 4   | 2496.1880 | 0.10 | $-0.33 \times 10^{-2}$ | $\nu_5 + \nu_7$ | 9 7 3                 | 8 7 2           |       |       |
| 2492.1000 | 0.55 | $-0.18 \times 10^{-2}$ | $\nu_5 + \nu_7$ | 11 3 9  | 10 3 8  | 2496.2300 | 0.17 | $0.20 \times 10^{-2}$  | $\nu_5 + \nu_7$ | 10 6 5                | 9 6 4           |       |       |
| 2492.2391 | 0.39 | $-0.12 \times 10^{-2}$ | $\nu_5 + \nu_9$ | 11 7 5  | 12 6 7  | 2496.3283 | 0.44 | $-0.30 \times 10^{-4}$ | $2\nu_9$        | 6 2 5                 | 5 1 4           |       |       |
| 2492.3946 | 0.11 | $-0.15 \times 10^{-2}$ | $\nu_5 + \nu_7$ | 9 4 5   | 8 2 6   | 2496.3725 | 2.66 | $0.46 \times 10^{-2}$  | $\nu_5 + \nu_9$ | 7 5 3                 | 8 6 3           |       |       |
| 2492.4357 | 0.15 | $-0.56 \times 10^{-2}$ | $\nu_3 + \nu_4$ | 7 7 0   | 7 4 3   | 2496.4574 | 1.99 | $0.58 \times 10^{-2}$  | $\nu_5 + \nu_9$ | 7 5 2                 | 8 6 2           |       |       |
| 2492.5189 | 2.44 | $0.53 \times 10^{-2}$  | $\nu_5 + \nu_9$ | 8 4 4   | 9 5 4   | 2496.5133 | 0.16 | $0.37 \times 10^{-2}$  | $2\nu_9$        | 7 3 5                 | 6 4 2           |       |       |
| 2492.6128 | 2.03 | $-0.56 \times 10^{-2}$ | $\nu_5 + \nu_9$ | 8 2 6   | 9 3 6   | 2496.6679 | 0.45 | $-0.78 \times 10^{-3}$ | $\nu_5 + \nu_7$ | 11 5 7                | 10 5 6          |       |       |
| 2492.7539 | 0.12 | $0.66 \times 10^{-3}$  | $\nu_3 + \nu_4$ | 9 6 4   | 9 3 7   | 2496.6679 | 0.45 | $0.47 \times 10^{-2}$  | $2\nu_9$        | 4 4 1                 | 3 1 2           |       |       |
| 2492.7820 | 0.08 | $-0.50 \times 10^{-2}$ | $\nu_3 + \nu_4$ | 15 2 13 | 15 1 14 | 2496.7869 | 0.10 | $0.50 \times 10^{-2}$  | $\nu_5 + \nu_7$ | 14 4 10               | 13 4 9          |       |       |
| 2492.8706 | 0.12 | $-0.47 \times 10^{-2}$ | $2\nu_9$        | 8 2 6   | 7 5 3   | 2496.8113 | 0.17 | $0.37 \times 10^{-2}$  | $2\nu_9$        | 5 4 2                 | 4 3 1           |       |       |
| 2492.9474 | 0.64 | $0.50 \times 10^{-3}$  | $\nu_3 + \nu_4$ | 5 3 3   | 4 4 0   | 2496.9033 | 1.40 | $-0.53 \times 10^{-3}$ | $\nu_5 + \nu_9$ | 7 1 7                 | 8 2 7           |       |       |
| 2493.0090 | 0.11 | $0.10 \times 10^{-2}$  | $\nu_5 + \nu_7$ | 14 12 2 | 13 12 1 | 2496.9490 | 1.02 | $-0.78 \times 10^{-3}$ | $\nu_5 + \nu_9$ | 7 0 7                 | 8 1 7           |       |       |
| 2493.0468 | 4.10 | $-0.49 \times 10^{-2}$ | $\nu_5 + \nu_9$ | 7 7 1   | 8 8 1   | 2496.9971 | 0.28 | $0.36 \times 10^{-2}$  | $\nu_3 + \nu_4$ | 10 8 2                | 10 5 5          |       |       |
| 2493.0468 | 4.10 | $-0.50 \times 10^{-2}$ | $\nu_5 + \nu_9$ | 7 7 0   | 8 8 0   | 2496.9971 | 0.28 | $-0.37 \times 10^{-2}$ | $\nu_5 + \nu_9$ | 11 2 10               | 12 1 12         |       |       |
| 2493.0773 | 0.09 | $-0.22 \times 10^{-2}$ | $2\nu_9$        | 12 2 11 | 11 3 8  | 2497.0937 | 0.18 | $0.54 \times 10^{-2}$  | $\nu_3 + \nu_4$ | 6 1 6                 | 5 2 3           |       |       |
| 2493.1146 | 0.09 | $0.24 \times 10^{-2}$  | $2\nu_9$        | 9 4 5   | 8 7 2   | 2497.1174 | 0.37 | $0.52 \times 10^{-2}$  | $\nu_3 + \nu_4$ | 11 5 6                | 11 2 9          |       |       |
| 2493.1284 | 0.16 | $-0.15 \times 10^{-2}$ | $\nu_3 + \nu_4$ | 7 7 1   | 7 4 4   | 2497.1174 | 0.37 | $-0.48 \times 10^{-2}$ | $\nu_5 + \nu_9$ | 10 5 6                | 11 4 8          |       |       |
| 2493.2459 | 0.25 | $-0.56 \times 10^{-3}$ | $\nu_3 + \nu_4$ | 5 1 5   | 4 2 2   | 2497.1642 | 0.22 | $0.86 \times 10^{-3}$  | $\nu_3 + \nu_4$ | 7 2 5                 | 6 5 2           |       |       |
| 2493.2459 | 0.25 | $0.45 \times 10^{-2}$  | $\nu_5 + \nu_9$ | 12 10 3 | 13 9 5  | 2497.1950 | 0.33 | $0.60 \times 10^{-4}$  | $\nu_5 + \nu_9$ | 10 6 5                | 11 5 7          |       |       |
| 2493.4645 | 0.12 | $0.11 \times 10^{-2}$  | $\nu_3 + \nu_4$ | 8 7 2   | 8 4 5   | 2497.2552 | 0.07 | $-0.37 \times 10^{-2}$ | $2\nu_9$        | 11 3 8                | 11 0 11         |       |       |
| 2493.5541 | 0.69 | $-0.12 \times 10^{-3}$ | $\nu_5 + \nu_9$ | 10 4 6  | 11 3 8  | 2497.2861 | 0.12 | $0.54 \times 10^{-3}$  | $2\nu_9$        | 5 4 1                 | 4 3 2           |       |       |
| 2493.6027 | 0.56 | $-0.32 \times 10^{-2}$ | $2\nu_9$        | 8 2 7   | 7 3 4   | 2497.4160 | 0.29 | $-0.16 \times 10^{-3}$ | $\nu_5 + \nu_7$ | 12 3 9                | 11 1 10         |       |       |
| 2493.7231 | 0.16 | $0.39 \times 10^{-3}$  | $\nu_3 + \nu_4$ | 6 1 5   | 5 4 2   | 2497.4532 | 0.45 | $-0.22 \times 10^{-3}$ | $\nu_5 + \nu_7$ | 12 2 10               | 11 2 9          |       |       |
| 2493.7654 | 0.12 | $0.41 \times 10^{-2}$  | $\nu_3 + \nu_4$ | 9 4 5   | 9 1 8   | 2497.4687 | 0.25 | $-0.29 \times 10^{-2}$ | $\nu_5 + \nu_7$ | 12 2 11               | 11 2 10         |       |       |
| 2493.9676 | 0.12 | $-0.24 \times 10^{-2}$ | $\nu_5 + \nu_9$ | 6 0 6   | 7 3 4   | 2497.5240 | 2.79 | $0.15 \times 10^{-2}$  | $\nu_3 + \nu_4$ | 4 3 2                 | 3 2 1           |       |       |
| 2494.0019 | 0.16 | $-0.16 \times 10^{-2}$ | $2\nu_9$        | 8 6 3   | 7 7 0   | 2497.5472 | 0.12 | $0.46 \times 10^{-2}$  | $\nu_3 + \nu_4$ | 9 8 1                 | 9 5 4           |       |       |
| 2494.0213 | 1.98 | $-0.21 \times 10^{-2}$ | $\nu_3 + \nu_4$ | 4 1 3   | 3 2 2   | 2497.5723 | 0.32 | $-0.34 \times 10^{-2}$ | $\nu_5 + \nu_9$ | 6 1 5                 | 7 4 3           |       |       |
| 2494.0426 | 2.79 | $0.10 \times 10^{-2}$  | $\nu_3 + \nu_4$ | 6 0 6   | 5 3 3   | 2497.5723 | 0.32 | $0.42 \times 10^{-2}$  | $\nu_5 + \nu_9$ | 11 9 2                | 12 8 4          |       |       |
| 2494.0426 | 2.79 | $-0.27 \times 10^{-2}$ | $\nu_5 + \nu_9$ | 8 3 5   | 9 4 5   | 2497.7602 | 0.26 | $0.30 \times 10^{-2}$  | $\nu_3 + \nu_4$ | 6 4 2                 | 5 5 1           |       |       |
| 2494.0754 | 2.72 | $-0.58 \times 10^{-3}$ | $\nu_3 + \nu_4$ | 4 0 4   | 3 1 3   | 2497.7981 | 4.48 | $-0.19 \times 10^{-2}$ | $\nu_3 + \nu_4$ | 4 4 1                 | 3 3 0           |       |       |
| 2494.1011 | 0.11 | $-0.30 \times 10^{-2}$ | $\nu_5 + \nu_7$ | 12 10 2 | 11 10 1 | 2497.8418 | 0.16 | $0.20 \times 10^{-2}$  | $\nu_5 + \nu_7$ | 8 5 4                 | 7 3 5           |       |       |
| 2494.1633 | 0.50 | $-0.55 \times 10^{-2}$ | $\nu_3 + \nu_4$ | 9 7 3   | 9 4 6   | 2497.8860 | 2.98 | $-0.13 \times 10^{-2}$ | $\nu_3 + \nu_4$ | 4 4 0                 | 3 3 1           |       |       |
| 2494.1964 | 0.11 | $-0.17 \times 10^{-3}$ | $\nu_5 + \nu_9$ | 13 13 0 | 14 12 2 | 2497.9186 | 2.57 | $0.44 \times 10^{-2}$  | $\nu_5 + \nu_9$ | 7 4 4                 | 8 5 4           |       |       |
| 2494.1964 | 0.11 | $-0.17 \times 10^{-3}$ | $\nu_5 + \nu_9$ | 13 13 1 | 14 12 3 | 2497.9885 | 0.09 | $0.14 \times 10^{-2}$  | $\nu_5 + \nu_7$ | 9 2 7                 | 8 0 8           |       |       |
| 2494.2851 | 2.69 | $0.49 \times 10^{-2}$  | $\nu_3 + \nu_4$ | 4 1 4   | 3 0 3   | 2498.0715 | 0.11 | $0.47 \times 10^{-2}$  | $\nu_3 + \nu_4$ | 8 8 1                 | 8 5 4           |       |       |
| 2494.3736 | 1.31 | $-0.33 \times 10^{-2}$ | $2\nu_9$        | 4 3 2   | 3 0 3   | 2498.0927 | 0.18 | $0.63 \times 10^{-2}$  | $\nu_3 + \nu_4$ | 10 4 6                | 10 1 9          |       |       |
| 2494.5522 | 0.10 | $0.21 \times 10^{-2}$  | $\nu_5 + \nu_9$ | 5 3 2   | 6 6 0   | 2498.1063 | 0.34 | $-0.37 \times 10^{-2}$ | $\nu_5 + \nu_7$ | 12 3 10               | 11 3 9          |       |       |
| 2494.5907 | 0.53 | $0.37 \times 10^{-2}$  | $\nu_5 + \nu_9$ | 10 6 4  | 11 5 6  | 2498.1212 | 2.15 | $-0.31 \times 10^{-2}$ | $\nu_5 + \nu_9$ | 7 2 6                 | 8 3 6           |       |       |
| 2494.6410 | 0.25 | $-0.53 \times 10^{-2}$ | $\nu_5 + \nu_7$ | 8 5 3   | 7 3 4   | 2498.3289 | 0.10 | $-0.29 \times 10^{-2}$ | $\nu_3 + \nu_4$ | 10 5 6                | 10 2 9          |       |       |
| 2494.6739 | 4.09 | $-0.33 \times 10^{-2}$ | $\nu_5 + \nu_9$ | 7 6 1   | 8 7 1   | 2498.4255 | 0.10 | $0.20 \times 10^{-2}$  | $\nu_5 + \nu_9$ | 12 12 1               | 13 11 3         |       |       |
| 2494.6739 | 4.09 | $-0.11 \times 10^{-3}$ | $\nu_5 + \nu_9$ | 7 6 2   | 8 7 2   | 2498.4255 | 0.10 | $0.20 \times 10^{-2}$  | $\nu_5 + \nu_9$ | 12 12 0               | 13 11 2         |       |       |
| 2494.6975 | 0.29 | $0.14 \times 10^{-2}$  | $\nu_5 + \nu_9$ | 11 2 9  | 12 1 11 | 2498.4627 | 0.13 | $0.55 \times 10^{-3}$  | $\nu_3 + \nu_4$ | 10 8 3                | 10 5 6          |       |       |
| 2494.7195 | 0.11 | $0.20 \times 10^{-2}$  | $\nu_5 + \nu_7$ | 6 6 1   | 5 4 2   | 2498.6373 | 3.41 | $-0.52 \times 10^{-3}$ | $\nu_5 + \nu_9$ | 7 3 5                 | 8 4 5           |       |       |
| 2494.8004 | 0.47 | $-0.32 \times 10^{-2}$ | $\nu_3 + \nu_4$ | 5 2 4   | 4 3 1   | 2498.6373 | 3.41 | $0.59 \times 10^{-3}$  | $\nu_5 + \nu_9$ | 9 4 5                 | 10 3 7          |       |       |
| 2494.8315 | 0.27 | $-0.37 \times 10^{-2}$ | $\nu_5 + \nu_9$ | 11 8 4  | 12 7 6  | 2498.6922 | 1.63 | $-0.40 \times 10^{-2}$ | $\nu_5 + \nu_9$ | 7 1 6                 | 8 2 6           |       |       |
| 2494.8758 | 0.08 | $-0.63 \times 10^{-2}$ | $\nu_3 + \nu_4$ | 14 2 13 | 14 1 14 | 2498.8068 | 0.41 | $-0.63 \times 10^{-3}$ | $\nu_5 + \nu_9$ | 10 7 3                | 11 6 5          |       |       |
| 2494.9055 | 0.06 | $-0.24 \times 10^{-2}$ | $2\nu_9$        | 6 3 3   | 5 4 2   | 2498.8614 | 0.19 | $0.28 \times 10^{-2}$  | $2\nu_9$        | 5 3 2                 | 4 2 3           |       |       |
| 2494.9344 | 0.35 | $0.80 \times 10^{-3}$  | $\nu_5 + \nu_9$ | 11 3 9  | 12 2 11 | 2499.0159 | 1.10 | $0.26 \times 10^{-2}$  | $\nu_3 + \nu_4$ | 4 3 1                 | 3 2 2           |       |       |
| 2495.0972 | 0.38 | $0.15 \times 10^{-2}$  | $\nu_3 + \nu_4$ | 5 3 2   | 4 4 1   | 2499.0378 | 0.30 | $-0.43 \times 10^{-2}$ | $\nu_3 + \nu_4$ | 7 1 6                 | 6 4 3           |       |       |
| 2495.1771 | 0.29 | $0.19 \times 10^{-3}$  | $\nu_3 + \nu_4$ | 8 4 5   | 8 1 8   | 2499.1396 | 0.31 | $0.29 \times 10^{-2}$  | $\nu_5 + \nu_7$ | 12 4 9                | 11 4 8          |       |       |
| 2495.2072 | 0.21 | $-0.63 \times 10^{-3}$ | $2\nu_9$        | 5 3 3   | 4 2 2   | 2499.2365 | 0.09 | $0.43 \times 10^{-2}$  | $\nu_3 + \nu_4$ | 11 6 5                | 10 9 2          |       |       |
| 2495.2531 | 0.18 | $-0.61 \times 10^{-3}$ | $\nu_3 + \nu_4$ | 3 3 1   | 2 0 2   | 2499.2598 | 0.08 | $-0.32 \times 10^{-2}$ | $\nu_5 + \nu_9$ | 5 1 5                 | 6 4 3           |       |       |
| 2495.2911 | 0.15 | $0.23 \times 10^{-2}$  | $\nu_3 + \nu_4$ | 10 6 5  | 10 3 8  | 2499.3158 | 0.33 | $-0.10 \times 10^{-2}$ | $\nu_5 + \nu_9$ | 10 7 4                | 11 6 6          |       |       |
| 2495.3774 | 0.23 | $-0.30 \times 10^{-4}$ | $\nu_3 + \nu_4$ | 10 7 4  | 10 4 7  | 2499.3306 | 1.00 | $0.21 \times 10^{-2}$  | $2\nu_9$        | 8 0 8                 | 7 1 7           |       |       |

| (I)       | (II) | (III)                  | (IV)            | (V)     | (VI)    | (I)       | (II) | (III)                  | (IV)            | (V)     | (VI)    |
|-----------|------|------------------------|-----------------|---------|---------|-----------|------|------------------------|-----------------|---------|---------|
| 2499.3306 | 1.00 | $-0.50 \times 10^{-3}$ | $2\nu_9$        | 8 1 8   | 7 0 7   | 2503.8019 | 0.34 | $-0.31 \times 10^{-2}$ | $\nu_5 + \nu_7$ | 13 2 11 | 12 2 10 |
| 2499.3809 | 1.60 | $0.36 \times 10^{-3}$  | $\nu_3 + \nu_4$ | 5 2 3   | 4 3 2   | 2503.8316 | 1.74 | $0.94 \times 10^{-3}$  | $\nu_3 + \nu_4$ | 5 3 3   | 4 2 2   |
| 2499.4177 | 0.48 | $0.49 \times 10^{-2}$  | $\nu_5 + \nu_7$ | 12 5 7  | 11 5 6  | 2504.0157 | 0.23 | $-0.68 \times 10^{-2}$ | $\nu_3 + \nu_4$ | 8 1 7   | 7 4 4   |
| 2499.5567 | 0.51 | $0.65 \times 10^{-3}$  | $\nu_3 + \nu_4$ | 7 5 3   | 6 6 0   | 2504.0412 | 0.47 | $0.30 \times 10^{-2}$  | $\nu_5 + \nu_9$ | 9 6 4   | 10 5 6  |
| 2499.5567 | 0.51 | $0.47 \times 10^{-3}$  | $\nu_3 + \nu_4$ | 8 3 5   | 7 6 2   | 2504.4727 | 1.14 | $0.57 \times 10^{-2}$  | $\nu_5 + \nu_9$ | 8 4 4   | 9 3 6   |
| 2499.5567 | 0.51 | $0.47 \times 10^{-3}$  | $2\nu_9$        | 8 5 3   | 7 6 2   | 2504.5741 | 0.42 | $-0.43 \times 10^{-2}$ | $\nu_3 + \nu_4$ | 7 2 6   | 6 3 3   |
| 2499.6156 | 0.81 | $-0.30 \times 10^{-4}$ | $\nu_3 + \nu_4$ | 6 3 4   | 5 4 1   | 2504.6246 | 0.23 | $-0.24 \times 10^{-2}$ | $\nu_5 + \nu_9$ | 10 9 2  | 11 8 4  |
| 2499.9678 | 0.15 | $-0.55 \times 10^{-2}$ | $\nu_5 + \nu_7$ | 7 6 1   | 6 4 2   | 2504.6246 | 0.23 | $-0.23 \times 10^{-3}$ | $\nu_5 + \nu_9$ | 10 9 1  | 11 8 3  |
| 2500.0466 | 0.67 | $-0.39 \times 10^{-2}$ | $\nu_3 + \nu_4$ | 6 2 5   | 5 3 2   | 2504.7929 | 2.54 | $0.12 \times 10^{-2}$  | $\nu_3 + \nu_4$ | 5 4 2   | 4 3 1   |
| 2500.0678 | 0.51 | $-0.30 \times 10^{-2}$ | $\nu_5 + \nu_9$ | 10 2 8  | 11 1 10 | 2504.8214 | 0.14 | $0.47 \times 10^{-2}$  | $\nu_5 + \nu_7$ | 8 6 2   | 7 4 3   |
| 2500.1878 | 0.21 | $0.11 \times 10^{-2}$  | $\nu_5 + \nu_7$ | 7 6 2   | 6 4 3   | 2504.8509 | 3.67 | $-0.16 \times 10^{-2}$ | $\nu_3 + \nu_4$ | 4 4 1   | 3 1 2   |
| 2500.2273 | 0.17 | $0.13 \times 10^{-2}$  | $\nu_5 + \nu_9$ | 11 10 2 | 12 9 4  | 2504.8509 | 3.67 | $-0.12 \times 10^{-2}$ | $\nu_3 + \nu_4$ | 5 5 1   | 4 4 0   |
| 2500.2273 | 0.17 | $0.17 \times 10^{-2}$  | $\nu_5 + \nu_9$ | 11 10 1 | 12 9 3  | 2504.8720 | 4.96 | $-0.16 \times 10^{-2}$ | $\nu_3 + \nu_4$ | 5 5 0   | 4 4 1   |
| 2500.2564 | 0.41 | $-0.38 \times 10^{-2}$ | $\nu_3 + \nu_4$ | 7 5 2   | 6 6 1   | 2504.8720 | 4.96 | $-0.50 \times 10^{-2}$ | $\nu_5 + \nu_9$ | 6 4 3   | 7 5 3   |
| 2500.2564 | 0.41 | $-0.16 \times 10^{-2}$ | $\nu_5 + \nu_9$ | 10 3 8  | 11 2 10 | 2504.8996 | 0.32 | $-0.24 \times 10^{-2}$ | $2\nu_9$        | 8 1 7   | 7 2 6   |
| 2500.4260 | 5.23 | $0.67 \times 10^{-2}$  | $\nu_3 + \nu_4$ | 5 0 5   | 4 1 4   | 2505.1763 | 3.19 | $0.63 \times 10^{-2}$  | $\nu_5 + \nu_9$ | 6 4 2   | 7 5 2   |
| 2500.5185 | 3.71 | $0.27 \times 10^{-2}$  | $\nu_3 + \nu_4$ | 5 1 5   | 4 0 4   | 2505.2635 | 1.30 | $-0.23 \times 10^{-2}$ | $\nu_5 + \nu_9$ | 6 1 6   | 7 2 6   |
| 2500.5185 | 3.71 | $0.41 \times 10^{-2}$  | $\nu_5 + \nu_7$ | 9 4 6   | 8 2 7   | 2505.3763 | 1.77 | $-0.27 \times 10^{-2}$ | $\nu_5 + \nu_9$ | 6 0 6   | 7 1 6   |
| 2500.5435 | 3.10 | $-0.55 \times 10^{-2}$ | $\nu_3 + \nu_4$ | 5 1 4   | 4 2 3   | 2505.4066 | 2.56 | $0.16 \times 10^{-2}$  | $\nu_3 + \nu_4$ | 5 4 1   | 4 3 2   |
| 2500.5435 | 3.10 | $0.15 \times 10^{-2}$  | $2\nu_9$        | 7 1 6   | 6 2 5   | 2505.4333 | 0.57 | $-0.13 \times 10^{-2}$ | $2\nu_9$        | 10 1 10 | 9 0 9   |
| 2500.6380 | 0.13 | $0.68 \times 10^{-2}$  | $\nu_3 + \nu_4$ | 7 1 7   | 6 2 4   | 2505.5029 | 0.17 | $0.18 \times 10^{-2}$  | $\nu_5 + \nu_7$ | 8 6 3   | 7 4 4   |
| 2500.7246 | 0.47 | $-0.50 \times 10^{-2}$ | $\nu_5 + \nu_7$ | 13 4 9  | 12 4 8  | 2505.6202 | 0.52 | $-0.34 \times 10^{-2}$ | $\nu_5 + \nu_9$ | 9 3 7   | 10 2 9  |
| 2500.8483 | 0.39 | $-0.38 \times 10^{-2}$ | $2\nu_9$        | 7 2 6   | 6 1 5   | 2505.8034 | 0.76 | $-0.74 \times 10^{-3}$ | $\nu_3 + \nu_4$ | 7 3 5   | 6 4 2   |
| 2500.8975 | 2.20 | $-0.47 \times 10^{-2}$ | $\nu_5 + \nu_9$ | 7 2 5   | 8 3 5   | 2505.8873 | 0.15 | $-0.25 \times 10^{-2}$ | $\nu_5 + \nu_7$ | 12 6 7  | 11 6 6  |
| 2500.9402 | 0.25 | $-0.11 \times 10^{-2}$ | $2\nu_9$        | 6 3 4   | 5 2 3   | 2505.9586 | 0.14 | $-0.33 \times 10^{-2}$ | $\nu_5 + \nu_9$ | 5 1 4   | 6 4 2   |
| 2500.9617 | 0.21 | $0.93 \times 10^{-3}$  | $\nu_5 + \nu_7$ | 11 6 5  | 10 6 4  | 2506.0231 | 0.12 | $-0.15 \times 10^{-3}$ | $\nu_5 + \nu_7$ | 11 7 4  | 10 7 3  |
| 2501.0919 | 2.37 | $0.68 \times 10^{-3}$  | $\nu_5 + \nu_9$ | 7 3 4   | 8 4 4   | 2506.0941 | 2.32 | $0.14 \times 10^{-2}$  | $\nu_5 + \nu_9$ | 6 3 4   | 7 4 4   |
| 2501.1340 | 0.32 | $-0.60 \times 10^{-4}$ | $\nu_5 + \nu_7$ | 11 6 6  | 10 6 5  | 2506.0941 | 2.32 | $0.37 \times 10^{-2}$  | $2\nu_9$        | 7 3 5   | 6 2 4   |
| 2501.1825 | 0.12 | $-0.40 \times 10^{-2}$ | $\nu_5 + \nu_7$ | 10 7 4  | 9 7 3   | 2506.1672 | 1.99 | $-0.26 \times 10^{-2}$ | $\nu_5 + \nu_9$ | 6 2 5   | 7 3 5   |
| 2501.3538 | 0.23 | $0.48 \times 10^{-2}$  | $\nu_5 + \nu_7$ | 10 7 3  | 9 7 2   | 2506.2072 | 0.10 | $0.15 \times 10^{-2}$  | $2\nu_9$        | 12 3 10 | 11 4 7  |
| 2501.3885 | 0.19 | $0.12 \times 10^{-2}$  | $\nu_3 + \nu_4$ | 4 2 2   | 3 1 3   | 2506.2652 | 0.26 | $-0.16 \times 10^{-2}$ | $\nu_5 + \nu_9$ | 9 7 2   | 10 6 4  |
| 2501.5155 | 4.49 | $-0.63 \times 10^{-2}$ | $\nu_5 + \nu_9$ | 6 6 1   | 7 7 1   | 2506.4430 | 0.36 | $-0.12 \times 10^{-2}$ | $\nu_5 + \nu_9$ | 9 7 3   | 10 6 5  |
| 2501.5155 | 4.49 | $-0.65 \times 10^{-2}$ | $\nu_5 + \nu_9$ | 6 6 0   | 7 7 0   | 2506.4693 | 0.32 | $0.42 \times 10^{-2}$  | $\nu_3 + \nu_4$ | 9 3 6   | 8 6 3   |
| 2501.6073 | 0.10 | $-0.47 \times 10^{-2}$ | $\nu_5 + \nu_7$ | 9 8 1   | 8 8 0   | 2506.4693 | 0.32 | $0.42 \times 10^{-2}$  | $2\nu_9$        | 9 5 4   | 8 6 3   |
| 2501.6073 | 0.10 | $-0.51 \times 10^{-2}$ | $\nu_5 + \nu_7$ | 9 8 2   | 8 8 1   | 2506.5033 | 0.13 | $-0.18 \times 10^{-3}$ | $\nu_3 + \nu_4$ | 9 7 2   | 8 8 1   |
| 2501.6515 | 0.26 | $-0.43 \times 10^{-2}$ | $\nu_5 + \nu_7$ | 12 5 8  | 11 5 7  | 2506.5033 | 0.13 | $-0.18 \times 10^{-3}$ | $2\nu_9$        | 9 9 0   | 8 8 1   |
| 2501.6718 | 0.31 | $-0.13 \times 10^{-2}$ | $2\nu_9$        | 6 6 1   | 5 5 0   | 2506.5248 | 0.16 | $0.13 \times 10^{-2}$  | $2\nu_9$        | 11 3 9  | 10 4 6  |
| 2501.6718 | 0.31 | $-0.47 \times 10^{-2}$ | $2\nu_9$        | 6 6 0   | 5 5 1   | 2506.5836 | 1.86 | $0.74 \times 10^{-3}$  | $\nu_3 + \nu_4$ | 6 2 4   | 5 3 3   |
| 2501.7361 | 2.07 | $-0.36 \times 10^{-2}$ | $\nu_3 + \nu_4$ | 5 2 4   | 4 1 3   | 2506.6288 | 0.64 | $0.33 \times 10^{-2}$  | $\nu_3 + \nu_4$ | 7 4 3   | 6 5 2   |
| 2501.9283 | 0.25 | $-0.44 \times 10^{-2}$ | $\nu_5 + \nu_9$ | 10 8 2  | 11 7 4  | 2506.6397 | 0.74 | $-0.36 \times 10^{-2}$ | $2\nu_9$        | 7 7 1   | 6 6 0   |
| 2501.9721 | 0.21 | $-0.49 \times 10^{-2}$ | $\nu_5 + \nu_9$ | 10 8 3  | 11 7 5  | 2506.6397 | 0.74 | $-0.45 \times 10^{-2}$ | $2\nu_9$        | 7 7 0   | 6 6 1   |
| 2502.2807 | 0.26 | $0.39 \times 10^{-2}$  | $\nu_5 + \nu_9$ | 10 2 9  | 11 1 11 | 2506.6716 | 0.09 | $0.41 \times 10^{-2}$  | $\nu_5 + \nu_7$ | 10 8 2  | 9 8 1   |
| 2502.3819 | 0.20 | $0.32 \times 10^{-2}$  | $2\nu_9$        | 9 6 4   | 8 7 1   | 2506.6716 | 0.09 | $0.94 \times 10^{-3}$  | $\nu_5 + \nu_7$ | 10 8 3  | 9 8 2   |
| 2502.4531 | 0.34 | $-0.18 \times 10^{-2}$ | $\nu_5 + \nu_7$ | 13 1 12 | 12 3 9  | 2506.8375 | 0.83 | $-0.24 \times 10^{-2}$ | $\nu_5 + \nu_9$ | 8 3 5   | 9 2 7   |
| 2502.5699 | 0.82 | $0.18 \times 10^{-2}$  | $2\nu_9$        | 9 0 9   | 8 1 8   | 2506.8891 | 2.58 | $0.80 \times 10^{-4}$  | $\nu_3 + \nu_4$ | 6 1 5   | 5 2 4   |
| 2502.5699 | 0.82 | $0.28 \times 10^{-2}$  | $2\nu_9$        | 9 1 9   | 8 0 8   | 2506.9322 | 3.62 | $0.53 \times 10^{-2}$  | $\nu_3 + \nu_4$ | 6 0 6   | 5 1 5   |
| 2502.6460 | 0.37 | $0.44 \times 10^{-2}$  | $\nu_5 + \nu_9$ | 9 6 3   | 10 5 5  | 2506.9639 | 3.42 | $0.39 \times 10^{-2}$  | $\nu_3 + \nu_4$ | 6 1 6   | 5 0 5   |
| 2502.8822 | 0.14 | $-0.36 \times 10^{-3}$ | $\nu_3 + \nu_4$ | 8 6 3   | 7 7 0   | 2507.0520 | 0.38 | $0.14 \times 10^{-2}$  | $\nu_3 + \nu_4$ | 8 5 4   | 7 6 1   |
| 2502.9332 | 0.09 | $0.20 \times 10^{-2}$  | $\nu_3 + \nu_4$ | 4 3 2   | 3 0 3   | 2507.2112 | 2.92 | $-0.36 \times 10^{-2}$ | $\nu_5 + \nu_7$ | 14 5 9  | 13 5 8  |
| 2502.9498 | 0.10 | $0.45 \times 10^{-2}$  | $2\nu_9$        | 9 6 3   | 8 7 2   | 2507.2112 | 2.92 | $-0.49 \times 10^{-2}$ | $\nu_5 + \nu_9$ | 6 1 5   | 7 2 5   |
| 2502.9750 | 0.12 | $0.43 \times 10^{-3}$  | $\nu_3 + \nu_4$ | 10 9 1  | 10 6 4  | 2507.5353 | 3.39 | $-0.44 \times 10^{-2}$ | $\nu_3 + \nu_4$ | 6 2 5   | 5 1 4   |
| 2503.0432 | 0.65 | $0.34 \times 10^{-3}$  | $\nu_5 + \nu_9$ | 9 5 5   | 10 4 7  | 2507.5353 | 3.39 | $-0.58 \times 10^{-2}$ | $2\nu_9$        | 9 5 5   | 8 6 2   |
| 2503.1112 | 0.16 | $0.31 \times 10^{-2}$  | $\nu_5 + \nu_7$ | 10 5 5  | 9 3 6   | 2507.6159 | 0.65 | $0.61 \times 10^{-2}$  | $\nu_3 + \nu_4$ | 4 4 0   | 3 1 3   |
| 2503.1564 | 0.17 | $-0.16 \times 10^{-2}$ | $\nu_3 + \nu_4$ | 8 6 2   | 7 7 1   | 2507.6159 | 0.65 | $0.12 \times 10^{-2}$  | $\nu_3 + \nu_4$ | 5 3 2   | 4 2 3   |
| 2503.1564 | 0.17 | $0.20 \times 10^{-4}$  | $\nu_3 + \nu_4$ | 10 9 2  | 10 6 5  | 2507.6750 | 3.37 | $0.29 \times 10^{-2}$  | $\nu_5 + \nu_9$ | 6 3 3   | 7 4 3   |
| 2503.1973 | 2.92 | $0.23 \times 10^{-2}$  | $\nu_5 + \nu_9$ | 6 5 2   | 7 6 2   | 2507.7348 | 0.34 | $0.11 \times 10^{-2}$  | $\nu_5 + \nu_9$ | 9 2 8   | 10 1 10 |
| 2503.2130 | 3.06 | $0.92 \times 10^{-3}$  | $\nu_5 + \nu_7$ | 13 5 8  | 12 5 7  | 2507.9306 | 0.14 | $-0.12 \times 10^{-2}$ | $\nu_5 + \nu_7$ | 11 5 6  | 10 3 7  |
| 2503.2130 | 3.06 | $0.24 \times 10^{-2}$  | $\nu_5 + \nu_9$ | 6 5 1   | 7 6 1   | 2507.9683 | 0.39 | $0.24 \times 10^{-2}$  | $2\nu_9$        | 11 0 11 | 10 1 10 |
| 2503.2298 | 0.29 | $0.21 \times 10^{-2}$  | $\nu_3 + \nu_4$ | 8 2 6   | 7 5 3   | 2507.9683 | 0.39 | $0.26 \times 10^{-2}$  | $2\nu_9$        | 11 1 11 | 10 0 10 |
| 2503.5137 | 0.64 | $-0.67 \times 10^{-2}$ | $\nu_3 + \nu_4$ | 6 3 3   | 5 4 2   | 2508.0179 | 0.17 | $-0.17 \times 10^{-2}$ | $\nu_5 + \nu_9$ | 9 1 8   | 10 0 10 |
| 2503.5673 | 0.46 | $0.32 \times 10^{-2}$  | $\nu_3 + \nu_4$ | 7 4 4   | 6 5 1   | 2508.1460 | 0.10 | $0.28 \times 10^{-2}$  | $\nu_3 + \nu_4$ | 11 10 1 | 11 7 4  |
| 2503.6096 | 0.15 | $-0.55 \times 10^{-2}$ | $\nu_3 + \nu_4$ | 10 4 7  | 10 1 10 | 2508.1983 | 0.07 | $-0.49 \times 10^{-2}$ | $\nu_3 + \nu_4$ | 10 10 0 | 10 7 3  |
| 2503.6367 | 0.18 | $0.37 \times 10^{-2}$  | $\nu_5 + \nu_7$ | 13 2 12 | 12 2 11 | 2508.2304 | 0.08 | $-0.18 \times 10^{-3}$ | $\nu_5 + \nu_7$ | 10 4 7  | 9 2 8   |
| 2503.6821 | 0.09 | $0.30 \times 10^{-2}$  | $\nu_3 + \nu_4$ | 10 3 7  | 10 0 10 | 2508.3655 | 0.08 | $-0.43 \times 10^{-2}$ | $\nu_5 + \nu_9$ | 4 1 4   | 5 4 2   |
| 2503.7111 | 0.64 | $-0.21 \times 10^{-2}$ | $\nu_5 + \nu_9$ | 9 4 6   | 10 3 8  | 2508.3655 | 0.08 | $0.20 \times 10^{-2}$  | $2\nu_9$        | 5 4 1   | 4 1 4   |
| 2503.7875 | 0.24 | $-0.29 \times 10^{-2}$ | $2\nu_9$        | 7 2 5   | 6 3 4   | 2508.4877 | 0.36 | $-0.41 \times 10^{-2}$ | $\nu_3 + \nu_4$ | 8 2 7   | 7 3 4   |
| 2503.7875 | 0.24 | $0.13 \times 10^{-3}$  | $2\nu_9$        | 6 4 3   | 5 3 2   | 2508.6048 | 0.16 | $-0.20 \times 10^{-2}$ | $\nu_5 + \nu_7$ | 14 0 14 | 13 0 13 |



| (I)       | (II) | (III)                  | (IV)            | (V)     | (VI)    | (I)       | (II) | (III)                  | (IV)            | (V)     | (VI)    |
|-----------|------|------------------------|-----------------|---------|---------|-----------|------|------------------------|-----------------|---------|---------|
| 2519.6172 | 0.22 | $-0.20 \times 10^{-2}$ | $\nu_3 + \nu_4$ | 6 3 4   | 5 0 5   | 2526.0689 | 2.02 | $0.36 \times 10^{-2}$  | $\nu_3 + \nu_4$ | 9 3 6   | 8 4 5   |
| 2519.6172 | 0.22 | $-0.54 \times 10^{-2}$ | $\nu_5 + \nu_7$ | 9 7 3   | 8 5 4   | 2526.0689 | 2.02 | $-0.41 \times 10^{-2}$ | $\nu_5 + \nu_7$ | 13 12 2 | 12 12 1 |
| 2519.7389 | 2.32 | $0.18 \times 10^{-2}$  | $\nu_3 + \nu_4$ | 8 2 6   | 7 3 5   | 2526.0689 | 2.02 | $0.36 \times 10^{-2}$  | $2\nu_9$        | 9 5 4   | 8 4 5   |
| 2519.7700 | 3.09 | $-0.69 \times 10^{-2}$ | $\nu_3 + \nu_4$ | 8 1 7   | 7 2 6   | 2526.2059 | 2.79 | $0.18 \times 10^{-2}$  | $\nu_3 + \nu_4$ | 9 2 7   | 8 3 6   |
| 2519.7905 | 5.18 | $0.64 \times 10^{-3}$  | $\nu_3 + \nu_4$ | 7 7 0   | 6 6 1   | 2526.2059 | 2.79 | $0.16 \times 10^{-2}$  | $2\nu_9$        | 7 5 2   | 6 2 5   |
| 2519.7905 | 5.18 | $0.17 \times 10^{-2}$  | $\nu_3 + \nu_4$ | 7 7 1   | 6 6 0   | 2526.5032 | 2.66 | $-0.49 \times 10^{-2}$ | $\nu_3 + \nu_4$ | 9 2 8   | 8 1 7   |
| 2519.8774 | 0.21 | $-0.39 \times 10^{-2}$ | $\nu_5 + \nu_7$ | 15 6 10 | 14 6 9  | 2526.6069 | 0.24 | $-0.32 \times 10^{-2}$ | $\nu_5 + \nu_7$ | 12 2 10 | 11 0 11 |
| 2519.8959 | 3.46 | $-0.49 \times 10^{-2}$ | $\nu_3 + \nu_4$ | 8 2 7   | 7 1 6   | 2526.7231 | 0.12 | $-0.31 \times 10^{-2}$ | $2\nu_9$        | 8 3 5   | 7 2 6   |
| 2519.9446 | 0.10 | $0.31 \times 10^{-2}$  | $\nu_5 + \nu_9$ | 3 1 2   | 4 4 0   | 2526.7874 | 1.86 | $-0.91 \times 10^{-3}$ | $\nu_3 + \nu_4$ | 8 6 2   | 7 5 3   |
| 2519.9777 | 1.77 | $-0.10 \times 10^{-2}$ | $\nu_3 + \nu_4$ | 7 5 2   | 6 4 3   | 2526.7986 | 2.99 | $0.12 \times 10^{-2}$  | $\nu_3 + \nu_4$ | 8 7 2   | 7 6 1   |
| 2520.1271 | 0.72 | $-0.24 \times 10^{-2}$ | $\nu_5 + \nu_9$ | 6 2 4   | 7 1 6   | 2526.8131 | 1.70 | $0.68 \times 10^{-3}$  | $\nu_3 + \nu_4$ | 8 7 1   | 7 6 2   |
| 2520.2681 | 2.88 | $0.26 \times 10^{-2}$  | $\nu_5 + \nu_9$ | 4 3 2   | 5 4 2   | 2526.8555 | 1.76 | $0.15 \times 10^{-2}$  | $\nu_3 + \nu_4$ | 9 3 7   | 8 2 6   |
| 2520.2877 | 0.46 | $0.19 \times 10^{-2}$  | $\nu_3 + \nu_4$ | 10 3 8  | 9 4 5   | 2527.1086 | 3.80 | $0.60 \times 10^{-3}$  | $\nu_5 + \nu_9$ | 3 3 1   | 4 4 1   |
| 2520.3090 | 0.13 | $0.26 \times 10^{-2}$  | $\nu_5 + \nu_9$ | 12 1 12 | 12 2 10 | 2527.1497 | 2.91 | $0.13 \times 10^{-2}$  | $\nu_5 + \nu_9$ | 3 3 0   | 4 4 0   |
| 2520.4366 | 0.17 | $-0.16 \times 10^{-2}$ | $2\nu_9$        | 13 2 12 | 12 1 11 | 2527.1897 | 0.14 | $0.32 \times 10^{-2}$  | $\nu_5 + \nu_7$ | 13 10 3 | 12 10 2 |
| 2520.4366 | 0.17 | $-0.78 \times 10^{-3}$ | $2\nu_9$        | 13 1 12 | 12 2 11 | 2527.1897 | 0.14 | $-0.14 \times 10^{-3}$ | $\nu_5 + \nu_7$ | 13 10 4 | 12 10 3 |
| 2520.5143 | 2.75 | $0.27 \times 10^{-2}$  | $\nu_5 + \nu_9$ | 4 3 1   | 5 4 1   | 2527.2082 | 0.10 | $0.39 \times 10^{-2}$  | $\nu_5 + \nu_9$ | 12 5 7  | 12 8 5  |
| 2520.6057 | 0.15 | $-0.25 \times 10^{-2}$ | $\nu_5 + \nu_9$ | 7 7 0   | 8 6 2   | 2527.2424 | 0.13 | $-0.18 \times 10^{-2}$ | $\nu_5 + \nu_7$ | 12 6 7  | 11 4 8  |
| 2520.6151 | 0.17 | $-0.40 \times 10^{-2}$ | $\nu_5 + \nu_9$ | 7 7 1   | 8 6 3   | 2527.2424 | 0.13 | $-0.25 \times 10^{-2}$ | $\nu_5 + \nu_7$ | 15 11 5 | 14 11 4 |
| 2520.9102 | 0.12 | $0.47 \times 10^{-2}$  | $\nu_5 + \nu_7$ | 13 8 5  | 12 8 4  | 2527.4814 | 5.88 | $0.55 \times 10^{-3}$  | $\nu_3 + \nu_4$ | 8 8 0   | 7 7 1   |
| 2520.9476 | 0.11 | $-0.19 \times 10^{-2}$ | $\nu_5 + \nu_7$ | 12 9 4  | 11 9 3  | 2527.4814 | 5.88 | $0.83 \times 10^{-3}$  | $\nu_3 + \nu_4$ | 8 8 1   | 7 7 0   |
| 2520.9476 | 0.11 | $-0.23 \times 10^{-2}$ | $\nu_5 + \nu_7$ | 12 9 3  | 11 9 2  | 2527.5155 | 0.69 | $0.30 \times 10^{-2}$  | $\nu_5 + \nu_9$ | 5 3 3   | 6 2 5   |
| 2520.9964 | 2.34 | $-0.40 \times 10^{-4}$ | $\nu_3 + \nu_4$ | 8 3 6   | 7 2 5   | 2527.5155 | 0.69 | $0.23 \times 10^{-2}$  | $2\nu_9$        | 8 4 5   | 7 1 6   |
| 2521.1584 | 0.09 | $-0.27 \times 10^{-2}$ | $\nu_3 + \nu_4$ | 12 9 3  | 11 10 2 | 2527.5455 | 5.02 | $0.62 \times 10^{-2}$  | $\nu_3 + \nu_4$ | 9 0 9   | 8 1 8   |
| 2521.4593 | 2.58 | $0.40 \times 10^{-4}$  | $\nu_5 + \nu_9$ | 4 2 3   | 5 3 3   | 2527.5455 | 5.02 | $0.66 \times 10^{-2}$  | $\nu_3 + \nu_4$ | 9 1 9   | 8 0 8   |
| 2521.5080 | 0.69 | $-0.24 \times 10^{-2}$ | $\nu_3 + \nu_4$ | 10 5 6  | 9 6 3   | 2527.6157 | 0.11 | $0.70 \times 10^{-4}$  | $\nu_5 + \nu_7$ | 11 7 4  | 10 5 5  |
| 2521.5334 | 1.65 | $-0.27 \times 10^{-2}$ | $\nu_5 + \nu_9$ | 4 1 4   | 5 2 4   | 2527.8377 | 0.47 | $0.37 \times 10^{-2}$  | $\nu_5 + \nu_9$ | 5 4 2   | 6 3 4   |
| 2521.8498 | 0.53 | $0.26 \times 10^{-2}$  | $\nu_5 + \nu_9$ | 6 3 4   | 7 2 6   | 2528.1990 | 0.53 | $-0.26 \times 10^{-2}$ | $2\nu_9$        | 11 3 8  | 10 4 7  |
| 2522.0127 | 0.13 | $-0.17 \times 10^{-2}$ | $\nu_5 + \nu_7$ | 12 11 1 | 11 11 0 | 2528.2363 | 0.42 | $0.49 \times 10^{-2}$  | $\nu_3 + \nu_4$ | 11 4 8  | 10 5 5  |
| 2522.0127 | 0.13 | $-0.17 \times 10^{-2}$ | $\nu_5 + \nu_7$ | 12 11 2 | 11 11 1 | 2528.3591 | 0.14 | $0.52 \times 10^{-2}$  | $\nu_3 + \nu_4$ | 7 2 5   | 6 1 6   |
| 2522.0595 | 0.10 | $-0.51 \times 10^{-2}$ | $\nu_3 + \nu_4$ | 6 5 2   | 5 2 3   | 2528.3843 | 0.12 | $0.39 \times 10^{-2}$  | $\nu_3 + \nu_4$ | 7 3 5   | 6 0 6   |
| 2522.1087 | 2.37 | $-0.34 \times 10^{-2}$ | $\nu_5 + \nu_9$ | 4 0 4   | 5 1 4   | 2528.5352 | 0.35 | $-0.30 \times 10^{-2}$ | $\nu_5 + \nu_9$ | 5 1 4   | 6 0 6   |
| 2522.1335 | 0.44 | $0.27 \times 10^{-2}$  | $\nu_5 + \nu_9$ | 6 5 1   | 7 4 3   | 2528.6319 | 0.12 | $-0.57 \times 10^{-2}$ | $\nu_3 + \nu_4$ | 7 5 3   | 6 2 4   |
| 2522.1820 | 0.21 | $-0.41 \times 10^{-2}$ | $2\nu_9$        | 11 2 9  | 10 3 8  | 2528.6585 | 0.73 | $-0.32 \times 10^{-2}$ | $\nu_3 + \nu_4$ | 8 5 3   | 7 4 4   |
| 2522.3039 | 0.15 | $0.12 \times 10^{-2}$  | $2\nu_9$        | 11 3 9  | 10 2 8  | 2528.6738 | 3.29 | $0.84 \times 10^{-3}$  | $\nu_5 + \nu_9$ | 3 2 2   | 4 3 2   |
| 2522.5463 | 0.11 | $0.12 \times 10^{-2}$  | $2\nu_9$        | 14 1 13 | 13 2 12 | 2529.0563 | 0.39 | $-0.10 \times 10^{-2}$ | $\nu_5 + \nu_9$ | 5 2 4   | 6 1 6   |
| 2522.5463 | 0.11 | $0.39 \times 10^{-2}$  | $2\nu_9$        | 14 2 13 | 13 1 12 | 2529.2976 | 2.90 | $0.20 \times 10^{-2}$  | $\nu_5 + \nu_9$ | 3 2 1   | 4 3 1   |
| 2522.7206 | 0.49 | $0.26 \times 10^{-2}$  | $\nu_3 + \nu_4$ | 7 4 3   | 6 3 4   | 2529.3233 | 1.17 | $-0.27 \times 10^{-2}$ | $\nu_3 + \nu_4$ | 9 4 6   | 8 3 5   |
| 2522.7738 | 4.26 | $0.11 \times 10^{-2}$  | $\nu_5 + \nu_9$ | 4 2 2   | 5 3 2   | 2529.3233 | 1.17 | $0.18 \times 10^{-2}$  | $\nu_5 + \nu_7$ | 12 10 2 | 11 8 3  |
| 2522.8055 | 0.31 | $0.24 \times 10^{-2}$  | $\nu_5 + \nu_9$ | 6 5 2   | 7 4 4   | 2529.3396 | 2.29 | $-0.12 \times 10^{-2}$ | $\nu_5 + \nu_9$ | 3 1 3   | 4 2 3   |
| 2523.0394 | 0.61 | $0.12 \times 10^{-2}$  | $\nu_3 + \nu_4$ | 11 7 4  | 10 8 3  | 2529.4074 | 0.10 | $-0.42 \times 10^{-2}$ | $\nu_5 + \nu_9$ | 8 4 4   | 8 7 2   |
| 2523.0394 | 0.61 | $0.15 \times 10^{-2}$  | $2\nu_9$        | 9 7 2   | 8 6 3   | 2529.4074 | 0.10 | $0.29 \times 10^{-2}$  | $2\nu_9$        | 11 4 8  | 10 3 7  |
| 2523.3931 | 0.12 | $-0.15 \times 10^{-2}$ | $\nu_5 + \nu_9$ | 3 0 3   | 4 3 1   | 2529.5250 | 0.19 | $-0.44 \times 10^{-2}$ | $\nu_5 + \nu_7$ | 14 9 5  | 13 9 4  |
| 2523.4364 | 3.79 | $-0.22 \times 10^{-2}$ | $\nu_5 + \nu_9$ | 4 1 3   | 5 2 3   | 2529.5250 | 0.19 | $-0.48 \times 10^{-2}$ | $\nu_5 + \nu_7$ | 14 11 4 | 13 11 3 |
| 2523.5799 | 0.39 | $-0.41 \times 10^{-2}$ | $\nu_5 + \nu_9$ | 6 1 5   | 7 0 7   | 2529.5250 | 0.19 | $-0.28 \times 10^{-2}$ | $\nu_5 + \nu_9$ | 5 5 0   | 6 4 2   |
| 2523.6365 | 0.90 | $0.48 \times 10^{-2}$  | $\nu_5 + \nu_9$ | 5 3 2   | 6 2 4   | 2529.7418 | 0.26 | $-0.22 \times 10^{-2}$ | $\nu_5 + \nu_9$ | 5 5 1   | 6 4 3   |
| 2523.7992 | 0.34 | $-0.19 \times 10^{-2}$ | $\nu_5 + \nu_9$ | 6 2 5   | 7 1 7   | 2530.2637 | 1.08 | $0.18 \times 10^{-2}$  | $\nu_5 + \nu_9$ | 4 2 2   | 5 1 4   |
| 2523.8196 | 1.55 | $0.74 \times 10^{-3}$  | $\nu_3 + \nu_4$ | 8 4 5   | 7 3 4   | 2530.3293 | 2.00 | $-0.14 \times 10^{-2}$ | $\nu_5 + \nu_9$ | 3 0 3   | 4 1 3   |
| 2523.8661 | 0.29 | $0.69 \times 10^{-3}$  | $\nu_3 + \nu_4$ | 11 3 9  | 10 4 6  | 2530.4683 | 0.26 | $0.22 \times 10^{-3}$  | $\nu_5 + \nu_7$ | 14 13 2 | 13 13 1 |
| 2523.9566 | 0.40 | $0.50 \times 10^{-2}$  | $\nu_5 + \nu_7$ | 10 7 3  | 9 5 4   | 2530.5348 | 0.29 | $0.54 \times 10^{-3}$  | $\nu_3 + \nu_4$ | 11 6 5  | 10 7 4  |
| 2524.1310 | 0.24 | $-0.59 \times 10^{-2}$ | $2\nu_9$        | 8 4 4   | 7 3 5   | 2530.6473 | 0.83 | $0.38 \times 10^{-2}$  | $\nu_5 + \nu_9$ | 4 3 1   | 5 2 3   |
| 2524.1536 | 1.19 | $0.66 \times 10^{-2}$  | $\nu_3 + \nu_4$ | 9 4 5   | 8 5 4   | 2530.7624 | 0.13 | $-0.44 \times 10^{-2}$ | $\nu_5 + \nu_9$ | 9 4 5   | 9 7 3   |
| 2524.2459 | 0.11 | $0.44 \times 10^{-2}$  | $\nu_5 + \nu_9$ | 11 1 11 | 11 2 9  | 2530.8252 | 2.90 | $-0.80 \times 10^{-4}$ | $\nu_5 + \nu_9$ | 3 1 2   | 4 2 2   |
| 2524.4059 | 0.10 | $-0.31 \times 10^{-2}$ | $\nu_5 + \nu_7$ | 10 7 4  | 9 5 5   | 2530.9234 | 0.08 | $-0.25 \times 10^{-2}$ | $2\nu_9$        | 8 6 3   | 7 3 4   |
| 2524.4059 | 0.10 | $-0.31 \times 10^{-2}$ | $2\nu_9$        | 10 4 6  | 9 5 5   | 2531.0016 | 0.07 | $-0.38 \times 10^{-2}$ | $\nu_5 + \nu_7$ | 14 5 10 | 13 3 11 |
| 2524.6860 | 0.09 | $0.31 \times 10^{-2}$  | $\nu_5 + \nu_7$ | 12 4 9  | 11 2 10 | 2531.0016 | 0.07 | $-0.38 \times 10^{-2}$ | $2\nu_9$        | 14 2 12 | 13 3 11 |
| 2524.7307 | 0.10 | $0.76 \times 10^{-3}$  | $\nu_5 + \nu_7$ | 15 7 9  | 14 7 8  | 2531.0812 | 0.07 | $0.42 \times 10^{-3}$  | $\nu_5 + \nu_7$ | 12 7 5  | 11 5 6  |
| 2524.9656 | 0.67 | $0.37 \times 10^{-3}$  | $\nu_5 + \nu_9$ | 5 2 3   | 6 1 5   | 2531.1671 | 0.09 | $0.23 \times 10^{-3}$  | $\nu_5 + \nu_7$ | 14 10 5 | 13 10 4 |
| 2525.0953 | 0.22 | $-0.47 \times 10^{-2}$ | $\nu_5 + \nu_9$ | 6 6 0   | 7 5 2   | 2531.1671 | 0.09 | $0.92 \times 10^{-3}$  | $\nu_5 + \nu_7$ | 14 10 4 | 13 10 3 |
| 2525.1475 | 0.19 | $-0.46 \times 10^{-2}$ | $\nu_5 + \nu_9$ | 6 6 1   | 7 5 3   | 2531.1671 | 0.09 | $-0.12 \times 10^{-2}$ | $\nu_5 + \nu_9$ | 2 0 2   | 3 3 0   |
| 2525.2672 | 0.13 | $0.10 \times 10^{-2}$  | $\nu_5 + \nu_7$ | 14 8 6  | 13 8 5  | 2531.8980 | 1.01 | $-0.16 \times 10^{-2}$ | $\nu_3 + \nu_4$ | 10 4 6  | 9 5 5   |
| 2525.2926 | 0.12 | $-0.60 \times 10^{-2}$ | $\nu_3 + \nu_4$ | 6 5 1   | 5 2 4   | 2532.1239 | 0.16 | $0.17 \times 10^{-2}$  | $\nu_3 + \nu_4$ | 8 4 4   | 7 3 5   |
| 2525.4142 | 0.20 | $-0.54 \times 10^{-2}$ | $\nu_5 + \nu_7$ | 13 9 4  | 12 9 3  | 2532.1239 | 0.16 | $0.48 \times 10^{-2}$  | $\nu_5 + \nu_9$ | 10 4 6  | 10 7 4  |
| 2525.5697 | 0.31 | $0.62 \times 10^{-2}$  | $2\nu_9$        | 10 4 7  | 9 3 6   | 2532.3074 | 0.09 | $0.10 \times 10^{-2}$  | $\nu_5 + \nu_9$ | 9 0 9   | 9 3 7   |
| 2525.6063 | 0.08 | $0.22 \times 10^{-2}$  | $2\nu_9$        | 9 6 4   | 8 5 3   | 2532.3074 | 0.09 | $0.20 \times 10^{-2}$  | $2\nu_9$        | 12 3 9  | 11 4 8  |
| 2525.8558 | 0.09 | $-0.46 \times 10^{-2}$ | $\nu_3 + \nu_4$ | 7 3 4   | 6 2 5   | 2532.3901 | 0.86 | $0.74 \times 10^{-3}$  | $\nu_3 + \nu_4$ | 9 5 5   | 8 4 4   |
| 2525.9718 | 1.70 | $0.10 \times 10^{-2}$  | $\nu_3 + \nu_4$ | 8 5 4   | 7 4 3   | 2532.6269 | 0.19 | $0.63 \times 10^{-2}$  | $\nu_3 + \nu_4$ | 12 7 5  | 11 8 4  |



| (I)       | (II) | (III)                  | (IV)            | (V)     | (VI)        | (I)       | (II) | (III)                  | (IV)            | (V)     | (VI)    |
|-----------|------|------------------------|-----------------|---------|-------------|-----------|------|------------------------|-----------------|---------|---------|
| 2543.5547 | 0.10 | $0.12 \times 10^{-2}$  | $2\nu_9$        | 10      | 4 7 9 1 8   | 2549.5142 | 6.84 | $-0.25 \times 10^{-2}$ | $\nu_5 + \nu_9$ | 8 5 3   | 8 6 3   |
| 2543.6737 | 0.16 | $0.23 \times 10^{-2}$  | $\nu_5 + \nu_9$ | 14      | 6 9 14 7 7  | 2549.5827 | 0.21 | $0.29 \times 10^{-2}$  | $\nu_5 + \nu_9$ | 13 6 7  | 13 7 7  |
| 2543.7486 | 0.39 | $-0.30 \times 10^{-2}$ | $\nu_5 + \nu_9$ | 9       | 8 2 9 9 0   | 2549.7441 | 1.93 | $0.51 \times 10^{-2}$  | $\nu_3 + \nu_4$ | 11 10 1 | 10 9 2  |
| 2543.7486 | 0.39 | $-0.31 \times 10^{-2}$ | $\nu_5 + \nu_9$ | 9       | 8 1 9 9 1   | 2549.7441 | 1.93 | $0.53 \times 10^{-2}$  | $\nu_3 + \nu_4$ | 11 10 2 | 10 9 1  |
| 2543.7971 | 0.10 | $0.33 \times 10^{-2}$  | $\nu_3 + \nu_4$ | 9       | 3 6 8 2 7   | 2549.9850 | 0.85 | $0.10 \times 10^{-2}$  | $\nu_5 + \nu_9$ | 16 1 16 | 16 0 16 |
| 2543.7971 | 0.10 | $0.33 \times 10^{-2}$  | $2\nu_9$        | 9       | 5 4 8 2 7   | 2549.9850 | 0.85 | $-0.24 \times 10^{-2}$ | $\nu_5 + \nu_9$ | 16 0 16 | 16 1 16 |
| 2544.0708 | 2.43 | $0.17 \times 10^{-2}$  | $\nu_5 + \nu_9$ | 1 1 1   | 2 2 1       | 2549.9954 | 0.66 | $0.20 \times 10^{-2}$  | $\nu_5 + \nu_7$ | 15 3 12 | 14 1 13 |
| 2544.3647 | 0.20 | $-0.43 \times 10^{-2}$ | $\nu_5 + \nu_9$ | 14      | 7 8 14 8 6  | 2549.9954 | 0.66 | $0.15 \times 10^{-2}$  | $\nu_5 + \nu_9$ | 9 5 4   | 9 6 4   |
| 2544.4538 | 2.06 | $0.21 \times 10^{-2}$  | $\nu_5 + \nu_9$ | 1 1 0   | 2 2 0       | 2550.0346 | 0.08 | $-0.75 \times 10^{-3}$ | $\nu_5 + \nu_9$ | 3 0 3   | 3 3 1   |
| 2544.6391 | 0.16 | $-0.36 \times 10^{-2}$ | $\nu_5 + \nu_9$ | 6 1 5   | 6 4 3       | 2550.1340 | 0.58 | $-0.36 \times 10^{-2}$ | $\nu_3 + \nu_4$ | 11 7 4  | 10 6 5  |
| 2544.7149 | 0.22 | $0.23 \times 10^{-3}$  | $\nu_5 + \nu_9$ | 13      | 7 7 13 8 5  | 2550.1909 | 1.92 | $-0.43 \times 10^{-2}$ | $\nu_5 + \nu_9$ | 15 0 15 | 15 1 15 |
| 2544.7750 | 0.53 | $-0.98 \times 10^{-3}$ | $\nu_3 + \nu_4$ | 12      | 5 7 11 6 6  | 2550.1909 | 1.92 | $-0.49 \times 10^{-2}$ | $\nu_5 + \nu_9$ | 15 1 15 | 15 0 15 |
| 2544.7750 | 0.53 | $-0.98 \times 10^{-3}$ | $\nu_5 + \nu_7$ | 12      | 8 5 11 6 6  | 2550.2864 | 0.63 | $0.22 \times 10^{-2}$  | $\nu_5 + \nu_9$ | 8 4 5   | 8 5 3   |
| 2544.9058 | 0.24 | $-0.17 \times 10^{-2}$ | $\nu_5 + \nu_9$ | 12      | 7 6 12 8 4  | 2550.3976 | 0.38 | $-0.26 \times 10^{-2}$ | $\nu_5 + \nu_9$ | 6 2 5   | 6 3 3   |
| 2545.0518 | 0.42 | $-0.18 \times 10^{-2}$ | $\nu_5 + \nu_9$ | 11      | 7 5 11 8 3  | 2550.5410 | 1.96 | $0.21 \times 10^{-2}$  | $\nu_3 + \nu_4$ | 11 11 0 | 10 10 1 |
| 2545.1546 | 0.31 | $-0.40 \times 10^{-4}$ | $\nu_5 + \nu_9$ | 11      | 7 4 11 8 4  | 2550.5410 | 1.96 | $0.21 \times 10^{-2}$  | $\nu_3 + \nu_4$ | 11 11 1 | 10 10 0 |
| 2545.2094 | 0.34 | $-0.16 \times 10^{-2}$ | $\nu_5 + \nu_9$ | 10      | 7 4 10 8 2  | 2550.7582 | 2.97 | $-0.51 \times 10^{-3}$ | $\nu_5 + \nu_9$ | 14 0 14 | 14 1 14 |
| 2545.2372 | 0.55 | $0.10 \times 10^{-2}$  | $\nu_5 + \nu_9$ | 10      | 7 3 10 8 3  | 2550.7582 | 2.97 | $-0.82 \times 10^{-3}$ | $\nu_5 + \nu_9$ | 14 1 14 | 14 0 14 |
| 2545.2372 | 0.55 | $-0.16 \times 10^{-2}$ | $\nu_5 + \nu_9$ | 12      | 7 5 12 8 5  | 2550.8918 | 0.85 | $-0.31 \times 10^{-3}$ | $\nu_5 + \nu_9$ | 7 3 5   | 7 4 3   |
| 2545.2537 | 0.27 | $0.19 \times 10^{-2}$  | $\nu_5 + \nu_9$ | 6 1 6   | 6 2 4       | 2550.9108 | 0.91 | $0.48 \times 10^{-2}$  | $\nu_5 + \nu_9$ | 7 4 4   | 7 5 2   |
| 2545.3625 | 0.20 | $0.26 \times 10^{-2}$  | $\nu_5 + \nu_9$ | 2 2 1   | 3 1 3       | 2550.9401 | 0.85 | $0.66 \times 10^{-2}$  | $\nu_5 + \nu_9$ | 10 5 5  | 10 6 5  |
| 2545.3984 | 0.58 | $-0.50 \times 10^{-2}$ | $\nu_5 + \nu_9$ | 9 7 2   | 9 8 2       | 2550.9401 | 0.85 | $-0.38 \times 10^{-2}$ | $2\nu_9$        | 11 4 8  | 10 1 9  |
| 2545.3984 | 0.58 | $-0.10 \times 10^{-3}$ | $\nu_5 + \nu_9$ | 9 7 3   | 9 8 1       | 2551.0138 | 0.38 | $0.58 \times 10^{-2}$  | $\nu_3 + \nu_4$ | 10 5 6  | 9 2 7   |
| 2545.5018 | 0.26 | $-0.34 \times 10^{-2}$ | $\nu_5 + \nu_9$ | 9 3 7   | 9 4 5       | 2551.0578 | 0.08 | $-0.72 \times 10^{-3}$ | $\nu_3 + \nu_4$ | 8 8 1   | 7 5 2   |
| 2545.6108 | 0.51 | $-0.21 \times 10^{-2}$ | $\nu_5 + \nu_9$ | 8 7 2   | 8 8 0       | 2551.2545 | 1.26 | $-0.66 \times 10^{-2}$ | $\nu_5 + \nu_9$ | 15 2 14 | 15 1 14 |
| 2545.6108 | 0.51 | $-0.28 \times 10^{-2}$ | $\nu_5 + \nu_9$ | 8 7 1   | 8 8 1       | 2551.2545 | 1.26 | $-0.49 \times 10^{-2}$ | $\nu_5 + \nu_9$ | 15 1 14 | 15 2 14 |
| 2545.6265 | 0.19 | $0.42 \times 10^{-2}$  | $\nu_5 + \nu_9$ | 13      | 7 6 13 8 6  | 2551.4262 | 0.62 | $0.38 \times 10^{-2}$  | $\nu_5 + \nu_9$ | 5 4 2   | 5 5 0   |
| 2545.6634 | 1.89 | $0.15 \times 10^{-2}$  | $\nu_5 + \nu_9$ | 1 0 1   | 2 1 1       | 2551.5049 | 0.47 | $0.41 \times 10^{-2}$  | $\nu_5 + \nu_9$ | 5 4 1   | 5 5 1   |
| 2545.7759 | 0.74 | $-0.26 \times 10^{-2}$ | $\nu_3 + \nu_4$ | 12      | 4 8 11 5 7  | 2551.5440 | 3.99 | $-0.52 \times 10^{-2}$ | $\nu_5 + \nu_9$ | 13 0 13 | 13 1 13 |
| 2545.9197 | 0.13 | $-0.40 \times 10^{-2}$ | $\nu_5 + \nu_9$ | 5 1 4   | 5 4 2       | 2551.5440 | 3.99 | $-0.55 \times 10^{-2}$ | $\nu_5 + \nu_9$ | 13 1 13 | 13 0 13 |
| 2545.9747 | 1.01 | $0.40 \times 10^{-2}$  | $\nu_3 + \nu_4$ | 12      | 3 9 11 4 8  | 2551.5889 | 0.94 | $0.66 \times 10^{-2}$  | $\nu_5 + \nu_9$ | 6 4 2   | 6 5 2   |
| 2546.4349 | 0.14 | $-0.14 \times 10^{-2}$ | $\nu_5 + \nu_9$ | 4 1 3   | 4 4 1       | 2551.9054 | 1.85 | $0.18 \times 10^{-2}$  | $\nu_5 + \nu_9$ | 14 2 13 | 14 1 13 |
| 2546.4676 | 1.94 | $-0.20 \times 10^{-2}$ | $\nu_3 + \nu_4$ | 12      | 3 10 11 2 9 | 2551.9054 | 1.85 | $0.53 \times 10^{-2}$  | $\nu_5 + \nu_9$ | 14 1 13 | 14 2 13 |
| 2546.5930 | 0.14 | $0.21 \times 10^{-2}$  | $\nu_3 + \nu_4$ | 9 2 7   | 8 1 8       | 2552.2552 | 0.80 | $0.28 \times 10^{-2}$  | $\nu_5 + \nu_9$ | 6 3 4   | 6 4 2   |
| 2546.5930 | 0.14 | $0.25 \times 10^{-2}$  | $\nu_3 + \nu_4$ | 9 3 7   | 8 0 8       | 2552.2552 | 0.80 | $-0.64 \times 10^{-2}$ | $\nu_5 + \nu_9$ | 11 5 6  | 11 6 6  |
| 2546.6409 | 1.30 | $-0.66 \times 10^{-2}$ | $\nu_3 + \nu_4$ | 12      | 4 9 11 3 8  | 2552.2643 | 0.78 | $0.27 \times 10^{-2}$  | $\nu_5 + \nu_9$ | 11 5 6  | 11 6 6  |
| 2546.9299 | 0.39 | $0.35 \times 10^{-3}$  | $\nu_5 + \nu_9$ | 10      | 6 5 10 7 3  | 2552.6351 | 0.12 | $-0.63 \times 10^{-2}$ | $\nu_3 + \nu_4$ | 10 6 5  | 9 3 6   |
| 2547.1296 | 0.74 | $0.37 \times 10^{-2}$  | $\nu_5 + \nu_9$ | 9 6 4   | 9 7 2       | 2552.7403 | 3.31 | $0.34 \times 10^{-2}$  | $\nu_5 + \nu_9$ | 0 0 0   | 1 1 0   |
| 2547.1513 | 0.32 | $-0.32 \times 10^{-2}$ | $\nu_3 + \nu_4$ | 11      | 6 6 10 5 5  | 2552.7403 | 3.31 | $0.53 \times 10^{-2}$  | $\nu_5 + \nu_9$ | 13 2 12 | 13 1 12 |
| 2547.1513 | 0.32 | $-0.17 \times 10^{-2}$ | $\nu_5 + \nu_9$ | 7 2 6   | 7 3 4       | 2552.7630 | 1.17 | $0.58 \times 10^{-2}$  | $\nu_3 + \nu_4$ | 13 3 10 | 12 4 9  |
| 2547.2326 | 0.43 | $0.42 \times 10^{-2}$  | $\nu_5 + \nu_9$ | 9 6 3   | 9 7 3       | 2552.7782 | 0.78 | $0.35 \times 10^{-3}$  | $\nu_3 + \nu_4$ | 10 3 7  | 9 2 8   |
| 2547.2909 | 0.58 | $0.48 \times 10^{-2}$  | $\nu_5 + \nu_9$ | 10 6 4  | 10 7 4      | 2552.7782 | 0.78 | $-0.64 \times 10^{-3}$ | $\nu_5 + \nu_9$ | 5 2 4   | 5 3 2   |
| 2547.3184 | 0.49 | $0.31 \times 10^{-2}$  | $\nu_5 + \nu_9$ | 8 6 3   | 8 7 1       | 2552.8486 | 0.90 | $0.57 \times 10^{-2}$  | $\nu_5 + \nu_9$ | 8 4 4   | 8 5 4   |
| 2547.3409 | 0.55 | $0.29 \times 10^{-2}$  | $\nu_5 + \nu_9$ | 8 6 2   | 8 7 2       | 2552.9130 | 0.51 | $0.54 \times 10^{-2}$  | $\nu_3 + \nu_4$ | 12 6 7  | 11 5 6  |
| 2547.5064 | 2.36 | $0.51 \times 10^{-2}$  | $\nu_3 + \nu_4$ | 12 1 11 | 11 2 10     | 2552.9130 | 0.51 | $0.29 \times 10^{-2}$  | $\nu_3 + \nu_4$ | 14 7 7  | 13 8 6  |
| 2547.5172 | 2.53 | $-0.55 \times 10^{-2}$ | $\nu_3 + \nu_4$ | 12 2 11 | 11 1 10     | 2552.9569 | 0.97 | $-0.47 \times 10^{-2}$ | $\nu_5 + \nu_9$ | 14 2 12 | 14 3 12 |
| 2547.5172 | 2.53 | $-0.19 \times 10^{-2}$ | $\nu_5 + \nu_9$ | 7 6 2   | 7 7 0       | 2552.9831 | 0.97 | $0.31 \times 10^{-2}$  | $\nu_5 + \nu_9$ | 5 3 3   | 5 4 1   |
| 2547.5172 | 2.53 | $-0.54 \times 10^{-2}$ | $\nu_5 + \nu_9$ | 7 6 1   | 7 7 1       | 2553.0877 | 1.07 | $-0.56 \times 10^{-3}$ | $\nu_3 + \nu_4$ | 13 4 10 | 12 3 9  |
| 2547.6548 | 0.30 | $0.34 \times 10^{-2}$  | $\nu_5 + \nu_9$ | 11 6 5  | 11 7 5      | 2553.3449 | 0.59 | $0.29 \times 10^{-2}$  | $\nu_5 + \nu_9$ | 4 3 2   | 4 4 0   |
| 2547.6913 | 0.30 | $0.20 \times 10^{-2}$  | $\nu_5 + \nu_7$ | 11 9 3  | 10 7 4      | 2553.3746 | 3.26 | $0.16 \times 10^{-2}$  | $\nu_5 + \nu_9$ | 11 0 11 | 11 1 11 |
| 2547.9288 | 0.08 | $-0.28 \times 10^{-2}$ | $\nu_5 + \nu_7$ | 15 5 11 | 14 3 12     | 2553.4017 | 4.11 | $0.35 \times 10^{-2}$  | $\nu_5 + \nu_9$ | 11 1 11 | 11 0 11 |
| 2548.3543 | 0.16 | $-0.27 \times 10^{-2}$ | $\nu_5 + \nu_9$ | 4 0 4   | 4 3 2       | 2553.4878 | 1.14 | $-0.33 \times 10^{-2}$ | $\nu_3 + \nu_4$ | 13 3 11 | 12 2 10 |
| 2548.4445 | 0.33 | $0.48 \times 10^{-2}$  | $\nu_5 + \nu_9$ | 12 6 6  | 12 7 6      | 2553.5554 | 1.94 | $0.44 \times 10^{-2}$  | $\nu_5 + \nu_9$ | 12 2 11 | 12 1 11 |
| 2548.5748 | 0.41 | $-0.46 \times 10^{-2}$ | $\nu_5 + \nu_9$ | 10 5 6  | 10 6 4      | 2553.6142 | 0.26 | $0.15 \times 10^{-2}$  | $\nu_3 + \nu_4$ | 11 6 5  | 10 5 6  |
| 2548.6596 | 0.35 | $-0.24 \times 10^{-2}$ | $\nu_5 + \nu_9$ | 8 3 6   | 8 4 4       | 2553.6448 | 0.72 | $0.37 \times 10^{-2}$  | $\nu_5 + \nu_9$ | 4 3 1   | 4 4 1   |
| 2548.8443 | 0.62 | $0.31 \times 10^{-3}$  | $\nu_5 + \nu_9$ | 1 1 0   | 2 0 2       | 2553.6682 | 0.11 | $-0.29 \times 10^{-2}$ | $\nu_3 + \nu_4$ | 9 7 2   | 8 4 5   |
| 2548.9283 | 0.15 | $0.11 \times 10^{-2}$  | $\nu_3 + \nu_4$ | 12 5 8  | 11 4 7      | 2553.7562 | 0.40 | $0.38 \times 10^{-2}$  | $\nu_5 + \nu_9$ | 12 5 7  | 12 6 7  |
| 2548.9439 | 0.63 | $0.10 \times 10^{-4}$  | $\nu_5 + \nu_9$ | 9 5 5   | 9 6 3       | 2553.8219 | 1.26 | $-0.38 \times 10^{-2}$ | $\nu_5 + \nu_9$ | 13 3 11 | 13 2 11 |
| 2549.0884 | 0.20 | $-0.70 \times 10^{-4}$ | $\nu_5 + \nu_7$ | 13 11 3 | 12 9 4      | 2553.9918 | 0.66 | $0.24 \times 10^{-2}$  | $\nu_5 + \nu_9$ | 9 4 5   | 9 5 5   |
| 2549.0884 | 0.20 | $-0.27 \times 10^{-2}$ | $\nu_5 + \nu_9$ | 5 1 5   | 5 2 3       | 2554.0173 | 0.79 | $0.47 \times 10^{-2}$  | $\nu_5 + \nu_9$ | 5 3 2   | 5 4 2   |
| 2549.1103 | 0.56 | $-0.21 \times 10^{-2}$ | $\nu_5 + \nu_9$ | 9 4 6   | 9 5 4       | 2554.2366 | 0.21 | $-0.12 \times 10^{-2}$ | $2\nu_9$        | 9 4 5   | 8 1 8   |
| 2549.1493 | 1.89 | $-0.28 \times 10^{-3}$ | $\nu_5 + \nu_9$ | 8 5 4   | 8 6 2       | 2554.2760 | 0.69 | $0.35 \times 10^{-3}$  | $\nu_5 + \nu_9$ | 4 2 3   | 4 3 1   |
| 2549.3071 | 0.69 | $0.49 \times 10^{-2}$  | $\nu_5 + \nu_9$ | 7 5 3   | 7 6 1       | 2554.4308 | 0.42 | $-0.55 \times 10^{-2}$ | $\nu_3 + \nu_4$ | 13 5 9  | 12 4 8  |
| 2549.4043 | 0.57 | $0.58 \times 10^{-2}$  | $\nu_5 + \nu_9$ | 7 5 2   | 7 6 2       | 2554.6580 | 3.68 | $-0.20 \times 10^{-2}$ | $\nu_5 + \nu_9$ | 10 1 10 | 10 0 10 |
| 2549.4648 | 0.43 | $0.28 \times 10^{-2}$  | $\nu_5 + \nu_9$ | 6 5 2   | 6 6 0       | 2554.7427 | 1.28 | $0.36 \times 10^{-2}$  | $\nu_5 + \nu_9$ | 6 3 3   | 6 4 3   |
| 2549.4819 | 0.55 | $0.26 \times 10^{-2}$  | $\nu_5 + \nu_9$ | 6 5 1   | 6 6 1       | 2554.7803 | 0.61 | $-0.12 \times 10^{-2}$ | $\nu_5 + \nu_9$ | 3 1 3   | 3 2 1   |
| 2549.5142 | 6.84 | $0.19 \times 10^{-2}$  | $\nu_3 + \nu_4$ | 12 0 12 | 11 1 11     | 2554.8019 | 3.04 | $0.38 \times 10^{-3}$  | $\nu_5 + \nu_9$ | 13 4 10 | 13 3 10 |



| (I)       | (II) | (III)                  | (IV)            | (V)     | (VI)    | (I)       | (II) | (III)                  | (IV)            | (V)     | (VI)    |
|-----------|------|------------------------|-----------------|---------|---------|-----------|------|------------------------|-----------------|---------|---------|
| 2568.9659 | 1.47 | $-0.20 \times 10^{-2}$ | $\nu_5 + \nu_9$ | 6 3 3   | 6 2 5   | 2576.0340 | 0.55 | $0.18 \times 10^{-2}$  | $\nu_5 + \nu_9$ | 13 9 5  | 13 8 5  |
| 2568.9659 | 1.47 | $0.32 \times 10^{-2}$  | $\nu_5 + \nu_9$ | 6 5 2   | 6 4 2   | 2576.0778 | 0.38 | $0.22 \times 10^{-3}$  | $\nu_3 + \nu_4$ | 11 9 3  | 10 6 4  |
| 2569.2002 | 1.55 | $0.23 \times 10^{-2}$  | $\nu_5 + \nu_9$ | 6 5 1   | 6 4 3   | 2576.0778 | 0.38 | $0.14 \times 10^{-2}$  | $\nu_5 + \nu_9$ | 13 9 4  | 13 8 6  |
| 2569.4157 | 2.05 | $-0.59 \times 10^{-2}$ | $\nu_3 + \nu_4$ | 10 9 2  | 9 6 3   | 2576.1985 | 0.10 | $-0.14 \times 10^{-3}$ | $2\nu_9$        | 15 3 12 | 14 2 13 |
| 2569.4368 | 1.23 | $-0.36 \times 10^{-2}$ | $\nu_5 + \nu_9$ | 5 5 1   | 5 4 1   | 2576.5099 | 0.51 | $0.68 \times 10^{-3}$  | $\nu_5 + \nu_9$ | 12 9 4  | 12 8 4  |
| 2569.4863 | 0.89 | $-0.33 \times 10^{-2}$ | $\nu_5 + \nu_9$ | 5 5 0   | 5 4 2   | 2576.5199 | 0.64 | $-0.56 \times 10^{-3}$ | $\nu_5 + \nu_9$ | 12 9 3  | 12 8 5  |
| 2569.6312 | 0.95 | $-0.33 \times 10^{-2}$ | $\nu_3 + \nu_4$ | 15 2 14 | 14 1 13 | 2576.5827 | 0.22 | $0.38 \times 10^{-2}$  | $\nu_5 + \nu_9$ | 12 5 7  | 12 4 9  |
| 2569.6868 | 1.34 | $0.49 \times 10^{-2}$  | $\nu_3 + \nu_4$ | 15 1 14 | 14 2 13 | 2576.6500 | 2.94 | $0.19 \times 10^{-2}$  | $\nu_5 + \nu_9$ | 2 2 0   | 1 1 0   |
| 2569.7316 | 1.23 | $0.30 \times 10^{-2}$  | $\nu_5 + \nu_9$ | 9 6 4   | 9 5 4   | 2576.9161 | 1.91 | $0.18 \times 10^{-2}$  | $\nu_5 + \nu_9$ | 2 2 1   | 1 1 1   |
| 2570.1057 | 0.20 | $0.28 \times 10^{-3}$  | $\nu_5 + \nu_9$ | 5 2 3   | 5 1 5   | 2576.9377 | 1.33 | $-0.17 \times 10^{-2}$ | $\nu_5 + \nu_9$ | 11 9 3  | 11 8 3  |
| 2570.3681 | 0.96 | $0.35 \times 10^{-2}$  | $\nu_5 + \nu_9$ | 10 6 4  | 10 5 6  | 2576.9377 | 1.33 | $-0.41 \times 10^{-2}$ | $\nu_5 + \nu_9$ | 11 9 2  | 11 8 4  |
| 2570.4552 | 0.93 | $0.42 \times 10^{-2}$  | $\nu_5 + \nu_9$ | 9 6 3   | 9 5 5   | 2577.1922 | 0.18 | $0.22 \times 10^{-2}$  | $\nu_5 + \nu_9$ | 8 4 5   | 8 1 7   |
| 2570.4776 | 0.17 | $0.14 \times 10^{-2}$  | $\nu_5 + \nu_9$ | 3 3 1   | 3 0 3   | 2577.2892 | 0.23 | $-0.11 \times 10^{-2}$ | $\nu_5 + \nu_9$ | 3 0 3   | 2 1 1   |
| 2570.5436 | 1.06 | $0.28 \times 10^{-2}$  | $\nu_5 + \nu_9$ | 8 6 3   | 8 5 3   | 2577.3278 | 1.19 | $-0.13 \times 10^{-2}$ | $\nu_5 + \nu_9$ | 10 9 2  | 10 8 2  |
| 2570.7678 | 3.99 | $-0.15 \times 10^{-2}$ | $\nu_5 + \nu_9$ | 8 6 2   | 8 5 4   | 2577.3278 | 1.19 | $-0.17 \times 10^{-2}$ | $\nu_5 + \nu_9$ | 10 9 1  | 10 8 3  |
| 2571.0967 | 1.43 | $-0.32 \times 10^{-3}$ | $\nu_5 + \nu_9$ | 7 6 2   | 7 5 2   | 2577.3456 | 0.13 | $-0.11 \times 10^{-2}$ | $\nu_5 + \nu_7$ | 14 13 2 | 13 11 3 |
| 2571.1152 | 0.50 | $0.11 \times 10^{-2}$  | $\nu_3 + \nu_4$ | 14 11 3 | 13 10 4 | 2577.7893 | 0.29 | $-0.45 \times 10^{-2}$ | $\nu_5 + \nu_9$ | 8 5 4   | 8 2 6   |
| 2571.1152 | 0.50 | $0.40 \times 10^{-2}$  | $\nu_3 + \nu_4$ | 14 11 4 | 13 10 3 | 2578.0786 | 0.23 | $0.56 \times 10^{-3}$  | $\nu_5 + \nu_9$ | 3 1 2   | 2 2 0   |
| 2571.1527 | 1.02 | $-0.15 \times 10^{-3}$ | $\nu_5 + \nu_9$ | 7 6 1   | 7 5 3   | 2578.4416 | 0.29 | $0.10 \times 10^{-3}$  | $\nu_5 + \nu_9$ | 9 5 5   | 9 2 7   |
| 2571.3277 | 0.82 | $-0.18 \times 10^{-2}$ | $\nu_5 + \nu_9$ | 11 7 5  | 11 6 5  | 2578.5465 | 0.07 | $0.29 \times 10^{-2}$  | $\nu_5 + \nu_9$ | 6 5 2   | 6 2 4   |
| 2571.4388 | 0.31 | $0.11 \times 10^{-2}$  | $\nu_5 + \nu_9$ | 7 3 4   | 7 2 6   | 2578.6342 | 0.16 | $-0.15 \times 10^{-2}$ | $\nu_5 + \nu_9$ | 11 4 7  | 11 3 9  |
| 2571.4992 | 1.03 | $0.42 \times 10^{-2}$  | $\nu_5 + \nu_9$ | 4 3 2   | 4 0 4   | 2578.7426 | 0.81 | $0.10 \times 10^{-2}$  | $\nu_5 + \nu_9$ | 13 10 4 | 13 9 4  |
| 2571.4992 | 1.03 | $-0.34 \times 10^{-2}$ | $\nu_5 + \nu_9$ | 6 6 1   | 6 5 1   | 2578.7426 | 0.81 | $-0.13 \times 10^{-2}$ | $\nu_5 + \nu_9$ | 13 10 3 | 13 9 5  |
| 2571.5062 | 1.04 | $0.36 \times 10^{-2}$  | $\nu_5 + \nu_9$ | 6 6 1   | 6 5 1   | 2579.0535 | 0.21 | $-0.24 \times 10^{-2}$ | $\nu_5 + \nu_9$ | 9 4 6   | 9 1 8   |
| 2571.7885 | 0.60 | $0.16 \times 10^{-2}$  | $\nu_5 + \nu_9$ | 12 7 5  | 12 6 7  | 2579.0802 | 0.50 | $0.42 \times 10^{-3}$  | $\nu_5 + \nu_9$ | 8 3 6   | 8 0 8   |
| 2571.8759 | 0.37 | $0.48 \times 10^{-2}$  | $\nu_5 + \nu_9$ | 12 6 6  | 12 5 8  | 2579.1090 | 0.84 | $0.28 \times 10^{-2}$  | $\nu_5 + \nu_9$ | 12 10 2 | 12 9 4  |
| 2571.9000 | 0.27 | $0.26 \times 10^{-2}$  | $\nu_5 + \nu_9$ | 14 8 7  | 14 7 7  | 2579.1090 | 0.84 | $0.33 \times 10^{-2}$  | $\nu_5 + \nu_9$ | 12 10 3 | 12 9 3  |
| 2571.9630 | 0.63 | $0.43 \times 10^{-3}$  | $\nu_5 + \nu_9$ | 11 7 4  | 11 6 6  | 2579.3308 | 0.08 | $0.47 \times 10^{-2}$  | $\nu_3 + \nu_4$ | 14 7 7  | 13 6 8  |
| 2572.0212 | 0.36 | $0.26 \times 10^{-3}$  | $\nu_5 + \nu_9$ | 2 0 2   | 1 1 0   | 2579.4562 | 0.89 | $0.10 \times 10^{-2}$  | $\nu_5 + \nu_9$ | 11 10 1 | 11 9 3  |
| 2572.0425 | 0.29 | $0.43 \times 10^{-2}$  | $\nu_5 + \nu_9$ | 13 7 6  | 13 6 8  | 2579.4562 | 0.89 | $0.11 \times 10^{-2}$  | $\nu_5 + \nu_9$ | 11 10 2 | 11 9 2  |
| 2572.1274 | 0.76 | $-0.11 \times 10^{-2}$ | $\nu_5 + \nu_9$ | 10 7 4  | 10 6 4  | 2579.5684 | 0.36 | $-0.38 \times 10^{-2}$ | $\nu_5 + \nu_9$ | 5 5 1   | 5 2 3   |
| 2572.3350 | 1.06 | $-0.58 \times 10^{-3}$ | $\nu_5 + \nu_9$ | 10 7 3  | 10 6 5  | 2579.7634 | 0.15 | $-0.43 \times 10^{-2}$ | $\nu_5 + \nu_9$ | 10 5 6  | 10 2 8  |
| 2572.5511 | 3.01 | $-0.10 \times 10^{-2}$ | $\nu_5 + \nu_9$ | 9 4 5   | 9 3 7   | 2579.7826 | 0.67 | $0.49 \times 10^{-2}$  | $\nu_5 + \nu_9$ | 10 10 0 | 10 9 2  |
| 2572.7077 | 1.21 | $-0.18 \times 10^{-2}$ | $\nu_5 + \nu_9$ | 9 7 3   | 9 6 3   | 2579.7826 | 0.67 | $0.49 \times 10^{-2}$  | $\nu_5 + \nu_9$ | 10 10 1 | 10 9 1  |
| 2572.7634 | 0.87 | $-0.15 \times 10^{-2}$ | $\nu_5 + \nu_9$ | 9 7 2   | 9 6 4   | 2579.8876 | 0.21 | $-0.39 \times 10^{-2}$ | $\nu_5 + \nu_9$ | 13 5 8  | 13 4 10 |
| 2572.9819 | 0.63 | $-0.17 \times 10^{-2}$ | $\nu_5 + \nu_9$ | 5 3 3   | 5 0 5   | 2580.0630 | 0.15 | $-0.31 \times 10^{-2}$ | $\nu_5 + \nu_9$ | 4 1 4   | 3 2 2   |
| 2572.9819 | 0.63 | $0.31 \times 10^{-2}$  | $\nu_5 + \nu_9$ | 6 2 4   | 6 1 6   | 2580.9170 | 0.09 | $0.62 \times 10^{-3}$  | $\nu_5 + \nu_9$ | 4 2 3   | 3 3 1   |
| 2572.9819 | 0.63 | $0.45 \times 10^{-2}$  | $\nu_5 + \nu_9$ | 13 8 6  | 13 7 6  | 2580.9804 | 0.22 | $0.32 \times 10^{-2}$  | $\nu_5 + \nu_9$ | 9 2 7   | 9 1 9   |
| 2573.1671 | 0.96 | $-0.23 \times 10^{-2}$ | $\nu_5 + \nu_9$ | 8 7 2   | 8 6 2   | 2580.9804 | 0.22 | $0.17 \times 10^{-2}$  | $\nu_5 + \nu_9$ | 10 6 5  | 10 3 7  |
| 2573.1779 | 1.13 | $-0.31 \times 10^{-2}$ | $\nu_5 + \nu_9$ | 8 7 1   | 8 6 3   | 2581.0449 | 0.08 | $0.38 \times 10^{-2}$  | $\nu_3 + \nu_4$ | 11 10 1 | 10 7 4  |
| 2573.2650 | 0.31 | $-0.25 \times 10^{-2}$ | $\nu_5 + \nu_9$ | 14 8 6  | 14 7 8  | 2581.1896 | 0.07 | $-0.11 \times 10^{-3}$ | $\nu_5 + \nu_9$ | 14 11 4 | 14 10 4 |
| 2573.5153 | 0.38 | $0.47 \times 10^{-2}$  | $\nu_5 + \nu_9$ | 13 8 5  | 13 7 7  | 2581.1896 | 0.07 | $-0.56 \times 10^{-3}$ | $\nu_5 + \nu_9$ | 14 11 3 | 14 10 5 |
| 2573.5499 | 1.40 | $-0.36 \times 10^{-2}$ | $\nu_5 + \nu_9$ | 7 7 1   | 7 6 1   | 2581.2773 | 0.13 | $-0.28 \times 10^{-2}$ | $\nu_5 + \nu_9$ | 9 3 7   | 9 0 9   |
| 2573.6208 | 0.29 | $0.48 \times 10^{-2}$  | $\nu_5 + \nu_9$ | 11 5 6  | 11 4 8  | 2581.3660 | 0.60 | $-0.27 \times 10^{-2}$ | $\nu_5 + \nu_9$ | 13 11 3 | 13 10 3 |
| 2573.7462 | 0.56 | $0.41 \times 10^{-2}$  | $\nu_5 + \nu_9$ | 13 6 7  | 13 5 9  | 2581.3660 | 0.60 | $-0.27 \times 10^{-2}$ | $\nu_5 + \nu_9$ | 13 11 2 | 13 10 4 |
| 2573.7462 | 0.56 | $-0.55 \times 10^{-3}$ | $\nu_5 + \nu_9$ | 12 8 5  | 12 7 5  | 2581.6390 | 1.05 | $0.27 \times 10^{-2}$  | $\nu_5 + \nu_9$ | 12 11 1 | 12 10 3 |
| 2573.9256 | 0.66 | $0.22 \times 10^{-3}$  | $\nu_5 + \nu_9$ | 12 8 4  | 12 7 6  | 2581.6390 | 1.05 | $0.27 \times 10^{-2}$  | $\nu_5 + \nu_9$ | 12 11 2 | 12 10 2 |
| 2574.0579 | 0.17 | $-0.13 \times 10^{-2}$ | $\nu_5 + \nu_7$ | 14 13 1 | 13 11 2 | 2581.6719 | 0.23 | $-0.36 \times 10^{-2}$ | $\nu_5 + \nu_9$ | 12 4 8  | 12 3 10 |
| 2574.1463 | 0.13 | $0.35 \times 10^{-2}$  | $\nu_5 + \nu_9$ | 5 4 2   | 5 1 4   | 2581.6850 | 0.17 | $0.30 \times 10^{-2}$  | $\nu_5 + \nu_9$ | 9 6 4   | 9 3 6   |
| 2574.3316 | 1.30 | $-0.21 \times 10^{-2}$ | $\nu_5 + \nu_9$ | 11 8 4  | 11 7 4  | 2581.8107 | 0.20 | $-0.31 \times 10^{-2}$ | $\nu_5 + \nu_9$ | 4 0 4   | 3 1 2   |
| 2574.3827 | 0.76 | $0.29 \times 10^{-3}$  | $\nu_3 + \nu_4$ | 10 10 0 | 9 7 3   | 2582.4705 | 1.81 | $0.21 \times 10^{-3}$  | $\nu_5 + \nu_9$ | 3 1 2   | 2 0 2   |
| 2574.3827 | 0.76 | $0.24 \times 10^{-2}$  | $\nu_3 + \nu_4$ | 10 10 1 | 9 7 2   | 2582.9072 | 0.20 | $-0.39 \times 10^{-2}$ | $\nu_5 + \nu_9$ | 4 2 2   | 3 3 0   |
| 2574.3827 | 0.76 | $-0.18 \times 10^{-2}$ | $\nu_5 + \nu_9$ | 11 8 3  | 11 7 5  | 2582.9386 | 0.09 | $0.33 \times 10^{-2}$  | $\nu_5 + \nu_9$ | 8 6 3   | 8 3 5   |
| 2574.6127 | 0.18 | $0.59 \times 10^{-2}$  | $\nu_5 + \nu_9$ | 6 4 3   | 6 1 5   | 2583.1935 | 2.59 | $0.22 \times 10^{-2}$  | $\nu_5 + \nu_9$ | 3 2 1   | 2 1 1   |
| 2574.8149 | 0.80 | $-0.37 \times 10^{-2}$ | $\nu_5 + \nu_9$ | 10 8 3  | 10 7 3  | 2583.2724 | 0.69 | $-0.19 \times 10^{-2}$ | $\nu_5 + \nu_9$ | 10 2 8  | 10 1 10 |
| 2574.8262 | 0.97 | $-0.24 \times 10^{-2}$ | $\nu_5 + \nu_9$ | 6 3 4   | 6 0 6   | 2583.7317 | 2.46 | $0.10 \times 10^{-2}$  | $\nu_5 + \nu_9$ | 3 2 2   | 2 1 2   |
| 2575.0978 | 0.19 | $-0.18 \times 10^{-2}$ | $\nu_5 + \nu_9$ | 3 1 3   | 2 2 1   | 2583.9244 | 0.42 | $-0.36 \times 10^{-3}$ | $\nu_5 + \nu_9$ | 13 12 2 | 13 11 2 |
| 2575.2366 | 1.57 | $-0.26 \times 10^{-2}$ | $\nu_5 + \nu_9$ | 9 8 2   | 9 7 2   | 2583.9244 | 0.42 | $0.35 \times 10^{-3}$  | $\nu_5 + \nu_9$ | 14 12 2 | 14 11 4 |
| 2575.2366 | 1.57 | $-0.47 \times 10^{-2}$ | $\nu_5 + \nu_9$ | 9 8 1   | 9 7 3   | 2583.9244 | 0.42 | $0.36 \times 10^{-3}$  | $\nu_5 + \nu_9$ | 14 12 3 | 14 11 3 |
| 2575.3199 | 2.54 | $0.12 \times 10^{-2}$  | $\nu_5 + \nu_9$ | 2 1 1   | 1 0 1   | 2584.0952 | 0.36 | $0.98 \times 10^{-3}$  | $\nu_5 + \nu_9$ | 12 12 0 | 12 11 2 |
| 2575.4844 | 0.37 | $-0.44 \times 10^{-2}$ | $\nu_5 + \nu_9$ | 10 4 6  | 10 3 8  | 2584.0952 | 0.36 | $0.98 \times 10^{-3}$  | $\nu_5 + \nu_9$ | 12 12 1 | 12 11 1 |
| 2575.4844 | 0.37 | $-0.77 \times 10^{-3}$ | $\nu_5 + \nu_9$ | 14 9 6  | 14 8 6  | 2584.3147 | 0.11 | $-0.32 \times 10^{-2}$ | $\nu_5 + \nu_9$ | 14 7 8  | 14 4 10 |
| 2575.6100 | 1.19 | $0.64 \times 10^{-2}$  | $\nu_3 + \nu_4$ | 12 2 10 | 11 1 11 | 2584.3945 | 0.44 | $-0.13 \times 10^{-2}$ | $\nu_5 + \nu_9$ | 4 1 3   | 3 2 1   |
| 2575.6100 | 1.19 | $0.13 \times 10^{-2}$  | $\nu_5 + \nu_9$ | 8 8 0   | 8 7 2   | 2584.6048 | 0.17 | $-0.30 \times 10^{-2}$ | $\nu_5 + \nu_9$ | 5 1 5   | 4 2 3   |
| 2575.6100 | 1.19 | $0.16 \times 10^{-2}$  | $\nu_5 + \nu_9$ | 8 8 1   | 8 7 1   | 2585.1010 | 0.13 | $-0.18 \times 10^{-2}$ | $\nu_5 + \nu_9$ | 12 3 9  | 12 2 11 |
| 2575.6293 | 0.39 | $-0.46 \times 10^{-2}$ | $\nu_5 + \nu_9$ | 14 9 5  | 14 8 7  | 2585.2861 | 2.74 | $0.12 \times 10^{-2}$  | $\nu_5 + \nu_9$ | 3 3 0   | 2 2 0   |
| 2575.8962 | 0.64 | $-0.24 \times 10^{-2}$ | $\nu_5 + \nu_9$ | 7 2 5   | 7 1 7   | 2585.3868 | 3.70 | $0.10 \times 10^{-2}$  | $\nu_5 + \nu_9$ | 3 3 1   | 2 2 1   |



| (I)       | (II) | (III)                  | (IV)            | (V)             | (VI)      | (I)  | (II)                   | (III)           | (IV)            | (V) | (VI) |
|-----------|------|------------------------|-----------------|-----------------|-----------|------|------------------------|-----------------|-----------------|-----|------|
| 2585.5003 | 0.08 | $-0.47 \times 10^{-3}$ | $\nu_3 + \nu_4$ | 11 4 7 10 1 10  | 2604.7864 | 0.10 | $-0.26 \times 10^{-2}$ | $\nu_5 + \nu_7$ | 15 15 0 14 13 1 |     |      |
| 2585.7710 | 0.16 | $-0.28 \times 10^{-2}$ | $\nu_5 + \nu_9$ | 5 0 5 4 1 3     | 2604.8134 | 0.09 | $-0.17 \times 10^{-2}$ | $\nu_5 + \nu_9$ | 9 7 3 8 8 1     |     |      |
| 2585.8179 | 0.15 | $0.46 \times 10^{-3}$  | $\nu_5 + \nu_9$ | 11 7 5 11 4 7   | 2605.3814 | 2.59 | $0.10 \times 10^{-2}$  | $\nu_5 + \nu_9$ | 6 3 4 5 2 4     |     |      |
| 2585.9237 | 0.13 | $-0.13 \times 10^{-3}$ | $\nu_3 + \nu_4$ | 11 11 1 10 8 2  | 2605.4773 | 0.24 | $-0.19 \times 10^{-2}$ | $\nu_5 + \nu_9$ | 9 1 8 8 2 6     |     |      |
| 2585.9237 | 0.13 | $-0.51 \times 10^{-3}$ | $\nu_3 + \nu_4$ | 11 11 0 10 8 3  | 2606.5006 | 3.37 | $0.62 \times 10^{-2}$  | $\nu_5 + \nu_9$ | 6 4 2 5 3 2     |     |      |
| 2586.1128 | 0.12 | $0.33 \times 10^{-2}$  | $\nu_5 + \nu_9$ | 5 3 3 4 4 1     | 2606.7269 | 3.04 | $0.15 \times 10^{-3}$  | $\nu_5 + \nu_9$ | 9 6 3 8 7 1     |     |      |
| 2586.3853 | 0.30 | $-0.12 \times 10^{-2}$ | $\nu_5 + \nu_9$ | 13 13 1 13 12 1 | 2606.8668 | 2.51 | $0.51 \times 10^{-2}$  | $\nu_5 + \nu_9$ | 6 4 3 5 3 3     |     |      |
| 2586.3853 | 0.30 | $-0.12 \times 10^{-2}$ | $\nu_5 + \nu_9$ | 13 13 0 13 12 2 | 2607.0448 | 0.80 | $0.11 \times 10^{-2}$  | $\nu_5 + \nu_9$ | 11 0 11 10 1 9  |     |      |
| 2586.5125 | 0.21 | $-0.53 \times 10^{-3}$ | $\nu_5 + \nu_9$ | 5 2 4 4 3 2     | 2607.0614 | 0.10 | $-0.19 \times 10^{-2}$ | $\nu_5 + \nu_9$ | 11 1 11 10 2 9  |     |      |
| 2586.6438 | 0.16 | $-0.24 \times 10^{-2}$ | $\nu_5 + \nu_9$ | 14 13 2 14 12 2 | 2607.3259 | 0.26 | $-0.46 \times 10^{-2}$ | $\nu_5 + \nu_9$ | 8 2 6 7 3 4     |     |      |
| 2587.0397 | 0.20 | $0.38 \times 10^{-2}$  | $\nu_5 + \nu_9$ | 14 4 10 14 3 12 | 2608.0723 | 0.27 | $-0.32 \times 10^{-2}$ | $\nu_5 + \nu_9$ | 9 3 7 8 4 5     |     |      |
| 2587.0934 | 0.13 | $0.44 \times 10^{-2}$  | $\nu_5 + \nu_9$ | 5 3 2 4 4 0     | 2608.3270 | 0.16 | $0.34 \times 10^{-2}$  | $\nu_5 + \nu_9$ | 10 2 9 9 3 7    |     |      |
| 2587.5350 | 0.09 | $-0.26 \times 10^{-2}$ | $\nu_5 + \nu_9$ | 10 7 4 10 4 6   | 2608.5368 | 0.15 | $0.43 \times 10^{-2}$  | $\nu_5 + \nu_9$ | 10 1 9 9 2 7    |     |      |
| 2587.5792 | 0.47 | $-0.41 \times 10^{-2}$ | $\nu_5 + \nu_9$ | 12 2 10 12 1 12 | 2608.6172 | 0.24 | $0.29 \times 10^{-3}$  | $\nu_5 + \nu_9$ | 9 5 5 8 6 3     |     |      |
| 2588.7947 | 0.28 | $-0.43 \times 10^{-2}$ | $\nu_5 + \nu_9$ | 6 1 6 5 2 4     | 2608.8961 | 3.93 | $0.19 \times 10^{-2}$  | $\nu_5 + \nu_9$ | 6 5 1 5 4 1     |     |      |
| 2589.4119 | 0.11 | $-0.59 \times 10^{-3}$ | $\nu_5 + \nu_9$ | 9 7 3 9 4 5     | 2608.9262 | 2.83 | $0.17 \times 10^{-2}$  | $\nu_5 + \nu_9$ | 6 5 2 5 4 2     |     |      |
| 2589.4413 | 1.39 | $0.22 \times 10^{-2}$  | $\nu_5 + \nu_9$ | 6 0 6 5 1 4     | 2610.6979 | 6.17 | $0.12 \times 10^{-2}$  | $\nu_5 + \nu_9$ | 12 0 12 11 1 10 |     |      |
| 2589.6788 | 0.10 | $0.16 \times 10^{-2}$  | $\nu_5 + \nu_9$ | 3 3 0 2 0 2     | 2610.6979 | 6.17 | $0.48 \times 10^{-3}$  | $\nu_5 + \nu_9$ | 12 1 12 11 2 10 |     |      |
| 2589.8028 | 2.53 | $0.10 \times 10^{-2}$  | $\nu_5 + \nu_7$ | 13 13 1 12 11 2 | 2611.3388 | 0.99 | $-0.40 \times 10^{-2}$ | $\nu_5 + \nu_9$ | 7 1 6 6 0 6     |     |      |
| 2589.8028 | 2.53 | $-0.17 \times 10^{-2}$ | $\nu_5 + \nu_9$ | 4 1 3 3 0 3     | 2611.4085 | 1.52 | $-0.29 \times 10^{-2}$ | $\nu_5 + \nu_9$ | 7 2 6 6 1 6     |     |      |
| 2589.8802 | 0.32 | $-0.37 \times 10^{-2}$ | $\nu_5 + \nu_9$ | 5 1 4 4 2 2     | 2611.4244 | 2.07 | $0.75 \times 10^{-3}$  | $\nu_5 + \nu_9$ | 7 3 4 6 2 4     |     |      |
| 2589.9146 | 0.15 | $-0.66 \times 10^{-2}$ | $\nu_5 + \nu_9$ | 14 14 1 14 13 1 | 2611.4831 | 1.60 | $-0.46 \times 10^{-2}$ | $\nu_5 + \nu_9$ | 7 2 5 6 1 5     |     |      |
| 2589.9239 | 0.15 | $0.26 \times 10^{-2}$  | $\nu_5 + \nu_9$ | 14 14 0 14 13 2 | 2612.0740 | 0.14 | $-0.26 \times 10^{-2}$ | $\nu_5 + \nu_9$ | 11 1 10 10 2 8  |     |      |
| 2589.9239 | 0.15 | $0.27 \times 10^{-2}$  | $\nu_5 + \nu_9$ | 14 14 1 14 13 1 | 2612.1871 | 2.27 | $-0.83 \times 10^{-3}$ | $\nu_5 + \nu_9$ | 7 3 5 6 2 5     |     |      |
| 2589.9648 | 3.33 | $0.11 \times 10^{-2}$  | $\nu_5 + \nu_9$ | 4 2 2 3 1 2     | 2612.2029 | 0.37 | $-0.29 \times 10^{-2}$ | $\nu_5 + \nu_9$ | 11 2 10 10 3 8  |     |      |
| 2590.0369 | 0.26 | $0.42 \times 10^{-3}$  | $\nu_5 + \nu_9$ | 5 2 3 4 3 1     | 2612.4825 | 0.84 | $0.36 \times 10^{-2}$  | $\nu_5 + \nu_9$ | 10 3 8 9 4 6    |     |      |
| 2590.6392 | 1.73 | $0.26 \times 10^{-3}$  | $\nu_5 + \nu_9$ | 4 2 3 3 1 3     | 2612.7490 | 2.12 | $0.69 \times 10^{-2}$  | $\nu_5 + \nu_9$ | 7 4 3 6 3 3     |     |      |
| 2591.6036 | 3.45 | $0.29 \times 10^{-2}$  | $\nu_5 + \nu_9$ | 4 3 1 3 2 1     | 2613.4138 | 2.62 | $0.30 \times 10^{-2}$  | $\nu_5 + \nu_9$ | 7 4 4 6 3 4     |     |      |
| 2591.6416 | 0.64 | $-0.35 \times 10^{-2}$ | $\nu_5 + \nu_9$ | 6 2 5 5 3 3     | 2613.4913 | 0.28 | $0.73 \times 10^{-3}$  | $\nu_5 + \nu_9$ | 9 4 5 8 5 3     |     |      |
| 2591.9642 | 2.64 | $0.24 \times 10^{-2}$  | $\nu_5 + \nu_9$ | 4 3 2 3 2 2     | 2614.3322 | 0.14 | $-0.38 \times 10^{-2}$ | $\nu_5 + \nu_9$ | 13 1 13 12 2 11 |     |      |
| 2592.2159 | 0.18 | $0.18 \times 10^{-2}$  | $\nu_5 + \nu_9$ | 6 3 4 5 4 2     | 2614.3322 | 0.14 | $-0.41 \times 10^{-2}$ | $\nu_5 + \nu_9$ | 13 0 13 12 1 11 |     |      |
| 2592.7259 | 0.17 | $0.45 \times 10^{-3}$  | $\nu_5 + \nu_9$ | 7 1 7 6 2 5     | 2614.3956 | 0.17 | $-0.37 \times 10^{-2}$ | $\nu_5 + \nu_9$ | 10 2 8 9 3 6    |     |      |
| 2593.0232 | 0.15 | $-0.86 \times 10^{-3}$ | $\nu_5 + \nu_9$ | 7 0 7 6 1 5     | 2614.4439 | 0.12 | $0.49 \times 10^{-2}$  | $\nu_5 + \nu_9$ | 6 3 3 5 0 5     |     |      |
| 2593.9351 | 5.84 | $-0.11 \times 10^{-2}$ | $\nu_5 + \nu_9$ | 4 4 0 3 3 0     | 2615.0732 | 0.33 | $-0.44 \times 10^{-2}$ | $\nu_5 + \nu_9$ | 10 5 6 9 6 4    |     |      |
| 2593.9577 | 3.11 | $-0.82 \times 10^{-3}$ | $\nu_5 + \nu_9$ | 4 4 1 3 3 1     | 2615.1721 | 3.11 | $0.58 \times 10^{-2}$  | $\nu_5 + \nu_9$ | 7 5 2 6 4 2     |     |      |
| 2594.4401 | 1.55 | $0.46 \times 10^{-2}$  | $\nu_5 + \nu_9$ | 6 3 3 5 4 1     | 2615.2938 | 2.68 | $0.44 \times 10^{-2}$  | $\nu_5 + \nu_9$ | 7 5 3 6 4 3     |     |      |
| 2594.4663 | 0.29 | $-0.46 \times 10^{-2}$ | $\nu_5 + \nu_9$ | 6 1 5 5 2 3     | 2615.9296 | 0.09 | $0.19 \times 10^{-3}$  | $\nu_5 + \nu_9$ | 11 8 4 10 9 2   |     |      |
| 2596.3110 | 1.86 | $-0.24 \times 10^{-2}$ | $\nu_5 + \nu_9$ | 7 2 6 6 3 4     | 2617.5041 | 4.45 | $-0.52 \times 10^{-2}$ | $\nu_5 + \nu_9$ | 7 6 2 6 5 2     |     |      |
| 2596.4801 | 0.12 | $0.23 \times 10^{-2}$  | $\nu_5 + \nu_9$ | 8 1 8 7 2 6     | 2617.5041 | 4.45 | $0.71 \times 10^{-3}$  | $\nu_5 + \nu_9$ | 7 6 1 6 5 1     |     |      |
| 2596.6113 | 0.31 | $0.43 \times 10^{-2}$  | $\nu_5 + \nu_9$ | 8 0 8 7 1 6     | 2617.5654 | 2.12 | $-0.27 \times 10^{-2}$ | $\nu_5 + \nu_9$ | 11 2 9 10 3 7   |     |      |
| 2596.9729 | 2.51 | $0.29 \times 10^{-3}$  | $\nu_5 + \nu_9$ | 5 2 3 4 1 3     | 2617.7566 | 0.16 | $-0.16 \times 10^{-2}$ | $\nu_5 + \nu_9$ | 11 7 5 10 8 3   |     |      |
| 2597.0131 | 0.12 | $0.38 \times 10^{-2}$  | $\nu_5 + \nu_9$ | 4 3 1 3 0 3     | 2618.1007 | 1.49 | $-0.11 \times 10^{-2}$ | $\nu_5 + \nu_9$ | 14 0 14 13 1 12 |     |      |
| 2597.1496 | 1.43 | $-0.36 \times 10^{-2}$ | $\nu_5 + \nu_9$ | 5 1 4 4 0 4     | 2618.1007 | 1.49 | $-0.12 \times 10^{-2}$ | $\nu_5 + \nu_9$ | 14 1 14 13 2 12 |     |      |
| 2597.3203 | 0.25 | $0.21 \times 10^{-2}$  | $\nu_5 + \nu_9$ | 7 4 4 6 5 2     | 2618.1967 | 1.17 | $-0.18 \times 10^{-2}$ | $\nu_5 + \nu_9$ | 8 1 7 7 0 7     |     |      |
| 2597.5893 | 1.95 | $-0.17 \times 10^{-2}$ | $\nu_5 + \nu_9$ | 5 2 4 4 1 4     | 2618.2087 | 0.80 | $-0.18 \times 10^{-2}$ | $\nu_5 + \nu_9$ | 8 2 7 7 1 7     |     |      |
| 2597.8429 | 0.56 | $0.11 \times 10^{-2}$  | $\nu_5 + \nu_9$ | 9 8 2 9 5 4     | 2618.5073 | 2.10 | $-0.29 \times 10^{-2}$ | $\nu_5 + \nu_9$ | 8 3 5 7 2 5     |     |      |
| 2597.9583 | 0.33 | $-0.83 \times 10^{-3}$ | $\nu_5 + \nu_9$ | 7 3 5 6 4 3     | 2618.7347 | 1.56 | $-0.49 \times 10^{-2}$ | $\nu_5 + \nu_9$ | 8 2 6 7 1 6     |     |      |
| 2597.9769 | 2.63 | $0.41 \times 10^{-2}$  | $\nu_5 + \nu_9$ | 5 3 2 4 2 2     | 2619.0063 | 1.70 | $-0.22 \times 10^{-2}$ | $\nu_5 + \nu_9$ | 8 3 6 7 2 6     |     |      |
| 2598.3437 | 0.15 | $-0.37 \times 10^{-2}$ | $\nu_5 + \nu_9$ | 7 1 6 6 2 4     | 2619.1842 | 2.37 | $0.51 \times 10^{-2}$  | $\nu_5 + \nu_9$ | 8 4 4 7 3 4     |     |      |
| 2598.6308 | 3.23 | $0.23 \times 10^{-2}$  | $\nu_5 + \nu_9$ | 5 3 3 4 2 3     | 2620.0452 | 1.70 | $0.14 \times 10^{-2}$  | $\nu_5 + \nu_9$ | 8 4 5 7 3 5     |     |      |
| 2600.1237 | 0.33 | $0.60 \times 10^{-3}$  | $\nu_5 + \nu_9$ | 9 1 9 8 2 7     | 2620.0452 | 1.70 | $-0.30 \times 10^{-2}$ | $\nu_5 + \nu_9$ | 11 4 8 10 5 6   |     |      |
| 2600.1567 | 0.12 | $-0.40 \times 10^{-2}$ | $\nu_5 + \nu_9$ | 8 6 3 7 7 1     | 2620.8876 | 0.18 | $-0.39 \times 10^{-3}$ | $\nu_5 + \nu_9$ | 10 4 6 9 5 4    |     |      |
| 2600.1869 | 0.08 | $0.38 \times 10^{-2}$  | $\nu_5 + \nu_9$ | 8 6 2 7 7 0     | 2621.6978 | 4.35 | $-0.68 \times 10^{-2}$ | $\nu_5 + \nu_9$ | 8 5 4 7 4 4     |     |      |
| 2600.2636 | 3.03 | $0.34 \times 10^{-2}$  | $\nu_5 + \nu_9$ | 5 4 1 4 3 1     | 2621.7304 | 0.14 | $-0.17 \times 10^{-2}$ | $\nu_5 + \nu_9$ | 7 4 3 6 1 5     |     |      |
| 2600.3903 | 3.75 | $0.26 \times 10^{-2}$  | $\nu_5 + \nu_9$ | 5 4 2 4 3 2     | 2622.5180 | 0.08 | $-0.40 \times 10^{-2}$ | $\nu_5 + \nu_9$ | 14 2 13 13 3 11 |     |      |
| 2600.5800 | 1.11 | $0.83 \times 10^{-3}$  | $\nu_5 + \nu_9$ | 8 2 7 7 3 5     | 2623.7636 | 2.90 | $0.26 \times 10^{-2}$  | $\nu_5 + \nu_9$ | 8 6 2 7 5 2     |     |      |
| 2600.9904 | 0.06 | $0.16 \times 10^{-2}$  | $\nu_5 + \nu_9$ | 4 4 0 3 1 2     | 2623.7934 | 1.95 | $0.24 \times 10^{-2}$  | $\nu_5 + \nu_9$ | 8 6 3 7 5 3     |     |      |
| 2601.8276 | 0.18 | $-0.30 \times 10^{-2}$ | $\nu_5 + \nu_9$ | 8 1 7 7 2 5     | 2624.0836 | 0.17 | $0.47 \times 10^{-2}$  | $\nu_5 + \nu_9$ | 11 3 8 10 4 6   |     |      |
| 2601.8437 | 0.17 | $0.86 \times 10^{-3}$  | $\nu_5 + \nu_9$ | 7 3 4 6 4 2     | 2624.7525 | 0.07 | $0.54 \times 10^{-2}$  | $\nu_5 + \nu_9$ | 7 5 2 6 2 4     |     |      |
| 2602.1014 | 0.13 | $0.49 \times 10^{-2}$  | $\nu_5 + \nu_9$ | 8 5 4 7 6 2     | 2624.9296 | 0.76 | $0.78 \times 10^{-3}$  | $\nu_5 + \nu_9$ | 9 2 8 8 1 8     |     |      |
| 2603.5363 | 0.15 | $0.19 \times 10^{-2}$  | $\nu_5 + \nu_9$ | 8 4 5 7 5 3     | 2625.0137 | 0.41 | $0.32 \times 10^{-2}$  | $\nu_5 + \nu_9$ | 12 4 9 11 5 7   |     |      |
| 2603.6834 | 0.09 | $0.23 \times 10^{-2}$  | $\nu_5 + \nu_9$ | 4 4 1 3 1 3     | 2625.2137 | 0.35 | $-0.20 \times 10^{-2}$ | $\nu_5 + \nu_9$ | 9 1 8 8 0 8     |     |      |
| 2603.7636 | 4.37 | $0.48 \times 10^{-2}$  | $\nu_5 + \nu_9$ | 10 1 10 9 2 8   | 2625.7166 | 1.22 | $-0.55 \times 10^{-2}$ | $\nu_5 + \nu_9$ | 9 3 6 8 2 6     |     |      |
| 2604.3379 | 1.72 | $-0.47 \times 10^{-2}$ | $\nu_5 + \nu_9$ | 6 1 5 5 0 5     | 2625.7988 | 2.07 | $-0.52 \times 10^{-2}$ | $\nu_5 + \nu_9$ | 9 3 7 8 2 7     |     |      |
| 2604.5278 | 1.26 | $-0.26 \times 10^{-2}$ | $\nu_5 + \nu_9$ | 6 2 5 5 1 5     | 2625.8638 | 0.17 | $-0.14 \times 10^{-2}$ | $\nu_5 + \nu_9$ | 12 6 7 11 7 5   |     |      |
| 2604.5429 | 0.22 | $0.87 \times 10^{-3}$  | $\nu_5 + \nu_9$ | 9 2 8 8 3 6     | 2625.8876 | 1.53 | $0.25 \times 10^{-2}$  | $\nu_5 + \nu_9$ | 9 4 5 8 3 5     |     |      |
| 2604.5702 | 3.53 | $0.29 \times 10^{-2}$  | $\nu_5 + \nu_9$ | 6 3 3 5 2 3     | 2626.4321 | 0.92 | $-0.14 \times 10^{-2}$ | $\nu_5 + \nu_9$ | 16 0 16 15 1 14 |     |      |

| (I)       | (II) | (III)                  | (IV)            | (V) | (VI) | (I)   | (II) | (III)     | (IV) | (V)                    | (VI)            |    |      |         |
|-----------|------|------------------------|-----------------|-----|------|-------|------|-----------|------|------------------------|-----------------|----|------|---------|
| 2626.4321 | 0.92 | $0.21 \times 10^{-2}$  | $\nu_5 + \nu_9$ | 16  | 1 16 | 15    | 2 14 | 2648.0126 | 0.06 | $0.42 \times 10^{-2}$  | $\nu_5 + \nu_9$ | 10 | 6 4  | 9 3 6   |
| 2626.7467 | 1.63 | $-0.25 \times 10^{-2}$ | $\nu_5 + \nu_9$ | 9   | 4 6  | 8 3   | 6    | 2648.1411 | 0.72 | $0.44 \times 10^{-2}$  | $\nu_5 + \nu_9$ | 12 | 6 6  | 11 5 6  |
| 2627.1061 | 5.36 | $-0.41 \times 10^{-2}$ | $\nu_5 + \nu_9$ | 13  | 9 5  | 12 10 | 3    | 2648.9656 | 0.52 | $-0.66 \times 10^{-2}$ | $\nu_5 + \nu_9$ | 12 | 6 7  | 11 5 7  |
| 2627.3829 | 0.17 | $0.54 \times 10^{-3}$  | $\nu_5 + \nu_9$ | 12  | 3 9  | 11 4  | 7    | 2649.3854 | 1.55 | $-0.53 \times 10^{-2}$ | $\nu_5 + \nu_9$ | 12 | 5 8  | 11 4 8  |
| 2628.0366 | 0.71 | $0.31 \times 10^{-3}$  | $\nu_5 + \nu_9$ | 12  | 5 8  | 11 6  | 6    | 2649.6405 | 2.13 | $-0.33 \times 10^{-2}$ | $\nu_5 + \nu_9$ | 11 | 9 2  | 10 8 2  |
| 2628.2167 | 2.00 | $-0.48 \times 10^{-3}$ | $\nu_5 + \nu_9$ | 9   | 5 5  | 8 4   | 5    | 2649.6405 | 2.13 | $-0.35 \times 10^{-2}$ | $\nu_5 + \nu_9$ | 11 | 9 3  | 10 8 3  |
| 2628.4536 | 4.33 | $-0.20 \times 10^{-3}$ | $\nu_5 + \nu_9$ | 8   | 8 0  | 7 7   | 0    | 2650.8332 | 0.37 | $0.17 \times 10^{-2}$  | $\nu_5 + \nu_9$ | 10 | 4 6  | 9 1 8   |
| 2628.4536 | 4.33 | $-0.22 \times 10^{-3}$ | $\nu_5 + \nu_9$ | 8   | 8 1  | 7 7   | 1    | 2650.8772 | 0.79 | $0.11 \times 10^{-2}$  | $\nu_5 + \nu_9$ | 12 | 7 5  | 11 6 5  |
| 2629.0008 | 0.11 | $0.32 \times 10^{-2}$  | $\nu_5 + \nu_9$ | 13  | 8 5  | 12 9  | 3    | 2650.9817 | 0.53 | $0.42 \times 10^{-2}$  | $\nu_5 + \nu_9$ | 13 | 1 12 | 12 0 12 |
| 2629.9561 | 1.51 | $0.39 \times 10^{-2}$  | $\nu_5 + \nu_9$ | 9   | 6 3  | 8 5   | 3    | 2651.0874 | 0.54 | $-0.18 \times 10^{-2}$ | $\nu_5 + \nu_9$ | 12 | 7 6  | 11 6 6  |
| 2630.0604 | 2.10 | $0.25 \times 10^{-2}$  | $\nu_5 + \nu_9$ | 9   | 6 4  | 8 5   | 4    | 2651.7512 | 0.29 | $-0.41 \times 10^{-2}$ | $\nu_5 + \nu_9$ | 13 | 3 11 | 12 2 11 |
| 2630.7007 | 0.11 | $0.43 \times 10^{-3}$  | $\nu_5 + \nu_9$ | 13  | 5 9  | 12 6  | 7    | 2652.0319 | 0.12 | $0.15 \times 10^{-3}$  | $\nu_5 + \nu_9$ | 8  | 8 0  | 7 5 2   |
| 2630.7883 | 0.10 | $-0.11 \times 10^{-2}$ | $\nu_5 + \nu_9$ | 13  | 7 7  | 12 8  | 5    | 2652.0575 | 2.15 | $0.78 \times 10^{-3}$  | $\nu_5 + \nu_9$ | 11 | 10 1 | 10 9 1  |
| 2631.5182 | 0.58 | $0.54 \times 10^{-2}$  | $\nu_5 + \nu_9$ | 10  | 1 9  | 9 0   | 9    | 2652.0575 | 2.15 | $0.78 \times 10^{-3}$  | $\nu_5 + \nu_9$ | 11 | 10 2 | 10 9 2  |
| 2631.6016 | 0.43 | $0.34 \times 10^{-2}$  | $\nu_5 + \nu_9$ | 10  | 2 9  | 9 1   | 9    | 2652.2165 | 0.33 | $0.56 \times 10^{-2}$  | $\nu_5 + \nu_9$ | 13 | 4 10 | 12 3 10 |
| 2632.3771 | 3.80 | $-0.54 \times 10^{-2}$ | $\nu_5 + \nu_9$ | 9   | 7 3  | 8 6   | 3    | 2653.0975 | 0.09 | $0.36 \times 10^{-2}$  | $\nu_5 + \nu_9$ | 13 | 2 11 | 12 1 11 |
| 2632.3771 | 3.80 | $0.70 \times 10^{-3}$  | $\nu_5 + \nu_9$ | 9   | 7 2  | 8 6   | 2    | 2653.4240 | 0.78 | $0.21 \times 10^{-3}$  | $\nu_5 + \nu_9$ | 12 | 8 4  | 11 7 4  |
| 2632.5595 | 0.69 | $-0.28 \times 10^{-2}$ | $\nu_5 + \nu_9$ | 10  | 3 8  | 9 2   | 8    | 2653.4440 | 0.57 | $-0.24 \times 10^{-3}$ | $\nu_5 + \nu_9$ | 12 | 8 5  | 11 7 5  |
| 2632.8410 | 1.49 | $-0.40 \times 10^{-3}$ | $\nu_5 + \nu_9$ | 10  | 4 6  | 9 3   | 6    | 2653.4711 | 0.36 | $-0.13 \times 10^{-2}$ | $\nu_5 + \nu_9$ | 13 | 3 10 | 12 2 10 |
| 2632.8410 | 1.49 | $-0.60 \times 10^{-3}$ | $\nu_5 + \nu_9$ | 12  | 5 7  | 11 6  | 5    | 2653.5266 | 0.48 | $-0.23 \times 10^{-3}$ | $\nu_5 + \nu_9$ | 13 | 5 9  | 12 4 9  |
| 2632.9900 | 0.19 | $-0.30 \times 10^{-2}$ | $\nu_5 + \nu_9$ | 12  | 4 8  | 11 5  | 6    | 2654.1797 | 0.35 | $0.37 \times 10^{-2}$  | $\nu_5 + \nu_9$ | 13 | 4 9  | 12 3 9  |
| 2633.5033 | 0.88 | $-0.58 \times 10^{-2}$ | $\nu_5 + \nu_9$ | 10  | 4 7  | 9 3   | 7    | 2654.2843 | 0.70 | $0.95 \times 10^{-3}$  | $\nu_5 + \nu_9$ | 13 | 6 7  | 12 5 7  |
| 2633.6154 | 0.16 | $-0.15 \times 10^{-2}$ | $\nu_5 + \nu_9$ | 14  | 9 6  | 13 10 | 4    | 2654.4085 | 0.34 | $-0.29 \times 10^{-3}$ | $\nu_5 + \nu_9$ | 13 | 5 8  | 12 4 8  |
| 2633.9068 | 1.44 | $0.51 \times 10^{-2}$  | $\nu_5 + \nu_9$ | 10  | 5 5  | 9 4   | 5    | 2654.9717 | 0.17 | $-0.84 \times 10^{-3}$ | $\nu_5 + \nu_9$ | 10 | 5 6  | 9 2 8   |
| 2634.7354 | 3.94 | $-0.42 \times 10^{-2}$ | $\nu_5 + \nu_9$ | 9   | 8 1  | 8 7   | 1    | 2655.3044 | 0.11 | $0.55 \times 10^{-3}$  | $\nu_5 + \nu_9$ | 10 | 7 3  | 9 4 5   |
| 2634.7354 | 3.94 | $-0.44 \times 10^{-2}$ | $\nu_5 + \nu_9$ | 9   | 8 2  | 8 7   | 2    | 2655.3519 | 0.72 | $-0.44 \times 10^{-2}$ | $\nu_5 + \nu_9$ | 13 | 6 8  | 12 5 8  |
| 2634.8842 | 1.50 | $-0.50 \times 10^{-2}$ | $\nu_5 + \nu_9$ | 10  | 5 6  | 9 4   | 6    | 2655.8816 | 1.27 | $-0.13 \times 10^{-2}$ | $\nu_5 + \nu_9$ | 12 | 9 4  | 11 8 4  |
| 2635.4717 | 0.12 | $0.26 \times 10^{-2}$  | $\nu_5 + \nu_9$ | 14  | 8 7  | 13 9  | 5    | 2655.8816 | 1.27 | $-0.31 \times 10^{-3}$ | $\nu_5 + \nu_9$ | 12 | 9 3  | 11 8 3  |
| 2635.6520 | 0.14 | $0.21 \times 10^{-2}$  | $\nu_5 + \nu_9$ | 13  | 6 7  | 12 7  | 5    | 2656.9118 | 0.42 | $0.39 \times 10^{-2}$  | $\nu_5 + \nu_9$ | 13 | 7 6  | 12 6 6  |
| 2635.7514 | 0.13 | $-0.14 \times 10^{-2}$ | $\nu_5 + \nu_9$ | 14  | 8 6  | 13 9  | 4    | 2657.3375 | 0.56 | $-0.50 \times 10^{-4}$ | $\nu_5 + \nu_9$ | 13 | 7 7  | 12 6 7  |
| 2636.0582 | 1.54 | $0.32 \times 10^{-2}$  | $\nu_5 + \nu_9$ | 10  | 6 4  | 9 5   | 4    | 2657.6761 | 0.20 | $0.46 \times 10^{-2}$  | $\nu_5 + \nu_9$ | 14 | 2 13 | 13 1 13 |
| 2636.3311 | 1.13 | $-0.22 \times 10^{-3}$ | $\nu_5 + \nu_9$ | 10  | 6 5  | 9 5   | 5    | 2657.9657 | 0.13 | $0.62 \times 10^{-3}$  | $\nu_5 + \nu_9$ | 9  | 8 1  | 8 5 3   |
| 2637.1010 | 5.77 | $-0.45 \times 10^{-2}$ | $\nu_5 + \nu_9$ | 8   | 6 2  | 7 3   | 4    | 2658.3379 | 1.42 | $0.26 \times 10^{-2}$  | $\nu_5 + \nu_9$ | 12 | 10 3 | 11 9 3  |
| 2637.1010 | 5.77 | $0.62 \times 10^{-2}$  | $\nu_5 + \nu_9$ | 9   | 9 0  | 8 8   | 0    | 2658.3379 | 1.42 | $0.26 \times 10^{-2}$  | $\nu_5 + \nu_9$ | 12 | 10 2 | 11 9 2  |
| 2637.1010 | 5.77 | $0.62 \times 10^{-2}$  | $\nu_5 + \nu_9$ | 9   | 9 1  | 8 8   | 1    | 2658.4053 | 0.30 | $-0.36 \times 10^{-2}$ | $\nu_5 + \nu_9$ | 14 | 2 12 | 13 1 12 |
| 2637.2135 | 1.27 | $0.44 \times 10^{-2}$  | $\nu_5 + \nu_9$ | 14  | 7 8  | 13 8  | 6    | 2658.4336 | 0.19 | $-0.47 \times 10^{-2}$ | $\nu_5 + \nu_9$ | 10 | 7 4  | 9 4 6   |
| 2637.4638 | 0.10 | $0.48 \times 10^{-2}$  | $\nu_5 + \nu_9$ | 8   | 5 4  | 7 2   | 6    | 2659.5850 | 0.87 | $0.43 \times 10^{-2}$  | $\nu_5 + \nu_9$ | 13 | 8 5  | 12 7 5  |
| 2637.6743 | 0.23 | $-0.85 \times 10^{-3}$ | $\nu_5 + \nu_9$ | 8   | 4 5  | 7 1   | 7    | 2659.6472 | 0.54 | $0.41 \times 10^{-2}$  | $\nu_5 + \nu_9$ | 13 | 8 6  | 12 7 6  |
| 2638.5998 | 1.70 | $-0.10 \times 10^{-2}$ | $\nu_5 + \nu_9$ | 10  | 7 3  | 9 6   | 3    | 2660.2825 | 1.38 | $0.58 \times 10^{-2}$  | $\nu_5 + \nu_9$ | 14 | 5 10 | 13 4 10 |
| 2638.6251 | 1.18 | $-0.15 \times 10^{-2}$ | $\nu_5 + \nu_9$ | 10  | 7 4  | 9 6   | 4    | 2660.7827 | 1.42 | $0.55 \times 10^{-2}$  | $\nu_5 + \nu_9$ | 12 | 11 2 | 11 10 2 |
| 2639.3406 | 0.59 | $0.53 \times 10^{-3}$  | $\nu_5 + \nu_9$ | 11  | 3 9  | 10 2  | 9    | 2660.7827 | 1.42 | $0.55 \times 10^{-2}$  | $\nu_5 + \nu_9$ | 12 | 11 1 | 11 10 1 |
| 2639.5466 | 0.14 | $0.59 \times 10^{-2}$  | $\nu_5 + \nu_9$ | 7   | 7 1  | 6 4   | 3    | 2661.7829 | 0.27 | $0.16 \times 10^{-3}$  | $\nu_5 + \nu_9$ | 14 | 6 9  | 13 5 9  |
| 2639.8595 | 1.51 | $0.14 \times 10^{-2}$  | $\nu_5 + \nu_9$ | 11  | 3 8  | 10 2  | 8    | 2662.1061 | 0.73 | $0.35 \times 10^{-2}$  | $\nu_5 + \nu_9$ | 13 | 9 4  | 12 8 4  |
| 2639.9689 | 0.69 | $-0.21 \times 10^{-2}$ | $\nu_5 + \nu_9$ | 11  | 4 7  | 10 3  | 7    | 2662.1061 | 0.73 | $-0.89 \times 10^{-3}$ | $\nu_5 + \nu_9$ | 13 | 9 5  | 12 8 5  |
| 2639.9975 | 0.15 | $-0.10 \times 10^{-3}$ | $\nu_5 + \nu_9$ | 13  | 5 8  | 12 6  | 6    | 2662.9648 | 0.97 | $-0.23 \times 10^{-2}$ | $\nu_5 + \nu_9$ | 14 | 7 7  | 13 6 7  |
| 2640.3003 | 4.96 | $-0.13 \times 10^{-3}$ | $\nu_5 + \nu_9$ | 8   | 6 3  | 7 3   | 5    | 2663.1784 | 1.58 | $0.59 \times 10^{-3}$  | $\nu_5 + \nu_9$ | 12 | 12 0 | 11 11 0 |
| 2640.4872 | 0.72 | $0.49 \times 10^{-2}$  | $\nu_5 + \nu_9$ | 11  | 5 6  | 10 4  | 6    | 2663.1784 | 1.58 | $0.59 \times 10^{-3}$  | $\nu_5 + \nu_9$ | 12 | 12 1 | 11 11 1 |
| 2640.9920 | 2.72 | $-0.47 \times 10^{-2}$ | $\nu_5 + \nu_9$ | 10  | 8 2  | 9 7   | 2    | 2663.6014 | 0.09 | $0.20 \times 10^{-2}$  | $\nu_5 + \nu_9$ | 10 | 8 2  | 9 5 4   |
| 2640.9920 | 2.72 | $-0.58 \times 10^{-2}$ | $\nu_5 + \nu_9$ | 10  | 8 3  | 9 7   | 3    | 2663.6222 | 0.26 | $-0.28 \times 10^{-2}$ | $\nu_5 + \nu_9$ | 14 | 7 8  | 13 6 8  |
| 2642.0901 | 1.72 | $0.47 \times 10^{-2}$  | $\nu_5 + \nu_9$ | 11  | 6 5  | 10 5  | 5    | 2664.6081 | 0.79 | $-0.12 \times 10^{-3}$ | $\nu_5 + \nu_9$ | 13 | 10 3 | 12 9 3  |
| 2642.3488 | 0.66 | $0.20 \times 10^{-2}$  | $\nu_5 + \nu_9$ | 9   | 6 3  | 8 3   | 5    | 2664.6081 | 0.79 | $-0.29 \times 10^{-3}$ | $\nu_5 + \nu_9$ | 13 | 10 4 | 12 9 4  |
| 2642.6275 | 1.02 | $-0.43 \times 10^{-2}$ | $\nu_5 + \nu_9$ | 11  | 6 6  | 10 5  | 6    | 2664.6488 | 0.91 | $-0.24 \times 10^{-2}$ | $\nu_5 + \nu_9$ | 9  | 9 0  | 8 6 2   |
| 2643.3810 | 3.15 | $-0.21 \times 10^{-2}$ | $\nu_5 + \nu_9$ | 10  | 9 1  | 9 8   | 1    | 2664.6669 | 0.25 | $0.48 \times 10^{-2}$  | $\nu_5 + \nu_9$ | 9  | 9 1  | 8 6 3   |
| 2643.3810 | 3.15 | $-0.22 \times 10^{-2}$ | $\nu_5 + \nu_9$ | 10  | 9 2  | 9 8   | 2    | 2665.6880 | 0.32 | $-0.24 \times 10^{-2}$ | $\nu_5 + \nu_9$ | 14 | 8 6  | 13 7 6  |
| 2644.2973 | 0.19 | $0.57 \times 10^{-2}$  | $\nu_5 + \nu_9$ | 12  | 2 11 | 11 1  | 11   | 2665.8460 | 1.41 | $-0.44 \times 10^{-3}$ | $\nu_5 + \nu_9$ | 14 | 8 7  | 13 7 7  |
| 2644.7740 | 0.88 | $-0.25 \times 10^{-3}$ | $\nu_5 + \nu_9$ | 11  | 7 4  | 10 6  | 4    | 2667.1138 | 0.82 | $-0.28 \times 10^{-2}$ | $\nu_5 + \nu_9$ | 13 | 11 2 | 12 10 2 |
| 2644.8551 | 1.14 | $-0.25 \times 10^{-2}$ | $\nu_5 + \nu_9$ | 11  | 7 5  | 10 6  | 5    | 2667.1138 | 0.82 | $-0.28 \times 10^{-2}$ | $\nu_5 + \nu_9$ | 13 | 11 3 | 12 10 3 |
| 2645.7625 | 3.82 | $0.41 \times 10^{-2}$  | $\nu_5 + \nu_9$ | 10  | 10 1 | 9 9   | 1    | 2668.3055 | 0.30 | $-0.48 \times 10^{-2}$ | $\nu_5 + \nu_9$ | 14 | 9 5  | 13 8 5  |
| 2645.7625 | 3.82 | $0.41 \times 10^{-2}$  | $\nu_5 + \nu_9$ | 10  | 10 0 | 9 9   | 0    | 2668.3219 | 0.23 | $-0.34 \times 10^{-2}$ | $\nu_5 + \nu_9$ | 14 | 9 6  | 13 8 6  |
| 2646.6856 | 0.56 | $-0.18 \times 10^{-2}$ | $\nu_5 + \nu_9$ | 12  | 3 9  | 11 2  | 9    | 2670.9012 | 0.32 | $-0.30 \times 10^{-2}$ | $\nu_5 + \nu_9$ | 14 | 10 4 | 13 9 4  |
| 2646.6856 | 0.56 | $-0.28 \times 10^{-2}$ | $\nu_5 + \nu_9$ | 12  | 3 10 | 11 2  | 10   | 2670.9012 | 0.32 | $-0.38 \times 10^{-2}$ | $\nu_5 + \nu_9$ | 14 | 10 5 | 13 9 5  |
| 2647.1239 | 0.58 | $-0.33 \times 10^{-2}$ | $\nu_5 + \nu_9$ | 12  | 4 8  | 11 3  | 8    | 2676.1805 | 0.58 | $-0.67 \times 10^{-3}$ | $\nu_5 + \nu_9$ |    |      |         |
